# Supplementary material for: Damage-responsive, maturity-silenced enhancers regulate multiple genes that direct regeneration in Drosophila
Source: eLife. 2020 Jun 3;9:e58305. doi: 10.7554/eLife.58305 (PMC7299344; doi:10.7554/eLife.58305)
Supplement: Supplementary file 1. — For each comparison the basic peak attributes are shown (chromosome, start and end dm3 coordinates, width in bp, unique peak ID and mean signal) and values of the peaks in each sample comparison (log2 fold change in signal, standard error, p value and adjusted p value). [file elife-58305-supp1.xlsx]

## Sheet: EL3 damaged vs undamaged
Peak Attributes						Young Undamaged vs. Young Damaged
Chr	Start	End	Width	Peak ID	BaseMean	log2 Fold Change	Standard Error	P Value	Adjusted P Value
chr3L	16168171	16169502	1332	Peak_7278	938.545	1.23972	0.187389	3.69667e-11	3.09744e-07
chr3R	26352564	26353548	985	Peak_11289	624.817	-0.897956	0.160531	2.22337e-08	6.20987e-05
chr2R	8664182	8665265	1084	Peak_3548	1147.23	0.949641	0.168417	1.71412e-08	6.20987e-05
chr2R	11123907	11125462	1556	Peak_3870	678.585	1.13216	0.209289	6.31877e-08	0.000132362
chrX	18445634	18447153	1520	Peak_13763	1065.91	0.763549	0.149381	3.19768e-07	0.000535867
chr2L	16597687	16598647	961	Peak_1910	545.105	1.28706	0.253871	3.9838e-07	0.000556338
chr2R	10368254	10370363	2110	Peak_3782	1638.49	-0.704788	0.147769	1.84647e-06	0.00193395
chr3L	7821027	7821628	602	Peak_6184	325.817	-0.943484	0.196916	1.65702e-06	0.00193395
chr3R	19918346	19919176	831	Peak_10588	504.893	-1.30234	0.278672	2.96289e-06	0.00206884
chr3R	8877602	8878530	929	Peak_9266	609.707	0.866246	0.18461	2.70148e-06	0.00206884
chrX	18136983	18138248	1266	Peak_13716	987.55	-1.18251	0.250471	2.34513e-06	0.00206884
chr3L	14639039	14640900	1862	Peak_7090	684.844	0.919075	0.196317	2.8466e-06	0.00206884
chr3R	21009960	21010921	962	Peak_10719	993.975	-0.878763	0.191554	4.48496e-06	0.00234872
chr2R	14143699	14145669	1971	Peak_4244	917.72	0.736842	0.160306	4.29736e-06	0.00234872
chr2L	16281828	16282477	650	Peak_1862	383.557	1.0598	0.230848	4.41308e-06	0.00234872
chr3R	18008747	18010546	1800	Peak_10375	616.757	1.03271	0.223037	3.65293e-06	0.00234872
chr3R	10957185	10957893	709	Peak_9517	881.519	-0.92196	0.202886	5.51358e-06	0.0026199
chr2L	17702229	17702929	701	Peak_1984	380.721	-0.974047	0.214553	5.62814e-06	0.0026199
chr2L	1642992	1643992	1001	Peak_231	952.503	-0.827853	0.183976	6.80233e-06	0.00299983
chr2R	17256167	17258063	1897	Peak_4643	976.473	0.67717	0.151064	7.3714e-06	0.00308825
chrX	19254972	19255679	708	Peak_13885	929.939	-0.670369	0.151176	9.23466e-06	0.00351715
chr2R	20252798	20253536	739	Peak_5063	315.848	1.11554	0.251454	9.14922e-06	0.00351715
chr2R	5276898	5277814	917	Peak_3060	385.704	-0.767321	0.173653	9.92979e-06	0.00361747
chr3L	16166916	16167939	1024	Peak_7277	821.756	1.03818	0.237178	1.20206e-05	0.0041967
chr2R	19460551	19461404	854	Peak_4931	391.2	-1.12674	0.260739	1.55099e-05	0.00519829
chr3L	17557494	17558231	738	Peak_7471	396.054	0.980769	0.227528	1.62852e-05	0.00523978
chr2R	7462957	7463550	594	Peak_3372	437.697	0.950466	0.220908	1.68843e-05	0.00523978
chr2L	3538497	3540391	1895	Peak_436	2175.01	-0.800107	0.18735	1.94901e-05	0.00583241
chr2L	3090311	3090852	542	Peak_397	414.862	-0.92198	0.219286	2.61699e-05	0.00756129
chr2R	16801177	16802110	934	Peak_4580	1179	-0.918474	0.219356	2.8249e-05	0.00788994
chr3L	18620612	18621277	666	Peak_7621	424.199	0.846182	0.202543	2.94362e-05	0.00795632
chr3R	22286899	22288238	1340	Peak_10855	670.433	-0.674736	0.161891	3.07513e-05	0.00800031
chr3L	14124347	14125167	821	Peak_7005	963.903	-0.815044	0.195817	3.15086e-05	0.00800031
chr3R	9843260	9843857	598	Peak_9386	404.132	-0.85333	0.206531	3.60042e-05	0.00887292
chrX	5906513	5907899	1387	Peak_12300	1537.51	-0.649871	0.157987	3.89809e-05	0.0090728
chr3L	8029483	8030257	775	Peak_6216	310.852	-1.22154	0.296559	3.80465e-05	0.0090728
chrX	6669260	6670279	1020	Peak_12401	678.749	0.774795	0.190187	4.62384e-05	0.0104711
chr2L	12404285	12404977	693	Peak_1457	433.031	-1.12479	0.2777	5.1132e-05	0.0112746
chrX	19439971	19441103	1133	Peak_13907	840.25	-0.887101	0.219989	5.51911e-05	0.0118576
chr2R	14548753	14550415	1663	Peak_4321	678.974	0.78728	0.195831	5.81467e-05	0.0121803
chrX	5910332	5911655	1324	Peak_12302	730.157	0.834496	0.208304	6.1718e-05	0.0126131
chr2R	17500213	17500877	665	Peak_4684	358.909	-0.693268	0.173491	6.44263e-05	0.012853
chr3R	14275856	14276432	577	Peak_9923	446.804	-0.752892	0.189036	6.811e-05	0.0132719
chr2R	6046916	6047954	1039	Peak_3174	1235.95	-0.667796	0.167969	7.01725e-05	0.0133631
chrX	9534737	9535581	845	Peak_12747	320.901	-1.11724	0.282166	7.50996e-05	0.0136453
chr3L	2566658	2567756	1099	Peak_5569	744.909	-1.1092	0.280457	7.65398e-05	0.0136453
chr2R	13720929	13722015	1087	Peak_4189	978.989	0.911681	0.230248	7.50903e-05	0.0136453
chrX	4317789	4318509	721	Peak_12130	440.923	-1.07187	0.275297	9.88042e-05	0.016592
chr2R	2347223	2348349	1127	Peak_2644	559.661	0.79305	0.20393	0.000100725	0.016592
chr3L	5854954	5857470	2517	Peak_5965	1539.41	0.757073	0.194947	0.00010297	0.016592
chr2L	18463660	18464594	935	Peak_2033	854.287	0.82061	0.211168	0.00010189	0.016592
chr3L	10896910	10897514	605	Peak_6569	265.612	1.04814	0.269861	0.000102749	0.016592
chr2R	9844793	9845921	1129	Peak_3695	1195.38	-0.72696	0.188285	0.000112946	0.0171354
chr2R	20276897	20277416	520	Peak_5070	279.406	-0.962954	0.249628	0.000114522	0.0171354
chr2L	11445410	11446590	1181	Peak_1396	2180.05	-0.867214	0.224732	0.000113908	0.0171354
chr3R	26087116	26089431	2316	Peak_11250	1782.39	0.732156	0.18954	0.000112092	0.0171354
chr3L	11003317	11004212	896	Peak_6602	1187.68	-0.919177	0.239752	0.000126143	0.0173456
chr3L	18764182	18765278	1097	Peak_7638	999.719	-0.870413	0.226074	0.000118059	0.0173456
chr3L	12412906	12414268	1363	Peak_6788	786.786	0.868209	0.226344	0.000125158	0.0173456
chr3R	799092	799959	868	Peak_8285	358.633	0.777796	0.202889	0.000126277	0.0173456
chr3R	19773945	19775414	1470	Peak_10570	1219.08	0.633588	0.164922	0.00012216	0.0173456
chr2R	2970609	2971712	1104	Peak_2736	377.8	0.951921	0.248618	0.000128741	0.0173987
chr2R	6505682	6506283	602	Peak_3237	462.075	-0.727138	0.190225	0.000132097	0.0175689
chrX	3664834	3665588	755	Peak_12062	394.66	-0.815404	0.213994	0.000138738	0.0176399
chr3R	10172448	10173117	670	Peak_9421	609.136	-0.857918	0.224833	0.000135743	0.0176399
chr2R	13698603	13699439	837	Peak_4182	432.085	0.97235	0.255208	0.000138947	0.0176399
chr2L	18795839	18796832	994	Peak_2089	1100.84	-0.875218	0.231971	0.000161315	0.0195893
chrX	9539749	9541488	1740	Peak_12748	1017.03	-0.925631	0.244998	0.000158024	0.0195893
chr2R	9350235	9351047	813	Peak_3632	410.827	0.885847	0.23462	0.000159577	0.0195893
chrX	18202975	18203962	988	Peak_13736	1670.14	-1.00406	0.266473	0.000164584	0.019637
chr3R	26668325	26669634	1310	Peak_11323	1074.4	0.775047	0.205843	0.000166396	0.019637
chr3L	20614569	20615490	922	Peak_7869	2250.62	-0.809354	0.215415	0.000171837	0.0199364
chr3R	15139523	15140620	1098	Peak_10037	711.401	0.682395	0.181809	0.000174485	0.0199364
chr2R	20225076	20227245	2170	Peak_5056	1029.88	0.944359	0.251756	0.00017607	0.0199364
chr2L	18871195	18872504	1310	Peak_2100	436.545	0.958623	0.256425	0.000185189	0.0206894
chr2L	5403395	5404113	719	Peak_658	1102.86	-0.894106	0.239513	0.000189206	0.0208599
chrX	5911913	5912753	841	Peak_12303	348.427	1.14401	0.306727	0.000191696	0.02086
chrX	4940293	4941595	1303	Peak_12210	2121.94	-0.753394	0.202273	0.000195594	0.0210113
chr2R	3609972	3610909	938	Peak_2839	1057.87	-0.636611	0.171378	0.000203478	0.0211829
chr3L	18751895	18752795	901	Peak_7632	1454.55	-0.773612	0.208199	0.000202609	0.0211829
chr3R	18958726	18959357	632	Peak_10453	260.447	0.781275	0.210413	0.000204776	0.0211829
chrX	17572272	17573062	791	Peak_13649	289.046	-0.875807	0.236183	0.00020876	0.0213318
chr2L	20242569	20243072	504	Peak_2266	287.416	-0.996086	0.269786	0.000222385	0.021922
chrX	12981403	12981905	503	Peak_13097	305.404	-0.95321	0.257902	0.000219014	0.021922
chr2L	4567049	4568084	1036	Peak_548	415.611	0.855397	0.231516	0.000220094	0.021922
chr2L	11071740	11072985	1246	Peak_1336	422.682	0.960745	0.260716	0.000228682	0.0220245
chrX	5909250	5910019	770	Peak_12301	295.394	1.14311	0.31018	0.000228429	0.0220245
chr2L	12617625	12618939	1315	Peak_1496	1752	-0.814003	0.221712	0.000241183	0.0229644
chr3R	6375613	6377711	2099	Peak_9020	899.57	0.862786	0.235978	0.000255962	0.0240978
chr3R	17029537	17030200	664	Peak_10212	307.765	-1.00128	0.275287	0.000275616	0.0246726
chrX	6768914	6769458	545	Peak_12422	450.536	-1.0362	0.285231	0.000280322	0.0246726
chr3R	4781014	4781584	571	Peak_8795	429.807	-1.02035	0.281712	0.000292381	0.0246726
chr2R	13709495	13710358	864	Peak_4186	1081.56	-0.733827	0.202707	0.000294458	0.0246726
chrX	8785108	8786171	1064	Peak_12655	1398.61	-0.6477	0.178536	0.000285796	0.0246726
chr4	527373	529487	2115	Peak_11509	3540.42	-0.69416	0.191377	0.000286529	0.0246726
chr2L	552207	553784	1578	Peak_101	1695.95	-0.667572	0.183588	0.000276643	0.0246726
chr2R	8929449	8930072	624	Peak_3599	706.626	-0.813421	0.223456	0.000272445	0.0246726
chr3R	8293470	8293857	388	Peak_9232	341.378	-0.977747	0.269058	0.000279092	0.0246726
chr3L	7364487	7365147	661	Peak_6145	293.308	0.757583	0.208	0.000270287	0.0246726
chr3R	9350249	9353046	2798	Peak_9309	1128.85	0.716401	0.197887	0.000294305	0.0246726
chr2R	2569231	2570294	1064	Peak_2697	637.497	-1.14027	0.315556	0.000302061	0.024773
chrX	8107698	8108678	981	Peak_12577	1408.96	-0.80255	0.22238	0.000307482	0.024773
chr3L	607887	609876	1990	Peak_5288	1260.39	0.661818	0.18327	0.000304831	0.024773
chr2L	18002864	18004106	1243	Peak_1999	671.864	0.629368	0.174385	0.000307287	0.024773
chr3L	13221412	13222187	776	Peak_6928	1172.86	-0.735232	0.203926	0.000311686	0.0248725
chr3R	4687555	4688849	1295	Peak_8779	887.704	0.631458	0.175281	0.000315111	0.0249086
chrX	16419606	16420622	1017	Peak_13494	476.878	-0.855744	0.238816	0.000339316	0.0258466
chr3R	10522299	10523313	1015	Peak_9478	928.109	-0.626127	0.17455	0.000334377	0.0258466
chr3L	5177221	5178523	1303	Peak_5904	1323.51	-0.683974	0.190824	0.00033796	0.0258466
chrX	16041506	16042522	1017	Peak_13446	1202.57	-0.773915	0.21578	0.000335025	0.0258466
chr3R	5753997	5755089	1093	Peak_8942	1279.61	-0.575628	0.161153	0.000354358	0.0267492
chr3L	20096923	20097678	756	Peak_7799	554.972	-0.795845	0.223896	0.000378655	0.0283282
chrX	3671127	3671698	572	Peak_12065	409.753	-0.701999	0.198595	0.000408047	0.0292316
chr3L	8442788	8443567	780	Peak_6272	534.51	-0.682057	0.192958	0.000408175	0.0292316
chr3R	10108990	10110202	1213	Peak_9411	974.525	-0.719465	0.203141	0.000397545	0.0292316
chr2R	1638195	1639372	1178	Peak_2568	1188.22	0.72591	0.205113	0.000401547	0.0292316
chr3R	17731004	17732057	1054	Peak_10337	428.416	0.75127	0.212475	0.000406542	0.0292316
chr2R	11989924	11992636	2713	Peak_3983	2251.9	-0.644285	0.182501	0.000415071	0.0293448
chr3R	12655675	12656175	501	Peak_9764	501.51	-0.859953	0.243839	0.000420742	0.0293448
chr3R	12589328	12590185	858	Peak_9759	1536.52	-0.82738	0.23473	0.000423765	0.0293448
chrX	13031037	13032050	1014	Peak_13108	304.154	0.926964	0.262826	0.00042044	0.0293448
chrX	4305264	4305928	665	Peak_12127	1214.07	-0.777262	0.221118	0.000439516	0.0301861
chr2L	16612613	16613445	833	Peak_1914	343.701	-0.987678	0.281622	0.000453003	0.0308595
chr2R	15156251	15156789	539	Peak_4391	496.153	-0.786878	0.224678	0.000461348	0.0309233
chr2L	12854433	12854932	500	Peak_1523	370.584	-0.685262	0.195895	0.000468568	0.0309233
chrX	5899367	5900575	1209	Peak_12296	354.019	0.894805	0.255802	0.000468702	0.0309233
chr3R	15106802	15109926	3125	Peak_10024	1847.45	0.573802	0.163787	0.000459458	0.0309233
chr2L	5435575	5436218	644	Peak_663	389.477	0.727439	0.208522	0.000485641	0.0317905
chrX	13135283	13135755	473	Peak_13122	257.795	0.757201	0.217743	0.000506105	0.0328733
chr2R	6115279	6115957	679	Peak_3183	943.16	-0.650979	0.187407	0.000513524	0.0330986
chr3L	15239299	15240032	734	Peak_7169	388.289	0.771114	0.22238	0.000525218	0.0335939
chrX	4320578	4321356	779	Peak_12132	1864	-0.734445	0.212039	0.000532758	0.033818
chr2L	16842522	16843282	761	Peak_1943	292.169	0.901865	0.261122	0.000552732	0.0348221
chr3L	6763063	6764582	1520	Peak_6063	1008.43	0.609082	0.176865	0.000573672	0.0358716
chr3L	20980395	20981998	1604	Peak_7918	444.041	0.770901	0.224131	0.000582775	0.0361709
chrX	8700496	8701112	617	Peak_12644	726.782	-0.775498	0.226587	0.000620438	0.0379464
chr3L	15207272	15207935	664	Peak_7159	281.242	0.917713	0.267985	0.000615949	0.0379464
chrX	3330835	3332538	1704	Peak_12025	793.081	0.651169	0.190467	0.000628965	0.0381891
chr3R	4484397	4484906	510	Peak_8742	294.83	-0.765324	0.224236	0.000642453	0.0384543
chr3R	12220810	12221748	939	Peak_9705	348.529	0.86736	0.254134	0.000642511	0.0384543
chr2R	9426907	9427716	810	Peak_3647	865.73	-0.583983	0.171297	0.000651573	0.0387201
chr3L	11421415	11421886	472	Peak_6679	325.185	-0.8387	0.246739	0.000675998	0.0396914
chr3R	3605367	3606431	1065	Peak_8634	793.27	-0.665869	0.195926	0.000677392	0.0396914
chr3R	5934802	5936114	1313	Peak_8964	1061.24	-0.536141	0.158222	0.000702659	0.040886
chr3L	18750108	18750734	627	Peak_7631	332.456	-1.12512	0.333087	0.000730532	0.0422147
chr3R	10111768	10112818	1051	Peak_9412	954.409	-0.675113	0.201011	0.000783405	0.0446541
chr3L	18022571	18023072	502	Peak_7552	399.384	-0.737301	0.219434	0.000779374	0.0446541
chrX	19243084	19243614	531	Peak_13881	364.136	-0.865266	0.258383	0.000811712	0.0453422
chr2L	16532685	16533771	1087	Peak_1899	1443.62	-0.571271	0.17046	0.000804201	0.0453422
chr2R	13149125	13150796	1672	Peak_4112	3574.69	-0.663155	0.197942	0.00080738	0.0453422
chr2R	8910240	8911842	1603	Peak_3594	1048.92	0.710116	0.212594	0.000837058	0.0464484
chr3R	19026704	19027347	644	Peak_10466	1093.49	-0.670043	0.201988	0.000909097	0.050114
chr3L	5623550	5624219	670	Peak_5938	940.722	-0.664377	0.201073	0.00095262	0.0514968
chr2L	5238529	5239003	475	Peak_632	271.865	0.960727	0.290636	0.000947716	0.0514968
chrX	17444192	17445597	1406	Peak_13632	870.637	0.539266	0.163115	0.000946239	0.0514968
chr3L	17599800	17600373	574	Peak_7484	354.369	-0.725624	0.219767	0.000960691	0.0516002
chr2L	14418657	14419390	734	Peak_1681	483.242	-0.929222	0.281593	0.000967283	0.0516233
chr2R	14155146	14158045	2900	Peak_4248	1409.78	0.582653	0.176976	0.000993818	0.0527038
chr2L	9783881	9784688	808	Peak_1186	467.296	0.595737	0.182919	0.00112658	0.0593686
chr2L	3861265	3861947	683	Peak_492	278.076	0.674568	0.207257	0.00113498	0.0594376
chr3L	15181403	15183106	1704	Peak_7149	1257.2	0.58979	0.181415	0.00114979	0.0598391
chr3L	2808046	2809045	1000	Peak_5592	1039.85	-0.64162	0.197914	0.00118727	0.060269
chr2L	6791886	6792460	575	Peak_809	608.046	-0.586683	0.181014	0.00119074	0.060269
chr2L	21618625	21619307	683	Peak_2415	286.454	-0.770219	0.237351	0.00117424	0.060269
chrX	7498409	7499117	709	Peak_12498	1192.61	-0.808894	0.249494	0.00118637	0.060269
chr2R	14558864	14560215	1352	Peak_4322	678.406	0.606779	0.18726	0.00119402	0.060269
chr3R	18023312	18024164	853	Peak_10380	402.472	0.89856	0.277552	0.00120603	0.060511
chr2R	15852644	15853831	1188	Peak_4471	467.868	0.67918	0.209921	0.00121471	0.0605836
chr3R	6659869	6661396	1528	Peak_9064	1021.65	0.6353	0.196541	0.00122749	0.0608591
chrX	20041420	20042328	909	Peak_13977	250.17	-1.02107	0.316271	0.00124459	0.0610756
chr3L	11001914	11002769	856	Peak_6601	765.294	-0.574398	0.17794	0.00124644	0.0610756
chr2R	7524755	7525448	694	Peak_3393	476.34	-0.704499	0.218712	0.0012769	0.0616115
chrX	1127800	1128575	776	Peak_11697	807.675	-0.644982	0.200239	0.00127719	0.0616115
chr3R	22681202	22682186	985	Peak_10880	373.373	0.773291	0.240111	0.00127944	0.0616115
chr3R	3804057	3805066	1010	Peak_8653	474.356	0.641798	0.199432	0.00129026	0.0617777
chr3L	881682	882356	675	Peak_5370	289.61	-0.70239	0.218828	0.00132834	0.0625291
chr3R	8889572	8890465	894	Peak_9268	1465.13	-0.880383	0.274253	0.00132681	0.0625291
chr3L	20917706	20918728	1023	Peak_7907	542.356	0.886915	0.276127	0.0013182	0.0625291
chrX	18757575	18759720	2146	Peak_13808	2310.43	-0.556864	0.173646	0.0013418	0.0627355
chr3R	6357890	6358644	755	Peak_9015	363.557	0.719817	0.224548	0.0013477	0.0627355
chr2R	8903011	8903622	612	Peak_3592	628.272	-0.68966	0.2158	0.00139427	0.0638393
chr3L	377158	378607	1450	Peak_5247	2310.82	-0.799639	0.250085	0.00138642	0.0638393
chr2L	16485580	16487106	1527	Peak_1892	2104.39	-0.598128	0.187088	0.00138842	0.0638393
chr2R	11684688	11685572	885	Peak_3934	354.429	-0.653319	0.204789	0.00142173	0.0642675
chr2L	11074219	11074796	578	Peak_1337	292.075	0.828402	0.259752	0.00142663	0.0642675
chr3L	22169519	22170485	967	Peak_8086	906.296	0.587074	0.183965	0.00141674	0.0642675
chr2L	16520114	16521861	1748	Peak_1897	1095.4	-0.509068	0.16044	0.00150903	0.0655137
chr3R	18498799	18500100	1302	Peak_10423	388.774	-0.583572	0.183872	0.00150457	0.0655137
chr3R	22014278	22014865	588	Peak_10839	566.97	-0.609501	0.191975	0.00149891	0.0655137
chr2L	9567432	9567960	529	Peak_1158	436.383	-0.761816	0.239861	0.00149282	0.0655137
chrX	4318811	4319673	863	Peak_12131	1669.91	-0.672943	0.211551	0.00146767	0.0655137
chr3R	19125837	19127077	1241	Peak_10478	689.25	0.531346	0.167399	0.00150289	0.0655137
chr2L	21878895	21880279	1385	Peak_2459	1295.99	0.808084	0.254393	0.00149053	0.0655137
chr2R	7487322	7488115	794	Peak_3380	488.644	-0.780592	0.246487	0.00154091	0.0662312
chr3L	16173968	16174492	525	Peak_7282	250.494	0.689784	0.217819	0.00154136	0.0662312
chr3L	16172376	16173404	1029	Peak_7281	536.906	0.675449	0.213455	0.00155421	0.0664426
chrX	8544478	8545613	1136	Peak_12622	2118.45	-0.723252	0.228911	0.00158018	0.0672099
chrX	10239842	10240396	555	Peak_12813	254.972	-0.898192	0.284634	0.00160164	0.0677784
chr2R	5842169	5843174	1006	Peak_3132	1104.95	-0.772144	0.245003	0.00162397	0.0683782
chrX	5454399	5455091	693	Peak_12239	1179.94	-0.937358	0.298425	0.00168361	0.070535
chr2L	19508272	19509075	804	Peak_2192	677.165	-0.544872	0.173567	0.00169374	0.0706063
chrX	11027981	11028686	706	Peak_12902	280.888	-0.888523	0.283222	0.00170571	0.0707533
chr2L	4626921	4627999	1079	Peak_561	426.044	-0.875124	0.279506	0.0017423	0.0710201
chrX	13884390	13885255	866	Peak_13229	784.746	-0.738715	0.236191	0.00176231	0.0710201
chrX	16042947	16043515	569	Peak_13447	722.965	-0.721819	0.230358	0.00172751	0.0710201
chrX	7585762	7586994	1233	Peak_12510	761.104	-0.649581	0.207599	0.00175395	0.0710201
chr3R	6643311	6644023	713	Peak_9059	315.936	0.84143	0.26889	0.00175239	0.0710201
chr2R	3913017	3914179	1163	Peak_2881	391.639	0.895455	0.286316	0.001763	0.0710201
chr3R	6458941	6460225	1285	Peak_9039	526.531	0.976634	0.312829	0.0017966	0.0720275
chr3L	2493321	2494092	772	Peak_5563	352.867	-0.605297	0.194169	0.00182466	0.0724635
chr3R	27514711	27515574	864	Peak_11410	1133.14	-0.670558	0.215104	0.00182478	0.0724635
chr3L	10729750	10730900	1151	Peak_6534	2041.77	-0.61387	0.197254	0.00185779	0.0734265
chr2L	3606329	3607243	915	Peak_458	1373.26	-0.669651	0.21566	0.00190196	0.0748195
chr3L	4825355	4826079	725	Peak_5887	784.638	-0.62089	0.200189	0.00192532	0.0753518
chrX	16806951	16807650	700	Peak_13555	567.561	-0.651119	0.210114	0.00194247	0.0753518
chr2L	7050486	7051064	579	Peak_847	362.295	0.696191	0.224589	0.00193625	0.0753518
chr3R	5705347	5706627	1281	Peak_8933	799.763	-0.893656	0.28873	0.00196725	0.0754753
chrX	9623034	9623748	715	Peak_12759	956.724	-0.762581	0.24637	0.00196638	0.0754753
chr3R	19040624	19041677	1054	Peak_10467	600.902	-0.609065	0.19692	0.00198169	0.0754753
chr2R	20254094	20254916	823	Peak_5064	371.884	0.940128	0.303912	0.0019786	0.0754753
chr3L	21272907	21273527	621	Peak_7967	250.614	-0.732216	0.237477	0.00204713	0.076814
chr2R	2932362	2933974	1613	Peak_2732	859.055	-0.817898	0.265133	0.00203647	0.076814
chrX	1762617	1763317	701	Peak_11781	316.287	0.622981	0.202061	0.00204831	0.076814
chr3R	23025996	23028139	2144	Peak_10938	1613.6	0.746821	0.242287	0.00205351	0.076814
chr3L	15258061	15258559	499	Peak_7175	332.247	0.826038	0.268138	0.00206554	0.0769206
chr3L	11480312	11481132	821	Peak_6685	575.347	-0.645561	0.210477	0.00216121	0.0769812
chrX	18586709	18587561	853	Peak_13786	454.701	-0.628094	0.204814	0.00216463	0.0769812
chrX	8050877	8052398	1522	Peak_12570	956.165	0.536436	0.175105	0.00218757	0.0769812
chr3L	3034974	3035760	787	Peak_5617	505.086	-0.657832	0.214178	0.00213037	0.0769812
chr2R	1976466	1977057	592	Peak_2598	386.427	-0.679828	0.221218	0.00211834	0.0769812
chr2R	4984732	4985738	1007	Peak_3023	380.761	0.627891	0.205326	0.00222801	0.0769812
chr2R	16771896	16772441	546	Peak_4577	609.547	-0.693622	0.226431	0.00218926	0.0769812
chr2R	6451566	6452807	1242	Peak_3225	1224.1	-0.571355	0.186867	0.00223158	0.0769812
chr3L	7349414	7350275	862	Peak_6139	580.127	0.625203	0.203249	0.00209766	0.0769812
chr2L	10756096	10756597	502	Peak_1293	423.872	-0.528607	0.172716	0.00220926	0.0769812
chr3R	9700447	9701242	796	Peak_9355	1433.87	-0.655035	0.213171	0.00212049	0.0769812
chr3R	6439815	6440894	1080	Peak_9034	2618.55	-0.754186	0.246696	0.00223454	0.0769812
chrX	1718246	1719191	946	Peak_11768	901.111	-0.820038	0.267843	0.00220129	0.0769812
chr2R	2019237	2019910	674	Peak_2608	924.118	-0.546897	0.178557	0.0021923	0.0769812
chr3L	14699481	14700079	599	Peak_7096	768.904	-0.754535	0.245827	0.00214507	0.0769812
chrX	12401485	12402409	925	Peak_13037	438.16	0.525236	0.170785	0.0021021	0.0769812
chr2R	2981417	2982430	1014	Peak_2740	422.219	0.862962	0.282366	0.00224173	0.0769812
chr2R	17790803	17792599	1797	Peak_4728	703.067	0.665378	0.216592	0.00212601	0.0769812
chr2R	11712345	11713483	1139	Peak_3941	480.594	0.801262	0.262009	0.00222714	0.0769812
chr2R	1578553	1579866	1314	Peak_2554	1542.76	-0.746325	0.244433	0.00226351	0.077412
chr2R	6315292	6316722	1431	Peak_3198	1126.08	-0.577533	0.189731	0.00233488	0.0792636
chr2L	21796328	21797245	918	Peak_2436	617.397	0.676198	0.222249	0.00234603	0.0792636
chr2L	3004204	3005109	906	Peak_388	398.243	0.727096	0.238918	0.00234012	0.0792636
chr3R	6442318	6443214	897	Peak_9035	1342.27	-0.640962	0.210858	0.00236754	0.0796374
chr2L	16422560	16423235	676	Peak_1881	641.971	-0.668611	0.22012	0.00238561	0.0796374
chr2R	10304033	10304808	776	Peak_3769	399.679	0.799028	0.263048	0.00238492	0.0796374
chr3R	7905509	7905991	483	Peak_9186	260.319	-0.8742	0.288089	0.00240957	0.0801182
chr3R	13769363	13769993	631	Peak_9859	723.845	-0.588797	0.194338	0.00244748	0.080578
chr3R	25597143	25598109	967	Peak_11175	1606.03	-0.62342	0.205886	0.00246186	0.080578
chrX	3570644	3572037	1394	Peak_12038	1918.15	-0.602299	0.198787	0.00244653	0.080578
chrX	4089248	4089831	584	Peak_12109	264.537	-0.745898	0.246306	0.00245901	0.080578
chr2L	7495257	7496618	1362	Peak_912	1394.57	-0.619724	0.205023	0.00250532	0.0814044
chr3L	3542365	3544149	1785	Peak_5717	1634.84	-0.497287	0.164543	0.00250921	0.0814044
chr2R	16722577	16724201	1625	Peak_4572	1379.24	-0.478945	0.158519	0.00251626	0.0814044
chr2L	12545777	12546891	1115	Peak_1485	922.95	-0.657449	0.217726	0.00253089	0.0815629
chr3R	22996302	22997652	1351	Peak_10929	643.291	0.674484	0.223625	0.00256012	0.0821886
chr3L	18793098	18794829	1732	Peak_7642	2051.64	-0.516942	0.171832	0.0026262	0.0839552
chrX	4976337	4979056	2720	Peak_12218	2815.67	-0.506622	0.168504	0.00264204	0.0839552
chr3L	12460908	12461660	753	Peak_6800	1367.55	-0.651655	0.216769	0.0026452	0.0839552
chrX	1942870	1944966	2097	Peak_11811	2247.13	-0.641201	0.213417	0.00266059	0.0840522
chr3R	24410885	24411844	960	Peak_11024	1101.27	-0.622121	0.207188	0.00267614	0.0840522
chr3R	2862713	2863779	1067	Peak_8564	2085.14	-0.583612	0.19438	0.00267836	0.0840522
chr2L	91482	92413	932	Peak_15	474.957	0.518349	0.172731	0.00269179	0.0841586
chr2L	8424699	8425349	651	Peak_1042	304.311	-0.808568	0.270103	0.00275746	0.0843239
chrX	18542022	18542842	821	Peak_13776	291.774	0.581219	0.194087	0.00274773	0.0843239
chrX	5679453	5681394	1942	Peak_12262	1097.09	0.572127	0.191026	0.00274421	0.0843239
chr2L	8466632	8467670	1039	Peak_1047	454.627	0.475631	0.158755	0.00273533	0.0843239
chr2L	699174	700228	1055	Peak_132	539.405	0.819959	0.273857	0.00275241	0.0843239
chrX	6536717	6537797	1081	Peak_12374	459.084	0.659993	0.22039	0.00274751	0.0843239
chrX	17662019	17662669	651	Peak_13671	1064.12	-0.681181	0.227898	0.0027992	0.085289
chrX	18206403	18207226	824	Peak_13737	1712.72	-0.642232	0.215026	0.00281947	0.0855955
chr2R	5816978	5817736	759	Peak_3126	574.102	-0.82252	0.27561	0.00284175	0.0856512
chr2R	10670097	10671323	1227	Peak_3807	594.254	0.849832	0.284758	0.00284132	0.0856512
chr3L	1470100	1470760	661	Peak_5441	267.997	0.770604	0.258576	0.00288073	0.0865148
chr3L	10764409	10766380	1972	Peak_6544	1579.12	-0.610326	0.204995	0.00290816	0.086717
chrX	12364117	12364704	588	Peak_13032	516.482	-0.579211	0.194512	0.00290352	0.086717
chr4	1000293	1001106	814	Peak_11545	571.11	-0.623279	0.20969	0.00295492	0.087799
chr2R	19519582	19520260	679	Peak_4939	605.341	-0.532146	0.179189	0.00298048	0.0882453
chr3L	1007617	1008377	761	Peak_5375	296.703	-0.619039	0.208868	0.00303889	0.0887207
chr3R	9638295	9638990	696	Peak_9342	841.553	-0.712681	0.240354	0.00302561	0.0887207
chr3L	20688288	20689075	788	Peak_7881	1034.01	-0.604093	0.203787	0.00303345	0.0887207
chr3R	21561255	21561782	528	Peak_10779	308.948	-0.654053	0.220668	0.00303693	0.0887207
chr3R	10198484	10199667	1184	Peak_9428	877.143	-0.611769	0.20678	0.0030909	0.0893056
chr2R	20701100	20701646	547	Peak_5121	558.469	-0.709657	0.239784	0.00308068	0.0893056
chr3R	12672883	12673381	499	Peak_9765	500.062	-0.77079	0.260458	0.00308272	0.0893056
chrX	12643931	12647180	3250	Peak_13081	5990	-0.571123	0.193437	0.00315215	0.0907624
chr3L	5940917	5942237	1321	Peak_5975	539.182	0.790614	0.268199	0.00319974	0.0918173
chr2R	4514719	4515831	1113	Peak_2945	373.933	0.503417	0.171051	0.00324957	0.0929287
chr3R	17683058	17683940	883	Peak_10327	373.897	-0.781558	0.26752	0.00348356	0.0943299
chr3L	9454774	9456288	1515	Peak_6412	999.878	-0.487573	0.167008	0.00350644	0.0943299
chr3L	10668821	10669294	474	Peak_6518	282.65	-0.694667	0.236955	0.00337175	0.0943299
chr2L	7983949	7984503	555	Peak_969	842.755	-0.503457	0.172308	0.00347958	0.0943299
chr2R	15042372	15042972	601	Peak_4378	381.464	-0.574772	0.196976	0.00352309	0.0943299
chr3R	12145832	12146524	693	Peak_9694	525.769	-0.697336	0.238835	0.00350325	0.0943299
chr2L	547932	549063	1132	Peak_100	806.656	-0.633378	0.216558	0.0034474	0.0943299
chrX	12678806	12679323	518	Peak_13087	419.488	-0.599736	0.204897	0.00342244	0.0943299
chrX	7501906	7502757	852	Peak_12500	1158.71	-0.609856	0.208453	0.00343759	0.0943299
chr2L	14094621	14095016	396	Peak_1642	253.005	-0.716098	0.244621	0.00341832	0.0943299
chr2L	6065532	6066415	884	Peak_724	340.524	0.556428	0.190693	0.00352372	0.0943299
chr4	827583	829099	1517	Peak_11533	1230.57	-0.560576	0.191067	0.00334707	0.0943299
chrX	7520746	7521762	1017	Peak_12503	1554.86	-0.587768	0.200603	0.00338956	0.0943299
chr3R	8255769	8257525	1757	Peak_9221	752.751	0.452925	0.155137	0.00350577	0.0943299
chr3R	14814705	14817177	2473	Peak_9976	892.013	0.669095	0.228182	0.00336475	0.0943299
chr2R	10320570	10321369	800	Peak_3775	666.246	0.647809	0.221346	0.00342607	0.0943299
chr3L	666123	667941	1819	Peak_5307	874.816	0.616168	0.210229	0.0033794	0.0943299
chr3L	6295399	6296361	963	Peak_6015	264.549	0.694717	0.237109	0.00339015	0.0943299
chr2L	15457544	15458107	564	Peak_1825	251.831	0.797017	0.27296	0.00350137	0.0943299
chr3L	1268979	1269516	538	Peak_5403	265.236	0.687615	0.235609	0.00351774	0.0943299
chrX	3055631	3057423	1793	Peak_11987	4059.93	-0.630257	0.216209	0.0035564	0.0949016
chr3R	1638855	1639939	1085	Peak_8422	726.696	-0.883492	0.303293	0.00357973	0.0950924
chr3R	16605560	16606585	1026	Peak_10160	1110.2	0.763444	0.262133	0.00358625	0.0950924
chrX	589845	590424	580	Peak_11631	299.108	-0.806084	0.277117	0.00362798	0.0955937
chr3R	5178076	5179919	1844	Peak_8855	1294.94	-0.44995	0.154643	0.00361894	0.0955937
chr3R	14411147	14411558	412	Peak_9938	298.588	-0.57552	0.198169	0.0036821	0.0967157
chr3R	912186	914128	1943	Peak_8317	2221.02	-0.529498	0.18246	0.003708	0.0969522
chr2L	1972569	1973275	707	Peak_269	1140.9	-0.601864	0.207434	0.00371424	0.0969522
chrX	6624310	6625643	1334	Peak_12390	754.349	-0.531355	0.1832	0.00372687	0.0969795
chr2R	7513299	7514388	1090	Peak_3390	696.177	-0.519254	0.17927	0.0037737	0.0972917
chr3R	12528446	12529138	693	Peak_9752	1100.11	-0.614446	0.21208	0.00376466	0.0972917
chr2L	3631910	3633302	1393	Peak_462	1833.03	-0.500093	0.172625	0.00376767	0.0972917
chr2L	3825353	3825768	416	Peak_486	325.997	-0.70388	0.24324	0.00380647	0.0975301
chr2L	10200849	10202107	1259	Peak_1229	398.101	0.587794	0.203272	0.00383208	0.0975301
chr3L	14170511	14171398	888	Peak_7011	1395.62	-0.685442	0.237231	0.00386055	0.0975301
chr3R	2826249	2827122	874	Peak_8557	2299.98	-0.592295	0.204709	0.00381161	0.0975301
chr3L	16031963	16033037	1075	Peak_7252	256.19	0.76103	0.263421	0.00386442	0.0975301
chr3R	2775438	2778097	2660	Peak_8543	1432.33	0.617959	0.213759	0.00384125	0.0975301
chr2L	11398909	11399599	691	Peak_1385	265.723	0.86429	0.299003	0.00384541	0.0975301
chr3R	20451049	20451932	884	Peak_10654	917.455	-0.449932	0.155804	0.00387937	0.0976134
chr2L	20120813	20121429	617	Peak_2260	447.147	-0.743751	0.257872	0.00392422	0.0978603
chr3L	5544081	5544611	531	Peak_5917	405.25	-0.554058	0.192077	0.00391957	0.0978603
chr3L	14971430	14972061	632	Peak_7115	932.771	0.534015	0.185086	0.00391123	0.0978603
chrX	7861061	7862498	1438	Peak_12547	923.425	-0.506212	0.176062	0.00403778	0.0980653
chr3L	16044810	16046125	1316	Peak_7258	909.79	-0.582433	0.20232	0.00399233	0.0980653
chrX	13457507	13458400	894	Peak_13174	1310.1	-0.560958	0.194947	0.00400849	0.0980653
chrX	16535361	16536173	813	Peak_13514	251.961	0.822198	0.28579	0.00401568	0.0980653
chrX	580219	582190	1972	Peak_11629	2767.08	-0.481896	0.167493	0.00401334	0.0980653
chr2L	15333398	15334124	727	Peak_1799	1424.99	-0.573122	0.199177	0.00400896	0.0980653
chrX	10451057	10451986	930	Peak_12834	1093.4	-0.627506	0.218241	0.00403664	0.0980653
chr3L	7142164	7143037	874	Peak_6118	552.605	0.617965	0.214835	0.00402152	0.0980653
chr2L	14642216	14642755	540	Peak_1746	417.002	0.741265	0.257549	0.00400015	0.0980653
chr2R	18129331	18129933	603	Peak_4758	741.505	-0.607888	0.211538	0.00405747	0.0982588
chr3R	5046044	5046497	454	Peak_8831	299.055	-0.722053	0.251702	0.00412185	0.0989598
chrX	17780138	17781718	1581	Peak_13695	1249.29	-0.546756	0.190532	0.00410958	0.0989598
chr3L	2191959	2192582	624	Peak_5534	473.431	-0.513023	0.178816	0.00411776	0.0989598
chr3R	8198307	8199062	756	Peak_9214	397.456	-0.729897	0.254748	0.00416776	0.0989911
chr3L	2576665	2577662	998	Peak_5571	439.556	-0.627879	0.219025	0.00414779	0.0989911
chr2L	3579743	3581268	1526	Peak_449	1606.8	-0.743707	0.259343	0.00413528	0.0989911
chr3L	18009572	18010149	578	Peak_7549	590.58	-0.526741	0.183953	0.00419045	0.0989911
chr2L	5421440	5422150	711	Peak_660	788.885	-0.602775	0.210526	0.00419404	0.0989911
chr2R	15696501	15697310	810	Peak_4441	300.43	0.736845	0.257338	0.00419208	0.0989911
chr2R	9806927	9807572	646	Peak_3683	470.518	-0.575414	0.201069	0.00421274	0.0991533
chrX	16092445	16093633	1189	Peak_13456	608.45	0.738185	0.258166	0.00424523	0.0996381

## Sheet: LL3 damaged vs undamaged
Peak Attributes						Old Undamaged vs. Old Damaged
Chr	Start	End	Width	Peak ID	BaseMean	log2 Fold Change	Standard Error	P Value	Adjusted P Value
chr2L	3090311	3090852	542	Peak_397	414.862	-1.68821	0.212116	1.73535e-15	2.45309e-11
chr2R	5970070	5970582	513	Peak_3159	160.486	-1.57031	0.293355	8.65375e-08	0.000611647
chr3L	7821027	7821628	602	Peak_6184	325.817	-0.941239	0.188923	6.28848e-07	0.00177788
chr2R	2347223	2348349	1127	Peak_2644	559.661	0.993978	0.199422	6.21911e-07	0.00177788
chr2R	17500213	17500877	665	Peak_4684	358.909	-0.828874	0.164354	4.57767e-07	0.00177788
chr2R	5274836	5275387	552	Peak_3058	258.429	-1.35395	0.279247	1.24344e-06	0.00292954
chr3R	19918346	19919176	831	Peak_10588	504.893	-1.32454	0.275985	1.59211e-06	0.00321516
chrX	12401485	12402409	925	Peak_13037	438.16	0.749474	0.161458	3.45203e-06	0.00609974
chr2R	16727066	16727706	641	Peak_4573	237.118	-0.988589	0.218753	6.20739e-06	0.00974974
chrX	1737789	1738552	764	Peak_11774	313.606	-0.747298	0.168686	9.41801e-06	0.012103
chr3R	22310384	22311065	682	Peak_10857	362.463	-0.894661	0.201245	8.76305e-06	0.012103
chr3L	20912669	20914056	1388	Peak_7904	590.551	0.904513	0.20877	1.47367e-05	0.0173599
chr3L	7981526	7982000	475	Peak_6206	230.6	0.927438	0.217912	2.0809e-05	0.0226274
chr3R	26126308	26126702	395	Peak_11262	133.065	1.18069	0.280408	2.54688e-05	0.0257162
chrX	12440080	12440559	480	Peak_13039	224.832	-1.28741	0.312271	3.74394e-05	0.0322196
chr2L	14365810	14366818	1009	Peak_1668	494.16	0.863317	0.209806	3.87474e-05	0.0322196
chrX	18445634	18447153	1520	Peak_13763	1065.91	0.596663	0.144093	3.46065e-05	0.0322196
chrX	4317789	4318509	721	Peak_12130	440.923	-1.11538	0.272105	4.14789e-05	0.0325747
chr2R	8140272	8140688	417	Peak_3482	227.395	-1.13144	0.278723	4.92072e-05	0.0354764
chrX	2939692	2940645	954	Peak_11963	445.419	0.837112	0.206453	5.0193e-05	0.0354764
chrX	20885476	20886216	741	Peak_14026	239.535	-1.07667	0.266939	5.49721e-05	0.0370041
chr2L	6411913	6412430	518	Peak_752	209.841	-1.13712	0.28441	6.38354e-05	0.0379966
chr2R	5276898	5277814	917	Peak_3060	385.704	-0.658038	0.164687	6.45104e-05	0.0379966
chr3L	17557494	17558231	738	Peak_7471	396.054	0.877819	0.219059	6.14367e-05	0.0379966
chr3R	9200484	9201136	653	Peak_9293	277.289	-0.781473	0.198111	7.99241e-05	0.0451923
chr3L	7982142	7982490	349	Peak_6207	120.059	0.952837	0.243023	8.82685e-05	0.0470108
chr2L	4567049	4568084	1036	Peak_548	415.611	0.886619	0.226372	8.97914e-05	0.0470108
chr2R	18909727	18910861	1135	Peak_4861	803.092	-0.839544	0.217613	0.000114334	0.0577223
chr2R	11684688	11685572	885	Peak_3934	354.429	-0.762883	0.198731	0.000123656	0.0602759
chr2L	9567432	9567960	529	Peak_1158	436.383	-0.901095	0.235774	0.000132451	0.0603979
chr3R	10957185	10957893	709	Peak_9517	881.519	-0.760304	0.198553	0.000128549	0.0603979
chrX	15041044	15041718	675	Peak_13334	251.863	-0.844387	0.222943	0.000152192	0.0651934
chr2R	2338181	2338617	437	Peak_2643	204.284	0.972837	0.256356	0.000147724	0.0651934
chrX	19273462	19274222	761	Peak_13890	204.281	-0.828348	0.221183	0.000180334	0.0653641
chr2L	6423189	6423798	610	Peak_753	239.851	-1.02082	0.27162	0.000171099	0.0653641
chr3L	10776042	10776532	491	Peak_6546	138.33	1.16962	0.311871	0.000176597	0.0653641
chr4	1272113	1272696	584	Peak_11565	226.004	1.23587	0.328661	0.000169693	0.0653641
chr2L	1642992	1643992	1001	Peak_231	952.503	-0.675416	0.179889	0.000173605	0.0653641
chrX	5911913	5912753	841	Peak_12303	348.427	1.1348	0.302652	0.000177171	0.0653641
chr4	1276205	1276448	244	Peak_11566	70.6569	1.24477	0.334536	0.000198517	0.0668286
chr3R	806919	807660	742	Peak_8290	340.113	0.986397	0.2651	0.000198557	0.0668286
chr2R	19096431	19097534	1104	Peak_4887	385.672	0.943553	0.252802	0.000189677	0.0668286
chr2L	16534180	16534637	458	Peak_1900	283.829	-0.858113	0.231421	0.000208888	0.0686709
chr2L	21618625	21619307	683	Peak_2415	286.454	-0.847687	0.231214	0.000246143	0.0756408
chrX	19052697	19053507	811	Peak_13845	315.779	1.0788	0.293352	0.000235538	0.0756408
chr2L	21004035	21004816	782	Peak_2348	194.046	0.953061	0.259887	0.000245204	0.0756408
chr3L	18764182	18765278	1097	Peak_7638	999.719	-0.817669	0.223934	0.00026083	0.0784489
chr2L	19951572	19952496	925	Peak_2236	272.089	0.862479	0.240016	0.000326364	0.0961143
chr3L	17026559	17027984	1426	Peak_7424	930.82	-1.08041	0.303367	0.000368899	0.0971141
chr2L	8291985	8292822	838	Peak_1016	468.836	-0.901808	0.252726	0.000359269	0.0971141
chr3R	22896840	22897362	523	Peak_10916	183.469	-0.714832	0.200723	0.000369046	0.0971141
chr3L	4188189	4188638	450	Peak_5803	108.036	-1.06766	0.298596	0.000349405	0.0971141
chr3R	17724504	17724890	387	Peak_10334	122.46	0.848219	0.237052	0.000345976	0.0971141
chr3R	9641949	9642542	594	Peak_9343	217.012	-0.707508	0.198743	0.000370979	0.0971141
chr2R	15032078	15032636	559	Peak_4374	178.761	-0.880871	0.248272	0.000388151	0.099762

## Sheet: Undamaged EL3 vs LL3
Peak Attributes						Young Undamaged vs. Old Undamaged
Chr	Start	End	Width	Peak ID	BaseMean	log2 Fold Change	Standard Error	P Value	Adjusted P Value
chr3L	17957714	17959012	1299	Peak_7528	1395.67	-2.18679	0.295194	1.2824e-13	1.8128e-09
chr2L	14642216	14642755	540	Peak_1746	417.002	-1.79233	0.249414	6.6638e-13	4.70997e-09
chr3L	5120834	5121529	696	Peak_5893	344.075	-1.79405	0.267909	2.13506e-11	1.00604e-07
chr3L	5623550	5624219	670	Peak_5938	940.722	-1.31229	0.199429	4.69665e-11	1.65979e-07
chr2L	14651677	14652412	736	Peak_1747	627.288	-1.71231	0.266225	1.26094e-10	3.56494e-07
chr3R	22901126	22901917	792	Peak_10917	411.286	-1.80537	0.284117	2.09363e-10	4.93258e-07
chr3R	17664459	17665425	967	Peak_10323	922.025	-1.59784	0.253472	2.90412e-10	5.86466e-07
chr2R	15826513	15827831	1319	Peak_4464	995.04	-1.26343	0.202106	4.07e-10	7.19169e-07
chr3L	14603891	14604475	585	Peak_7077	284.841	-1.35278	0.221514	1.01521e-09	1.59455e-06
chr2R	15518842	15519817	976	Peak_4428	598.103	-1.48401	0.24591	1.59192e-09	2.25034e-06
chr3R	19321636	19323000	1365	Peak_10508	872.752	-1.38686	0.232956	2.62728e-09	3.37629e-06
chr2L	21017640	21018873	1234	Peak_2354	1294.05	-1.10351	0.186411	3.22469e-09	3.79868e-06
chr2L	15387722	15389784	2063	Peak_1814	1407.85	-0.986954	0.168259	4.47274e-09	4.86359e-06
chr2L	18468196	18469171	976	Peak_2037	1237.48	-1.80566	0.308609	4.88697e-09	4.93444e-06
chr3R	25025486	25026557	1072	Peak_11087	767.619	-1.54789	0.266208	6.07831e-09	5.37019e-06
chr3R	16494742	16495309	568	Peak_10151	328.62	-1.37488	0.236099	5.7682e-09	5.37019e-06
chr2R	3082324	3083051	728	Peak_2756	600.311	-1.59354	0.275349	7.14967e-09	5.94516e-06
chr3L	8020144	8020963	820	Peak_6214	368.02	-1.18134	0.211345	2.2758e-08	1.78726e-05
chr2L	4340105	4340787	683	Peak_523	430.124	-1.4781	0.265752	2.66796e-08	1.98496e-05
chr2R	20478359	20479792	1434	Peak_5092	898.794	-1.45804	0.262685	2.84808e-08	2.01302e-05
chr3R	10503371	10504092	722	Peak_9475	433.47	-1.46722	0.266764	3.79642e-08	2.23609e-05
chr3L	5614935	5615637	703	Peak_5933	368.128	-1.7885	0.324692	3.62349e-08	2.23609e-05
chr2R	15259856	15261022	1167	Peak_4401	1049.36	-1.1395	0.20707	3.73485e-08	2.23609e-05
chr3R	26087116	26089431	2316	Peak_11250	1782.39	-1.03516	0.187421	3.32917e-08	2.23609e-05
chr2L	5376221	5376917	697	Peak_657	962.248	-0.990596	0.180944	4.38481e-08	2.38399e-05
chr3R	16605560	16606585	1026	Peak_10160	1110.2	-1.4225	0.259689	4.30841e-08	2.38399e-05
chr2R	4081905	4083764	1860	Peak_2907	1544.82	-1.29179	0.238028	5.72918e-08	2.99954e-05
chr3L	16168171	16169502	1332	Peak_7278	938.545	-0.983132	0.18185	6.43469e-08	3.2486e-05
chr2R	18885646	18886739	1094	Peak_4856	1141.44	-1.39596	0.259104	7.13904e-08	3.43045e-05
chr3L	10932780	10934145	1366	Peak_6579	711.008	-1.69379	0.314777	7.40996e-08	3.43045e-05
chr2R	16077085	16078266	1182	Peak_4515	461.17	-1.56422	0.290844	7.52293e-08	3.43045e-05
chr3L	10379643	10380919	1277	Peak_6485	640.698	-1.2281	0.229114	8.31258e-08	3.56081e-05
chr3L	16034201	16035162	962	Peak_7253	702.057	-1.53093	0.285466	8.18933e-08	3.56081e-05
chr3R	9350249	9353046	2798	Peak_9309	1128.85	-1.04195	0.194922	9.01755e-08	3.74918e-05
chr2L	11967853	11969492	1640	Peak_1420	1150.64	-1.14303	0.214598	1.00173e-07	4.04583e-05
chr3R	26514923	26516568	1646	Peak_11296	679.34	-1.53118	0.290514	1.36004e-07	5.34042e-05
chr2R	15844579	15845059	481	Peak_4468	182.349	-1.83984	0.350769	1.56142e-07	5.96548e-05
chr3L	13247932	13249096	1165	Peak_6931	687.471	-1.25392	0.23955	1.65448e-07	6.15468e-05
chr2R	16959488	16961450	1963	Peak_4606	736.813	0.847711	0.162519	1.82768e-07	6.37e-05
chr3R	14620712	14621957	1246	Peak_9959	1208.54	-1.1338	0.217111	1.76766e-07	6.37e-05
chr3L	3074128	3075771	1644	Peak_5628	1305.14	-1.06478	0.204214	1.84755e-07	6.37e-05
chr3R	2514041	2515064	1024	Peak_8504	419.248	-1.45208	0.278826	1.9108e-07	6.43122e-05
chr3R	5786482	5787937	1456	Peak_8946	803.331	-1.62461	0.314051	2.30265e-07	7.56982e-05
chr3L	10844343	10845066	724	Peak_6559	717.572	-1.29914	0.251851	2.49117e-07	7.82561e-05
chr3R	11477279	11478363	1085	Peak_9590	622.028	-1.45346	0.281551	2.43868e-07	7.82561e-05
chr3L	13092914	13094122	1209	Peak_6909	728.515	-1.21167	0.235151	2.56717e-07	7.88902e-05
chr3R	27329601	27331882	2282	Peak_11377	1873.55	-1.05683	0.205845	2.83467e-07	8.52571e-05
chr2L	15742886	15744438	1553	Peak_1835	1411.44	-0.843127	0.164376	2.90894e-07	8.56684e-05
chr2R	6957664	6958719	1056	Peak_3286	551.91	-1.08	0.211668	3.35478e-07	9.67819e-05
chr3R	21271499	21272806	1308	Peak_10740	661.49	-1.45414	0.28552	3.52531e-07	9.95772e-05
chr2L	13043881	13044589	709	Peak_1531	662.032	-1.57639	0.309742	3.59256e-07	9.95772e-05
chr3L	17604638	17605672	1035	Peak_7488	1215.2	-1.41914	0.279074	3.6733e-07	9.98572e-05
chrX	4069699	4070801	1103	Peak_12107	528.233	-1.2819	0.253429	4.23194e-07	0.000112873
chr2L	18664667	18666318	1652	Peak_2068	1057.07	-0.982217	0.195273	4.90577e-07	0.000128422
chr2R	2007735	2008966	1232	Peak_2605	1078.49	-1.29403	0.258476	5.54625e-07	0.000142549
chr2R	7517044	7517744	701	Peak_3391	552.824	-1.43979	0.287948	5.72784e-07	0.000144587
chr3L	15259122	15259759	638	Peak_7176	402.562	-1.50114	0.300959	6.10532e-07	0.000151412
chr2L	14506600	14507495	896	Peak_1703	444.885	-1.51298	0.304137	6.53587e-07	0.000158925
chr3R	2041043	2041782	740	Peak_8456	553.91	-1.03987	0.209154	6.63311e-07	0.000158925
chrX	1467967	1469486	1520	Peak_11749	1944.29	-1.08266	0.218	6.82304e-07	0.000160751
chr3L	8694446	8695753	1308	Peak_6316	909.708	-1.03783	0.209173	6.99158e-07	0.000162021
chr3L	21887600	21888415	816	Peak_8060	654.986	-1.61728	0.327041	7.60723e-07	0.000170677
chrX	1503964	1510033	6070	Peak_11752	4469.94	-0.967125	0.195608	7.64575e-07	0.000170677
chr3R	25102822	25104454	1633	Peak_11105	979.462	-1.35165	0.273495	7.72729e-07	0.000170677
chr2L	2164437	2165446	1010	Peak_288	1068.95	-1.05863	0.214593	8.08926e-07	0.000175923
chr2R	17362155	17363809	1655	Peak_4652	2315.09	-0.995573	0.202877	9.23557e-07	0.000197171
chr2R	15852644	15853831	1188	Peak_4471	467.868	-1.00037	0.203953	9.34805e-07	0.000197171
chr3R	17731004	17732057	1054	Peak_10337	428.416	-1.00783	0.205593	9.48472e-07	0.000197171
chr3R	23240857	23241798	942	Peak_10962	401.369	-1.48331	0.303378	1.01194e-06	0.00019879
chr3R	19297797	19298851	1055	Peak_10505	1909.27	-0.816088	0.166917	1.01252e-06	0.00019879
chr3L	10968717	10971029	2313	Peak_6593	657.292	-1.39086	0.284458	1.01081e-06	0.00019879
chr3L	13085887	13087227	1341	Peak_6906	448.472	-1.07376	0.219519	1.00119e-06	0.00019879
chrX	4919144	4921462	2319	Peak_12203	747.354	-1.39978	0.2874	1.11322e-06	0.000213781
chr3R	6327886	6328587	702	Peak_9007	327.938	-1.483	0.304553	1.11912e-06	0.000213781
chr3R	11849098	11850275	1178	Peak_9617	588.468	-1.39322	0.286401	1.14696e-06	0.000216178
chrX	1845055	1846480	1426	Peak_11795	1131.27	-1.33262	0.274366	1.19113e-06	0.000216479
chr2L	5231566	5232610	1045	Peak_629	635.812	-1.37356	0.282788	1.19055e-06	0.000216479
chr3R	21031055	21031841	787	Peak_10722	987.388	-0.917878	0.189069	1.2055e-06	0.000216479
chr2R	5681882	5683236	1355	Peak_3108	520.655	-1.1177	0.230263	1.20981e-06	0.000216479
chr2R	20193046	20194255	1210	Peak_5047	1077.4	-1.10219	0.227687	1.29311e-06	0.000228492
chr2R	15534464	15535360	897	Peak_4429	640.675	-0.791292	0.163752	1.34986e-06	0.00023023
chr2L	16406394	16407391	998	Peak_1878	349.296	-1.17237	0.242626	1.3518e-06	0.00023023
chr2R	5561840	5563435	1596	Peak_3097	794.177	-0.917087	0.18964	1.32518e-06	0.00023023
chr3L	18004573	18005714	1142	Peak_7546	501.524	-1.38774	0.287534	1.3906e-06	0.000234018
chr3R	14613724	14614926	1203	Peak_9958	841.029	-1.35079	0.280054	1.41183e-06	0.000234795
chr2R	14470674	14471381	708	Peak_4301	302.714	-1.42258	0.296221	1.56767e-06	0.000257681
chr3L	3250211	3250785	575	Peak_5664	271.313	1.254	0.261757	1.66184e-06	0.00027002
chr3L	5625675	5627774	2100	Peak_5939	1824.07	-1.02374	0.214401	1.79789e-06	0.000275065
chr3L	7780835	7781509	675	Peak_6178	463.394	-1.2441	0.261033	1.87865e-06	0.000275065
chr3R	11288864	11290304	1441	Peak_9568	701.681	-1.09473	0.229256	1.79595e-06	0.000275065
chrX	16824174	16825467	1294	Peak_13557	538.805	-1.20519	0.252094	1.74672e-06	0.000275065
chr3L	813360	814312	953	Peak_5354	377.463	-1.47285	0.308862	1.85489e-06	0.000275065
chr3L	22172096	22173494	1399	Peak_8087	929.858	-1.20368	0.251604	1.71826e-06	0.000275065
chr2L	12601590	12602218	629	Peak_1492	354.106	-1.45437	0.304552	1.79297e-06	0.000275065
chr3R	19333355	19335058	1704	Peak_10512	785.637	-1.05007	0.220094	1.83302e-06	0.000275065
chr3L	3244679	3245958	1280	Peak_5662	951.992	-1.38143	0.289862	1.88079e-06	0.000275065
chr3R	14311317	14311963	647	Peak_9934	357.316	-1.48597	0.311844	1.88747e-06	0.000275065
chr2R	17620976	17622703	1728	Peak_4707	1533.35	-1.02878	0.216136	1.93722e-06	0.000279435
chr3L	17965365	17966620	1256	Peak_7531	1110.59	-1.30813	0.275338	2.02411e-06	0.000283295
chr3L	14603243	14603749	507	Peak_7076	212.224	-1.30773	0.275053	1.98992e-06	0.000283295
chrX	2878674	2879754	1081	Peak_11951	832.076	-0.996991	0.209796	2.01233e-06	0.000283295
chr3L	15258061	15258559	499	Peak_7175	332.247	-1.23912	0.261025	2.06312e-06	0.000285924
chr2L	14023621	14024888	1268	Peak_1640	1342.66	-1.32026	0.278836	2.19163e-06	0.000300785
chr3R	19740022	19741865	1844	Peak_10557	909.189	-1.10007	0.232685	2.27061e-06	0.000308629
chr2L	21863399	21864026	628	Peak_2454	446.184	-0.896105	0.189638	2.29734e-06	0.000309287
chrX	1455636	1457368	1733	Peak_11746	1671.5	-0.905002	0.191612	2.32289e-06	0.000309778
chr2R	7726806	7727830	1025	Peak_3428	634.25	-1.08648	0.230701	2.48356e-06	0.000328109
chr3R	492581	493995	1415	Peak_8241	780.721	-1.38358	0.294236	2.57285e-06	0.000335584
chr3L	1827774	1828497	724	Peak_5489	459.176	-1.54305	0.328232	2.58762e-06	0.000335584
chr3R	16108209	16109091	883	Peak_10114	580.879	-1.20372	0.256332	2.65405e-06	0.000341069
chr2R	9640917	9641580	664	Peak_3667	349.529	-0.958219	0.205131	2.99372e-06	0.000381254
chr3L	16166916	16167939	1024	Peak_7277	821.756	-1.0873	0.232895	3.03244e-06	0.000382737
chr3L	18233464	18234812	1349	Peak_7602	1985.14	-1.13563	0.243413	3.07929e-06	0.000385211
chr3R	10101340	10102074	735	Peak_9407	492.403	-1.18919	0.255139	3.14757e-06	0.000390299
chr3L	12106374	12106879	506	Peak_6762	333.458	-1.15594	0.248442	3.27514e-06	0.000400176
chr3R	12348945	12349928	984	Peak_9734	380.23	-1.16486	0.250388	3.28384e-06	0.000400176
chr2L	13955684	13956360	677	Peak_1633	454.907	-1.37472	0.296078	3.43206e-06	0.000414664
chr3L	7986710	7987607	898	Peak_6210	768.214	-1.07668	0.232973	3.8101e-06	0.00044883
chr2L	18465164	18466386	1223	Peak_2034	730.352	-1.48468	0.321147	3.78147e-06	0.00044883
chr3L	3512541	3513095	555	Peak_5712	369.952	-1.49971	0.324499	3.80771e-06	0.00044883
chr3L	6295399	6296361	963	Peak_6015	264.549	-1.0554	0.228741	3.951e-06	0.000457577
chrX	16099633	16100255	623	Peak_13457	240.908	-1.30904	0.283812	3.98146e-06	0.000457577
chr3L	50761	51343	583	Peak_5188	354.397	-1.2953	0.280714	3.94432e-06	0.000457577
chr3L	5779651	5780260	610	Peak_5949	290.557	-1.03782	0.22529	4.09371e-06	0.000466683
chr2R	15507148	15508058	911	Peak_4425	623.738	-0.933918	0.202912	4.17314e-06	0.000471932
chr2L	12013186	12014389	1204	Peak_1428	2075.81	-1.28449	0.279657	4.36758e-06	0.000490001
chr2L	499557	500386	830	Peak_82	429.314	-1.27626	0.277981	4.40734e-06	0.000490568
chrX	7229225	7230207	983	Peak_12479	724.809	-1.02615	0.224367	4.79552e-06	0.0005255
chr3L	17559529	17560456	928	Peak_7473	519.96	-1.03995	0.227323	4.76694e-06	0.0005255
chr3R	2247169	2247804	636	Peak_8487	272.034	-1.44097	0.315487	4.93684e-06	0.000532591
chr3R	6342457	6344723	2267	Peak_9009	1021.37	-1.32538	0.290275	4.97299e-06	0.000532591
chr2L	11384148	11385661	1514	Peak_1381	551.955	-1.25178	0.274276	5.02038e-06	0.000532591
chr3L	4727628	4728132	505	Peak_5883	203.348	-1.41245	0.309433	5.00383e-06	0.000532591
chrX	9921325	9922030	706	Peak_12787	288.935	-1.53106	0.335555	5.04862e-06	0.000532591
chr3R	6325294	6326004	711	Peak_9006	219.261	-1.41813	0.312094	5.52188e-06	0.000573951
chr2R	13323738	13325349	1612	Peak_4126	973.945	-1.30804	0.287803	5.49582e-06	0.000573951
chr3L	4999316	5000144	829	Peak_5890	223.588	-1.5903	0.350583	5.72899e-06	0.000591131
chr2R	12608619	12609215	597	Peak_4053	388.211	-1.06582	0.235223	5.86813e-06	0.000596776
chr3L	18057725	18058309	585	Peak_7559	511.797	-1.32661	0.292772	5.86432e-06	0.000596776
chr2R	2434439	2435521	1083	Peak_2665	595.364	-1.17326	0.259548	6.17273e-06	0.000618849
chrX	3575900	3576920	1021	Peak_12041	407.739	-1.39567	0.308702	6.15225e-06	0.000618849
chr2R	4951042	4952726	1685	Peak_3017	584.801	-1.22903	0.271994	6.22534e-06	0.000619728
chr2L	11870671	11871596	926	Peak_1414	257.424	-1.36241	0.30178	6.3447e-06	0.000627194
chr2R	12699833	12700291	459	Peak_4065	156.118	-1.61102	0.356968	6.38942e-06	0.000627228
chr2R	13723224	13724425	1202	Peak_4191	386.503	-1.29239	0.286805	6.60027e-06	0.000642527
chr2L	21860535	21861141	607	Peak_2453	272.118	-1.50863	0.334877	6.63617e-06	0.000642527
chr2L	19916897	19917492	596	Peak_2227	419.899	-0.839642	0.187042	7.1536e-06	0.000671084
chr3L	5620764	5621548	785	Peak_5936	641.32	-1.17338	0.261489	7.21244e-06	0.000671084
chr3R	11744894	11746237	1344	Peak_9605	1620.91	-0.915013	0.203908	7.21041e-06	0.000671084
chr2L	9198145	9198920	776	Peak_1125	427.701	-1.33343	0.297162	7.21596e-06	0.000671084
chr3R	19773945	19775414	1470	Peak_10570	1219.08	-0.727102	0.161922	7.1078e-06	0.000671084
chr2R	15307690	15308703	1014	Peak_4404	518.492	-1.01188	0.225219	7.02747e-06	0.000671084
chr3L	6435439	6436275	837	Peak_6042	334.636	-1.36442	0.304396	7.38082e-06	0.000677468
chr2L	18647905	18648469	565	Peak_2065	178.218	-1.49407	0.333523	7.4763e-06	0.000677468
chr2L	18121330	18122626	1297	Peak_2005	515.798	-1.31226	0.292873	7.44226e-06	0.000677468
chr2L	4820539	4822656	2118	Peak_576	914.733	-1.18706	0.264831	7.3829e-06	0.000677468
chr2L	16686429	16687220	792	Peak_1924	967.61	-0.939183	0.209883	7.64865e-06	0.000686402
chrX	5867273	5868721	1449	Peak_12285	509.409	-1.43871	0.321562	7.67201e-06	0.000686402
chr3R	17959935	17960648	714	Peak_10359	367.214	1.1006	0.246344	7.90526e-06	0.000702823
chr3R	886183	887503	1321	Peak_8313	1181.14	-1.03826	0.232541	8.01317e-06	0.000703567
chr3L	16188249	16189235	987	Peak_7288	1354.89	-1.35193	0.302786	8.00823e-06	0.000703567
chr2L	11022936	11024629	1694	Peak_1321	1851.08	-1.00285	0.22478	8.14057e-06	0.00070836
chr3L	14971430	14972061	632	Peak_7115	932.771	-0.811273	0.181923	8.21809e-06	0.00070836
chr2L	2201920	2203777	1858	Peak_300	2027.41	-1.72769	0.387405	8.2092e-06	0.00070836
chrX	14375070	14376423	1354	Peak_13265	1532.72	-0.870561	0.19553	8.49519e-06	0.000727806
chr2R	19140185	19140873	689	Peak_4897	222.087	-1.42362	0.320544	8.94314e-06	0.000761568
chrX	19780851	19782165	1315	Peak_13970	2054.73	-0.930268	0.209735	9.18848e-06	0.000777774
chr2L	8086731	8087165	435	Peak_990	158.902	1.28205	0.289663	9.59972e-06	0.000807748
chr2L	8846539	8847380	842	Peak_1087	725.441	-1.02297	0.231523	9.94256e-06	0.000829764
chr2L	2908623	2909166	544	Peak_373	278.972	-1.20425	0.2726	9.97877e-06	0.000829764
chr3L	3536684	3537413	730	Peak_5716	769.179	-1.12772	0.255464	1.0129e-05	0.000837333
chr2R	1773220	1773705	486	Peak_2577	157.904	-1.30391	0.295953	1.0539e-05	0.000866155
chr2L	3004204	3005109	906	Peak_388	398.243	-1.02608	0.233154	1.0782e-05	0.000881004
chr2R	12963452	12964498	1047	Peak_4093	471.836	-0.901404	0.204997	1.0968e-05	0.000891058
chr3L	10921381	10922376	996	Peak_6577	276.382	-1.18698	0.270131	1.1124e-05	0.000898562
chr2L	1062121	1064207	2087	Peak_164	2306.63	-0.842311	0.192109	1.16225e-05	0.000928224
chr3L	10896910	10897514	605	Peak_6569	265.612	-1.14384	0.260846	1.15929e-05	0.000928224
chr2R	6101211	6101992	782	Peak_3180	1072.17	-1.18536	0.270847	1.20615e-05	0.00095252
chr2L	1485973	1486964	992	Peak_215	457.467	-0.981315	0.224185	1.20179e-05	0.00095252
chr3L	18183313	18184318	1006	Peak_7581	730.276	-1.11791	0.255861	1.24696e-05	0.00097928
chr2R	13386763	13387959	1197	Peak_4136	710.796	0.984683	0.225833	1.29931e-05	0.00099281
chr2R	19127359	19128638	1280	Peak_4894	1244.72	-1.04834	0.240387	1.29427e-05	0.00099281
chrX	1865458	1866862	1405	Peak_11800	915.174	-0.920816	0.211118	1.29098e-05	0.00099281
chr3L	16967130	16967694	565	Peak_7409	236.777	-1.30075	0.298221	1.2905e-05	0.00099281
chrX	1445451	1446405	955	Peak_11744	424.351	-1.22869	0.281768	1.29688e-05	0.00099281
chr2R	8858231	8858715	485	Peak_3578	186.887	1.53433	0.352049	1.31095e-05	0.000996322
chr3L	17026559	17027984	1426	Peak_7424	930.82	1.32278	0.30395	1.34933e-05	0.00102001
chr2R	11795009	11796302	1294	Peak_3957	529.364	-1.26524	0.290849	1.36033e-05	0.00102285
chr3L	3513308	3514591	1284	Peak_5713	559.514	-1.24184	0.286123	1.4233e-05	0.00106454
chrX	3367710	3369532	1823	Peak_12030	1647.74	-0.787725	0.181581	1.43682e-05	0.00106537
chrX	16800011	16800441	431	Peak_13554	152.802	-1.22671	0.282799	1.43948e-05	0.00106537
chr2L	9986141	9987568	1428	Peak_1217	618.546	-1.33979	0.309046	1.45603e-05	0.001072
chr2L	1470314	1471381	1068	Peak_211	351.508	-1.09495	0.252724	1.47347e-05	0.0010761
chrX	15535207	15536635	1429	Peak_13378	846.249	-1.26283	0.291503	1.47682e-05	0.0010761
chr3L	10351823	10352485	663	Peak_6480	214.646	-1.43342	0.331217	1.50644e-05	0.00109205
chr3L	5604592	5605577	986	Peak_5929	899.558	-0.805141	0.186322	1.55157e-05	0.00111903
chr3L	801863	803219	1357	Peak_5349	631.929	-1.33193	0.308337	1.56221e-05	0.00112098
chr3R	17869570	17870707	1138	Peak_10353	957.501	-0.884132	0.204795	1.58046e-05	0.00112835
chr3R	10201364	10202335	972	Peak_9429	585.793	-1.15498	0.268194	1.65839e-05	0.00117804
chr2L	18002864	18004106	1243	Peak_1999	671.864	-0.730289	0.169806	1.70238e-05	0.00119726
chr3L	1391709	1392690	982	Peak_5427	386.04	-0.956925	0.222451	1.69474e-05	0.00119726
chr3L	660005	661433	1429	Peak_5305	794.473	-1.23997	0.288798	1.75833e-05	0.00123048
chr2R	16098080	16098583	504	Peak_4521	138.837	-1.25078	0.291396	1.76768e-05	0.00123094
chr2L	15280470	15281558	1089	Peak_1789	318.915	-1.20766	0.281656	1.80517e-05	0.00125088
chr3R	12101760	12102191	432	Peak_9684	196.324	1.25894	0.294772	1.94693e-05	0.00132027
chr2L	1689178	1689880	703	Peak_242	273.911	1.34037	0.313934	1.95836e-05	0.00132027
chr3L	1095326	1097431	2106	Peak_5383	861.43	-0.945492	0.221466	1.96136e-05	0.00132027
chr2R	9880673	9882650	1978	Peak_3703	2922.83	-0.968026	0.226526	1.92557e-05	0.00132027
chr3R	23025996	23028139	2144	Peak_10938	1613.6	-1.0287	0.240834	1.94237e-05	0.00132027
chr3L	5546672	5547285	614	Peak_5918	407.861	-1.12994	0.264618	1.95388e-05	0.00132027
chr2R	11016638	11017673	1036	Peak_3857	839.486	0.973158	0.228204	2.00423e-05	0.00133013
chr3L	17231093	17231798	706	Peak_7431	458.142	-1.13264	0.265555	1.99751e-05	0.00133013
chr3R	6458941	6460225	1285	Peak_9039	526.531	-1.32112	0.309648	1.98554e-05	0.00133013
chr3R	19649237	19649867	631	Peak_10545	203.84	-1.13678	0.266646	2.01473e-05	0.00133085
chr3L	2487381	2489040	1660	Peak_5561	1092.76	-0.695507	0.16328	2.04801e-05	0.00134543
chr3L	14445906	14446828	923	Peak_7054	391.735	-1.17171	0.27513	2.05583e-05	0.00134543
chr2L	14569569	14570092	524	Peak_1728	188.67	-1.16886	0.274615	2.07769e-05	0.00135346
chr2R	15162767	15163289	523	Peak_4392	280.815	-1.31064	0.308083	2.09811e-05	0.0013605
chrX	7428524	7429687	1164	Peak_12488	614.397	-1.00426	0.236278	2.13457e-05	0.00137782
chr2R	14810975	14811751	777	Peak_4358	321.17	-0.961465	0.226422	2.17282e-05	0.00139613
chr3L	7623105	7624168	1064	Peak_6166	407.679	-1.13034	0.266269	2.18496e-05	0.00139758
chr2R	16916876	16917929	1054	Peak_4597	642.318	-1.26625	0.29872	2.24615e-05	0.00143025
chrX	3301521	3303422	1902	Peak_12017	2339.06	-0.993554	0.234865	2.33362e-05	0.00147005
chr2R	2973411	2974518	1108	Peak_2737	1258.18	-0.77197	0.182442	2.32323e-05	0.00147005
chr2L	847553	848890	1338	Peak_151	1484.2	-1.08235	0.255949	2.34981e-05	0.00147005
chrX	7871121	7872154	1034	Peak_12551	373.763	-1.235	0.29205	2.35025e-05	0.00147005
chr2L	14571188	14572223	1036	Peak_1729	443.979	-1.61792	0.382871	2.38147e-05	0.00148301
chr2R	18901934	18902546	613	Peak_4858	267.997	-1.13084	0.267835	2.41963e-05	0.00150017
chr2L	14207377	14208086	710	Peak_1648	434.07	-1.24597	0.295221	2.43807e-05	0.001505
chrX	10703563	10704657	1095	Peak_12872	385.522	1.21106	0.287307	2.49552e-05	0.00153377
chrX	87619	88574	956	Peak_11574	607.143	1.32827	0.315411	2.53975e-05	0.0015421
chr3L	4708078	4708543	466	Peak_5878	168.01	-1.30745	0.310352	2.52212e-05	0.0015421
chr3L	12908805	12909244	440	Peak_6883	196.048	-1.43979	0.341907	2.5418e-05	0.0015421
chr3R	24362109	24363416	1308	Peak_11019	1861.75	-0.73942	0.176108	2.68492e-05	0.00158938
chr2R	11622273	11623654	1382	Peak_3928	1579.87	-0.757868	0.180308	2.63193e-05	0.00158938
chr3L	4352529	4353439	911	Peak_5836	356.158	-1.22516	0.291641	2.65862e-05	0.00158938
chr2R	8550442	8550981	540	Peak_3535	191.786	-1.40534	0.334427	2.64306e-05	0.00158938
chrX	13967239	13968736	1498	Peak_13239	301.829	-1.33334	0.317559	2.68441e-05	0.00158938
chrX	16822575	16823005	431	Peak_13556	172.47	-1.16657	0.277855	2.6872e-05	0.00158938
chrX	14521245	14522028	784	Peak_13273	231.235	-1.24778	0.297641	2.76245e-05	0.00161489
chr2R	16101209	16102378	1170	Peak_4522	329.599	-1.31512	0.313693	2.7602e-05	0.00161489
chr2R	9917457	9918138	682	Peak_3714	485.884	-1.04217	0.248607	2.76459e-05	0.00161489
chr2R	19181051	19182196	1146	Peak_4900	322.798	-1.39405	0.332693	2.78727e-05	0.00162143
chr3L	14296182	14297458	1277	Peak_7031	763.02	-0.889611	0.212459	2.82407e-05	0.00163611
chrX	19770802	19771608	807	Peak_13968	492.712	-0.914004	0.218466	2.86748e-05	0.00165448
chr3R	14976699	14977456	758	Peak_10002	377.586	-0.933273	0.223145	2.88509e-05	0.00165787
chrX	1837097	1838830	1734	Peak_11793	659.44	-1.21733	0.291288	2.92625e-05	0.00167471
chr2L	17702229	17702929	701	Peak_1984	380.721	-0.8882	0.212713	2.9724e-05	0.00168746
chrX	18101909	18102600	692	Peak_13713	225.827	-1.30732	0.313023	2.96127e-05	0.00168746
chr2L	7104191	7105273	1083	Peak_857	320.226	-1.42034	0.340299	2.99569e-05	0.00169388
chr2L	4361352	4362220	869	Peak_526	307.468	-1.25919	0.302445	3.1359e-05	0.0017661
chr3R	25286131	25287358	1228	Peak_11121	529.896	-1.15429	0.27762	3.2133e-05	0.00180251
chr3L	17612243	17612754	512	Peak_7491	342.044	-1.14982	0.276648	3.23517e-05	0.0018076
chr3L	16357387	16357919	533	Peak_7314	160.813	-1.18595	0.285591	3.28684e-05	0.00182924
chr3R	2226719	2227566	848	Peak_8480	668.161	-0.880057	0.212766	3.53018e-05	0.00194174
chr3L	5622961	5623375	415	Peak_5937	184.536	-1.1237	0.271569	3.50633e-05	0.00194174
chrX	7437445	7438112	668	Peak_12492	359.502	-1.06728	0.258008	3.52476e-05	0.00194174
chrX	17389643	17389974	332	Peak_13619	131.914	1.29144	0.312371	3.55997e-05	0.00195053
chr3L	21232839	21233644	806	Peak_7960	1013.74	-0.941431	0.228023	3.64875e-05	0.00199146
chr2R	15709772	15710500	729	Peak_4444	403.196	-1.27979	0.310282	3.71367e-05	0.0020191
chr3L	22344112	22345263	1152	Peak_8099	800.397	-1.07023	0.259604	3.74724e-05	0.00202344
chrX	18570251	18571281	1031	Peak_13783	508.005	-1.29452	0.314024	3.75029e-05	0.00202344
chr3L	8029483	8030257	775	Peak_6216	310.852	-1.21598	0.295376	3.84317e-05	0.00206567
chr3L	17658256	17659000	745	Peak_7500	502.686	-0.9494	0.230783	3.89151e-05	0.00208373
chr2L	1399352	1400023	672	Peak_190	328.546	-1.02633	0.249555	3.91132e-05	0.00208643
chr3L	3784851	3786136	1286	Peak_5749	780.998	-0.916011	0.222897	3.96398e-05	0.00208977
chr2R	2675783	2676917	1135	Peak_2709	948.291	-0.820556	0.199706	3.97671e-05	0.00208977
chr3R	22657818	22658890	1073	Peak_10879	610.816	-0.730859	0.177798	3.94611e-05	0.00208977
chr3L	1592763	1593483	721	Peak_5459	373.165	-1.17443	0.285763	3.95983e-05	0.00208977
chrX	11455525	11456083	559	Peak_12948	159.945	1.13024	0.27555	4.10015e-05	0.00214415
chrX	6237037	6238547	1511	Peak_12343	1008.42	-0.954493	0.232736	4.11053e-05	0.00214415
chr2R	6659068	6661269	2202	Peak_3248	818.715	-1.16777	0.284974	4.17095e-05	0.00216767
chr2R	11112680	11114306	1627	Peak_3869	783.427	-0.999137	0.244102	4.25617e-05	0.00220385
chr2R	2407534	2408695	1162	Peak_2655	486.673	-1.00574	0.245788	4.27879e-05	0.00220748
chr2R	7899773	7900820	1048	Peak_3451	269.847	-1.30553	0.319345	4.34831e-05	0.00223519
chr3L	2805424	2806399	976	Peak_5590	473.568	-1.0933	0.267659	4.41398e-05	0.00226073
chr2R	15974798	15975466	669	Peak_4490	331.84	-1.22634	0.300349	4.44517e-05	0.00226848
chr2L	15910778	15912869	2092	Peak_1847	2343.21	-1.00686	0.246695	4.47644e-05	0.00227622
chr2R	14813746	14814693	948	Peak_4360	333.274	1.23649	0.303095	4.51213e-05	0.00228615
chr2L	13150879	13151090	212	Peak_1552	87.5833	1.30874	0.320993	4.55915e-05	0.00229353
chrX	2113103	2113360	258	Peak_11846	94.9041	1.07563	0.263781	4.54762e-05	0.00229353
chrX	8937921	8938299	379	Peak_12671	131.655	1.18806	0.291801	4.67189e-05	0.00233337
chr2R	14460207	14461225	1019	Peak_4300	464.582	-0.917987	0.225616	4.72544e-05	0.00233337
chrX	20110384	20111642	1259	Peak_13988	1409.15	-0.842715	0.207018	4.68635e-05	0.00233337
chr2R	14686626	14687598	973	Peak_4334	681.269	-0.886622	0.217878	4.71431e-05	0.00233337
chr3L	6831299	6831786	488	Peak_6081	192.008	-0.826755	0.203223	4.73739e-05	0.00233337
chrX	11672660	11673485	826	Peak_12978	330.11	-1.30971	0.321792	4.70018e-05	0.00233337
chr2R	16036584	16037655	1072	Peak_4501	508.711	-1.05761	0.260133	4.78967e-05	0.00235093
chrX	10702508	10703161	654	Peak_12871	354.459	1.1677	0.287608	4.90615e-05	0.00239977
chr2R	16394700	16395735	1036	Peak_4542	270.627	-1.28717	0.317331	4.98679e-05	0.0024308
chr3R	22874243	22874931	689	Peak_10914	259.597	-1.13111	0.279284	5.12079e-05	0.00247084
chr2R	12983221	12983788	568	Peak_4099	486.34	-0.833777	0.20587	5.12136e-05	0.00247084
chr2L	21770249	21771040	792	Peak_2432	346.497	-1.0358	0.255722	5.11158e-05	0.00247084
chr2L	3338508	3339918	1411	Peak_411	437.087	-1.2258	0.303094	5.2481e-05	0.00251482
chrX	13829949	13830760	812	Peak_13219	297.04	-1.32166	0.326736	5.23143e-05	0.00251482
chrX	15056384	15057598	1215	Peak_13337	1121.17	-0.642991	0.159026	5.27032e-05	0.00251693
chr3L	21793422	21794008	587	Peak_8041	389.675	-1.04877	0.259712	5.38617e-05	0.00253796
chr3L	10324670	10325705	1036	Peak_6474	577.56	-1.18159	0.292529	5.36263e-05	0.00253796
chr3L	1456890	1458251	1362	Peak_5437	582.554	-1.00257	0.248234	5.37193e-05	0.00253796
chr4	850314	850823	510	Peak_11534	199.926	-1.23831	0.306569	5.36225e-05	0.00253796
chr3L	10768689	10771620	2932	Peak_6545	3312.77	-0.818834	0.202948	5.46731e-05	0.00256764
chrX	2990633	2991603	971	Peak_11974	519.587	-0.882255	0.219199	5.7e-05	0.00265925
chr2R	13720929	13722015	1087	Peak_4189	978.989	-0.915422	0.227414	5.68882e-05	0.00265925
chr3L	14341060	14341702	643	Peak_7039	349.986	-1.12232	0.27907	5.77904e-05	0.00268725
chr2L	11219277	11220263	987	Peak_1355	528.358	-0.727157	0.180977	5.87051e-05	0.00272084
chr2R	16158192	16158966	775	Peak_4530	292.982	1.18939	0.296226	5.94132e-05	0.00274466
chr3R	26668325	26669634	1310	Peak_11323	1074.4	-0.814244	0.202932	6.01069e-05	0.00276766
chr3R	4794791	4795812	1022	Peak_8798	672.436	-1.03061	0.257021	6.07601e-05	0.00278865
chr2L	14995392	14996171	780	Peak_1769	806.275	-0.816155	0.203619	6.11695e-05	0.0027899
chr2R	6954101	6954914	814	Peak_3284	202.01	-0.941146	0.234805	6.11821e-05	0.0027899
chr3L	12825368	12826149	782	Peak_6879	1069.46	-0.829423	0.207013	6.15907e-05	0.00279951
chr3R	24507461	24508916	1456	Peak_11035	1003.84	-0.820669	0.204981	6.23778e-05	0.0028262
chr3R	26592648	26593291	644	Peak_11306	694.694	-0.889295	0.222281	6.31357e-05	0.00284464
chr3R	9619983	9620907	925	Peak_9338	672.041	-0.818766	0.2047	6.33886e-05	0.00284464
chr3L	20118982	20119570	589	Peak_7800	354.334	-1.01027	0.252532	6.31974e-05	0.00284464
chr3L	8768069	8768751	683	Peak_6329	449.321	-1.10243	0.275683	6.36353e-05	0.00284667
chr3L	15000858	15001779	922	Peak_7121	356.67	-1.15311	0.288793	6.52798e-05	0.00291103
chr2R	7284690	7285729	1040	Peak_3340	673.794	-1.07419	0.269224	6.6092e-05	0.0029295
chr3R	5738656	5739477	822	Peak_8940	260.458	-1.16668	0.29241	6.61087e-05	0.0029295
chr2L	5739007	5739602	596	Peak_686	250.686	-1.03795	0.260282	6.66927e-05	0.00294615
chr3R	21827898	21829459	1562	Peak_10798	3211.83	-0.829767	0.20826	6.76828e-05	0.00298057
chr2R	15696501	15697310	810	Peak_4441	300.43	-0.998654	0.250827	6.84963e-05	0.00300703
chr2L	1431228	1431915	688	Peak_199	257.697	-1.15016	0.289177	6.96813e-05	0.00304017
chr3R	26109597	26111402	1806	Peak_11258	1290.93	-1.1082	0.278585	6.95103e-05	0.00304017
chrX	14582385	14582935	551	Peak_13277	195.27	-1.11647	0.280937	7.06455e-05	0.00307275
chrX	12139855	12141046	1192	Peak_13027	647.479	-0.97529	0.245614	7.16233e-05	0.00310573
chr3L	4119041	4119373	333	Peak_5787	122.667	1.04662	0.263826	7.27612e-05	0.00313722
chr3L	6285802	6286455	654	Peak_6013	286.878	-0.752491	0.189689	7.27934e-05	0.00313722
chr3L	10321556	10322416	861	Peak_6472	193.106	-1.21225	0.305709	7.32788e-05	0.003139
chr3R	27122278	27123834	1557	Peak_11354	494.791	-1.07526	0.271114	7.30674e-05	0.003139
chr2R	16053175	16053712	538	Peak_4507	208.706	-1.3392	0.338039	7.4424e-05	0.00317761
chr3R	22859928	22860517	590	Peak_10911	234.862	-1.0236	0.258417	7.46297e-05	0.00317761
chr3L	2846885	2849008	2124	Peak_5603	1328.07	-0.906182	0.22885	7.50362e-05	0.00318532
chr2L	7573063	7574984	1922	Peak_924	1146.1	-0.878534	0.221969	7.5607e-05	0.00319994
chr3L	16150496	16151890	1395	Peak_7271	743.384	1.20363	0.304569	7.75263e-05	0.00327138
chr3L	10343702	10344652	951	Peak_6478	472.278	-0.887312	0.224648	7.8222e-05	0.00328114
chr2R	7591515	7592745	1231	Peak_3409	418.35	-1.11483	0.282234	7.81425e-05	0.00328114
chr3R	21467061	21467614	554	Peak_10769	244.171	1.09729	0.277922	7.87456e-05	0.00329334
chr3R	4973238	4973839	602	Peak_8825	224.267	-1.29623	0.328646	8.00842e-05	0.00333944
chr2L	11959330	11960224	895	Peak_1416	333.013	-1.13076	0.287024	8.162e-05	0.00339347
chr3L	18006017	18006996	980	Peak_7547	2038.3	-1.0965	0.278455	8.22305e-05	0.00340883
chr2L	7898327	7900236	1910	Peak_959	1111.15	-1.06991	0.271973	8.35794e-05	0.00345461
chr3R	512481	513770	1290	Peak_8243	1032.26	0.920987	0.234177	8.39381e-05	0.00345933
chr3R	19337219	19338196	978	Peak_10513	414.923	-1.11386	0.283295	8.43104e-05	0.00346252
chr2R	14829598	14830228	631	Peak_4362	231.601	-1.37451	0.349637	8.45055e-05	0.00346252
chr2R	14058678	14060069	1392	Peak_4218	553.249	0.710628	0.180834	8.50426e-05	0.00347446
chrX	18184783	18185572	790	Peak_13733	325.887	-1.05545	0.268836	8.63682e-05	0.00349828
chr2L	9210760	9211905	1146	Peak_1129	628.874	-1.0817	0.275514	8.63282e-05	0.00349828
chr2L	19328399	19329912	1514	Peak_2162	698.597	-1.28174	0.326362	8.58903e-05	0.00349828
chr3R	26090444	26091710	1267	Peak_11251	422.316	-0.996796	0.254202	8.80848e-05	0.00355762
chr3R	12474683	12475073	391	Peak_9746	81.4912	1.26832	0.323536	8.84842e-05	0.00356357
chr2R	6097946	6099293	1348	Peak_3178	931.794	-0.805862	0.205642	8.90024e-05	0.00357426
chr2L	14386225	14387435	1211	Peak_1673	895.389	-1.05639	0.269884	9.06937e-05	0.00363186
chr3L	10750533	10751789	1257	Peak_6540	978.26	-0.928746	0.237504	9.21247e-05	0.00366838
chrX	21249241	21249931	691	Peak_14070	397.508	-0.889655	0.227506	9.21181e-05	0.00366838
chr3R	23044426	23045221	796	Peak_10945	543.552	-0.926929	0.237085	9.24167e-05	0.00366967
chrX	2345645	2348282	2638	Peak_11887	2082.86	-0.583737	0.149332	9.26803e-05	0.00366983
chr2L	21954750	21955467	718	Peak_2469	330.456	-1.04214	0.266892	9.43288e-05	0.00369997
chr3L	10935933	10936966	1034	Peak_6581	308.6	-1.24471	0.318804	9.44884e-05	0.00369997
chr3R	26581936	26582717	782	Peak_11303	208.681	-1.3731	0.351686	9.44806e-05	0.00369997
chr2L	4068896	4070399	1504	Peak_507	1391.78	-0.969509	0.248269	9.41943e-05	0.00369997
chr2L	7913148	7913865	718	Peak_962	228.299	1.36754	0.35035	9.4867e-05	0.00370453
chrX	10007307	10008829	1523	Peak_12794	1176.86	-1.04427	0.267703	9.58595e-05	0.00372272
chr2R	13698603	13699439	837	Peak_4182	432.085	-0.97214	0.249211	9.5844e-05	0.00372272
chr3L	12092452	12093539	1088	Peak_6757	506.858	-0.981533	0.251903	9.76076e-05	0.00378022
chr3R	19250329	19251770	1442	Peak_10499	489.247	-1.13274	0.290874	9.8494e-05	0.00380413
chr2L	2196241	2200914	4674	Peak_299	5682.44	-0.943925	0.24288	0.000101745	0.00391899
chr2L	4656793	4657207	415	Peak_567	101.682	1.34153	0.345302	0.000102287	0.00391981
chrX	17066217	17066715	499	Peak_13586	292.783	-1.13104	0.291285	0.000103201	0.00391981
chrX	1291859	1294656	2798	Peak_11732	4276.68	-0.877471	0.22605	0.000103707	0.00391981
chr2L	11154857	11156029	1173	Peak_1344	847.928	-0.798857	0.205768	0.000103463	0.00391981
chr3L	5940917	5942237	1321	Peak_5975	539.182	-1.02825	0.264757	0.000102848	0.00391981
chr3L	14537112	14537886	775	Peak_7070	252.632	-1.04233	0.268488	0.000103501	0.00391981
chr3L	9761019	9761539	521	Peak_6447	293.748	-1.20522	0.310237	0.000102398	0.00391981
chrX	4388774	4389278	505	Peak_12150	257.649	1.21553	0.313233	0.000104197	0.00392783
chr3L	5947275	5948653	1379	Peak_5978	456.989	-0.859365	0.221507	0.000104616	0.0039331
chrX	22256805	22257484	680	Peak_14136	1215.37	-0.850844	0.219473	0.000105859	0.0039693
chr2L	14572356	14573898	1543	Peak_1730	456.132	-1.03429	0.267089	0.000107749	0.00400788
chr2R	18942277	18943178	902	Peak_4875	627.327	-0.986015	0.25461	0.000107661	0.00400788
chr3L	724208	728732	4525	Peak_5323	2027.76	-0.93426	0.241297	0.000108022	0.00400788
chr3L	1387915	1388807	893	Peak_5424	244.692	-1.06892	0.27604	0.000107801	0.00400788
chr3R	6038535	6039788	1254	Peak_8976	549.13	-0.882273	0.228191	0.000110464	0.00408774
chr3L	15755395	15757027	1633	Peak_7222	1404.48	-0.991145	0.256569	0.000111969	0.00413263
chrX	5904410	5905146	737	Peak_12299	298.017	1.22068	0.316239	0.000113386	0.00414167
chr3R	21563477	21564475	999	Peak_10780	1310.18	-0.755719	0.195769	0.000113269	0.00414167
chr3L	21899555	21900251	697	Peak_8061	271.501	-1.34403	0.348125	0.000113033	0.00414167
chrX	10020479	10021086	608	Peak_12799	162.188	-1.317	0.341156	0.0001132	0.00414167
chrX	2949306	2950049	744	Peak_11966	465.321	-0.824479	0.213768	0.000114841	0.00417323
chr3R	11632452	11634263	1812	Peak_9598	1043.15	-0.952286	0.246885	0.00011469	0.00417323
chr3R	11939884	11941116	1233	Peak_9633	446.243	-0.971202	0.251892	0.000115435	0.00418406
chr2R	11498229	11499032	804	Peak_3918	564.902	-0.942642	0.244607	0.000116348	0.00420637
chr3R	13532301	13533022	722	Peak_9847	300.645	0.930069	0.241393	0.000116719	0.00420656
chr3R	3852716	3853596	881	Peak_8662	588.897	-0.880233	0.228524	0.000117246	0.00420656
chr3L	22377905	22378543	639	Peak_8109	256.94	-1.1915	0.309335	0.000117244	0.00420656
chr3R	10238828	10240092	1265	Peak_9435	519.133	-1.11842	0.29051	0.000118196	0.00422993
chr3L	15746409	15747324	916	Peak_7220	255.601	-1.08457	0.281898	0.000119381	0.00425079
chrX	13139565	13140763	1199	Peak_13124	337.708	-1.09728	0.285162	0.000119131	0.00425079
chr3L	1268979	1269516	538	Peak_5403	265.236	-0.871779	0.22668	0.000120129	0.00425598
chr2L	16842522	16843282	761	Peak_1943	292.169	-0.97434	0.253308	0.000119838	0.00425598
chr3L	7603417	7604203	787	Peak_6162	535.284	-1.12753	0.293506	0.000122245	0.00432013
chr2L	16544623	16545096	474	Peak_1904	256.763	-1.00741	0.262372	0.000123221	0.00434378
chr3R	7674959	7675601	643	Peak_9151	242.194	-1.22276	0.31858	0.000123954	0.00435875
chr2L	7576308	7577895	1588	Peak_925	1294.12	-0.730515	0.190498	0.000125682	0.00440854
chrX	2934641	2936459	1819	Peak_11962	2391.48	-0.490995	0.128217	0.000128448	0.00449439
chr3R	20374543	20374931	389	Peak_10637	113.475	1.2739	0.332847	0.000129571	0.00452251
chr3R	2928522	2929536	1015	Peak_8573	774.605	-0.917279	0.239896	0.000131489	0.0045722
chr3R	27534610	27535419	810	Peak_11416	434.063	-0.899829	0.23535	0.000131642	0.0045722
chr3L	3347604	3347999	396	Peak_5685	124.446	1.27296	0.333107	0.000132661	0.00459631
chr2R	20574712	20576248	1537	Peak_5105	467.514	1.02282	0.267717	0.000133166	0.00460252
chr3R	27179252	27179917	666	Peak_11362	265.639	-1.15094	0.301372	0.000133995	0.00461988
chr3L	959172	960454	1283	Peak_5373	971.669	-0.697841	0.182915	0.000136122	0.00468179
chr2R	10920057	10921904	1848	Peak_3846	783.378	-0.754343	0.197813	0.000137061	0.00469128
chr3R	10255731	10256589	859	Peak_9442	273.382	-1.05743	0.27729	0.000137046	0.00469128
chr3L	13200106	13200688	583	Peak_6923	272.806	-0.991403	0.260069	0.000137805	0.00469509
chr2R	7403059	7404455	1397	Peak_3358	738.458	-0.940749	0.246785	0.000137837	0.00469509
chr3R	20028695	20029750	1056	Peak_10604	436.516	-0.941842	0.247198	0.000138924	0.00472075
chr2L	18455356	18456377	1022	Peak_2030	389.764	-1.05634	0.277369	0.000139851	0.00474086
chr3L	17998369	17998990	622	Peak_7542	289.757	-0.98139	0.257731	0.000140207	0.00474153
chrX	14571509	14572667	1159	Peak_13276	369.234	-1.2625	0.331633	0.000140712	0.00474726
chr3L	13021612	13022934	1323	Peak_6891	1617.99	-0.717054	0.188405	0.000141283	0.00475517
chr3R	12475213	12475545	333	Peak_9747	75.0091	1.32535	0.348613	0.00014366	0.00482371
chr3L	4069966	4072110	2145	Peak_5783	2291.3	-0.80522	0.211875	0.000144432	0.00483814
chr2L	14369701	14370590	890	Peak_1670	355.086	-1.24914	0.329295	0.000148604	0.0049661
chr3R	21826554	21827410	857	Peak_10797	426.367	1.19831	0.316193	0.000150767	0.00502653
chr2R	10304033	10304808	776	Peak_3769	399.679	-0.978331	0.258196	0.00015119	0.00502875
chr2R	16926554	16927561	1008	Peak_4600	365.421	-0.896357	0.236711	0.00015265	0.00505745
chr3L	20983693	20984255	563	Peak_7920	270.578	-0.928336	0.245168	0.000152768	0.00505745
chr2R	7546253	7547115	863	Peak_3401	875.542	-0.906347	0.239719	0.000156276	0.00513748
chr3L	10960772	10961999	1228	Peak_6591	354.062	-0.943445	0.24947	0.000155704	0.00513748
chr3L	437487	438041	555	Peak_5258	256.547	-1.11274	0.294301	0.000156227	0.00513748
chr2R	6124748	6126724	1977	Peak_3185	1046.59	-1.0437	0.276216	0.000157732	0.00517332
chrX	279682	280229	548	Peak_11598	203.378	-1.1256	0.297971	0.000158368	0.00518217
chr2L	17748529	17749571	1043	Peak_1989	551.671	-1.02859	0.272368	0.000159075	0.00519326
chr3R	10394284	10394885	602	Peak_9459	193.625	1.04162	0.275947	0.000160202	0.00521801
chr2L	19895845	19896311	467	Peak_2224	209.251	-0.978481	0.259367	0.000161571	0.00525049
chr3R	17968025	17968747	723	Peak_10365	463.992	-0.953814	0.252987	0.000163114	0.00527867
chr3L	8812267	8813037	771	Peak_6334	675.745	-0.793417	0.21045	0.000163185	0.00527867
chr3L	11359546	11360073	528	Peak_6663	302.335	-0.943394	0.250352	0.000164384	0.00530534
chr3L	11440337	11440767	431	Peak_6684	93.2861	-1.24956	0.332074	0.000167948	0.00539572
chr3L	484662	485600	939	Peak_5264	428.449	-1.07669	0.286132	0.000167948	0.00539572
chr2R	8420240	8421841	1602	Peak_3519	573.151	-1.13501	0.302096	0.000171883	0.00550961
chr3R	6348686	6349340	655	Peak_9010	204.857	-1.33336	0.355018	0.000172819	0.00552707
chr3L	22088907	22090075	1169	Peak_8075	369.454	-1.22051	0.325101	0.000173858	0.00554775
chrX	1513047	1516832	3786	Peak_11755	2692.1	0.859054	0.228912	0.000174892	0.00556818
chr2R	9727350	9727848	499	Peak_3674	145.376	-1.09652	0.292376	0.000176579	0.00559268
chr3R	9828152	9828760	609	Peak_9380	260.458	-1.05963	0.282611	0.000177244	0.00559268
chr3L	806752	808298	1547	Peak_5351	691.372	-0.95593	0.25495	0.000177199	0.00559268
chr3L	7084116	7085131	1016	Peak_6107	477.737	-1.0361	0.276314	0.000177038	0.00559268
chr3R	20537928	20538668	741	Peak_10660	346.722	-0.877347	0.234414	0.000182041	0.00573125
chrX	5194336	5195241	906	Peak_12220	391.721	-0.963336	0.257485	0.000183051	0.00575024
chr3R	9849925	9851369	1445	Peak_9388	796.67	1.06145	0.283912	0.000185008	0.00578889
chrX	20109690	20110301	612	Peak_13987	602.316	-0.945391	0.252939	0.000185766	0.00578889
chr2L	7522307	7523020	714	Peak_917	357.981	-0.754232	0.201799	0.000185834	0.00578889
chr2L	14451629	14452408	780	Peak_1687	346.542	-0.913285	0.244363	0.000185919	0.00578889
chr3L	6272171	6273140	970	Peak_6009	283.026	-1.01142	0.27067	0.000186423	0.00579181
chr2R	17745594	17746288	695	Peak_4721	216.023	-1.14597	0.306827	0.000187779	0.0058019
chr2R	2435632	2436992	1361	Peak_2666	1294.96	-1.38428	0.370659	0.000187979	0.0058019
chrX	17626248	17626796	549	Peak_13664	179.12	-1.19771	0.320661	0.000187634	0.0058019
chr2R	12996111	12996774	664	Peak_4102	261.431	1.07338	0.287486	0.000188711	0.00581181
chr3L	3240594	3241084	491	Peak_5660	191.647	-1.09556	0.293492	0.000189328	0.00581812
chrX	4067428	4068771	1344	Peak_12106	664.875	-1.13068	0.303369	0.000193714	0.00594001
chrX	17606975	17607411	437	Peak_13660	221.406	1.07343	0.288153	0.000195163	0.00597147
chr2L	833259	833566	308	Peak_147	102.237	1.09433	0.293866	0.000196174	0.00598944
chr2R	6046916	6047954	1039	Peak_3174	1235.95	-0.622048	0.167098	0.000197139	0.00600595
chr3L	6464972	6465885	914	Peak_6046	416.284	-1.06885	0.287255	0.000198512	0.00603476
chr2R	5821921	5822456	536	Peak_3128	231.103	-1.09251	0.293806	0.000200423	0.0060798
chr3L	20192289	20192668	380	Peak_7811	151.865	0.936124	0.251993	0.000203303	0.00615393
chr2L	11247295	11248421	1127	Peak_1358	267.019	1.088	0.292967	0.000204217	0.00616511
chr3R	5919141	5919685	545	Peak_8961	261.523	1.18311	0.31869	0.000205279	0.00616511
chrX	20943856	20945571	1716	Peak_14043	1279.44	-0.720175	0.193999	0.000205416	0.00616511
chr2R	20436473	20437576	1104	Peak_5082	689.493	-0.796948	0.214643	0.000204896	0.00616511
chr3R	4649045	4649275	231	Peak_8773	81.9758	1.38652	0.37356	0.000205917	0.00616703
chr3R	15397597	15398223	627	Peak_10059	279.625	-1.21819	0.328286	0.000206636	0.0061755
chr3R	22055515	22056296	782	Peak_10841	596.446	-0.747408	0.201555	0.000208736	0.00621724
chr3L	10336321	10337245	925	Peak_6475	328.349	-0.929829	0.250764	0.000208913	0.00621724
chr3R	2985025	2985655	631	Peak_8584	369.296	-0.881458	0.23793	0.000211645	0.00628533
chrX	10696812	10697376	565	Peak_12868	351.327	-1.16021	0.313275	0.000212665	0.00630236
chr3L	12487932	12488990	1059	Peak_6806	591.891	-1.03891	0.280611	0.000213645	0.00631818
chr3R	19614101	19614977	877	Peak_10540	904.496	-0.738459	0.200072	0.00022341	0.00659317
chrX	4953709	4954211	503	Peak_12215	157.135	1.37673	0.373538	0.000228128	0.00667663
chrX	3274276	3276512	2237	Peak_12006	1265.17	-0.559813	0.151889	0.000228105	0.00667663
chr3R	3161996	3162906	911	Peak_8613	306.366	-0.968141	0.262657	0.000227853	0.00667663
chr2R	14558864	14560215	1352	Peak_4322	678.406	-0.674364	0.182966	0.000228045	0.00667663
chr3L	3342136	3343872	1737	Peak_5684	655.198	-0.632517	0.171656	0.000228891	0.00668513
chr2R	5818963	5819640	678	Peak_3127	300.681	-1.30283	0.353794	0.00023101	0.00673311
chr3R	17432165	17432884	720	Peak_10274	614.232	-0.811777	0.220567	0.000232858	0.00677301
chr3R	9877184	9877745	562	Peak_9394	241.961	1.20327	0.327049	0.00023399	0.00679196
chr2R	4039624	4039918	295	Peak_2900	125.239	1.07227	0.291935	0.000239728	0.00693004
chr3L	6846061	6846493	433	Peak_6084	137.416	-0.950541	0.258776	0.000239513	0.00693004
chr2L	19987000	19987892	893	Peak_2239	496.336	-0.744717	0.202894	0.000242109	0.00698459
chr2R	4526252	4527800	1549	Peak_2950	1160.01	-0.635046	0.173049	0.000242788	0.00698993
chrX	16674988	16675320	333	Peak_13535	109.902	1.15403	0.314527	0.000243411	0.0069936
chr3R	17764081	17765305	1225	Peak_10341	803.584	-0.692989	0.188937	0.000244611	0.00701383
chr3R	2780469	2781135	667	Peak_8544	418.154	-1.10919	0.302513	0.000245824	0.00703435
chr2R	7815187	7815487	301	Peak_3441	99.1057	1.19424	0.325801	0.000246802	0.0070348
chr2L	5305092	5305983	892	Peak_653	1350.26	-0.73411	0.200303	0.000247333	0.0070348
chr2L	21923556	21924155	600	Peak_2465	266.634	-0.979212	0.267172	0.000247243	0.0070348
chr3R	11153417	11155023	1607	Peak_9547	558.12	0.69826	0.190651	0.000249759	0.00708954
chrX	9145942	9146663	722	Peak_12709	690.208	-0.907989	0.248023	0.000251327	0.0071055
chr3L	21245296	21247926	2631	Peak_7962	3381.59	-0.876988	0.239531	0.000250961	0.0071055
chrX	1841051	1843143	2093	Peak_11794	1538.13	-0.757518	0.20698	0.000252351	0.00712024
chr3R	26112811	26113540	730	Peak_11259	198.162	-1.18316	0.32355	0.000255392	0.0071218
chr3L	2873026	2873514	489	Peak_5610	139.871	-1.15847	0.316589	0.000252991	0.0071218
chr3L	13256622	13257567	946	Peak_6933	469.944	-0.800844	0.219017	0.00025564	0.0071218
chr3R	5790242	5791188	947	Peak_8948	399.286	-1.21322	0.331696	0.000254569	0.0071218
chr2R	5169585	5170264	680	Peak_3052	416.684	-0.848809	0.232153	0.000255934	0.0071218
chrX	16092445	16093633	1189	Peak_13456	608.45	-0.932641	0.254972	0.00025437	0.0071218
chr3R	15076324	15077455	1132	Peak_10017	423.283	-1.04625	0.28614	0.000255756	0.0071218
chr2L	632646	635510	2865	Peak_118	2050.51	-0.538021	0.147264	0.000258735	0.00718562
chr3L	17495313	17496072	760	Peak_7465	637.103	-0.821233	0.22486	0.000260002	0.00720665
chr2L	2466543	2467762	1220	Peak_327	1182.79	-1.01509	0.278014	0.000260987	0.0072198
chr2R	19101806	19102351	546	Peak_4890	194.526	-1.17522	0.322684	0.000270506	0.00746849
chrX	18804460	18804865	406	Peak_13813	125.913	1.27429	0.350117	0.000273056	0.00751789
chr2R	17638839	17639688	850	Peak_4709	266.841	-0.908379	0.249601	0.000273358	0.00751789
chr3R	11362844	11363324	481	Peak_9573	170.141	1.20815	0.332078	0.000274619	0.00753696
chr3R	21821572	21823510	1939	Peak_10795	2524.34	-0.615656	0.169245	0.000275118	0.00753696
chr3L	1822133	1822859	727	Peak_5488	261.156	-1.05	0.288781	0.000276937	0.00757211
chr2L	16450897	16451430	534	Peak_1886	216.78	1.08216	0.297737	0.000278399	0.00758277
chr2L	2806073	2806820	748	Peak_356	255.799	-1.13613	0.31256	0.000278071	0.00758277
chr2R	6162839	6163323	485	Peak_3190	149.036	1.21593	0.334723	0.000280544	0.00762649
chr2R	5442139	5443325	1187	Peak_3086	556.311	1.10919	0.305484	0.000282401	0.00766223
chr2L	267365	268093	729	Peak_46	265.966	1.13572	0.313366	0.000289799	0.00781795
chr3L	11366356	11367030	675	Peak_6666	371.4	-1.10855	0.305797	0.000288815	0.00781795
chr3R	13893843	13894746	904	Peak_9871	280.956	-0.987771	0.272545	0.000289798	0.00781795
chrX	12119678	12121210	1533	Peak_13024	1184.82	-0.652692	0.180141	0.000290953	0.00783412
chr2L	19904523	19906151	1629	Peak_2225	472.331	-1.15413	0.318668	0.000292645	0.00784977
chr2R	7535865	7536361	497	Peak_3397	285.269	-1.08371	0.29922	0.000292584	0.00784977
chrX	7875641	7876607	967	Peak_12553	438.649	-1.04305	0.288201	0.00029553	0.00791215
chr3R	4636158	4636748	591	Peak_8767	234.962	0.969857	0.268081	0.000297151	0.0079405
chr3L	9372427	9373988	1562	Peak_6391	2366.05	-0.909379	0.251715	0.00030299	0.00805088
chr3R	17464062	17464651	590	Peak_10287	296.299	-1.08144	0.299317	0.000302636	0.00805088
chr3L	12086868	12087326	459	Peak_6754	209.87	-0.94662	0.261971	0.000302151	0.00805088
chrX	17452556	17453040	485	Peak_13633	166.966	1.09348	0.303079	0.000308698	0.00817932
chr2L	335633	336719	1087	Peak_56	491.473	-0.884624	0.245208	0.000308981	0.00817932
chrX	17431513	17432047	535	Peak_13628	137.81	-1.25638	0.348348	0.000310152	0.00819497
chr3R	19850018	19850823	806	Peak_10578	388.937	-1.05679	0.293082	0.000311203	0.00820741
chrX	8751603	8752114	512	Peak_12648	248.325	-0.747232	0.207265	0.000311914	0.00821082
chr3R	2035827	2037431	1605	Peak_8455	708.065	-0.565537	0.15696	0.000314497	0.00826344
chrX	3149445	3150352	908	Peak_11992	852.536	-0.920991	0.255726	0.000316422	0.00827627
chr2R	13215860	13216430	571	Peak_4116	268.602	-1.02638	0.284975	0.000316182	0.00827627
chr2L	17172260	17172762	503	Peak_1954	203.676	-1.18943	0.330286	0.000316742	0.00827627
chr3L	2868492	2869753	1262	Peak_5609	1127.03	-0.583494	0.162054	0.000317471	0.00828002
chr3R	3151672	3152080	409	Peak_8607	131.393	-0.929323	0.258172	0.000318668	0.00829592
chr3R	821065	821621	557	Peak_8297	275.621	-0.790448	0.219648	0.000319798	0.00830373
chr2L	14387561	14388645	1085	Peak_1674	437.89	-1.02664	0.285303	0.000320142	0.00830373
chr2R	13554914	13555202	289	Peak_4160	60.6686	1.3533	0.376246	0.000322083	0.00832683
chr2R	11458576	11459183	608	Peak_3915	216.343	0.706791	0.196508	0.000322211	0.00832683
chr2L	7023222	7024656	1435	Peak_840	584.29	0.676039	0.187996	0.000323106	0.00833473
chrX	20371588	20372863	1276	Peak_14007	1299.88	-0.584828	0.162734	0.000325918	0.00837668
chrX	871498	872108	611	Peak_11662	218.393	-1.18783	0.330514	0.000325794	0.00837668
chr3R	11456879	11457717	839	Peak_9583	219.321	-1.15291	0.320874	0.000326862	0.0083857
chr3R	12048906	12049566	661	Peak_9661	382.675	1.09855	0.30583	0.000328116	0.00840263
chr2R	15754608	15755267	660	Peak_4453	229.341	-1.23581	0.344449	0.000333484	0.00852466
chrX	19123433	19124525	1093	Peak_13857	733.052	-0.642461	0.179097	0.000334217	0.00852798
chr3L	12555725	12556537	813	Peak_6825	431.301	-1.10585	0.308463	0.000337056	0.00858491
chr3R	6329351	6329908	558	Peak_9008	284.173	-1.01763	0.284017	0.000339701	0.00862836
chr2L	10791153	10792075	923	Peak_1299	243.33	-1.2584	0.351237	0.000339983	0.00862836
chrX	19054262	19054738	477	Peak_13847	205.78	-1.15434	0.322251	0.000340815	0.00863398
chr2L	7357863	7358533	671	Peak_896	259.914	-0.950359	0.265466	0.000343631	0.00868974
chrX	13425062	13425569	508	Peak_13168	148.478	1.09908	0.307509	0.000351403	0.00887043
chr3L	6434572	6435080	509	Peak_6041	179.75	-1.0923	0.305798	0.000354325	0.00892824
chr3L	16182117	16182618	502	Peak_7285	157.272	-1.13316	0.317296	0.000355215	0.00893474
chr3R	17674015	17675270	1256	Peak_10324	374.497	-0.791626	0.221854	0.000359406	0.00902408
chrX	9384860	9385269	410	Peak_12728	146.021	1.27934	0.358668	0.000361202	0.00903708
chr3L	19190065	19190776	712	Peak_7711	377.6	-1.02957	0.288642	0.000361158	0.00903708
chr3R	12367775	12368896	1122	Peak_9738	611.721	-0.994695	0.27895	0.000362665	0.00905766
chrX	7452053	7453742	1690	Peak_12496	699.413	-0.886273	0.248638	0.000364533	0.00908825
chrX	11049892	11050507	616	Peak_12910	239.736	0.841566	0.236153	0.00036573	0.00910204
chr3R	16106017	16106843	827	Peak_10113	251.177	1.107	0.310716	0.000367019	0.00911468
chr3L	2470837	2471742	906	Peak_5555	281.879	-1.14219	0.320627	0.000367527	0.00911468
chr2L	5485161	5486014	854	Peak_670	304.874	-0.947062	0.265954	0.00036945	0.00913107
chr3L	4395106	4396881	1776	Peak_5843	633.605	-1.03201	0.28981	0.00036948	0.00913107
chr3L	1076910	1077502	593	Peak_5379	190.359	-1.25049	0.35123	0.000370429	0.00913855
chr2L	8166080	8166675	596	Peak_999	253.421	1.12537	0.316192	0.000372095	0.00914772
chr3L	20726905	20727564	660	Peak_7887	618.108	-0.894622	0.25134	0.00037169	0.00914772
chr3R	17030457	17030797	341	Peak_10213	95.79	1.07008	0.300815	0.000374723	0.00918039
chr3L	7858045	7858711	667	Peak_6192	248.591	0.748607	0.210437	0.000374547	0.00918039
chr3L	7351899	7353381	1483	Peak_6140	539.327	0.797431	0.224239	0.000376316	0.00918869
chr3L	9050523	9051583	1061	Peak_6371	797.78	-0.740497	0.208258	0.000377012	0.00918869
chr2R	15799378	15800133	756	Peak_4460	550.599	-0.808026	0.227243	0.000376854	0.00918869
chr2R	6961588	6962696	1109	Peak_3289	1304.69	-1.04973	0.295462	0.000381084	0.00927195
chr3L	18070742	18071281	540	Peak_7562	367.488	-0.832751	0.234449	0.000382394	0.00928783
chr2R	14155146	14158045	2900	Peak_4248	1409.78	-0.621241	0.17493	0.000383241	0.00929246
chrX	7073064	7074233	1170	Peak_12453	336.801	-0.917032	0.258307	0.000384986	0.00931876
chr3L	9008585	9009062	478	Peak_6361	118.841	1.03896	0.292828	0.000388129	0.00934683
chr2L	11606922	11607487	566	Peak_1405	222.354	-1.19453	0.336601	0.00038699	0.00934683
chr3L	821806	824165	2360	Peak_5358	895.909	-0.867202	0.244406	0.000387876	0.00934683
chr2R	9353697	9355307	1611	Peak_3635	746.967	-0.689058	0.194279	0.000390027	0.00935065
chrX	6536717	6537797	1081	Peak_12374	459.084	-0.763995	0.215418	0.000390272	0.00935065
chrX	14047987	14048562	576	Peak_13250	219.93	-0.915309	0.258068	0.000389989	0.00935065
chrX	11438177	11438745	569	Peak_12943	348.271	-0.970878	0.273795	0.000391114	0.00935498
chrX	19279980	19280585	606	Peak_13891	318.722	-1.06607	0.301031	0.000398047	0.00950472
chr3L	8484115	8484633	519	Peak_6278	188.83	1.09225	0.308527	0.000399805	0.00951644
chr2L	1570131	1570805	675	Peak_222	304.485	-0.945029	0.266945	0.000399885	0.00951644
chr2L	1688243	1688576	334	Peak_241	150.307	1.28822	0.364376	0.000407127	0.0096563
chrX	14373855	14374752	898	Peak_13264	673.09	-0.764348	0.216193	0.000407012	0.0096563
chr3R	25335936	25336798	863	Peak_11130	240.74	-1.06916	0.302458	0.000407946	0.00965951
chr3R	24717244	24718713	1470	Peak_11052	1093.67	-0.459767	0.130167	0.000412228	0.0097283
chr3R	27368308	27369228	921	Peak_11383	701.983	-1.01069	0.286118	0.00041179	0.0097283
chrX	17811557	17812075	519	Peak_13700	184.361	-1.08815	0.308332	0.000416892	0.00982198
chr2L	7750671	7751029	359	Peak_935	106.132	-1.19695	0.339319	0.000419497	0.00986692
chrX	13963220	13964132	913	Peak_13238	257.961	-1.01954	0.289254	0.000423932	0.00995466
chr2L	17743499	17744176	678	Peak_1987	366.578	-0.773303	0.219598	0.00042919	0.0100462
chr2L	19894909	19895590	682	Peak_2223	161.774	-0.869798	0.247003	0.000429253	0.0100462
chr3L	5124306	5124657	352	Peak_5895	110.845	-0.939748	0.266994	0.000431984	0.0100915
chr3L	12583537	12584209	673	Peak_6833	302.066	-1.12465	0.319563	0.000432617	0.0100915
chrX	1208599	1209260	662	Peak_11719	408.355	-0.83951	0.238606	0.000434162	0.0101109
chr2L	21871563	21872123	561	Peak_2458	164.641	1.02507	0.291427	0.000435763	0.0101148
chr3L	7736768	7737215	448	Peak_6176	227.749	-0.970567	0.275911	0.000435327	0.0101148
chr3R	27781615	27782208	594	Peak_11449	188.782	-0.953238	0.271599	0.000448576	0.0103896
chrX	17439917	17440815	899	Peak_13630	232.983	-1.04825	0.298695	0.000449068	0.0103896
chr2L	12467593	12467955	363	Peak_1467	92.8671	1.14974	0.32768	0.000450266	0.0104003
chr3L	22458621	22460576	1956	Peak_8131	1918.64	-0.740139	0.211098	0.000454663	0.0104484
chr3L	2163627	2164609	983	Peak_5532	766.874	-0.651987	0.185976	0.000455305	0.0104484
chr2L	11220680	11221769	1090	Peak_1356	716.582	-0.606217	0.172908	0.00045488	0.0104484
chr3L	2117553	2118326	774	Peak_5521	253.966	-1.09616	0.312654	0.000454904	0.0104484
chr2L	6701546	6702110	565	Peak_800	247.064	-0.879942	0.251119	0.000458191	0.0104976
chrX	17551208	17553446	2239	Peak_13648	1381.77	0.555921	0.158738	0.00046157	0.0105579
chr3R	11942700	11943932	1233	Peak_9635	295.902	-1.01817	0.290788	0.000462813	0.0105692
chr2R	11135172	11136873	1702	Peak_3873	676.477	-0.90075	0.25744	0.000467228	0.0106528
chr2L	17216687	17217628	942	Peak_1956	348.197	-0.997536	0.285408	0.000473848	0.0107863
chr2L	8574548	8575498	951	Peak_1069	462.493	-0.701271	0.200726	0.000476415	0.0108192
chr3L	4546548	4547310	763	Peak_5867	305.31	-0.939842	0.269063	0.000477589	0.0108192
chrX	5915408	5916593	1186	Peak_12305	593.419	-1.03172	0.295347	0.000477186	0.0108192
chr3L	16815179	16815722	544	Peak_7385	242.931	-0.975502	0.279342	0.000479152	0.0108373
chr2L	7830703	7830982	280	Peak_946	62.5464	1.29987	0.372285	0.000480135	0.010838
chr3R	17242341	17243187	847	Peak_10244	590.288	-0.695482	0.199206	0.000480719	0.010838
chr2L	22117426	22118153	728	Peak_2481	467.501	-0.677253	0.19401	0.00048153	0.010839
chr3R	3762403	3763071	669	Peak_8642	1009.02	-0.827004	0.236959	0.000482904	0.0108527
chr2R	20820194	20820724	531	Peak_5141	246.101	-1.01662	0.291458	0.000486538	0.010917
chr2L	1573464	1574579	1116	Peak_223	797.393	-0.653567	0.187487	0.000490426	0.0109868
chr3R	4797263	4797882	620	Peak_8799	548.081	1.09818	0.315566	0.000501388	0.0111979
chr3L	7511016	7511439	424	Peak_6150	154.519	-1.01879	0.292756	0.000501435	0.0111979
chr2R	1383838	1384540	703	Peak_2546	608.669	-0.712679	0.204851	0.000503276	0.0112213
chr2R	4173148	4173503	356	Peak_2915	111.839	-1.13848	0.327324	0.000504879	0.0112393
chrX	21151753	21153537	1785	Peak_14052	2197.23	-0.728754	0.209707	0.000510666	0.0113503
chr3L	3865085	3865954	870	Peak_5761	297.136	-1.14714	0.33017	0.000512006	0.0113622
chr2R	4545267	4545998	732	Peak_2961	252.135	0.964742	0.278528	0.000532782	0.0117312
chr2L	8291985	8292822	838	Peak_1016	468.836	0.8837	0.255123	0.000532555	0.0117312
chr2L	14559957	14561125	1169	Peak_1725	755.094	-0.981768	0.283319	0.000529769	0.0117312
chr3L	2881365	2882042	678	Peak_5614	330.075	-1.00244	0.289358	0.000531496	0.0117312
chr3R	4783287	4784153	867	Peak_8796	467.86	-0.694985	0.200596	0.000531004	0.0117312
chr2R	9458415	9458715	301	Peak_3655	121.446	0.973332	0.281135	0.000535869	0.0117387
chrX	17988190	17988639	450	Peak_13706	155.018	1.1857	0.342503	0.000536446	0.0117387
chrX	1305026	1306272	1247	Peak_11733	1331.08	-0.76152	0.219942	0.00053545	0.0117387
chrX	13977674	13978148	475	Peak_13241	155.381	-1.19354	0.344725	0.000535587	0.0117387
chr2L	14225781	14227158	1378	Peak_1649	1983.45	-0.702278	0.202892	0.00053749	0.0117434
chr2L	18503832	18504356	525	Peak_2046	304.921	-0.957524	0.276919	0.000544651	0.0118697
chrX	2947119	2948006	888	Peak_11965	315.614	-0.758438	0.219352	0.00054495	0.0118697
chr2L	6502922	6503251	330	Peak_769	137.494	1.03926	0.300715	0.000548323	0.01187
chr2L	16783855	16784281	427	Peak_1935	195.043	1.12584	0.325747	0.000547911	0.01187
chrX	1459233	1461515	2283	Peak_11748	3642.97	-0.657953	0.190368	0.00054782	0.01187
chr3L	14265226	14265677	452	Peak_7023	353.6	-0.681086	0.197067	0.000548009	0.01187
chr3L	6367665	6368208	544	Peak_6031	198.705	1.06817	0.309169	0.000550348	0.0118956
chrX	13643023	13643618	596	Peak_13198	274.861	1.15794	0.33527	0.000552813	0.0119306
chr3R	11103587	11104060	474	Peak_9536	231.76	0.719898	0.208512	0.000555311	0.0119663
chr2R	10941365	10942639	1275	Peak_3851	1689.46	-0.627891	0.181885	0.000556189	0.011967
chr3L	16182884	16183357	474	Peak_7286	258.507	-0.841261	0.243801	0.000559336	0.0120164
chr2L	2804495	2805312	818	Peak_355	1096.56	-0.865075	0.25102	0.000568434	0.0121474
chr2L	14021495	14022121	627	Peak_1638	527.447	-0.76	0.22059	0.000570413	0.0121474
chrX	10441411	10442245	835	Peak_12833	737.412	-0.584285	0.16958	0.000570037	0.0121474
chr2L	18504657	18505406	750	Peak_2047	232.622	-1.03006	0.298902	0.000568644	0.0121474
chr2L	19225598	19226934	1337	Peak_2155	719.471	-0.791601	0.229723	0.000569184	0.0121474
chr3L	19014490	19015485	996	Peak_7676	1136.23	-0.898179	0.260703	0.00057059	0.0121474
chrX	18102800	18103683	884	Peak_13714	429.742	-1.13191	0.328592	0.000571662	0.0121519
chr3R	5439024	5439536	513	Peak_8896	218.808	-0.967204	0.281117	0.00058047	0.0123206
chr3L	21244287	21245009	723	Peak_7961	322.746	-0.885304	0.257387	0.000582604	0.0123474
chrX	14630477	14631153	677	Peak_13285	207.598	-1.2246	0.356108	0.000584193	0.0123625
chr3L	18007350	18007788	439	Peak_7548	237.149	-1.10133	0.320352	0.000586278	0.0123881
chr2L	21878895	21880279	1385	Peak_2459	1295.99	-0.868337	0.252684	0.000589388	0.0124352
chr3L	17994550	17995105	556	Peak_7540	292.959	-1.08566	0.315989	0.000590951	0.0124496
chr3L	21123739	21124909	1171	Peak_7950	977.41	-0.630126	0.183439	0.000592391	0.0124614
chr3L	12435297	12436463	1167	Peak_6794	536.209	-0.912842	0.265974	0.000598988	0.0125714
chr3L	10309046	10309645	600	Peak_6468	217.889	-1.10844	0.322984	0.000599401	0.0125714
chr2L	14279295	14279917	623	Peak_1658	235.27	-1.08045	0.314984	0.000603214	0.0126326
chr3L	15775106	15775581	476	Peak_7225	219.899	-0.990952	0.289088	0.000608353	0.0127214
chr2L	14365810	14366818	1009	Peak_1668	494.16	-0.729367	0.212802	0.000609301	0.0127224
chr3R	6427516	6428631	1116	Peak_9032	741.839	-0.888003	0.259176	0.000611965	0.012738
chr2R	6435793	6436467	675	Peak_3218	295.177	-1.02927	0.300387	0.000611442	0.012738
chr3L	11014851	11015427	577	Peak_6603	181.43	-1.04991	0.306462	0.00061275	0.012738
chr3R	740011	740733	723	Peak_8279	364.859	-1.06809	0.31188	0.000615491	0.012739
chr3L	8649351	8651570	2220	Peak_6301	1172.55	-0.691963	0.202051	0.000615503	0.012739
chr3L	17919427	17919805	379	Peak_7522	125.037	-1.03299	0.30159	0.000614454	0.012739
chrX	22247677	22248265	589	Peak_14133	210.178	-0.947257	0.276737	0.000619461	0.0128022
chr2R	5437555	5437983	429	Peak_3084	169.815	0.840991	0.245821	0.000623555	0.0128492
chr3L	9049484	9050054	571	Peak_6370	308.017	-0.733627	0.214436	0.000623471	0.0128492
chr2L	1578902	1579748	847	Peak_224	291.651	1.05072	0.307183	0.000625081	0.0128572
chr2R	14222213	14223483	1271	Peak_4264	999.875	-1.25339	0.366467	0.000625762	0.0128572
chr3R	26897059	26897602	544	Peak_11339	161.438	-1.24378	0.36394	0.000631876	0.012964
chr3R	9851449	9851992	544	Peak_9389	242.392	0.962122	0.281693	0.000636655	0.0130104
chr2L	5525685	5526120	436	Peak_678	159.886	0.83216	0.24365	0.0006369	0.0130104
chr3R	7197541	7198959	1419	Peak_9101	2739.86	-0.748608	0.219179	0.000636649	0.0130104
chrX	3055631	3057423	1793	Peak_11987	4059.93	-0.737645	0.216003	0.000637882	0.0130117
chr3R	14943715	14945206	1492	Peak_9997	977.663	-0.759773	0.222527	0.000639475	0.0130254
chr3L	1688483	1689036	554	Peak_5469	408.79	-0.811193	0.237699	0.000643254	0.013046
chr3R	21380682	21382147	1466	Peak_10756	2636.57	-0.611524	0.179184	0.000642916	0.013046
chr3R	10324166	10325161	996	Peak_9456	564.559	-0.672702	0.197086	0.000641945	0.013046
chr3R	17264262	17264876	615	Peak_10248	240.784	-0.988732	0.289789	0.000645107	0.0130648
chr2L	18139345	18140014	670	Peak_2008	132.497	1.19558	0.350513	0.000647382	0.0130921
chr3R	19738049	19739129	1081	Peak_10556	763.95	-0.609212	0.178641	0.00064902	0.0131065
chr2L	3348174	3348725	552	Peak_415	187.357	-1.01515	0.297782	0.00065191	0.0131087
chrX	18569144	18569764	621	Peak_13782	417.349	-0.854709	0.250679	0.000650626	0.0131087
chrX	6225684	6226344	661	Peak_12340	266.149	-0.867193	0.254373	0.000651688	0.0131087
chr2L	18645283	18646095	813	Peak_2064	224.441	-1.2285	0.360418	0.000653086	0.0131137
chr2R	2409776	2410692	917	Peak_2657	380.635	-0.980728	0.287838	0.000656265	0.0131568
chr3R	27111692	27112258	567	Peak_11353	168.769	-0.998539	0.293095	0.000657097	0.0131568
chrX	2993015	2993644	630	Peak_11975	542.999	-0.747549	0.219462	0.000658553	0.0131673
chr2L	507070	507655	586	Peak_85	496.154	-0.664119	0.195156	0.000666451	0.0132877
chrX	13837424	13838011	588	Peak_13220	460.782	-0.862201	0.253343	0.000665773	0.0132877
chr2L	5869715	5870149	435	Peak_697	132.512	1.22121	0.358916	0.000667768	0.0132952
chrX	18908720	18909854	1135	Peak_13837	271.284	-0.994659	0.292511	0.000672843	0.0133231
chr3L	10980696	10981076	381	Peak_6594	131.831	-1.13568	0.333948	0.000671951	0.0133231
chr2R	17413955	17414949	995	Peak_4663	360.647	-0.85614	0.251817	0.000674224	0.0133231
chr3L	10915763	10916182	420	Peak_6574	136.199	-0.991344	0.291638	0.000675769	0.0133231
chrX	21916487	21917232	746	Peak_14108	471.017	-0.702556	0.206614	0.000673064	0.0133231
chr3L	1389019	1389679	661	Peak_5425	171.569	-1.06078	0.312058	0.000675589	0.0133231
chr3R	25507723	25508447	725	Peak_11158	403.416	-0.873202	0.256764	0.000671902	0.0133231
chr2R	15935682	15936529	848	Peak_4482	484.847	-0.873032	0.25691	0.000678307	0.013336
chr3R	7682095	7682782	688	Peak_9154	312.494	-1.11796	0.328956	0.000677539	0.013336
chr2R	20849119	20849574	456	Peak_5147	168.053	0.994271	0.292715	0.000681983	0.0133525
chr2R	12273671	12275120	1450	Peak_4024	1554.12	-0.590626	0.17388	0.000681913	0.0133525
chr3R	26692849	26693214	366	Peak_11325	100.555	-1.02482	0.301702	0.000681813	0.0133525
chr2R	20167823	20168564	742	Peak_5045	210.941	-1.04869	0.308828	0.000684523	0.0133837
chr2L	4812214	4813358	1145	Peak_574	374.684	0.831817	0.245287	0.000695886	0.013531
chr2R	17759110	17759728	619	Peak_4724	865.853	-0.732723	0.216018	0.00069397	0.013531
chr2R	1596828	1597849	1022	Peak_2558	621.252	-0.884667	0.260829	0.000694472	0.013531
chr3L	6398155	6398614	460	Peak_6038	176.729	-0.92349	0.272315	0.000695715	0.013531
chrX	8923879	8924586	708	Peak_12668	488.683	-0.609268	0.179919	0.000708305	0.0137536
chr2R	15793751	15794483	733	Peak_4459	359.328	-0.858078	0.253533	0.000713137	0.0138181
chr2R	10677991	10678498	508	Peak_3808	174.629	-1.08271	0.319921	0.000713582	0.0138181
chr2R	17549439	17550021	583	Peak_4692	181.952	1.02219	0.302105	0.00071557	0.0138376
chr3R	11421616	11422356	741	Peak_9581	207.546	-1.14987	0.339935	0.000717988	0.0138654
chr3R	27523521	27525070	1550	Peak_11413	2793.56	-0.921369	0.272502	0.000721834	0.0139207
chr2L	18466639	18467190	552	Peak_2035	397.778	-1.05086	0.310874	0.000723973	0.0139429
chr3R	19015918	19017476	1559	Peak_10463	992.123	0.620842	0.183776	0.00072947	0.0139916
chr2R	5879099	5879665	567	Peak_3141	92.5682	1.23932	0.366819	0.000728628	0.0139916
chr3L	13478952	13482503	3552	Peak_6953	2524.41	-0.622756	0.184311	0.000727945	0.0139916
chr3L	16883802	16884505	704	Peak_7397	895.366	-0.936062	0.277271	0.000735544	0.0140889
chr3L	15933767	15934505	739	Peak_7233	235.085	-0.868106	0.257389	0.000744258	0.0142366
chr2R	17428468	17431209	2742	Peak_4668	2448.3	-0.579747	0.17197	0.000748362	0.0142957
chr3R	19149092	19149724	633	Peak_10484	545.953	-0.775954	0.230222	0.000750405	0.0142961
chr2R	19070409	19070935	527	Peak_4882	112.023	-1.22827	0.364407	0.000750045	0.0142961
chr2L	2165705	2167345	1641	Peak_289	818.924	0.964029	0.286356	0.000761154	0.0144718
chr2L	12718744	12720540	1797	Peak_1514	695.815	0.851655	0.253018	0.0007627	0.0144718
chrX	9549932	9550933	1002	Peak_12750	427.922	-1.00158	0.297546	0.000762335	0.0144718
chrX	8929206	8929629	424	Peak_12669	170.796	0.976369	0.29018	0.000766256	0.0145198
chr3R	5707032	5707760	729	Peak_8934	743.305	-0.721018	0.214319	0.000767561	0.0145251
chr3R	5789157	5790033	877	Peak_8947	472.448	-1.0839	0.32242	0.000774435	0.0146356
chrX	15990434	15990891	458	Peak_13434	190.2	0.818743	0.243597	0.000776467	0.0146544
chr3R	727621	728025	405	Peak_8275	121.2	1.00605	0.299391	0.000778532	0.0146722
chr3R	878734	879447	714	Peak_8310	364.318	-0.778352	0.231679	0.000780524	0.0146722
chr3L	1904856	1905271	416	Peak_5506	160.662	-0.840428	0.25013	0.000779518	0.0146722
chr3L	10356460	10357254	795	Peak_6482	559.555	-0.749301	0.223068	0.000782036	0.0146811
chr3L	14329133	14330063	931	Peak_7034	389.467	0.896233	0.266881	0.000784609	0.0146959
chr3R	22955053	22956079	1027	Peak_10922	949.009	-0.686932	0.204562	0.000784903	0.0146959
chr2L	9120640	9121252	613	Peak_1108	222.059	0.919663	0.274052	0.000791381	0.014757
chr3L	6795451	6796350	900	Peak_6070	503.973	-0.757109	0.225619	0.000791653	0.014757
chr2L	4211006	4212492	1487	Peak_512	956.15	-0.65729	0.19588	0.000791996	0.014757
chr3R	10211594	10212508	915	Peak_9432	303.734	-0.905324	0.269807	0.000792346	0.014757
chr3R	564498	565786	1289	Peak_8247	1297.17	-0.670302	0.19979	0.000793577	0.0147605
chr3L	5794892	5795899	1008	Peak_5951	1418.51	-0.660305	0.196909	0.000798417	0.0148311
chr3L	10889189	10889414	226	Peak_6567	47.458	1.2146	0.362496	0.000806201	0.0149229
chrX	14080930	14081378	449	Peak_13252	167.676	-0.861639	0.257164	0.00080653	0.0149229
chrX	13959705	13959999	295	Peak_13237	116.543	-0.976607	0.291421	0.000804639	0.0149229
chr2L	5119069	5119666	598	Peak_620	367.909	-0.705147	0.210506	0.000808802	0.0149454
chr3R	23513967	23514672	706	Peak_10981	187.25	-1.07752	0.321807	0.000812994	0.0150032
chrX	21460400	21461731	1332	Peak_14074	633.729	-0.866351	0.258866	0.000817759	0.0150323
chr2R	18829561	18830282	722	Peak_4854	299.021	-0.83834	0.250478	0.000817048	0.0150323
chr3R	4297410	4298372	963	Peak_8731	246.958	-0.928049	0.277297	0.000817596	0.0150323
chr3R	16377329	16378235	907	Peak_10129	354.959	0.716135	0.21416	0.000826032	0.0151647
chrX	13266259	13266663	405	Peak_13152	153.807	1.01691	0.30434	0.000833626	0.0152749
chr2L	16258068	16258621	554	Peak_1856	163.849	0.863232	0.258361	0.000834198	0.0152749
chr2L	9136705	9137266	562	Peak_1112	505.789	-0.863492	0.2585	0.000836614	0.0152993
chrX	13432172	13432843	672	Peak_13171	338.532	0.986378	0.295414	0.000840903	0.0153447
chrX	9864762	9865243	482	Peak_12777	298.814	-0.820479	0.245737	0.000841269	0.0153447
chr2R	10221551	10221959	409	Peak_3759	123.193	1.00388	0.300731	0.000843432	0.0153545
chr2R	15179395	15179937	543	Peak_4395	215.153	0.766471	0.229623	0.000843978	0.0153545
chr2L	15462882	15464380	1499	Peak_1829	1193.89	-0.671149	0.201144	0.000847941	0.0154068
chr3L	18218529	18218846	318	Peak_7595	87.9345	1.21454	0.364319	0.000856948	0.0154908
chr2R	17751237	17752207	971	Peak_4722	805.965	-0.786501	0.235897	0.000855808	0.0154908
chr3L	3771132	3772049	918	Peak_5745	406.9	-0.669268	0.200744	0.000856244	0.0154908
chr3R	16109283	16110323	1041	Peak_10115	441.088	-1.29118	0.387293	0.000856499	0.0154908
chr2R	18688220	18688842	623	Peak_4835	117.065	1.07983	0.323959	0.000858438	0.0154979
chr3R	11496223	11496946	724	Peak_9594	375.039	-0.747519	0.224416	0.000865516	0.0156058
chr3L	21678406	21679004	599	Peak_8017	297.631	0.954758	0.286834	0.000872824	0.0156975
chr3R	5585300	5585762	463	Peak_8915	213.828	0.903561	0.271435	0.000872105	0.0156975
chr3R	19613195	19613927	733	Peak_10539	287.047	0.911908	0.274099	0.000878086	0.0157521
chr3L	10518613	10519261	649	Peak_6497	314.41	-0.992724	0.298378	0.000877646	0.0157521
chr3R	15290841	15291615	775	Peak_10056	254.461	-0.948153	0.285077	0.000881176	0.0157677
chr3L	21702382	21704223	1842	Peak_8025	1087.62	-1.01702	0.305785	0.000881191	0.0157677
chr3L	12699270	12700353	1084	Peak_6861	400.916	-0.771845	0.232267	0.000890246	0.0159096
chrX	10478210	10479003	794	Peak_12841	357.446	-0.94728	0.285255	0.000897521	0.0160194
chr2R	15693064	15694173	1110	Peak_4439	626.108	-0.901902	0.271702	0.000901951	0.0160579
chr2L	18141553	18142425	873	Peak_2009	734.35	-0.732896	0.220785	0.000901799	0.0160579
chr2R	15851308	15852064	757	Peak_4470	188.718	-1.20466	0.362952	0.000903151	0.0160591
chrX	7435048	7436154	1107	Peak_12491	586.737	-0.883097	0.266208	0.000908854	0.0161402
chr2R	19461853	19462261	409	Peak_4932	152.959	1.23799	0.373343	0.000913333	0.0161588
chr3L	12471089	12471807	719	Peak_6802	244.269	-0.940394	0.283582	0.000912736	0.0161588
chr3L	738305	740289	1985	Peak_5330	1147.86	-0.772664	0.233013	0.000913278	0.0161588
chr3R	16893916	16894513	598	Peak_10190	111.773	1.15367	0.348172	0.000921345	0.0162802
chr3R	26649496	26649816	321	Peak_11318	144.386	1.1233	0.339291	0.000930485	0.0163803
chr3R	25926017	25927312	1296	Peak_11225	481.115	-0.845112	0.255248	0.000929832	0.0163803
chr2R	19313283	19314456	1174	Peak_4918	643.369	-1.25363	0.378632	0.000929794	0.0163803
chr2R	18537149	18537615	467	Peak_4815	118.47	1.06995	0.323307	0.00093503	0.0164398
chrX	12118408	12118990	583	Peak_13023	325.534	-1.13549	0.343174	0.000936951	0.0164531
chr3R	677913	678715	803	Peak_8264	2344.05	-0.96969	0.293199	0.000942075	0.0165067
chr3L	5618213	5618687	475	Peak_5935	206.489	-0.907152	0.274296	0.000942339	0.0165067
chr2L	1439657	1440524	868	Peak_202	349.832	-0.880885	0.266624	0.000953676	0.0166846
chrX	9608001	9608404	404	Peak_12758	105.371	1.10195	0.333686	0.000958791	0.016712
chr2R	7287198	7287607	410	Peak_3341	188.006	-1.0754	0.325647	0.00095873	0.016712
chrX	7061606	7062058	453	Peak_12450	138.832	-1.23003	0.372468	0.000958663	0.016712
chr3R	19703328	19704004	677	Peak_10550	255.18	-0.81851	0.248108	0.000970279	0.0168361
chr2R	1578553	1579866	1314	Peak_2554	1542.76	-0.805085	0.243993	0.000968157	0.0168361
chr2L	529933	531133	1201	Peak_94	1073.96	-0.590353	0.178923	0.000968639	0.0168361
chr3L	18155331	18155857	527	Peak_7571	257.119	-0.857378	0.259899	0.000970674	0.0168361
chrX	2148102	2148494	393	Peak_11850	142.697	0.937723	0.284365	0.000975144	0.0168585
chr2L	7503560	7504980	1421	Peak_914	453.355	-0.938816	0.284649	0.000973213	0.0168585
chr2L	13837180	13838023	844	Peak_1620	850.497	-0.554293	0.168113	0.000976736	0.0168585
chr3L	16353986	16355088	1103	Peak_7313	322.164	-0.967594	0.293435	0.000975578	0.0168585
chr2R	14323990	14324220	231	Peak_4284	86.6157	0.949199	0.287941	0.000978965	0.0168764
chr4	1263986	1264388	403	Peak_11564	137.843	0.966616	0.293346	0.000983727	0.0169109
chr2R	14721236	14721671	436	Peak_4342	160.228	1.01415	0.307779	0.000984035	0.0169109
chr3R	4053668	4054506	839	Peak_8700	307.731	-1.04248	0.316392	0.000984554	0.0169109
chr2L	108650	109592	943	Peak_21	495.456	0.871111	0.264464	0.000988195	0.0169528
chrX	1026625	1026964	340	Peak_11686	141.573	1.06497	0.323532	0.000995846	0.0169953
chr3L	603278	604273	996	Peak_5286	465.772	0.79869	0.242678	0.0009978	0.0169953
chr4	63564	63887	324	Peak_11463	129.655	0.760859	0.231205	0.000998887	0.0169953
chr3L	20941926	20945468	3543	Peak_7913	4507.23	-0.685284	0.208243	0.000999089	0.0169953
chr3L	21800985	21802190	1206	Peak_8044	2164.17	-0.591133	0.179628	0.000998799	0.0169953
chrX	3580606	3581579	974	Peak_12044	899.178	-0.583226	0.177193	0.000996657	0.0169953
chrX	3330835	3332538	1704	Peak_12025	793.081	-0.616285	0.187203	0.000994542	0.0169953
chr3L	11289533	11291634	2102	Peak_6650	1287.98	-0.568037	0.172831	0.00101379	0.0172247
chr3L	2877296	2877851	556	Peak_5612	312.584	-0.736256	0.224147	0.00102088	0.0172584
chr3L	1754691	1756050	1360	Peak_5478	2107.37	-0.555742	0.169205	0.00102188	0.0172584
chr2R	10934549	10935262	714	Peak_3849	287.55	-0.696997	0.212185	0.00102035	0.0172584
chr2R	20426548	20428897	2350	Peak_5076	1441.98	-0.72887	0.221907	0.00102136	0.0172584
chrX	17245527	17246609	1083	Peak_13607	359.344	-0.85741	0.260977	0.00101843	0.0172584
chr3R	18215737	18216476	740	Peak_10393	443.281	0.740951	0.22571	0.00102797	0.0173199
chr2R	4214278	4215332	1055	Peak_2923	2793.21	-0.66959	0.203962	0.0010274	0.0173199
chr3R	19312325	19312982	658	Peak_10507	173.258	-0.862949	0.262983	0.00103299	0.0173837
chrX	843448	844036	589	Peak_11661	269.053	-0.902485	0.275152	0.00103826	0.0174517
chrX	19663809	19665609	1801	Peak_13952	868.75	0.90296	0.275644	0.00105356	0.0176459
chr2R	9918751	9919404	654	Peak_3715	991.061	-0.884295	0.269945	0.0010535	0.0176459
chr2L	10457331	10458014	684	Peak_1270	324.365	-0.875285	0.267163	0.00105205	0.0176459
chr3R	10179710	10180410	701	Peak_9423	411.07	-0.947797	0.289383	0.00105574	0.0176614
chr2R	11750257	11751190	934	Peak_3947	289.277	0.77226	0.236044	0.00106909	0.0178426
chr4	509416	510361	946	Peak_11504	926.95	-0.69665	0.212915	0.00106805	0.0178426
chr2L	8012420	8012968	549	Peak_981	238.594	1.00834	0.308375	0.00107608	0.0179318
chr2L	1886753	1888348	1596	Peak_259	575.614	-0.868792	0.265718	0.00107697	0.0179318
chr3R	16137025	16137471	447	Peak_10120	176.48	1.08868	0.333214	0.00108608	0.0180621
chrX	16826364	16826809	446	Peak_13558	140.821	-1.20713	0.369752	0.00109583	0.0182029
chr3L	10439852	10440230	379	Peak_6491	132.951	-0.812406	0.249163	0.00111198	0.0184494
chrX	9632722	9633157	436	Peak_12760	123.225	-1.11006	0.340598	0.00111741	0.0185178
chr3R	17520174	17520983	810	Peak_10304	481.619	-0.847223	0.259984	0.00111902	0.0185228
chr3R	10180572	10181157	586	Peak_9424	167.323	-1.04377	0.320361	0.00112163	0.0185443
chrX	4601109	4602043	935	Peak_12183	323.75	0.788919	0.242257	0.00112782	0.0186248
chrX	9360477	9360907	431	Peak_12721	197.346	-0.79631	0.244583	0.00113081	0.0186524
chrX	15761506	15764202	2697	Peak_13412	1144.61	0.510322	0.156796	0.00113517	0.0186808
chrX	19052697	19053507	811	Peak_13845	315.779	-0.96304	0.295883	0.00113473	0.0186808
chr3L	18197133	18197843	711	Peak_7584	303.674	0.780981	0.240065	0.0011411	0.018691
chr3R	11414120	11415123	1004	Peak_9580	445.264	-0.675161	0.207479	0.00113746	0.018691
chr3L	18208610	18209487	878	Peak_7590	279.082	-0.849739	0.261176	0.00113988	0.018691
chr3R	23418434	23419764	1331	Peak_10971	507.414	-0.73182	0.224976	0.0011424	0.018691
chr3R	2078494	2079049	556	Peak_8461	312.193	-0.658683	0.20246	0.00114035	0.018691
chr3R	5703158	5703740	583	Peak_8931	179.147	1.0745	0.330432	0.00114669	0.0187178
chr2L	21008166	21010508	2343	Peak_2351	3061.25	-0.589955	0.181423	0.00114668	0.0187178
chrX	7601884	7602409	526	Peak_12520	195.197	0.824105	0.253661	0.00115877	0.0188714
chr2L	2486404	2487922	1519	Peak_333	854.714	-0.718267	0.221081	0.00115861	0.0188714
chr2R	3032293	3034027	1735	Peak_2748	1433.94	-0.66679	0.20527	0.00116076	0.018882
chr3R	2674134	2674847	714	Peak_8527	929.033	-0.855001	0.263284	0.00116445	0.0189202
chr3L	1390392	1391048	657	Peak_5426	273.496	-0.865342	0.266611	0.00117157	0.0190141
chrX	551241	551664	424	Peak_11627	97.001	1.1226	0.345932	0.00117393	0.0190306
chr2R	11878440	11879139	700	Peak_3967	322.245	0.568006	0.17508	0.00117752	0.0190451
chrX	1925066	1925717	652	Peak_11807	279.608	-0.978068	0.301473	0.00117738	0.0190451
chr2L	15438776	15439228	453	Peak_1824	172.903	1.05174	0.324326	0.00118338	0.0191181
chr2L	3631910	3633302	1393	Peak_462	1833.03	-0.557498	0.171961	0.00118689	0.0191217
chr3L	17476884	17477565	682	Peak_7456	419.385	-1.07509	0.33169	0.0011901	0.0191217
chr2L	3436793	3437585	793	Peak_422	383.232	-1.0112	0.311935	0.00118818	0.0191217
chr3R	5432887	5433439	553	Peak_8894	259.347	-0.881387	0.271874	0.00118738	0.0191217
chr2R	2394154	2394994	841	Peak_2650	294.864	-0.981948	0.30296	0.00119037	0.0191217
chr3R	24909542	24910321	780	Peak_11072	274.72	-0.891072	0.27496	0.00119221	0.0191295
chr3L	18945481	18946029	549	Peak_7668	502.597	-0.785732	0.242796	0.00121141	0.0194155
chr3L	11284288	11284796	509	Peak_6646	191.518	1.13606	0.35126	0.00121965	0.0195254
chr3L	21097704	21098174	471	Peak_7944	197.253	-0.951066	0.294317	0.00123168	0.0196873
chr2L	16597687	16598647	961	Peak_1910	545.105	-0.803078	0.248536	0.00123255	0.0196873
chrX	9362006	9363307	1302	Peak_12722	407.106	-0.947401	0.293289	0.00123676	0.0197323
chr3L	20970731	20971169	439	Peak_7914	157.604	-0.88168	0.272975	0.00123837	0.0197357
chr3R	14292559	14292970	412	Peak_9927	121.972	1.15037	0.356393	0.00124746	0.0198526
chrX	19388072	19389177	1106	Peak_13900	457.794	0.708683	0.219572	0.00124851	0.0198526
chr3L	4188189	4188638	450	Peak_5803	108.036	0.982951	0.304593	0.00125053	0.0198623
chr2R	6417958	6418371	414	Peak_3210	164.841	0.817147	0.253385	0.00126006	0.0199507
chr3R	6371954	6373003	1050	Peak_9019	702.043	-0.898734	0.27866	0.00125884	0.0199507
chr2L	14674854	14675254	401	Peak_1754	119.826	-1.01304	0.314135	0.00126032	0.0199507
chr2L	1927377	1927817	441	Peak_265	159.301	1.01571	0.315128	0.00126781	0.0199574
chrX	802590	803598	1009	Peak_11656	980.803	-0.66371	0.205855	0.00126343	0.0199574
chr3R	26275386	26276467	1082	Peak_11280	1097.27	-0.42215	0.130971	0.00126754	0.0199574
chrX	6467504	6468534	1031	Peak_12363	604.267	-0.806641	0.250201	0.00126426	0.0199574
chr2R	15840249	15840789	541	Peak_4467	166.632	-0.897335	0.278364	0.00126589	0.0199574
chr3R	24908555	24909349	795	Peak_11071	369.315	-0.710564	0.220636	0.00127955	0.0201198
chr3R	26080766	26082026	1261	Peak_11247	1186.25	-0.635044	0.197214	0.00128157	0.0201292
chrX	9393952	9395382	1431	Peak_12732	1216.28	-0.538704	0.167354	0.00128664	0.0201864
chr3R	17425291	17425803	513	Peak_10270	318.73	-0.847895	0.263484	0.00129079	0.0201935
chr2R	6956147	6956716	570	Peak_3285	162.094	-1.10524	0.343469	0.00129138	0.0201935
chr3R	3804057	3805066	1010	Peak_8653	474.356	-0.624849	0.194153	0.00128941	0.0201935
chr3L	16969029	16969790	762	Peak_7411	765.369	-0.640197	0.198978	0.00129351	0.0202044
chr2R	4881732	4882551	820	Peak_3004	467.41	-0.942236	0.293013	0.00130134	0.0203043
chr2L	12707601	12708319	719	Peak_1512	220.244	0.731406	0.227498	0.00130446	0.0203306
chr3L	15945631	15946462	832	Peak_7234	313.323	-0.70807	0.22034	0.00131109	0.0204114
chr3L	21038009	21038479	471	Peak_7933	167.393	-1.03353	0.321703	0.00131507	0.0204395
chr3L	6839649	6841243	1595	Peak_6082	1787.07	-0.759742	0.236495	0.00131579	0.0204395
chr3L	1810239	1810979	741	Peak_5485	754.985	-0.797244	0.248267	0.00132164	0.0205079
chr2L	5249298	5250640	1343	Peak_637	1426.13	-0.795203	0.247681	0.00132464	0.0205095
chr2R	15850012	15850327	316	Peak_4469	86.5947	-1.17516	0.366023	0.00132444	0.0205095
chr3R	26028592	26029528	937	Peak_11238	273.038	0.881685	0.274649	0.00132632	0.020513
chr3L	22819653	22820054	402	Peak_8154	134.449	-0.992844	0.30934	0.0013294	0.0205382
chr3R	21458812	21460485	1674	Peak_10765	781.257	-0.764323	0.238322	0.0013408	0.0206917
chr3R	23510324	23512355	2032	Peak_10980	1626.3	-0.566585	0.176809	0.00135293	0.0208334
chr3R	11919519	11920629	1111	Peak_9628	570.329	-0.757793	0.236462	0.00135195	0.0208334
chr3R	6667566	6668712	1147	Peak_9067	664.492	0.756918	0.236385	0.00136448	0.0209864
chr3L	7883127	7883592	466	Peak_6198	179.792	-0.706878	0.220777	0.00136584	0.0209864
chr2R	8614683	8615066	384	Peak_3541	128.162	-1.11593	0.348648	0.00137071	0.0210261
chr2R	14199119	14201039	1921	Peak_4261	2148.52	-0.749128	0.234058	0.0013714	0.0210261
chrX	19052085	19052550	466	Peak_13844	178.905	-0.984578	0.307854	0.00138288	0.0211563
chr3R	10294024	10295071	1048	Peak_9448	368.19	-0.769998	0.240747	0.00138205	0.0211563
chr2L	5084115	5084895	781	Peak_612	365.397	-0.97021	0.303447	0.00138724	0.0211771
chrX	13208774	13209870	1097	Peak_13141	486.013	-0.56233	0.175863	0.00138604	0.0211771
chr3R	12065039	12065754	716	Peak_9668	209.549	0.768087	0.240439	0.00140066	0.0213589
chr2R	12697806	12698663	858	Peak_4063	275.517	0.694161	0.217352	0.00140453	0.0213949
chr3L	5829443	5829939	497	Peak_5958	139.637	-0.825238	0.258429	0.00140662	0.0214036
chr2R	10931059	10931900	842	Peak_3847	310.539	-0.963157	0.301658	0.00140861	0.0214108
chr2L	11382251	11383376	1126	Peak_1380	633.264	-0.793737	0.248648	0.00141184	0.021437
chr3L	780359	781730	1372	Peak_5345	384.092	-0.98015	0.307162	0.00141791	0.0215059
chrX	6754127	6755008	882	Peak_12414	551.805	0.701749	0.219984	0.00142271	0.0215556
chrX	11039836	11040424	589	Peak_12906	117.783	1.15074	0.360769	0.00142432	0.021557
chr2L	17380603	17381014	412	Peak_1969	187.78	-0.805311	0.252549	0.00142896	0.021604
chrX	10704752	10705343	592	Peak_12873	317.198	1.01312	0.317847	0.00143529	0.0216766
chr3L	12113157	12113526	370	Peak_6767	134.854	0.907746	0.285315	0.00146486	0.0220996
chr3L	13942480	13942938	459	Peak_6977	229.999	0.971529	0.305443	0.00146909	0.0221398
chr3L	15663059	15663419	361	Peak_7211	129.054	0.983105	0.309274	0.00147912	0.0221963
chrX	21610470	21610730	261	Peak_14090	59.616	1.24757	0.392448	0.00147807	0.0221963
chr3L	10845384	10846620	1237	Peak_6560	1436.99	-0.641703	0.201863	0.00147833	0.0221963
chr2R	16578138	16578610	473	Peak_4569	174.247	-1.0497	0.330174	0.0014766	0.0221963
chrX	3245382	3246231	850	Peak_12000	336.493	-0.961786	0.30264	0.00148303	0.0222078
chr3R	4751470	4752420	951	Peak_8786	963.871	-0.613996	0.193203	0.00148302	0.0222078
chr3L	18888075	18888480	406	Peak_7660	139.053	1.10132	0.346688	0.00148962	0.0222828
chr3R	26653166	26653789	624	Peak_11319	513.883	-0.753822	0.237388	0.00149587	0.0223526
chr2L	110129	110475	347	Peak_22	126.636	1.12676	0.354993	0.00150329	0.0223714
chrX	14965773	14966203	431	Peak_13323	114.848	1.03334	0.325518	0.00150116	0.0223714
chr2L	20296739	20297238	500	Peak_2268	129.348	-0.945228	0.297761	0.00150118	0.0223714
chr3L	12033159	12033954	796	Peak_6739	712.579	-0.743033	0.234099	0.00150346	0.0223714
chr2L	11020638	11021994	1357	Peak_1320	946.111	-0.687373	0.216593	0.00150573	0.0223817
chr3L	17850248	17850763	516	Peak_7511	227.694	1.07205	0.337966	0.00151364	0.0224757
chrX	8145669	8146087	419	Peak_12585	150.561	0.936046	0.295201	0.00151981	0.0225182
chr2R	10102930	10103628	699	Peak_3736	199.694	1.00846	0.318097	0.00152287	0.0225182
chr3R	10223083	10225329	2247	Peak_9434	1033.48	-0.664781	0.209633	0.00151828	0.0225182
chr2L	17242604	17244015	1412	Peak_1961	1014.4	-0.599837	0.189205	0.00152285	0.0225182
chr2R	17032392	17032839	448	Peak_4616	121.594	0.971814	0.306577	0.00152501	0.0225261
chr2R	3176729	3177614	886	Peak_2771	1054.23	-0.554308	0.174888	0.00152702	0.0225322
chr3L	13205381	13206116	736	Peak_6924	294.554	-0.8342	0.263269	0.00153165	0.0225771
chr3R	2903832	2904084	253	Peak_8569	76.133	0.989912	0.312463	0.0015344	0.022594
chr3R	1827182	1827454	273	Peak_8430	74.1017	1.21485	0.38387	0.00155216	0.0228289
chr2R	20674674	20675677	1004	Peak_5115	731.28	-0.699478	0.22104	0.00155358	0.0228289
chr2R	12498882	12499756	875	Peak_4043	432.541	-0.73516	0.232344	0.00155562	0.0228351
chr3R	18012871	18013723	853	Peak_10377	421.69	-0.86758	0.27429	0.00156149	0.0228738
chr2L	8701624	8702458	835	Peak_1079	296.514	-1.02241	0.323211	0.00155993	0.0228738
chrX	8984718	8985194	477	Peak_12683	82.0837	1.10028	0.348013	0.00156905	0.0229608
chr2R	9637403	9637994	592	Peak_3666	174.915	-1.15232	0.364539	0.00157211	0.0229818
chrX	1719537	1720871	1335	Peak_11769	394.188	-0.706952	0.223698	0.00157606	0.0230156
chr3R	4013118	4013870	753	Peak_8690	248.779	0.877846	0.27787	0.00158204	0.0230447
chr2R	1997237	1998225	989	Peak_2603	766.294	-0.884374	0.279964	0.00158373	0.0230447
chr4	432199	432656	458	Peak_11495	225.879	-0.865776	0.274071	0.00158342	0.0230447
chr3L	13260109	13260532	424	Peak_6934	96.2008	-1.08331	0.342956	0.00158457	0.0230447
chr2L	2861485	2861988	504	Peak_364	175.003	1.07745	0.341155	0.00158722	0.0230501
chr3R	19765335	19766180	846	Peak_10567	396.622	0.910775	0.288423	0.00158978	0.0230501
chrX	22249166	22249807	642	Peak_14135	193.121	-1.0939	0.346416	0.00158983	0.0230501
chr3L	17604073	17604427	355	Peak_7487	98.4834	-1.17269	0.371558	0.00159873	0.0231553
chr2R	20472072	20472466	395	Peak_5090	104.769	1.05808	0.335277	0.00160047	0.0231568
chr3R	276955	277352	398	Peak_8229	121.131	0.782259	0.247975	0.00160722	0.023189
chr3R	22896840	22897362	523	Peak_10916	183.469	0.659277	0.208994	0.00160762	0.023189
chr2R	5568826	5569694	869	Peak_3100	282.314	-0.876929	0.277966	0.00160607	0.023189
chr3L	19285079	19286570	1492	Peak_7721	652.808	-0.614862	0.194958	0.00161148	0.023221
chr3R	16420297	16420821	525	Peak_10144	373.554	-0.714078	0.226496	0.00161759	0.0232854
chrX	13123154	13123678	525	Peak_13116	256.069	-0.837217	0.265653	0.00162409	0.0233551
chr3R	9831709	9833449	1741	Peak_9383	1076.19	-0.623582	0.197887	0.00162597	0.0233584
chr3R	3801546	3801950	405	Peak_8651	86.928	1.04555	0.331948	0.0016341	0.0234276
chr3L	17602769	17603332	564	Peak_7486	133.096	-1.21326	0.385188	0.00163386	0.0234276
chrX	9794024	9794447	424	Peak_12773	146.61	-1.0302	0.327137	0.00163747	0.0234522
chr2L	11206785	11207193	409	Peak_1353	153.599	0.841215	0.267216	0.0016435	0.0235147
chr3R	17714788	17715325	538	Peak_10330	217.354	0.70562	0.22419	0.00164716	0.0235271
chrX	13538472	13539075	604	Peak_13183	178.632	-0.930475	0.29564	0.00164769	0.0235271
chr3R	21884246	21884768	523	Peak_10818	138.95	0.958653	0.304709	0.00165448	0.0235289
chr2L	21846225	21848089	1865	Peak_2449	1347.1	-0.577786	0.183624	0.00165192	0.0235289
chr2L	15264278	15265077	800	Peak_1787	1034.29	-0.606083	0.19263	0.00165315	0.0235289
chr2R	15036965	15037362	398	Peak_4375	159.274	-0.925204	0.294033	0.00165178	0.0235289
chr2L	7409371	7409851	481	Peak_903	158.944	0.836411	0.265904	0.00165782	0.0235526
chrX	17573967	17574520	554	Peak_13651	702.201	-0.960458	0.305665	0.00167691	0.0238001
chr3R	14262505	14262949	445	Peak_9919	178.623	0.792396	0.252254	0.00168221	0.0238035
chr3R	22695166	22695747	582	Peak_10884	124.551	1.05384	0.335479	0.00168195	0.0238035
chr2R	7533044	7533759	716	Peak_3396	290.802	-0.890524	0.283471	0.00168084	0.0238035
chr3L	2472220	2472880	661	Peak_5556	369.3	-0.650741	0.207235	0.00168884	0.0238735
chr3L	2418522	2418821	300	Peak_5551	128.163	1.07691	0.343269	0.00170558	0.0240379
chr3R	13995448	13996057	610	Peak_9888	409.955	0.594225	0.189397	0.00170421	0.0240379
chr2L	10615411	10616689	1279	Peak_1280	550.662	-0.796654	0.253933	0.00170533	0.0240379
chr2R	11240748	11241601	854	Peak_3887	438.181	-0.911206	0.290489	0.00170803	0.0240485
chr3L	4055397	4055896	500	Peak_5781	284.243	-0.955191	0.30465	0.00171634	0.0241415
chr2L	1473436	1474308	873	Peak_213	283.753	-0.973483	0.310574	0.00172167	0.0241684
chr2L	16715688	16716841	1154	Peak_1926	909.439	-0.571673	0.182379	0.00172125	0.0241684
chr3L	6792928	6793524	597	Peak_6069	155.276	-0.994538	0.317422	0.00172925	0.0242507
chr3R	683565	684038	474	Peak_8266	229.679	0.891429	0.284674	0.00173975	0.0243619
chr3R	20908041	20908997	957	Peak_10706	573.037	-0.706885	0.225835	0.00174752	0.0243619
chr3L	482530	483238	709	Peak_5263	327.884	-0.710251	0.226903	0.00174687	0.0243619
chr3L	18806994	18807719	726	Peak_7644	317.784	-0.82991	0.265075	0.00174303	0.0243619
chr2L	16599943	16600579	637	Peak_1911	293.131	-0.889062	0.283987	0.00174427	0.0243619
chr2L	20965063	20965611	549	Peak_2343	367.193	-0.664882	0.212375	0.00174392	0.0243619
chr2L	3341235	3341562	328	Peak_412	108.381	-0.913839	0.292006	0.00175094	0.0243855
chr3L	18019728	18020016	289	Peak_7551	73.9667	1.15821	0.370231	0.00175799	0.0244116
chrX	2361926	2362900	975	Peak_11894	497.091	0.931641	0.297773	0.00175585	0.0244116
chr2L	7199779	7200212	434	Peak_873	250.172	-0.882749	0.28217	0.00175744	0.0244116
chr3R	17162041	17163618	1578	Peak_10227	1462.53	-0.591704	0.189262	0.00176978	0.0244943
chr3L	17967777	17968207	431	Peak_7532	173.592	-1.04499	0.334238	0.00176913	0.0244943
chrX	21880967	21881829	863	Peak_14102	399.809	-0.92808	0.29682	0.00176754	0.0244943
chr3L	21714170	21714922	753	Peak_8029	715.585	-0.90154	0.288383	0.00177088	0.0244943
chr2R	6977273	6977958	686	Peak_3294	324.311	-0.925042	0.296016	0.00177823	0.0245514
chrX	6197706	6198273	568	Peak_12335	265.766	-0.879777	0.281535	0.00177848	0.0245514
chr2R	8846021	8847950	1930	Peak_3577	1965.76	-0.743075	0.23786	0.00178409	0.0246048
chrX	19666182	19666539	358	Peak_13953	131.608	1.10155	0.352757	0.00179208	0.0246774
chr3L	12546515	12547384	870	Peak_6821	492.449	0.990034	0.317058	0.00179285	0.0246774
chr3L	3434352	3435052	701	Peak_5703	275.075	1.04374	0.334525	0.00180811	0.0248633
chr2R	14582584	14582938	355	Peak_4328	129.716	0.906343	0.290621	0.00181684	0.0248784
chr3R	230612	230865	254	Peak_8219	53.4038	1.21087	0.388284	0.0018177	0.0248784
chrX	18377186	18378208	1023	Peak_13752	1290.92	-0.622291	0.19948	0.00181119	0.0248784
chr2L	16545580	16546132	553	Peak_1905	272.55	-0.875233	0.28063	0.00181578	0.0248784
chr3R	15111573	15113322	1750	Peak_10026	2042.76	-0.700105	0.224504	0.00181801	0.0248784
chr2R	17603032	17603765	734	Peak_4705	160.262	1.0066	0.322865	0.00182259	0.0248929
chr2L	9438107	9438741	635	Peak_1140	242.529	-0.931968	0.298905	0.00182122	0.0248929
chrX	1969270	1970074	805	Peak_11816	216.566	0.807272	0.258959	0.00182465	0.024897
chr3L	12688335	12689093	759	Peak_6857	264.05	-0.793487	0.254753	0.00184111	0.0250973
chr2R	11500680	11502729	2050	Peak_3919	1777.02	-0.868016	0.278708	0.00184305	0.0250995
chr2L	7518102	7518685	584	Peak_916	188.065	0.909827	0.292196	0.0018472	0.0251319
chr3R	25922568	25923121	554	Peak_11222	331.225	-0.726663	0.233412	0.0018506	0.025154
chr3R	2766559	2767896	1338	Peak_8542	892.93	1.14017	0.366405	0.00185972	0.0252536
chr2R	14830726	14831542	817	Peak_4363	352.364	-0.892175	0.286791	0.00186528	0.0253048
chrX	19742042	19742761	720	Peak_13963	789.626	-0.817144	0.262719	0.00186872	0.0253272
chr2L	13569499	13572194	2696	Peak_1599	1422.88	-0.703393	0.226312	0.00188318	0.0254987
chr2R	8299444	8300661	1218	Peak_3500	555.499	-0.670374	0.215722	0.00188624	0.0255157
chr3R	24365821	24366851	1031	Peak_11020	999.455	-0.582615	0.187519	0.0018902	0.0255448
chr3R	16892259	16892512	254	Peak_10189	110.676	0.928347	0.298952	0.00190062	0.0256611
chr2L	7026554	7027729	1176	Peak_841	423.392	0.720007	0.231908	0.00190465	0.0256665
chr3R	20416067	20416425	359	Peak_10647	185.085	0.978411	0.315113	0.00190308	0.0256665
chr2L	2747319	2747787	469	Peak_347	82.5944	1.20303	0.3876	0.00191054	0.0257213
chr3R	17417690	17418017	328	Peak_10267	164.429	0.851586	0.274521	0.00192164	0.0258462
chr2R	9877726	9879645	1920	Peak_3701	989.851	0.634824	0.204739	0.00193093	0.0259464
chrX	19732472	19733270	799	Peak_13959	300.783	-0.740014	0.238705	0.0019344	0.0259683
chr2R	15349525	15351375	1851	Peak_4414	1705.99	0.507548	0.163858	0.00195166	0.0261752
chr2L	14552151	14553259	1109	Peak_1720	1006.54	-0.951545	0.307236	0.00195412	0.0261834
chr3L	6432798	6433589	792	Peak_6040	260.442	-0.998026	0.322298	0.00195757	0.0262048
chr3R	6399138	6400330	1193	Peak_9023	1233.68	-0.691383	0.223297	0.00195982	0.0262101
chr3R	24454263	24454868	606	Peak_11027	320.573	-0.946982	0.305878	0.00196186	0.0262125
chrX	2901574	2902092	519	Peak_11955	141.109	1.13868	0.368007	0.00197348	0.0263429
chr2R	14428955	14429650	696	Peak_4294	380.57	-0.687134	0.222142	0.00197999	0.0263649
chr3R	11236755	11237332	578	Peak_9559	194.534	-1.03171	0.333551	0.00198072	0.0263649
chr3L	2823062	2825362	2301	Peak_5597	3372.26	-0.616173	0.199184	0.00197825	0.0263649
chr2L	3000415	3001066	652	Peak_387	257.862	-0.939155	0.303707	0.00198609	0.0264114
chrX	19467810	19468126	317	Peak_13909	138.097	0.949264	0.307059	0.00199169	0.0264362
chr2R	5274836	5275387	552	Peak_3058	258.429	0.875151	0.283077	0.00199102	0.0264362
chr3L	11529592	11530702	1111	Peak_6690	460.11	0.692036	0.223878	0.00199393	0.0264411
chr3L	16995270	16996013	744	Peak_7415	627.316	-0.899714	0.291161	0.00200097	0.0265096
chr3L	16315118	16315566	449	Peak_7306	154.079	-0.799582	0.258815	0.00200566	0.0265468
chr3R	9622142	9623060	919	Peak_9339	559.284	-0.726156	0.235112	0.00201133	0.0265969
chrX	19739680	19740064	385	Peak_13961	184.103	-0.872989	0.282689	0.00201402	0.0266077
chr2R	2424785	2426352	1568	Peak_2663	562.495	-0.871595	0.282285	0.0020175	0.0266287
chrX	2683650	2687284	3635	Peak_11932	2005.61	0.678054	0.219635	0.00202058	0.0266446
chrX	1885924	1886278	355	Peak_11802	91.935	1.03274	0.334614	0.0020263	0.0266743
chr3L	14050023	14050363	341	Peak_6995	101.444	0.877942	0.284538	0.00203208	0.0266743
chr3R	9717765	9718394	630	Peak_9359	165.668	0.922398	0.298907	0.00202936	0.0266743
chr2R	15792733	15793279	547	Peak_4458	185.201	-1.06958	0.346649	0.00203227	0.0266743
chr3R	17662975	17664403	1429	Peak_10322	1993.74	-0.535677	0.173601	0.00203082	0.0266743
chrX	5323833	5324755	923	Peak_12233	501.312	0.767739	0.248864	0.00203574	0.0266951
chr3R	4647394	4647797	404	Peak_8772	121.934	1.04464	0.338922	0.00205442	0.0268652
chr3R	302702	303293	592	Peak_8234	259.56	0.833275	0.270303	0.00205106	0.0268652
chr2L	9126966	9127603	638	Peak_1111	392.201	-0.823499	0.267156	0.00205295	0.0268652
chr3L	13189209	13189656	448	Peak_6921	120.176	-1.03338	0.335331	0.00205852	0.026894
chr2R	9865906	9867399	1494	Peak_3699	549.944	0.724551	0.23516	0.00206234	0.0268941
chr3R	14750874	14751245	372	Peak_9969	74.2681	1.13585	0.368626	0.0020609	0.0268941
chr2R	16083928	16085045	1118	Peak_4518	339.134	-0.780028	0.253265	0.00207081	0.0269301
chrX	6199392	6200087	696	Peak_12337	302.101	-0.913542	0.296609	0.00207037	0.0269301
chr3R	11941544	11942299	756	Peak_9634	369.091	-0.695187	0.225713	0.00207028	0.0269301
chr3R	10257554	10258134	581	Peak_9443	286.209	-0.905919	0.294307	0.00208297	0.0270633
chr2R	6483625	6484861	1237	Peak_3231	700.979	0.667051	0.21682	0.00209427	0.0271353
chr2R	9786656	9787156	501	Peak_3679	206.169	0.848148	0.275665	0.00209281	0.0271353
chr2L	6926358	6926745	388	Peak_824	58.298	1.18834	0.386206	0.00209124	0.0271353
chrX	16225724	16226065	342	Peak_13476	155.563	0.746799	0.242799	0.00209947	0.0271591
chr3R	5725062	5725738	677	Peak_8938	420.552	-0.661959	0.215297	0.00210764	0.0271591
chr2L	4053598	4054577	980	Peak_505	612.816	-0.637094	0.207161	0.00210254	0.0271591
chrX	2217722	2218304	583	Peak_11870	530.507	-0.619662	0.201539	0.00210749	0.0271591
chr3L	14343109	14344762	1654	Peak_7040	555.84	-0.902371	0.293474	0.00210649	0.0271591
chr2R	3639986	3640453	468	Peak_2847	167.865	-1.03915	0.337961	0.00210671	0.0271591
chr2R	20855911	20857755	1845	Peak_5149	742.009	0.648871	0.211091	0.00211284	0.0272014
chr2R	5435561	5436157	597	Peak_3083	257.393	-0.804677	0.261823	0.00211661	0.0272251
chrX	16765678	16766684	1007	Peak_13547	329.079	-0.755182	0.245796	0.00212349	0.0272888
chr3L	4519439	4519880	442	Peak_5861	175.545	-0.786203	0.255927	0.00212644	0.0273019
chr3R	2258068	2258802	735	Peak_8490	178.805	-0.922744	0.300429	0.00213042	0.0273281
chr3R	9468047	9468438	392	Peak_9319	87.9524	0.983208	0.320323	0.00214472	0.0274322
chr2R	9882882	9883754	873	Peak_3704	784.587	-0.776689	0.25302	0.00214293	0.0274322
chr2R	14453531	14454111	581	Peak_4298	177.885	-0.917644	0.298984	0.00214629	0.0274322
chr3L	16967847	16968944	1098	Peak_7410	573.124	-0.644935	0.210117	0.00214485	0.0274322
chrX	13423492	13424272	781	Peak_13167	400.9	0.856985	0.279398	0.0021603	0.027575
chr3R	26395532	26397128	1597	Peak_11292	1224.99	-0.594989	0.19399	0.00216137	0.027575
chrX	17464633	17465682	1050	Peak_13636	557.318	-0.573787	0.187153	0.00217042	0.0276655
chr2R	13512199	13513646	1448	Peak_4157	516.068	-0.678008	0.221204	0.00217606	0.0277114
chr3L	18269334	18269810	477	Peak_7609	134.296	-1.14445	0.373415	0.00217794	0.0277114
chr3R	19052315	19052801	487	Peak_10470	190.733	0.76091	0.248323	0.00218256	0.0277452
chr2R	9357838	9358831	994	Peak_3636	442.258	-0.751674	0.245452	0.00219567	0.0278868
chr2L	5080248	5080486	239	Peak_611	102.105	1.13094	0.369402	0.00220191	0.0279409
chr3R	6439815	6440894	1080	Peak_9034	2618.55	-0.75426	0.246478	0.00221222	0.0280214
chr3R	20792609	20792940	332	Peak_10687	153.217	-0.795979	0.2601	0.00221131	0.0280214
chr2L	704703	705204	502	Peak_136	153.576	1.11395	0.364132	0.00221944	0.0280877
chr3R	1829642	1830079	438	Peak_8432	104.886	1.13231	0.370403	0.00223581	0.0282696
chr3L	6767299	6768024	726	Peak_6065	231.269	-0.908878	0.29735	0.00223865	0.0282802
chr2R	16832465	16832902	438	Peak_4583	80.4826	1.16377	0.381082	0.00225924	0.0284894
chr2R	11978538	11979287	750	Peak_3979	457.179	-0.985552	0.322717	0.00225874	0.0284894
chr3L	10916392	10916777	386	Peak_6575	101.075	-1.08386	0.355129	0.00227312	0.0286389
chrX	591901	592374	474	Peak_11632	244.268	-0.865067	0.28349	0.00227708	0.0286632
chr3L	11321790	11322804	1015	Peak_6655	753.28	-0.658989	0.216058	0.00228801	0.0287327
chr2L	6165468	6166774	1307	Peak_735	1078.96	-0.708611	0.232305	0.00228575	0.0287327
chr2R	18290861	18292123	1263	Peak_4786	1147.83	-0.572983	0.187866	0.0022887	0.0287327
chr3L	8864016	8864452	437	Peak_6342	103.392	-1.06841	0.350492	0.0023014	0.0288665
chr3R	24921030	24923064	2035	Peak_11078	3157.31	-0.609005	0.199861	0.00231023	0.0289516
chr3R	19271480	19271889	410	Peak_10501	140.426	0.940066	0.308668	0.00232252	0.0289533
chr2L	13295711	13296877	1167	Peak_1573	568.893	0.477436	0.156725	0.00231656	0.0289533
chr2R	4560864	4561417	554	Peak_2968	277.83	-0.838545	0.275306	0.00232017	0.0289533
chr3L	666123	667941	1819	Peak_5307	874.816	-0.632446	0.207663	0.00232266	0.0289533
chr2L	7554401	7555144	744	Peak_923	229.707	-0.968672	0.317964	0.00231535	0.0289533
chr3R	8162477	8163080	604	Peak_9207	196.399	-0.949767	0.311749	0.00231462	0.0289533
chr2L	20807993	20808215	223	Peak_2315	92.4418	1.06403	0.349428	0.00232634	0.0289737
chr3R	806919	807660	742	Peak_8290	340.113	-0.815634	0.26796	0.00233558	0.0290631
chr3L	3845637	3846479	843	Peak_5757	2277.32	-0.710073	0.233365	0.00234426	0.0291455
chrX	12570402	12571570	1169	Peak_13066	1640.15	-0.555237	0.18252	0.00234964	0.0291868
chr2L	17376903	17377303	401	Peak_1968	115.836	-0.973376	0.320171	0.00236442	0.0293445
chr3R	14751714	14752269	556	Peak_9970	145.733	0.910266	0.299459	0.00236812	0.0293647
chr3L	19046750	19047049	300	Peak_7684	104.858	-0.807987	0.265848	0.00237148	0.0293805
chr2L	9816176	9816948	773	Peak_1190	306.626	-0.644562	0.212139	0.00237839	0.0294146
chr3R	11459501	11460768	1268	Peak_9584	441.094	-0.756905	0.249103	0.00237744	0.0294146
chr3R	12089585	12090162	578	Peak_9679	264.447	0.694659	0.228668	0.00238278	0.0294413
chr3R	15733420	15733754	335	Peak_10094	128.696	1.10807	0.364817	0.00238679	0.0294413
chr2R	11632839	11633336	498	Peak_3930	294.711	-0.690041	0.227173	0.00238538	0.0294413
chr3L	13757066	13757390	325	Peak_6962	75.2509	1.14328	0.37663	0.00240097	0.0295903
chr3L	1584775	1585607	833	Peak_5456	264.297	-0.889545	0.293202	0.00241418	0.0297272
chr2R	20879659	20879859	201	Peak_5155	46.9229	1.15891	0.382063	0.0024191	0.0297429
chr3L	8813623	8816475	2853	Peak_6335	3423.92	-0.510172	0.168195	0.00241966	0.0297429
chr3R	8527068	8528229	1162	Peak_9244	454.89	-0.716868	0.236393	0.00242511	0.0297581
chr3R	9800521	9800930	410	Peak_9373	220.287	-0.858162	0.282981	0.00242474	0.0297581
chr3L	7614608	7615467	860	Peak_6165	260.358	0.853165	0.281503	0.00243952	0.0298521
chr2R	14160726	14161154	429	Peak_4250	135.476	0.885717	0.2923	0.0024442	0.0298521
chr3L	17483161	17483570	410	Peak_7460	153.166	0.898742	0.296639	0.00244755	0.0298521
chrX	2201410	2201946	537	Peak_11866	210.775	0.766747	0.253047	0.00244508	0.0298521
chr3R	2251124	2252501	1378	Peak_8489	745.11	-0.532352	0.175706	0.00244727	0.0298521
chr3R	21914588	21915252	665	Peak_10828	193.175	-1.00873	0.332917	0.00244575	0.0298521
chr3R	2857215	2857819	605	Peak_8563	180.768	-0.973132	0.321154	0.00244462	0.0298521
chr3L	14420181	14420885	705	Peak_7051	1348.55	-0.672744	0.222083	0.00245159	0.0298741
chr3R	10621790	10622405	616	Peak_9497	256.767	-0.891269	0.294295	0.00245781	0.0298741
chrX	13931723	13932623	901	Peak_13236	741.292	-0.656926	0.216883	0.00245411	0.0298741
chr2R	15503166	15504267	1102	Peak_4422	560.025	-0.59819	0.19751	0.00245649	0.0298741
chr3L	16155236	16155554	319	Peak_7273	104.75	0.995	0.328588	0.00246086	0.0298855
chr3L	6379846	6380415	570	Peak_6035	146.181	-0.931912	0.307833	0.00246723	0.0299372
chr3L	18750108	18750734	627	Peak_7631	332.456	1.01058	0.333969	0.00247828	0.0299615
chr2L	6672445	6672739	295	Peak_793	91.4324	1.04279	0.344635	0.00247984	0.0299615
chr2R	12699208	12699674	467	Peak_4064	130.977	-0.855305	0.282622	0.00247547	0.0299615
chrX	6863425	6864135	711	Peak_12425	361.277	-0.992433	0.327986	0.00247942	0.0299615
chr3R	20791398	20791791	394	Peak_10686	125.182	-1.11856	0.36967	0.00247954	0.0299615
chr3L	4251977	4252630	654	Peak_5816	643.627	-0.621651	0.205491	0.00248475	0.0299952
chr2R	3632522	3633316	795	Peak_2844	760.682	0.735822	0.243294	0.00249113	0.0300466
chr3R	16616795	16617314	520	Peak_10163	239.088	-0.953078	0.315177	0.00249503	0.030068
chr3R	1486040	1486808	769	Peak_8404	282.922	0.751982	0.248755	0.00250302	0.0301344
chrX	20360616	20361025	410	Peak_14005	179.533	-0.778175	0.257482	0.00250907	0.0301344
chr2L	14000827	14001484	658	Peak_1635	343.979	-0.580271	0.191988	0.00250753	0.0301344
chr3R	22863081	22864065	985	Peak_10912	508.841	-0.842961	0.278875	0.00250517	0.0301344
chr3R	3123116	3123703	588	Peak_8599	169.944	1.13286	0.374977	0.00251819	0.0302136
chrX	19265698	19266454	757	Peak_13889	384.913	-0.876677	0.290202	0.00252007	0.0302136
chr3L	14357370	14358403	1034	Peak_7045	513.82	-0.873378	0.289133	0.00252208	0.0302136
chr2R	16071749	16072183	435	Peak_4514	128.435	-1.04324	0.345534	0.00253425	0.0303338
chr2R	8063439	8064219	781	Peak_3472	123.254	1.0806	0.358177	0.00255328	0.0304476
chr2L	1153391	1153800	410	Peak_179	140.139	0.917108	0.303921	0.00254795	0.0304476
chr3L	12021544	12022136	593	Peak_6737	227.251	-0.885608	0.293544	0.0025533	0.0304476
chr2L	20434703	20435233	531	Peak_2278	238.431	-0.623883	0.206806	0.00255494	0.0304476
chr2L	16453400	16453894	495	Peak_1887	188.217	-1.01246	0.335531	0.0025487	0.0304476
chr3L	18025936	18026318	383	Peak_7553	101.314	-1.08859	0.360872	0.00255669	0.0304476
chr3R	12884754	12885861	1108	Peak_9794	565.92	-0.534069	0.177099	0.00256428	0.0304933
chr2L	13512685	13513800	1116	Peak_1589	1229.8	-0.611551	0.202797	0.00256483	0.0304933
chr2R	5024579	5025696	1118	Peak_3034	496.019	0.474906	0.157546	0.00257487	0.0305869
chr3R	2675534	2676013	480	Peak_8528	396.327	-0.631104	0.209403	0.00257971	0.030593
chr3L	4349235	4349778	544	Peak_5834	341.376	-0.709446	0.235391	0.00257913	0.030593
chrX	9776815	9777496	682	Peak_12771	418.539	-0.702471	0.233231	0.00259614	0.030762
chrX	19191036	19191450	415	Peak_13869	199.838	0.77129	0.256111	0.00259922	0.0307727
chr3R	14905000	14906955	1956	Peak_9991	497.393	0.788351	0.261823	0.00260382	0.0308014
chr3R	11280083	11280445	363	Peak_9565	112.384	-1.09914	0.365205	0.00261547	0.0308874
chrX	16827168	16827572	405	Peak_13559	147.047	-1.03382	0.343488	0.00261441	0.0308874
chr2R	20972936	20973660	725	Peak_5173	327.329	0.63646	0.211521	0.00262138	0.0309314
chr3L	18000226	18001221	996	Peak_7543	1204.58	-0.639683	0.212638	0.00262698	0.0309716
chr3L	20928588	20929744	1157	Peak_7911	585.669	0.683515	0.227243	0.00263091	0.0309921
chrX	8767497	8768814	1318	Peak_12651	301.231	1.00987	0.335923	0.00264498	0.0310694
chr3L	1090287	1092217	1931	Peak_5381	1061.57	-0.586788	0.195192	0.00264528	0.0310694
chr3L	15240344	15241031	688	Peak_7170	385.755	-0.72639	0.24161	0.00264315	0.0310694
chr3R	11636042	11636451	410	Peak_9600	242.688	-0.968076	0.322038	0.00264626	0.0310694
chr3R	25603437	25604816	1380	Peak_11178	1084.98	-0.775915	0.258155	0.0026504	0.0310921
chrX	15880478	15881877	1400	Peak_13425	523.12	0.64958	0.216156	0.00265452	0.0311146
chr2R	14228838	14230995	2158	Peak_4266	1373.19	-0.598665	0.199265	0.00266141	0.0311695
chr3L	8068992	8069404	413	Peak_6227	143.527	0.869405	0.289464	0.00266896	0.0312321
chr2R	10854848	10855511	664	Peak_3834	994.07	-0.509006	0.169525	0.00267743	0.0313053
chr3L	14032518	14032849	332	Peak_6989	71.4933	1.08438	0.36121	0.00268154	0.0313177
chr2R	14225011	14226609	1599	Peak_4265	802.726	-0.76957	0.25636	0.00268292	0.0313177
chr2R	3630391	3630755	365	Peak_2843	123.195	0.889989	0.296536	0.00268843	0.0313561
chr3R	9047885	9048527	643	Peak_9273	278.408	0.874819	0.291695	0.00270791	0.0315573
chr3R	20095687	20096277	591	Peak_10617	249.462	0.715864	0.238723	0.00271119	0.0315695
chr2R	20835559	20836225	667	Peak_5144	290.376	0.730234	0.243662	0.00272733	0.0317314
chr3L	7094022	7094355	334	Peak_6110	135.262	0.927734	0.309648	0.00273464	0.0317902
chr2L	10208836	10209371	536	Peak_1232	277.538	0.72463	0.241981	0.0027483	0.0319227
chr2L	9506524	9507038	515	Peak_1152	457.903	-0.760833	0.254166	0.00275849	0.0320148
chrX	13785887	13786638	752	Peak_13215	301.766	0.83646	0.279528	0.00276791	0.0320978
chr2R	15330147	15330771	625	Peak_4408	149.387	1.0113	0.338049	0.0027754	0.0321582
chr2L	9988589	9990262	1674	Peak_1218	1079.14	-0.587061	0.196281	0.00278137	0.032201
chr2R	18892129	18893194	1066	Peak_4857	380.511	0.906445	0.303105	0.00278493	0.0322118
chr2L	16493722	16494048	327	Peak_1895	115.818	0.946559	0.316541	0.00278686	0.0322118
chr2R	9350235	9351047	813	Peak_3632	410.827	-0.685002	0.229195	0.0028014	0.0323534
chr3L	11118701	11119129	429	Peak_6622	120.966	0.769187	0.257433	0.00280889	0.0324104
chrX	6234328	6235265	938	Peak_12342	391.16	-0.591307	0.197914	0.00281092	0.0324104
chrX	13300337	13300671	335	Peak_13163	129.86	0.996957	0.333765	0.00281729	0.0324573
chr3R	8847504	8847792	289	Peak_9262	89.2776	1.00921	0.337946	0.00282372	0.0324785
chr2R	8606337	8607010	674	Peak_3540	282.79	-0.879927	0.294653	0.00282363	0.0324785
chr2R	4533498	4533988	491	Peak_2952	321.038	-0.825889	0.276639	0.00283174	0.0325418
chr2L	4045118	4045948	831	Peak_503	156.906	-1.02481	0.343295	0.00283383	0.0325418
chr2R	2462265	2463066	802	Peak_2674	352.878	-0.913652	0.30631	0.00285651	0.0327757
chr2R	6932637	6934151	1515	Peak_3277	529.573	-0.779613	0.261421	0.00286168	0.0328084
chrX	1374524	1375171	648	Peak_11739	266.26	0.823365	0.276122	0.00286478	0.0328173
chr3R	17684706	17686003	1298	Peak_10328	892.138	-0.438246	0.147046	0.00287935	0.0329575
chrX	13852697	13852981	285	Peak_13222	130.076	1.00682	0.337954	0.00289022	0.0330285
chr2L	16623392	16623721	330	Peak_1917	98.8259	1.02109	0.342739	0.00288997	0.0330285
chr2R	7408574	7409657	1084	Peak_3359	344.032	-0.879878	0.295537	0.00290875	0.0331121
chrX	2436229	2437176	948	Peak_11901	444.682	-0.75369	0.253102	0.00290314	0.0331121
chr3R	2813333	2814532	1200	Peak_8553	640.969	-0.60856	0.204352	0.00290133	0.0331121
chr2R	2927317	2927920	604	Peak_2731	370.014	-0.715596	0.240325	0.00290501	0.0331121
chr3L	19697875	19698546	672	Peak_7763	515.362	-0.727385	0.244342	0.0029116	0.0331121
chr2L	6078654	6079445	792	Peak_727	326.83	-0.911542	0.30618	0.00290946	0.0331121
chr2R	20880189	20880701	513	Peak_5156	112.861	1.05153	0.35326	0.00291416	0.0331146
chr3L	13260587	13260997	411	Peak_6935	110.408	-0.941094	0.316211	0.00291888	0.0331416
chr3L	14195265	14195881	617	Peak_7015	662.113	-0.550114	0.18488	0.00292493	0.033157
chr2L	14528878	14529396	519	Peak_1711	286.475	-0.663348	0.222923	0.00292335	0.033157
chr3L	13476287	13476669	383	Peak_6952	92.8631	1.08394	0.364321	0.00292758	0.0331604
chr3R	23814728	23815151	424	Peak_11006	159.541	-0.775189	0.260597	0.00293305	0.0331958
chrX	17419634	17420128	495	Peak_13626	159.864	0.856152	0.28796	0.00294752	0.033285
chr3R	25583694	25584103	410	Peak_11169	133.236	-0.777167	0.261399	0.00294799	0.033285
chr2L	18741526	18742120	595	Peak_2082	276.217	-0.89169	0.299905	0.00294671	0.033285
chrX	4358582	4359227	646	Peak_12141	307.259	0.794741	0.267438	0.00296168	0.0333129
chrX	1970785	1971645	861	Peak_11817	417.935	0.639846	0.21528	0.00295719	0.0333129
chrX	4483157	4484641	1485	Peak_12165	983.943	-0.530691	0.178586	0.00296225	0.0333129
chr2L	18463660	18464594	935	Peak_2033	854.287	-0.618417	0.20804	0.00295294	0.0333129
chr3L	13120778	13121616	839	Peak_6915	261.579	-0.997219	0.335553	0.00295994	0.0333129
chr3L	22861975	22862372	398	Peak_8163	102.432	1.04997	0.353379	0.00296612	0.0333299
chr2L	21243749	21244654	906	Peak_2390	871.571	-0.560745	0.188749	0.00296985	0.0333454
chr2L	1412154	1413615	1462	Peak_193	542.225	-0.948553	0.319361	0.00297649	0.0333933
chr3R	23115492	23116040	549	Peak_10961	153.431	0.786365	0.264811	0.00298258	0.0334351
chrX	1165618	1166067	450	Peak_11710	151.547	0.781909	0.26343	0.00299569	0.0335074
chr3R	7580036	7580307	272	Peak_9138	60.6034	1.14436	0.38552	0.00299398	0.0335074
chrX	3240208	3241930	1723	Peak_11999	735.908	-0.520262	0.175282	0.00299614	0.0335074
chr3L	12107272	12107771	500	Peak_6763	137.755	-0.838196	0.282443	0.00300073	0.0335323
chrX	3303610	3303944	335	Peak_12018	139.524	0.951187	0.320624	0.00301037	0.0336134
chr3L	203506	204184	679	Peak_5212	279.156	0.731411	0.246759	0.00303601	0.0338714
chr2R	19864333	19864998	666	Peak_4999	242.933	0.607662	0.205027	0.00303843	0.0338714
chr2R	19674901	19675504	604	Peak_4962	317.846	-0.631682	0.213158	0.0030421	0.0338714
chr3L	10780623	10781241	619	Peak_6548	160.815	-0.927919	0.313131	0.00304306	0.0338714
chr2L	7611629	7612222	594	Peak_928	141.179	-0.969573	0.327226	0.0030465	0.033883
chr3R	26133254	26134523	1270	Peak_11263	288.568	0.818494	0.276326	0.00305587	0.0338891
chrX	3321347	3321905	559	Peak_12022	324.635	-0.805451	0.271928	0.00305647	0.0338891
chr2L	1408534	1410268	1735	Peak_192	1052.05	-0.667418	0.225305	0.00305361	0.0338891
chr3R	25388986	25389664	679	Peak_11147	202.652	-0.896198	0.302567	0.00305664	0.0338891
chr2L	4801546	4802301	756	Peak_571	455.587	0.890148	0.300576	0.00306171	0.0339188
chr3R	12939522	12939819	298	Peak_9804	95.6919	0.780929	0.263777	0.00307081	0.033993
chrX	19682051	19683122	1072	Peak_13958	464.664	-0.652904	0.220572	0.00307597	0.0340234
chrX	14881859	14882357	499	Peak_13312	145.054	1.00582	0.339927	0.00308715	0.0340826
chr2R	3669839	3670976	1138	Peak_2854	715.788	0.646263	0.218422	0.00308856	0.0340826
chr3R	9615339	9616656	1318	Peak_9336	826.226	-1.10712	0.374138	0.00308507	0.0340826
chr3L	2548258	2548865	608	Peak_5566	161.812	-0.991342	0.335085	0.00309158	0.0340893
chr3R	16890622	16891200	579	Peak_10188	361.718	0.597071	0.201912	0.00310564	0.0341911
chr2R	7496778	7497289	512	Peak_3386	203.231	-0.87996	0.297573	0.00310526	0.0341911
chr3R	4498075	4499113	1039	Peak_8749	169.291	1.0613	0.359193	0.00312984	0.0344307
chrX	6438549	6439375	827	Peak_12358	533.432	0.841124	0.284712	0.00313381	0.0344476
chr2R	15909826	15911008	1183	Peak_4479	588.947	-0.724143	0.245145	0.00313741	0.0344603
chr3R	1920891	1921486	596	Peak_8436	300.416	-0.737166	0.249641	0.00314801	0.0345499
chr2L	19528324	19528801	478	Peak_2194	162.289	1.12427	0.381089	0.00317612	0.034572
chrX	9390961	9391656	696	Peak_12730	890.398	0.780807	0.264603	0.0031689	0.034572
chr3R	12099332	12099789	458	Peak_9682	171.719	0.848602	0.287556	0.00316657	0.034572
chrX	15640625	15641286	662	Peak_13393	274.211	0.746006	0.252756	0.0031625	0.034572
chrX	8975802	8976262	461	Peak_12680	155.456	0.797387	0.27021	0.00316754	0.034572
chr3R	11051691	11052043	353	Peak_9526	96.9067	0.937508	0.317795	0.00317731	0.034572
chrX	19208519	19209411	893	Peak_13874	453.608	-0.65023	0.220429	0.00317937	0.034572
chr3L	13059686	13060180	495	Peak_6902	150.649	-0.965829	0.327305	0.00316902	0.034572
chrX	9544199	9545709	1511	Peak_12749	1457.01	-0.527399	0.178634	0.00315309	0.034572
chr3R	814785	816176	1392	Peak_8293	515.882	-0.700765	0.237445	0.0031647	0.034572
chr2L	17267916	17268776	861	Peak_1967	981.506	-0.73405	0.24877	0.00317033	0.034572
chr2L	18001992	18002546	555	Peak_1998	124.602	-1.02647	0.347917	0.00317435	0.034572
chr2R	11782823	11783213	391	Peak_3953	131.28	-0.858095	0.290983	0.00318849	0.0346446
chr3R	9463968	9464367	400	Peak_9315	62.3695	1.14993	0.3901	0.00320069	0.0347504
chrX	11232079	11232649	571	Peak_12913	183.804	-0.826539	0.280447	0.00320643	0.0347859
chr2R	6419662	6420196	535	Peak_3211	114.944	0.978573	0.332107	0.00321331	0.0348339
chrX	11271956	11272522	567	Peak_12922	268.307	0.983482	0.333802	0.00321595	0.0348357
chr2R	20452585	20453314	730	Peak_5087	270.617	0.680843	0.231144	0.00322388	0.0348683
chr3L	14699481	14700079	599	Peak_7096	768.904	-0.721936	0.245076	0.00322161	0.0348683
chr2R	3037451	3038977	1527	Peak_2751	1228.56	-0.576815	0.195879	0.00323217	0.0349044
chrX	4458180	4458524	345	Peak_12159	130.381	-0.942298	0.319978	0.00323077	0.0349044
chr2L	21255562	21255804	243	Peak_2394	113.551	0.919634	0.312446	0.00324697	0.0350375
chrX	17225893	17226479	587	Peak_13604	275.074	-0.901412	0.306292	0.00325067	0.0350507
chr3R	3341333	3341676	344	Peak_8627	124.328	1.02987	0.349996	0.00325547	0.0350757
chr3R	19539291	19540068	778	Peak_10524	299.454	-0.939612	0.319393	0.00326234	0.035123
chrX	8411908	8413159	1252	Peak_12609	1128.33	0.671884	0.228409	0.00326534	0.0351285
chr3R	25084977	25085189	213	Peak_11101	97.8346	0.976705	0.332153	0.00327656	0.0351521
chr3R	18552519	18553375	857	Peak_10429	404.887	0.678274	0.230684	0.00327924	0.0351521
chr2R	8065440	8066288	849	Peak_3474	246.384	0.683338	0.23234	0.00327039	0.0351521
chr3R	7441288	7441932	645	Peak_9118	294.398	-0.96929	0.329621	0.00327555	0.0351521
chr2R	11386079	11386641	563	Peak_3901	234.968	-0.801997	0.272769	0.00327997	0.0351521
chr3R	12039793	12040545	753	Peak_9656	311.266	0.789038	0.268403	0.0032848	0.0351772
chr2R	3680476	3681064	589	Peak_2857	215.746	0.670871	0.228233	0.00328837	0.0351888
chr3R	9829505	9830163	659	Peak_9381	329.057	0.915279	0.311451	0.00329532	0.0351895
chr3R	15079664	15080210	547	Peak_10019	302.094	-0.601311	0.204618	0.00329591	0.0351895
chr3R	26114760	26115400	641	Peak_11260	213.7	-0.904928	0.307922	0.00329466	0.0351895
chr3L	17951206	17951672	467	Peak_7525	141.43	1.01037	0.34388	0.00330197	0.0352277
chr3R	27880337	27880638	302	Peak_11460	64.2235	1.04337	0.355191	0.00330882	0.0352741
chr3R	11073094	11073598	505	Peak_9531	140.652	0.899744	0.306346	0.0033139	0.0353016
chr2L	12001919	12002461	543	Peak_1425	197.697	0.775401	0.26408	0.00332222	0.0353114
chr3R	21705889	21706223	335	Peak_10787	171.862	0.618504	0.210667	0.00332544	0.0353114
chr3L	6344836	6345874	1039	Peak_6022	830.576	-0.63612	0.216693	0.00332925	0.0353114
chr2R	19124478	19125981	1504	Peak_4893	556.778	-0.701289	0.238834	0.00332151	0.0353114
chr3R	17285665	17286121	457	Peak_10252	388.987	-0.884265	0.301187	0.00332542	0.0353114
chr2L	13874081	13874590	510	Peak_1622	197.022	-0.834334	0.284219	0.0033298	0.0353114
chr3L	19629615	19630609	995	Peak_7743	624.989	0.581387	0.198094	0.00333648	0.035334
chr2R	7396016	7397082	1067	Peak_3356	497.939	-0.724541	0.246893	0.00333943	0.035334
chr2R	17637579	17637967	389	Peak_4708	121.609	-0.973989	0.331885	0.00333853	0.035334
chr2R	7462957	7463550	594	Peak_3372	437.697	-0.630016	0.214759	0.00335065	0.0354262
chr2L	1116612	1118486	1875	Peak_173	1206.82	-0.497541	0.169864	0.00339997	0.0359207
chr2R	10769436	10769763	328	Peak_3821	122.44	0.820091	0.280142	0.00341798	0.036084
chr3L	230005	230831	827	Peak_5222	276.683	0.978265	0.33424	0.0034243	0.0360969
chrX	6434027	6434973	947	Peak_12355	603.164	-0.672153	0.229639	0.00342247	0.0360969
chrX	4914972	4915827	856	Peak_12202	320.016	0.932984	0.318866	0.00343415	0.0360978
chr2L	6411913	6412430	518	Peak_752	209.841	0.845404	0.288938	0.0034346	0.0360978
chr2R	9912037	9913118	1082	Peak_3711	1377.04	-0.635971	0.217335	0.00343096	0.0360978
chr2R	11786607	11787543	937	Peak_3955	507.63	-0.779533	0.266417	0.00343358	0.0360978
chr2L	14490050	14491178	1129	Peak_1698	2706.89	-0.605487	0.206973	0.00343967	0.0361242
chr3L	7106023	7106788	766	Peak_6113	180.568	-0.882745	0.301787	0.00344392	0.036142
chr2R	20677238	20677479	242	Peak_5116	85.7934	0.928375	0.317575	0.00346318	0.0362633
chr3L	229546	229952	407	Peak_5221	152.279	0.995588	0.340557	0.00346224	0.0362633
chr3L	22369720	22371161	1442	Peak_8104	473.935	-0.806862	0.275968	0.00345838	0.0362633
chr2L	14261014	14261511	498	Peak_1654	171.624	-0.962216	0.329201	0.00346804	0.0362874
chr3L	1244797	1245183	387	Peak_5399	88.833	1.0916	0.373505	0.00347127	0.0362943
chr3L	6393225	6393906	682	Peak_6037	912.893	-0.549491	0.188066	0.00348011	0.0363567
chr3L	17600984	17602404	1421	Peak_7485	463.17	-1.11737	0.382452	0.00348238	0.0363567
chr2R	2417177	2418155	979	Peak_2659	1089.89	-0.707974	0.242356	0.0034867	0.0363749
chr2L	11003375	11003659	285	Peak_1315	80.7433	1.11518	0.381819	0.00349249	0.0364084
chr2L	6252341	6253222	882	Peak_745	440.29	-0.72504	0.24828	0.0034975	0.0364338
chrX	6627463	6628055	593	Peak_12391	196.114	0.7838	0.268435	0.00350155	0.0364491
chrX	7465024	7465838	815	Peak_12497	219.349	-0.85266	0.292087	0.00350937	0.0365036
chrX	2035229	2036218	990	Peak_11835	575.693	0.51352	0.175987	0.00352349	0.0365698
chr2R	7703214	7703775	562	Peak_3423	300.2	-0.717253	0.245793	0.00352151	0.0365698
chr2L	1568598	1569494	897	Peak_221	345.048	-0.677735	0.232255	0.00352207	0.0365698
chr2R	17382247	17383456	1210	Peak_4654	484.085	-0.706157	0.242062	0.00353124	0.0366233
chr3L	7564095	7564613	519	Peak_6154	287.601	0.885992	0.303799	0.00354124	0.0366732
chrX	8188049	8188552	504	Peak_12589	415.984	0.94629	0.32447	0.00354074	0.0366732
chr2L	6019270	6020290	1021	Peak_717	1021.61	-0.716032	0.245569	0.00354769	0.0366862
chr2R	8789245	8789792	548	Peak_3562	208.541	-1.00935	0.346156	0.00354671	0.0366862
chr3L	22127594	22128540	947	Peak_8078	654.178	-0.573095	0.196579	0.00355296	0.0366871
chrX	980847	981578	732	Peak_11674	398.845	-0.619161	0.212365	0.00355065	0.0366871
chr2L	16806903	16807704	802	Peak_1938	1005.89	-0.551156	0.189117	0.00356416	0.0367759
chrX	6746301	6746924	624	Peak_12411	234.075	0.621181	0.213211	0.00357452	0.0368559
chr2R	2122519	2123978	1460	Peak_2636	3575.72	-0.743988	0.255392	0.0035783	0.0368679
chr2R	7400434	7401214	781	Peak_3357	282.515	-0.63233	0.217124	0.00358779	0.0369388
chr2L	21811846	21812230	385	Peak_2443	111.63	-0.99167	0.340555	0.00359211	0.0369564
chr3L	10435253	10435906	654	Peak_6490	213.944	0.91619	0.314689	0.00359799	0.03699
chr2L	13878666	13879205	540	Peak_1624	568.85	-0.493799	0.16963	0.00360226	0.037007
chr3R	7600997	7601531	535	Peak_9144	171.003	-0.810784	0.278612	0.00361326	0.037093
chr3R	3476520	3476882	363	Peak_8631	94.1003	-1.02663	0.352863	0.00362085	0.037144
chrX	11457580	11457961	382	Peak_12949	87.0866	1.01593	0.349372	0.00363894	0.0373024
chr2L	19120700	19121064	365	Peak_2130	188.161	0.711893	0.24485	0.00364373	0.0373244
chr2L	155314	155794	481	Peak_30	230.064	0.57301	0.197154	0.00365612	0.0374243
chr2R	10298867	10299502	636	Peak_3768	255.358	0.621983	0.214053	0.00366386	0.0374764
chr3L	8865048	8865632	585	Peak_6343	112.629	-0.984182	0.338755	0.00366916	0.0375034
chr2L	7911096	7911951	856	Peak_961	444.247	-0.77137	0.265539	0.00367341	0.0375198
chr2R	7126736	7127016	281	Peak_3324	98.5358	0.710794	0.244843	0.00369533	0.037649
chrX	10451057	10451986	930	Peak_12834	1093.4	-0.631608	0.217548	0.00369242	0.037649
chr2R	18286742	18288371	1630	Peak_4784	1671.53	-0.629488	0.216845	0.00369672	0.037649
chr3L	6317697	6318171	475	Peak_6019	138.64	-0.751583	0.25887	0.0036923	0.037649
chr3L	20388532	20388939	408	Peak_7827	169.076	0.832335	0.286774	0.0037031	0.0376869
chr3R	25104844	25105364	521	Peak_11106	308.716	-0.668364	0.230352	0.00371385	0.037769
chr2R	2418326	2419014	689	Peak_2660	587.834	-0.881053	0.303715	0.00372068	0.0378113
chr3L	14241614	14242099	486	Peak_7021	132.309	-1.03921	0.358283	0.00372526	0.0378306
chr3R	3274726	3275198	473	Peak_8621	138.08	1.02001	0.351848	0.00374342	0.0379333
chr3R	15221266	15221558	293	Peak_10051	86.1946	0.975495	0.336472	0.00374136	0.0379333
chr3R	5164479	5165730	1252	Peak_8847	721.27	-0.669226	0.230841	0.00374269	0.0379333
chr2L	20956127	20957849	1723	Peak_2341	1024.65	-0.567673	0.195917	0.00376126	0.0380867
chr3L	15090168	15090614	447	Peak_7127	78.2611	1.08322	0.374017	0.00377723	0.0381665
chr2R	9348575	9349492	918	Peak_3631	259.933	-0.878711	0.303375	0.00377414	0.0381665
chr3L	4307560	4308270	711	Peak_5830	429.479	-0.735852	0.254063	0.0037755	0.0381665
chr2R	8807236	8807817	582	Peak_3567	98.2294	1.09159	0.376976	0.00378385	0.038206
chr3L	21048030	21048545	516	Peak_7936	226.44	0.932994	0.322389	0.00380371	0.0382761
chrX	8794054	8794477	424	Peak_12659	172.971	0.772421	0.266906	0.00380397	0.0382761
chr2L	10259933	10261284	1352	Peak_1239	678.357	0.467141	0.161415	0.00380319	0.0382761
chr3R	15154307	15155137	831	Peak_10044	755.035	-0.818092	0.282633	0.0037972	0.0382761
chr3R	25588453	25589424	972	Peak_11171	316.993	-0.864965	0.298888	0.00380433	0.0382761
chr2L	11196733	11197208	476	Peak_1352	255.256	-0.813289	0.281054	0.00380715	0.0382773
chr3L	2411324	2412296	973	Peak_5549	626.052	-0.71248	0.246307	0.00382008	0.03838
chr2R	4219065	4219491	427	Peak_2924	115.561	-0.893369	0.308904	0.00382722	0.0384207
chr3R	22757770	22758405	636	Peak_10901	259.678	-0.802156	0.277405	0.00383228	0.0384207
chr3R	7602798	7606828	4031	Peak_9145	4256.94	-0.513773	0.177662	0.00382979	0.0384207
chrX	3614080	3615018	939	Peak_12051	536.289	0.57599	0.199208	0.00383533	0.0384239
chr3R	5064398	5064825	428	Peak_8837	99.1326	1.0904	0.377251	0.00384777	0.0385213
chr3R	6411399	6413797	2399	Peak_9027	1519.45	-0.616807	0.213427	0.0038523	0.0385394
chr3R	6998481	6998876	396	Peak_9082	158.623	0.902872	0.312558	0.00386898	0.0386515
chr3R	24455021	24455456	436	Peak_11028	179.379	-0.926898	0.320863	0.00386751	0.0386515
chr4	157445	157847	403	Peak_11476	166.746	-0.987763	0.341975	0.00387198	0.0386542
chr2L	1152231	1152453	223	Peak_178	58.5873	1.07372	0.371935	0.00389118	0.0387364
chr2L	18735610	18736166	557	Peak_2080	385.709	-0.671109	0.232418	0.00388302	0.0387364
chr2L	5492636	5493722	1087	Peak_672	514.309	-0.903946	0.313121	0.00389071	0.0387364
chr2L	11051847	11053763	1917	Peak_1330	1791.55	-0.612362	0.212115	0.00389014	0.0387364
chr3R	6659869	6661396	1528	Peak_9064	1021.65	-0.560112	0.194041	0.00389475	0.0387447
chr3R	12589328	12590185	858	Peak_9759	1536.52	-0.676414	0.234371	0.00390075	0.0387771
chrX	6635077	6636365	1289	Peak_12394	470.978	0.659063	0.228458	0.00391631	0.0389044
chr2L	11607807	11608340	534	Peak_1406	179.864	-1.01386	0.351507	0.00392243	0.0389105
chr2L	3498881	3499809	929	Peak_433	341.954	-0.777977	0.269722	0.00392201	0.0389105
chr2L	5949214	5949659	446	Peak_704	204.407	0.660136	0.228899	0.0039271	0.0389295
chr2R	5577528	5577811	284	Peak_3103	49.4125	1.11208	0.385672	0.00393286	0.0389593
chr2R	6763044	6763484	441	Peak_3266	156.437	0.636526	0.220805	0.00394222	0.0390247
chr2L	20858452	20859350	899	Peak_2323	317.956	0.783728	0.271909	0.00394771	0.0390516
chr3L	16273132	16273668	537	Peak_7300	424.412	-0.688573	0.238996	0.00396277	0.0391732
chr3L	21272907	21273527	621	Peak_7967	250.614	0.686868	0.238504	0.003978	0.0392963
chr2R	18065717	18067502	1786	Peak_4748	2695.91	-0.576705	0.200276	0.00398244	0.0393127
chr2R	4132035	4132376	342	Peak_2913	103.3	-0.947089	0.328964	0.00398934	0.0393259
chr2L	722946	724272	1327	Peak_141	807.433	-0.732952	0.254575	0.00398783	0.0393259
chr3R	25492877	25493229	353	Peak_11156	123.035	0.923023	0.320655	0.00399501	0.0393543
chrX	1370605	1371376	772	Peak_11737	386.157	0.612443	0.212879	0.00401536	0.0395273
chr3R	19426951	19427641	691	Peak_10516	931.652	-0.575851	0.2002	0.00402257	0.0395707
chrX	20045304	20045628	325	Peak_13978	98.7298	-0.872739	0.303481	0.0040306	0.0396221
chrX	12785159	12786411	1253	Peak_13089	1028.71	-0.607706	0.211464	0.00405567	0.0398408
chr2R	17027587	17028435	849	Peak_4613	679.052	-0.652954	0.227267	0.004065	0.0399047
chr3L	829333	829665	333	Peak_5362	74.9817	1.00007	0.348114	0.0040681	0.0399074
chrX	9920113	9920714	602	Peak_12786	259.855	-0.993105	0.345809	0.004081	0.0399785
chr3R	7951186	7951706	521	Peak_9189	178.156	-0.767024	0.267069	0.00407879	0.0399785
chr2R	9112325	9113125	801	Peak_3612	842.951	-0.597701	0.208205	0.00409512	0.0400891
chr2R	11904425	11904837	413	Peak_3974	192.689	0.740459	0.258039	0.00411042	0.0401368
chr3L	18232187	18232997	811	Peak_7601	694.552	-0.498153	0.173594	0.00410932	0.0401368
chr2R	4915725	4916794	1070	Peak_3012	926.708	-0.692346	0.241259	0.00410836	0.0401368
chr2R	10307336	10307866	531	Peak_3770	274.295	-0.65556	0.228459	0.00411135	0.0401368
chr3L	8350009	8350442	434	Peak_6261	71.7023	1.05919	0.369223	0.0041215	0.0401804
chrX	22229174	22230050	877	Peak_14128	239.961	-0.859129	0.299475	0.00412053	0.0401804
chr2R	7775132	7775335	204	Peak_3432	59.0426	1.10989	0.386992	0.00413086	0.0402438
chr3L	839592	840009	418	Peak_5366	143.21	0.754629	0.263198	0.00414176	0.0403036
chr2L	9451380	9452188	809	Peak_1144	715.376	-0.545086	0.190123	0.00414354	0.0403036
chr3L	16469894	16470801	908	Peak_7327	592.914	-0.531446	0.185375	0.00414554	0.0403036
chrX	16017837	16018649	813	Peak_13440	416.886	0.691916	0.241376	0.00414969	0.0403162
chrX	11650794	11651090	297	Peak_12975	92.5692	1.0339	0.360812	0.0041636	0.0403681
chr3R	276367	276856	490	Peak_8228	214.412	0.655052	0.228597	0.00416314	0.0403681
chr3L	21876166	21876821	656	Peak_8056	184.034	-0.959934	0.334994	0.00416319	0.0403681
chr2R	17476899	17477645	747	Peak_4681	458.651	-0.711124	0.248211	0.00417015	0.0404039
chr2R	15504460	15504981	522	Peak_4423	219.799	-0.860917	0.300539	0.00417573	0.0404302
chr3R	10152951	10153310	360	Peak_9420	158.612	0.724431	0.252939	0.00418264	0.0404694
chr3L	566287	566639	353	Peak_5284	98.2799	-0.968425	0.338223	0.00419289	0.0405408
chrX	5780731	5783093	2363	Peak_12270	2587.63	-0.659577	0.230437	0.00420595	0.0406116
chr3L	15167481	15167930	450	Peak_7144	179.57	-0.907147	0.316913	0.00420377	0.0406116
chr2L	12838647	12839133	487	Peak_1520	138.319	-0.876328	0.306337	0.00422752	0.0407919
chrX	16026813	16027717	905	Peak_13442	329.297	-0.715426	0.250114	0.00423107	0.0407983
chr3L	18202629	18203886	1258	Peak_7587	843.827	0.811054	0.283582	0.0042359	0.0408171
chr3R	23048699	23049223	525	Peak_10948	337.212	0.675316	0.236271	0.00426016	0.040995
chr2R	2975785	2977818	2034	Peak_2739	1119.12	-0.598893	0.209517	0.00425726	0.040995
chr2L	14022328	14022710	383	Peak_1639	161.966	-0.783772	0.274278	0.00426884	0.0410506
chr3R	17218612	17219087	476	Peak_10241	238.891	-0.792618	0.277478	0.00428329	0.0411615
chr2R	2391862	2393414	1553	Peak_2649	442.157	-0.586591	0.20537	0.00428668	0.0411661
chr3L	3037866	3038585	720	Peak_5619	291.697	0.925866	0.324286	0.00430246	0.0412896
chr2R	11693951	11694410	460	Peak_3936	191.937	0.885818	0.31032	0.00431009	0.0413348
chrX	13284757	13285249	493	Peak_13158	204.691	0.986266	0.345709	0.00433252	0.0415081
chr3R	9808936	9809873	938	Peak_9375	787.237	-0.759809	0.266471	0.00435307	0.0415081
chr3R	17766421	17767953	1533	Peak_10342	810.994	-0.82319	0.288674	0.0043496	0.0415081
chr3R	21057899	21059059	1161	Peak_10726	588.005	-0.771092	0.270427	0.00435288	0.0415081
chr3R	10478811	10479531	721	Peak_9471	454.515	-0.738286	0.258903	0.00435014	0.0415081
chrX	1864352	1865164	813	Peak_11799	385.438	-0.709489	0.248833	0.00435454	0.0415081
chr3R	22314952	22315450	499	Peak_10859	123.298	-1.02238	0.358461	0.00434265	0.0415081
chr3R	3780028	3780493	466	Peak_8643	189.965	-0.96632	0.338909	0.00435459	0.0415081
chr3L	8149563	8150351	789	Peak_6241	404.159	-0.629026	0.220572	0.00434733	0.0415081
chrX	12472966	12474879	1914	Peak_13042	2052.32	-0.464669	0.162993	0.00436029	0.0415344
chr2L	6178833	6179524	692	Peak_737	340.926	-0.805486	0.282582	0.00436576	0.0415585
chr3R	2748061	2748557	497	Peak_8536	165.835	-0.989368	0.347315	0.00439094	0.041742
chr2L	14392251	14393354	1104	Peak_1675	550.223	-0.777492	0.272918	0.0043883	0.041742
chrX	5662929	5663450	522	Peak_12259	469.817	-0.4785	0.168066	0.00441207	0.0419147
chr3L	8704483	8705244	762	Peak_6320	209.95	-0.855996	0.300712	0.0044194	0.0419561
chr3R	18023312	18024164	853	Peak_10380	402.472	-0.778635	0.27367	0.00443886	0.0421126
chr2R	11748725	11749477	753	Peak_3946	350.397	0.542065	0.190573	0.00444959	0.0421861
chr3L	16893722	16894203	482	Peak_7400	229.509	0.592375	0.208348	0.00446635	0.0423157
chr3R	13028266	13028806	541	Peak_9813	383.22	-0.604685	0.212693	0.00446926	0.0423157
chrX	12404593	12405938	1346	Peak_13038	1036.11	-0.614661	0.216288	0.00448499	0.0423919
chr2L	3354635	3355499	865	Peak_417	510.959	-0.590069	0.207649	0.00448786	0.0423919
chr2R	6437029	6437477	449	Peak_3219	166.571	-0.754595	0.265577	0.00449242	0.0423919
chr3L	6999140	6999591	452	Peak_6105	161.26	-0.786088	0.276681	0.00449529	0.0423919
chr3L	4270961	4271420	460	Peak_5821	234.946	-0.823547	0.289788	0.00448469	0.0423919
chr3R	22728721	22729161	441	Peak_10896	164.984	-0.945363	0.332696	0.00448988	0.0423919
chr2L	9203266	9203882	617	Peak_1127	895.543	-0.496614	0.174825	0.00450236	0.0424303
chr3L	22436855	22438369	1515	Peak_8127	834.547	-0.736977	0.259481	0.00450868	0.0424615
chr3L	8452593	8455073	2481	Peak_6276	2558.27	-0.750212	0.264163	0.00451187	0.0424633
chr3R	18956091	18957233	1143	Peak_10451	395.089	0.657119	0.231419	0.00451811	0.0424937
chr2R	4531607	4532930	1324	Peak_2951	532.399	-0.650962	0.229275	0.00452245	0.0425063
chrX	793365	794039	675	Peak_11654	319.657	0.747479	0.263297	0.00452662	0.0425172
chr3R	12543390	12544457	1068	Peak_9753	315.567	-0.790327	0.278425	0.00453178	0.0425374
chrX	22235028	22235509	482	Peak_14130	156.506	-0.90126	0.317601	0.00454387	0.0426225
chrX	6600744	6601210	467	Peak_12386	175.566	0.835888	0.294678	0.00455944	0.0427305
chr3L	16744468	16744794	327	Peak_7367	87.0117	-0.930971	0.328214	0.00456142	0.0427305
chr2R	18569073	18570140	1068	Peak_4825	550.327	0.644072	0.227172	0.00458014	0.0428774
chrX	15030931	15031670	740	Peak_13332	242.903	0.781133	0.27563	0.00459713	0.0429511
chr3R	21452329	21452892	564	Peak_10763	220.081	0.735492	0.259501	0.00459327	0.0429511
chrX	13131581	13131992	412	Peak_13119	184	-0.783488	0.276457	0.00459649	0.0429511
chr2L	106469	106828	360	Peak_19	201.271	0.728132	0.25697	0.00460367	0.0429554
chrX	17007589	17007892	304	Peak_13574	75.2186	-1.03245	0.364343	0.00460081	0.0429554
chr3L	311459	311954	496	Peak_5236	172.094	0.79026	0.278921	0.00460744	0.0429572
chr3L	17970881	17971610	730	Peak_7534	346.478	-1.09072	0.384993	0.00460994	0.0429572
chr2L	220243	220844	602	Peak_39	530.013	0.675227	0.238377	0.00461711	0.0429957
chr2L	6563049	6563583	535	Peak_782	99.0334	1.03277	0.364659	0.00462346	0.0429982
chr3R	19227051	19227717	667	Peak_10497	418.803	-0.748873	0.264413	0.00462283	0.0429982
chr2R	17181601	17182035	435	Peak_4631	133.075	0.842216	0.297624	0.00465774	0.0432601
chr3L	21904385	21904899	515	Peak_8062	149.186	-0.972115	0.343523	0.00465715	0.0432601
chrX	2878011	2878380	370	Peak_11950	99.1824	-0.960511	0.339551	0.0046728	0.0433588
chr3L	14970392	14971176	785	Peak_7114	472.684	-0.647901	0.22905	0.00467451	0.0433588
chr3L	742369	743489	1121	Peak_5331	444.199	-0.793268	0.280538	0.00468893	0.0434128
chr2R	9828286	9828964	679	Peak_3690	459.687	-0.600306	0.212301	0.00468954	0.0434128
chrX	12988064	12988710	647	Peak_13100	407.391	-0.553025	0.19557	0.00468738	0.0434128
chr3L	15246994	15247700	707	Peak_7172	329.885	0.765263	0.270844	0.00472104	0.0435389
chr2L	8082497	8086149	3653	Peak_989	2898.31	0.531119	0.188017	0.00473045	0.0435389
chr2R	11105686	11106111	426	Peak_3868	178.954	0.646207	0.228761	0.00473088	0.0435389
chr3R	23054016	23054538	523	Peak_10950	220.313	0.785574	0.277985	0.00471388	0.0435389
chr2R	9891870	9892599	730	Peak_3707	472.942	-0.724914	0.256613	0.00472907	0.0435389
chr3L	10847116	10851171	4056	Peak_6561	4375.1	-0.440195	0.155805	0.00472374	0.0435389
chr2L	19357829	19358572	744	Peak_2166	214.962	-1.00925	0.357185	0.00471992	0.0435389
chrX	2192762	2193717	956	Peak_11863	658.533	-0.660036	0.233571	0.00471552	0.0435389
chr2R	6100667	6101049	383	Peak_3179	80.5706	-1.07204	0.379467	0.00472639	0.0435389
chr3R	1451296	1451682	387	Peak_8399	85.6825	0.99752	0.353289	0.00474993	0.0436858
chrX	11341475	11342311	837	Peak_12927	282.949	0.792283	0.280675	0.00476101	0.0437592
chr2L	11373700	11374095	396	Peak_1378	129.909	-0.850836	0.301453	0.00476579	0.0437746
chr3R	4879923	4881014	1092	Peak_8818	576.15	0.681719	0.241644	0.00478494	0.0438935
chrX	14740035	14740506	472	Peak_13295	318.695	-0.808077	0.286428	0.00478415	0.0438935
chr3R	15101644	15102345	702	Peak_10023	313.617	0.777205	0.275545	0.00479322	0.0439124
chrX	984528	985417	890	Peak_11675	446.379	-0.689012	0.244274	0.00479262	0.0439124
chr3R	21865204	21866634	1431	Peak_10812	714.145	0.561446	0.199091	0.00480159	0.0439607
chrX	17226714	17227911	1198	Peak_13605	392.42	-0.739724	0.262401	0.00481648	0.0440685
chr2R	5769471	5770051	581	Peak_3123	220.475	0.572678	0.203224	0.00483295	0.0441906
chr3L	9393667	9393911	245	Peak_6396	69.7025	0.973429	0.345487	0.00483904	0.0442029
chrX	8603166	8603955	790	Peak_12634	467.238	-0.809239	0.287223	0.00484056	0.0442029
chr2R	18687503	18687932	430	Peak_4834	87.6321	0.942867	0.334828	0.0048629	0.0443295
chr3L	22183895	22186446	2552	Peak_8089	1810.34	-0.514937	0.18286	0.00486231	0.0443295
chr2L	1458436	1459583	1148	Peak_206	659.74	-0.76504	0.271684	0.00486383	0.0443295
chrX	4875708	4876251	544	Peak_12194	183.301	0.890176	0.316335	0.00489244	0.0445615
chr3L	10345315	10345773	459	Peak_6479	161.147	-0.906805	0.322274	0.00489639	0.0445689
chrX	16512713	16513183	471	Peak_13507	173.852	0.658794	0.23418	0.00490522	0.0445918
chr2L	18015599	18016108	510	Peak_2001	228.789	-0.736187	0.261678	0.00490319	0.0445918
chr2L	7340015	7340698	684	Peak_892	581.826	-0.657715	0.233838	0.00491287	0.0446039
chr3L	18246253	18246748	496	Peak_7605	181.006	-0.72445	0.257562	0.00491246	0.0446039
chr3L	14056194	14056423	230	Peak_6997	116.522	0.865866	0.307936	0.00492602	0.0446946
chr3L	13915301	13916264	964	Peak_6968	450.54	0.756469	0.269202	0.00495355	0.0448868
chr2L	18880974	18882022	1049	Peak_2104	2578.62	-0.708773	0.252216	0.00495131	0.0448868
chrX	12630993	12632062	1070	Peak_13075	1105.76	0.561061	0.199701	0.00496185	0.0449332
chrX	12401485	12402409	925	Peak_13037	438.16	-0.464788	0.165448	0.00496542	0.0449367
chr3R	21825143	21825696	554	Peak_10796	163.386	0.900086	0.320463	0.00497418	0.0449872
chr3L	1064087	1064506	420	Peak_5378	121.887	-0.910323	0.324133	0.00497756	0.044989
chr3R	2718753	2719687	935	Peak_8530	1268.29	-0.473479	0.168615	0.00498438	0.0450219
chr2R	18785407	18787066	1660	Peak_4846	915.683	0.698942	0.248971	0.00499557	0.0450391
chr3R	9654809	9655996	1188	Peak_9345	329.659	0.812774	0.289539	0.00499843	0.0450391
chr2R	7081720	7083134	1415	Peak_3317	2136.14	-0.63822	0.227315	0.00499054	0.0450391
chrX	4369023	4369644	622	Peak_12145	223.047	-0.858716	0.305909	0.00499904	0.0450391
chr2R	13480009	13481218	1210	Peak_4154	659.584	0.519072	0.184942	0.0050056	0.0450695
chr3R	17453280	17454110	831	Peak_10283	337.997	0.767157	0.273524	0.0050361	0.0453153
chr3L	11396373	11397328	956	Peak_6675	252.339	0.775497	0.276539	0.00504268	0.0453168
chr3R	803861	804513	653	Peak_8289	216.837	-0.917907	0.327305	0.00504047	0.0453168
chr3R	25083531	25084744	1214	Peak_11100	1010.41	0.685225	0.244386	0.00504932	0.0453477
chr3L	4493616	4494066	451	Peak_5855	197.104	-0.76902	0.27439	0.00506839	0.04549
chr3L	18784102	18784813	712	Peak_7641	357.834	1.07968	0.3853	0.00507582	0.0455268
chrX	19736243	19737444	1202	Peak_13960	861.561	-0.653665	0.233286	0.00507893	0.0455268
chr3L	15692446	15694067	1622	Peak_7215	1667.21	-0.521497	0.186133	0.00508284	0.0455329
chr3R	12333163	12333793	631	Peak_9728	250.141	-0.803573	0.286855	0.00508931	0.0455621
chrX	8670666	8671433	768	Peak_12642	182.574	0.930731	0.332273	0.00509282	0.0455646
chrX	11695832	11696281	450	Peak_12984	126.389	0.986309	0.352152	0.00509756	0.0455782
chrX	14844326	14845437	1112	Peak_13309	868.153	-0.634646	0.226627	0.00510394	0.0456064
chr2L	15908751	15909399	649	Peak_1846	353.492	-0.592374	0.211573	0.00511263	0.0456552
chr2L	18045871	18046423	553	Peak_2002	160.056	-0.920697	0.328981	0.00513196	0.0457989
chrX	7532864	7533112	249	Peak_12507	75.4107	0.954873	0.341362	0.00515411	0.0458071
chr3R	6203662	6204050	389	Peak_8986	165.173	0.647758	0.231486	0.00513788	0.0458071
chr3L	8151857	8152304	448	Peak_6242	174.592	0.784877	0.280545	0.00514707	0.0458071
chrX	170121	170385	265	Peak_11578	125.775	0.823332	0.294264	0.00514301	0.0458071
chr3L	6946935	6947324	390	Peak_6096	83.6753	1.07359	0.383774	0.00515087	0.0458071
chr3L	17399344	17399929	586	Peak_7441	235.585	-0.824311	0.294673	0.00515195	0.0458071
chr2L	7619147	7619824	678	Peak_929	298.705	-0.620376	0.221789	0.00515556	0.0458071
chrX	21839921	21840180	260	Peak_14094	79.0409	1.03217	0.369218	0.00518099	0.0459996
chr2L	18571449	18573195	1747	Peak_2055	1377.93	-0.472414	0.168997	0.00518374	0.0459996
chr3L	22137465	22138058	594	Peak_8080	231.679	0.757588	0.27111	0.00519978	0.0460928
chr3L	6384040	6384537	498	Peak_6036	147.107	-0.99609	0.356468	0.00520076	0.0460928
chr3L	6456378	6457454	1077	Peak_6045	334.54	0.83492	0.29891	0.00521872	0.046223
chrX	15391610	15392351	742	Peak_13357	169.719	0.815916	0.292215	0.00523546	0.0462749
chr3L	17566765	17567388	624	Peak_7475	380.492	0.691558	0.247657	0.00523179	0.0462749
chr3R	3300099	3301078	980	Peak_8624	2431.11	-0.7593	0.271952	0.00523768	0.0462749
chr2R	10600755	10601385	631	Peak_3800	317.97	-0.767461	0.274869	0.00523673	0.0462749
chr2L	6047546	6048982	1437	Peak_721	623.286	0.516763	0.185138	0.00525085	0.0463334
chr3R	881366	882508	1143	Peak_8311	520.429	-0.552251	0.197851	0.0052505	0.0463334
chr3R	26628998	26630293	1296	Peak_11312	721.185	-0.608665	0.218116	0.00526177	0.0464007
chr3R	3933682	3934034	353	Peak_8668	128.823	0.734374	0.263281	0.00528187	0.04652
chr3R	17962343	17962854	512	Peak_10361	195.508	-1.03072	0.369504	0.00527944	0.04652
chr3R	18877003	18877362	360	Peak_10443	101.73	0.937488	0.336137	0.00528706	0.0465251
chr3L	11554012	11554527	516	Peak_6694	253.081	-0.73713	0.26431	0.00528904	0.0465251
chr2L	19314348	19314706	359	Peak_2158	151.109	-0.815631	0.292699	0.00532663	0.0468207
chr2R	12964621	12965035	415	Peak_4094	123.324	-0.896522	0.321746	0.00532926	0.0468207
chr3R	6355909	6357269	1361	Peak_9014	601.597	-0.772875	0.277435	0.00533974	0.0468836
chr3R	21781784	21782186	403	Peak_10793	212.167	-0.69107	0.248115	0.00534808	0.0469277
chr2R	17757857	17758510	654	Peak_4723	357.685	-0.867508	0.311571	0.00536432	0.0469536
chr2L	15312271	15312831	561	Peak_1793	259.542	-0.745469	0.267736	0.00536355	0.0469536
chr3L	17918700	17919217	518	Peak_7521	241.488	-0.878404	0.315448	0.00535902	0.0469536
chr3L	17002990	17003789	800	Peak_7419	1551.6	-0.72012	0.258625	0.00536249	0.0469536
chr3L	3383633	3384791	1159	Peak_5689	1671.37	-0.513985	0.184625	0.00537032	0.046977
chr2L	7526372	7527640	1269	Peak_918	485.881	-0.562709	0.202145	0.00537436	0.0469832
chrX	11039396	11039773	378	Peak_12905	96.0207	1.05094	0.377721	0.00539705	0.0471525
chr3L	8665810	8666186	377	Peak_6307	116.696	0.674189	0.242384	0.00541089	0.0472
chr2R	9117396	9118081	686	Peak_3613	250.632	0.604062	0.217167	0.00540992	0.0472
chr3L	14736296	14736968	673	Peak_7097	786.861	-0.72827	0.261836	0.00541251	0.0472
chr2L	6184733	6185444	712	Peak_738	276.512	-0.683611	0.245826	0.00542127	0.0472473
chr3L	1940091	1940525	435	Peak_5511	199.478	-0.863928	0.310698	0.00542578	0.0472574
chr3L	18174836	18175613	778	Peak_7576	290.436	0.704469	0.253448	0.00544359	0.0473834
chr2R	4982041	4982364	324	Peak_3021	161.508	0.68822	0.247738	0.00546917	0.0474891
chr2L	419399	420786	1388	Peak_65	733.05	0.733818	0.264105	0.00546095	0.0474891
chrX	20925927	20926573	647	Peak_14037	414.497	-0.662436	0.238443	0.00546648	0.0474891
chr3R	24683415	24685417	2003	Peak_11049	3138.53	-0.500291	0.18008	0.00546675	0.0474891
chr3L	1121689	1122294	606	Peak_5388	174.33	-0.745016	0.268226	0.00547682	0.0475263
chr3R	5535941	5536360	420	Peak_8911	151.38	0.678473	0.244321	0.00548667	0.0475825
chr3R	15178712	15179294	583	Peak_10048	355.49	-0.638907	0.230235	0.00551992	0.0478416
chr3L	19176496	19177682	1187	Peak_7709	1270.18	-0.696089	0.250955	0.00554119	0.0479965
chrX	18153432	18153833	402	Peak_13723	102.87	0.943516	0.34019	0.00554567	0.0480059
chr3L	18141793	18142295	503	Peak_7570	252.197	-0.696335	0.25117	0.00556507	0.0481443
chrX	3983070	3983878	809	Peak_12095	295.723	-0.734699	0.265123	0.0055856	0.0482924
chr3L	13016245	13016646	402	Peak_6888	219.324	0.69499	0.250855	0.00559732	0.0483641
chr3L	8780331	8780716	386	Peak_6332	158.158	0.716868	0.258788	0.00560393	0.0483917
chr2R	14113897	14116004	2108	Peak_4231	910.01	0.780647	0.28194	0.00562559	0.0485286
chr3L	3393854	3396066	2213	Peak_5692	1872.11	-0.496173	0.179203	0.00562666	0.0485286
chr2L	6926932	6927440	509	Peak_825	116.471	1.01355	0.366107	0.0056325	0.0485494
chr2L	11038048	11038581	534	Peak_1324	228.236	0.826832	0.298709	0.00563976	0.0485527
chr2L	9894687	9894888	202	Peak_1193	82.9771	0.828797	0.2994	0.0056369	0.0485527
chrX	13787245	13788004	760	Peak_13216	276.008	0.961312	0.347451	0.00566165	0.0486228
chr2L	2181869	2182750	882	Peak_293	360.451	-0.664947	0.240311	0.00565707	0.0486228
chr2R	7719333	7720275	943	Peak_3426	382.155	-0.810597	0.292957	0.00565831	0.0486228
chr3L	18131047	18131499	453	Peak_7568	152.725	-0.795659	0.287577	0.00566146	0.0486228
chr2L	8276975	8277380	406	Peak_1010	224.827	0.721155	0.260689	0.00566885	0.0486551
chr3L	10776042	10776532	491	Peak_6546	138.33	-0.872723	0.315536	0.00567764	0.0487009
chr3R	17478490	17478909	420	Peak_10294	240.23	0.601909	0.217666	0.00568713	0.0487489
chr2L	873766	874530	765	Peak_158	295.269	0.669668	0.242184	0.00569012	0.0487489
chr2R	17262371	17263476	1106	Peak_4645	326.837	0.585924	0.211965	0.00570545	0.0488271
chr3L	832742	833593	852	Peak_5363	320.926	0.619385	0.224079	0.0057073	0.0488271
chr2L	8363813	8364873	1061	Peak_1030	624.714	0.686552	0.24839	0.00570963	0.0488271
chr2R	8064366	8064816	451	Peak_3473	92.4327	0.998001	0.361101	0.00571376	0.048833
chr2L	9906933	9908061	1129	Peak_1198	610.045	0.687454	0.24878	0.00572206	0.0488744
chr3R	4642258	4642577	320	Peak_8769	78.2112	1.08087	0.39124	0.00573279	0.0488889
chr3R	538946	540131	1186	Peak_8244	466.74	0.701412	0.253859	0.00572726	0.0488889
chr3R	22865545	22866186	642	Peak_10913	189.176	-0.956884	0.34637	0.00573414	0.0488889
chr2L	520957	521356	400	Peak_90	149.869	0.789432	0.285786	0.0057393	0.0488901
chr3R	26163763	26164220	458	Peak_11269	187.303	0.750215	0.271619	0.00574465	0.0488901
chr3R	27041282	27042845	1564	Peak_11346	503.104	0.630023	0.228089	0.0057417	0.0488901
chr3L	2588102	2588986	885	Peak_5576	244.273	0.946685	0.342998	0.00577962	0.0491358
chr3L	22381902	22382758	857	Peak_8112	1168.49	-0.524604	0.190075	0.00578047	0.0491358
chr2L	21676581	21680128	3548	Peak_2422	1480.64	0.692657	0.251069	0.00580086	0.0492794
chr3R	11373106	11374134	1029	Peak_9574	374.422	0.942682	0.341735	0.00580642	0.0492971
chr3L	3783962	3784422	461	Peak_5748	138.665	-0.843555	0.305826	0.00581063	0.0493032
chr2R	14664741	14665147	407	Peak_4331	205.346	0.633109	0.22964	0.00583404	0.0494075
chr3R	11629825	11631037	1213	Peak_9597	534.949	0.53569	0.194329	0.0058404	0.0494075
chrX	8039402	8039604	203	Peak_12568	107.046	0.706099	0.256138	0.00583855	0.0494075
chr3R	11471936	11472382	447	Peak_9587	117.671	-0.928464	0.336718	0.00582651	0.0494075
chr2R	19608682	19610513	1832	Peak_4955	1169.35	-0.558985	0.202767	0.0058373	0.0494075
chr3R	6375613	6377711	2099	Peak_9020	899.57	-0.644123	0.233711	0.0058502	0.0494608
chr3L	16587921	16588433	513	Peak_7345	205.737	0.699335	0.253802	0.00586136	0.0495255
chr2L	18457013	18457289	277	Peak_2031	90.1481	-0.997946	0.36228	0.00587592	0.0496189
chr2L	6923850	6924370	521	Peak_821	116.866	0.976168	0.354453	0.00588702	0.0496196
chr2R	19947904	19948885	982	Peak_5016	277.284	0.747526	0.271424	0.00588553	0.0496196
chr3L	12573074	12574027	954	Peak_6829	1449.52	-0.581955	0.211335	0.00589235	0.0496196
chrX	17573361	17573905	545	Peak_13650	311.649	-0.728825	0.264608	0.00588079	0.0496196
chr2R	18043964	18045252	1289	Peak_4745	431.811	-0.766153	0.278232	0.00589355	0.0496196
chr3L	18891868	18893098	1231	Peak_7663	524.562	0.834674	0.303186	0.00590501	0.0496864
chr3L	21217872	21218450	579	Peak_7959	298.498	-0.794336	0.288591	0.00591481	0.0497097
chr2L	16594307	16594887	581	Peak_1909	165.595	-0.836712	0.303965	0.00591132	0.0497097
chr3R	9132792	9133390	599	Peak_9286	270.234	-0.737706	0.268042	0.00591956	0.0497201
chr3L	17042458	17042706	249	Peak_7427	77.1762	0.879692	0.319712	0.00593198	0.0497899
chr2R	18523241	18523604	364	Peak_4808	139.852	0.637758	0.231798	0.00593491	0.0497899
chr3R	13895627	13896606	980	Peak_9872	320.538	-0.58771	0.213705	0.00595767	0.0499512
chr2R	17248109	17248618	510	Peak_4639	208.464	0.725981	0.264123	0.0059843	0.0501011
chr3L	5240840	5242613	1774	Peak_5905	1431.85	-0.465008	0.169184	0.00598619	0.0501011
chr3R	19617318	19617927	610	Peak_10542	272.666	-0.91579	0.333172	0.00598326	0.0501011
chrX	17208225	17208784	560	Peak_13601	530.511	-0.574858	0.209165	0.00598979	0.0501016
chr2L	1433749	1434366	618	Peak_201	258.831	-0.804006	0.292578	0.00599595	0.0501234
chr3L	12516887	12517318	432	Peak_6812	179.198	0.661175	0.24064	0.0060039	0.0501603
chr3L	14241157	14241553	397	Peak_7020	153.063	-0.862183	0.313842	0.00601085	0.0501886
chr2L	5546055	5547423	1369	Peak_682	728.418	-0.451715	0.164448	0.00601692	0.0502097
chr2R	13432494	13433023	530	Peak_4147	213.16	0.6484	0.236153	0.00603858	0.0503607
chrX	1135930	1136912	983	Peak_11701	307.618	0.894713	0.325967	0.00605489	0.0503652
chr2R	8352490	8352752	263	Peak_3512	45.3337	1.0559	0.3847	0.00605608	0.0503652
chr2R	14310172	14311106	935	Peak_4282	522.776	0.633633	0.230797	0.0060435	0.0503652
chr2R	3801076	3801366	291	Peak_2866	120.447	0.816471	0.297474	0.00605694	0.0503652
chr2R	11370916	11371734	819	Peak_3897	656.27	-0.518854	0.189017	0.00605091	0.0503652
chr3L	1329712	1330547	836	Peak_5412	298.223	0.646006	0.235488	0.00608321	0.0505539
chr3L	6351878	6353001	1124	Peak_6024	377.138	-0.649017	0.236691	0.00610587	0.0507124
chr3R	4931443	4931918	476	Peak_8823	106.779	0.833926	0.304187	0.0061161	0.0507219
chr2L	17231236	17231935	700	Peak_1958	289.385	-0.87124	0.317769	0.00611142	0.0507219
chr3L	15208196	15208882	687	Peak_7160	211.322	-0.940913	0.343224	0.00611777	0.0507219
chrX	17316023	17316363	341	Peak_13611	134.272	0.753114	0.274851	0.00614239	0.0508707
chr3R	12295851	12296076	226	Peak_9722	93.3527	0.868771	0.317129	0.00615345	0.0508707
chr3L	15169665	15170216	552	Peak_7146	225.44	-0.742601	0.271049	0.0061489	0.0508707
chr3L	16635491	16635815	325	Peak_7353	101.557	-0.83237	0.303843	0.00615372	0.0508707
chr3L	22832385	22833403	1019	Peak_8157	490.72	-0.641994	0.234338	0.00615115	0.0508707
chrX	10273766	10274297	532	Peak_12817	168.222	0.820719	0.299665	0.00616657	0.0508877
chr2R	16848415	16848882	468	Peak_4585	217.752	0.752404	0.274704	0.00616345	0.0508877
chr3R	17277300	17277929	630	Peak_10250	292.955	-0.618861	0.225953	0.00616461	0.0508877
chr3L	10382686	10383310	625	Peak_6486	165.645	-0.917406	0.33513	0.00619154	0.0510639
chrX	17475515	17476277	763	Peak_13639	358.685	0.928091	0.339123	0.00620518	0.0510703
chr2L	10233942	10234171	230	Peak_1236	39.6064	1.07501	0.392818	0.00620659	0.0510703
chr2L	12365854	12366568	715	Peak_1452	879.134	-0.603821	0.220642	0.00620677	0.0510703
chr3R	22052422	22053085	664	Peak_10840	601.059	-0.631503	0.230736	0.0062019	0.0510703
chrX	7509992	7510519	528	Peak_12501	213.683	-0.903341	0.330128	0.00621267	0.0510892
chr2L	3784239	3784584	346	Peak_478	83.9783	0.994153	0.363652	0.00626071	0.0513052
chr3L	22781197	22781419	223	Peak_8150	95.8271	0.865663	0.316591	0.00625078	0.0513052
chr3L	10547497	10548405	909	Peak_6504	415.897	-0.747215	0.273294	0.00625498	0.0513052
chr2L	2605948	2607202	1255	Peak_341	298.83	-0.814935	0.298079	0.00625792	0.0513052
chr3R	26738001	26738631	631	Peak_11330	864.862	-0.592658	0.216739	0.00624876	0.0513052
chr2L	16620161	16620885	725	Peak_1916	206.808	-0.812217	0.29701	0.00624473	0.0513052
chrX	17002689	17003271	583	Peak_13571	550.013	-0.455941	0.166793	0.00626514	0.0513117
chr2R	8758992	8760431	1440	Peak_3555	615.822	0.666148	0.24381	0.00629045	0.0514594
chr2R	12457992	12458924	933	Peak_4032	270.066	0.756956	0.277041	0.00628957	0.0514594
chrX	71754	72667	914	Peak_11571	761.171	-0.595246	0.217915	0.00630365	0.0515375
chr2R	15912884	15913413	530	Peak_4480	156.625	-0.820451	0.300395	0.00630961	0.0515564
chr2R	10013324	10013586	263	Peak_3722	88.3593	-0.866564	0.317443	0.00633678	0.0517485
chr3R	21833735	21835893	2159	Peak_10800	4738.71	-0.647488	0.237212	0.00634168	0.0517587
chr3L	17596989	17597338	350	Peak_7483	98.8776	1.00897	0.369681	0.00634701	0.0517684
chr3R	4894213	4894637	425	Peak_8822	177.119	0.807093	0.295733	0.0063502	0.0517684
chr3R	12473294	12473950	657	Peak_9745	324.527	0.642839	0.23561	0.00636414	0.0518521
chrX	255455	255859	405	Peak_11589	177.163	0.621715	0.227966	0.00638696	0.0519783
chr3R	17548430	17548808	379	Peak_10308	110.578	-0.908403	0.333087	0.00638698	0.0519783
chrX	13280775	13281929	1155	Peak_13156	540.328	0.5177	0.189949	0.006421	0.0522252
chr3L	2130150	2130496	347	Peak_5522	74.183	0.926345	0.340004	0.00643967	0.0522867
chr3R	13776959	13777491	533	Peak_9862	169.479	-0.74832	0.274641	0.00643553	0.0522867
chr2L	18481761	18482234	474	Peak_2041	158.878	-0.92631	0.339985	0.00643862	0.0522867
chrX	2036375	2036832	458	Peak_11836	144.917	0.887063	0.325623	0.0064457	0.0523056
chrX	10695144	10696472	1329	Peak_12867	588.923	0.516885	0.18979	0.0064604	0.0523948
chr3R	12328227	12329070	844	Peak_9727	439.185	-0.550946	0.202316	0.00646545	0.0524058
chrX	1145907	1146488	582	Peak_11703	323.008	-0.757655	0.278267	0.00647389	0.0524441
chr2L	6424180	6424796	617	Peak_754	234.393	0.508341	0.186754	0.00648903	0.0525066
chr2L	9779512	9780363	852	Peak_1183	472.982	-0.679913	0.249783	0.00648864	0.0525066
chr3R	2902649	2902936	288	Peak_8568	80.7676	0.932063	0.342449	0.00649363	0.0525137
chr2L	646547	648205	1659	Peak_121	589.774	0.690194	0.253627	0.00650272	0.0525571
chr3L	8594763	8595102	340	Peak_6293	106.191	0.967634	0.355734	0.00652602	0.0527153
chrX	17190736	17195407	4672	Peak_13596	2192.72	-0.525284	0.193161	0.00653997	0.0527979
chr3L	18212231	18212575	345	Peak_7591	93.0234	-0.925425	0.340425	0.00655905	0.0529216
chrX	18896127	18896429	303	Peak_13835	80.3486	0.971776	0.357539	0.00656853	0.0529655
chr2R	1600876	1601451	576	Peak_2560	257.502	-0.650345	0.239292	0.00657198	0.0529655
chr3L	16152886	16153199	314	Peak_7272	147.486	0.75607	0.278354	0.00660332	0.0531433
chr3R	20769879	20771179	1301	Peak_10685	644	0.505908	0.186262	0.00660532	0.0531433
chr2R	9468348	9468727	380	Peak_3660	137.703	0.626407	0.230601	0.00659931	0.0531433
chr3R	5703859	5704112	254	Peak_8932	123.065	0.882945	0.325171	0.00662113	0.05322
chr2R	14491703	14492080	378	Peak_4305	110.981	-0.94721	0.34892	0.00663367	0.05322
chr2L	10442416	10442751	336	Peak_1269	125.202	-0.952493	0.350825	0.00662732	0.05322
chr3R	19968332	19970953	2622	Peak_10594	2224.33	-0.714955	0.263347	0.00663001	0.05322
chr2L	21979917	21980646	730	Peak_2470	386.436	-0.693515	0.25543	0.00662568	0.05322
chr3R	2740034	2740730	697	Peak_8534	441.051	-0.577458	0.21275	0.00664245	0.0532601
chr3L	226333	226857	525	Peak_5219	110.119	0.998447	0.36794	0.00665541	0.0533036
chr2L	11291369	11292357	989	Peak_1364	307.49	-0.688287	0.253641	0.00665508	0.0533036
chr3L	5244438	5244856	419	Peak_5906	123.03	0.956228	0.352475	0.00666987	0.0533287
chrX	10677585	10678149	565	Peak_12862	291.961	0.610661	0.225092	0.00666884	0.0533287
chr3L	18391093	18391962	870	Peak_7615	865.945	-0.533302	0.196557	0.00666344	0.0533287
chrX	3271711	3272164	454	Peak_12004	195.292	-0.864807	0.318806	0.00667482	0.0533382
chrX	20101916	20102370	455	Peak_13984	246.724	-0.808604	0.29814	0.00668467	0.0533868
chr2R	11100711	11101474	764	Peak_3865	379.33	0.560783	0.206816	0.00669777	0.0534309
chrX	16217012	16217778	767	Peak_13474	373.341	0.495918	0.182889	0.00669645	0.0534309
chr3L	18094746	18095110	365	Peak_7564	119.228	-0.832575	0.307131	0.00671175	0.0535123
chr2R	6115279	6115957	679	Peak_3183	943.16	-0.505493	0.186486	0.00671582	0.0535146
chr3R	11476264	11477081	818	Peak_9589	397.176	-0.726767	0.268157	0.00672367	0.0535469
chr3L	10656364	10656700	337	Peak_6514	139.025	0.700452	0.258644	0.00676558	0.0538504
chr3R	1072517	1073111	595	Peak_8341	292.161	-0.714453	0.263955	0.00679507	0.0540546
chrX	11404159	11404781	623	Peak_12937	246.771	0.890434	0.329051	0.00680856	0.0541023
chr3R	5626378	5627036	659	Peak_8926	278.364	0.658726	0.243427	0.00680871	0.0541023
chrX	15032501	15033945	1445	Peak_13333	795.778	0.587718	0.217211	0.00681512	0.0541228
chr2R	5452322	5453700	1379	Peak_3087	1434.18	0.637139	0.235504	0.00682162	0.054144
chr3R	25998746	25999328	583	Peak_11230	224.034	0.738954	0.273239	0.0068424	0.0542784
chr3R	26888039	26888948	910	Peak_11336	429.643	-0.592742	0.219213	0.00685194	0.0543236
chrX	16144879	16145211	333	Peak_13460	113.932	0.879221	0.325204	0.00685931	0.0543515
chr3R	18362299	18362812	514	Peak_10408	251.572	0.695145	0.257138	0.00686346	0.054354
chr3L	16576148	16576464	317	Peak_7341	115.982	0.751182	0.277962	0.00688283	0.0544769
chr3L	21480122	21480465	344	Peak_7987	111.472	0.914862	0.338608	0.00689586	0.0545189
chr2L	13978005	13978430	426	Peak_1634	138.147	0.933797	0.345612	0.00689517	0.0545189
chrX	18186161	18186860	700	Peak_13734	298.568	-0.696069	0.257728	0.0069175	0.0546595
chr3R	3955127	3955391	265	Peak_8675	126.016	0.741031	0.2744	0.00692256	0.0546689
chr3R	17683058	17683940	883	Peak_10327	373.897	0.724023	0.268165	0.00693565	0.0547416
chr3L	21795373	21795586	214	Peak_8042	77.0118	0.863902	0.320038	0.00694703	0.0548009
chr3L	18227212	18228248	1037	Peak_7599	1772.61	-0.463234	0.171672	0.00696807	0.0549056
chr2L	3552032	3553100	1069	Peak_440	391.089	-0.778812	0.28861	0.00696554	0.0549056
chr2L	18467311	18467896	586	Peak_2036	367.535	-0.711851	0.263864	0.00698016	0.0549702
chr2R	8553283	8553608	326	Peak_3536	168.905	0.655803	0.243141	0.00699227	0.0550043
chr2L	21680702	21682233	1532	Peak_2423	599.835	0.674398	0.25002	0.00698886	0.0550043
chrX	2260255	2260946	692	Peak_11880	315.391	-0.726328	0.269367	0.00700887	0.0551042
chrX	8462942	8463514	573	Peak_12615	439.492	0.661943	0.245598	0.00703404	0.0552143
chr3L	8870519	8871590	1072	Peak_6344	438.692	-0.81871	0.303726	0.00702715	0.0552143
chr2R	6560566	6561227	662	Peak_3239	840.809	-0.614221	0.227894	0.00703459	0.0552143
chrX	16061609	16062331	723	Peak_13452	257.523	0.825595	0.306453	0.00705935	0.0553472
chr2R	4558556	4559564	1009	Peak_2967	506.218	-0.665953	0.247188	0.00705751	0.0553472
chr2L	8488294	8488494	201	Peak_1056	51.8947	1.05772	0.39271	0.00707282	0.055422
chr2R	5324872	5325353	482	Peak_3072	163.935	0.68981	0.256184	0.00708891	0.0554866
chr3L	4351831	4352290	460	Peak_5835	181.312	-0.906293	0.336562	0.00708555	0.0554866
chr3L	260936	261268	333	Peak_5225	68.2789	0.996853	0.3703	0.00710215	0.0555359
chr3R	21842549	21845122	2574	Peak_10803	2999.59	-0.455781	0.169311	0.00710307	0.0555359
chrX	9047400	9048171	772	Peak_12697	127.266	0.996933	0.370476	0.00712478	0.0556368
chrX	11658583	11659011	429	Peak_12976	107.628	0.968477	0.359943	0.00713161	0.0556368
chr2R	19882422	19882833	412	Peak_5003	207.287	0.599117	0.222679	0.00713451	0.0556368
chr2L	6490401	6490830	430	Peak_766	149.697	0.65039	0.241757	0.00713958	0.0556368
chrX	2349463	2350601	1139	Peak_11888	1093.37	-0.464599	0.172692	0.00713817	0.0556368
chr2L	20486013	20487023	1011	Peak_2284	467.648	-0.782101	0.290624	0.00712154	0.0556368
chr2R	12618640	12619277	638	Peak_4057	699.369	-0.454608	0.169008	0.00714814	0.055646
chr3R	18011019	18012306	1288	Peak_10376	446.372	-0.606908	0.22563	0.00714864	0.055646
chrX	1023773	1024369	597	Peak_11685	179.355	-0.863475	0.321142	0.00717166	0.0557945
chrX	1994356	1994750	395	Peak_11826	95.1204	0.917089	0.341236	0.00719782	0.0558537
chr3L	3239378	3240544	1167	Peak_5659	781.118	0.467141	0.173817	0.00719788	0.0558537
chr3L	5080311	5080853	543	Peak_5892	147.821	-0.896945	0.333723	0.00719469	0.0558537
chr3R	12759727	12760774	1048	Peak_9773	1687.31	-0.581952	0.216556	0.00720298	0.0558537
chrX	2870396	2871239	844	Peak_11948	175.412	-0.89021	0.33125	0.00720053	0.0558537
chr3R	5076319	5076834	516	Peak_8841	191.589	-0.834653	0.310515	0.00718898	0.0558537
chr3R	26211357	26211872	516	Peak_11275	99.6812	0.926172	0.344734	0.00721768	0.0558757
chr3R	4302948	4303717	770	Peak_8733	997.171	-0.606014	0.225553	0.00721411	0.0558757
chr2R	3081343	3081989	647	Peak_2755	214.307	-0.760162	0.282935	0.00721622	0.0558757
chr2R	19101116	19101642	527	Peak_4889	150.455	0.871523	0.324604	0.00725552	0.0560798
chr3L	15222942	15224719	1778	Peak_7166	871.202	0.704211	0.262289	0.00725594	0.0560798
chr3L	535092	535630	539	Peak_5275	195.816	-0.809694	0.301569	0.00725426	0.0560798
chr2R	14175023	14175248	226	Peak_4252	75.2199	0.854599	0.3184	0.00727371	0.0561615
chr3R	26551206	26551644	439	Peak_11298	100.641	-0.856455	0.319117	0.00727843	0.0561615
chr3R	3789011	3789699	689	Peak_8646	863.412	-0.64172	0.239097	0.00727628	0.0561615
chrX	14964294	14965557	1264	Peak_13322	1079.78	-0.500794	0.186615	0.00728414	0.0561749
chrX	7424037	7425274	1238	Peak_12487	262.718	-0.815787	0.304049	0.00729482	0.0562266
chr2L	9709196	9709526	331	Peak_1174	66.1604	0.98711	0.368043	0.0073172	0.056307
chr3L	1898160	1898625	466	Peak_5503	135.083	-0.875452	0.326381	0.00731179	0.056307
chr3R	19144582	19145028	447	Peak_10483	117.471	-0.853967	0.318381	0.00731361	0.056307
chr3R	12257324	12258309	986	Peak_9715	470.254	0.504374	0.188073	0.00732288	0.05632
chrX	11526707	11527542	836	Peak_12961	691.215	0.807965	0.30136	0.00733891	0.0563656
chr2R	13556141	13556469	329	Peak_4161	73.4559	0.905841	0.337844	0.00733505	0.0563656
chr2R	13556699	13557284	586	Peak_4162	247.776	0.644384	0.240354	0.00734076	0.0563656
chrX	16344083	16344327	245	Peak_13491	50.3502	1.04791	0.390957	0.00735387	0.0563744
chr2R	4980241	4980742	502	Peak_3020	277.214	0.625543	0.233369	0.00735151	0.0563744
chr3L	3612786	3613291	506	Peak_5724	358.801	-0.559743	0.208816	0.00734989	0.0563744
chr2R	18284738	18285621	884	Peak_4783	856.922	-0.588092	0.219469	0.00737067	0.0564726
chr3L	18214181	18214953	773	Peak_7592	784.603	-0.674985	0.251963	0.00738619	0.0565608
chrX	20939207	20939891	685	Peak_14041	475.693	-0.571631	0.213407	0.00739322	0.056584
chr2L	16355019	16355333	315	Peak_1875	64.4762	0.999657	0.373264	0.00740298	0.056628
chr3L	12548867	12549419	553	Peak_6823	177.782	0.703743	0.262807	0.00741089	0.0566403
chr3L	12620633	12621461	829	Peak_6840	630.791	-0.688295	0.257046	0.0074126	0.0566403
chr2R	14285495	14286269	775	Peak_4275	249.609	0.595773	0.222611	0.00744406	0.0568499
chr3L	10759525	10760314	790	Peak_6542	379.825	-0.585402	0.218796	0.00746039	0.0568825
chr3L	4746939	4747529	591	Peak_5884	260.301	-0.76185	0.284736	0.00745866	0.0568825
chr3R	15137882	15138514	633	Peak_10036	573.558	-0.528114	0.197382	0.00745967	0.0568825
chr3L	14610838	14611192	355	Peak_7081	105.947	0.9623	0.359768	0.00747787	0.056985
chr3R	853279	854718	1440	Peak_8303	728.281	-0.510848	0.191103	0.00751413	0.0572305
chr2L	19143658	19144612	955	Peak_2139	878.247	0.647229	0.242173	0.00752686	0.0572383
chr2L	10059039	10059448	410	Peak_1226	89.0476	0.85891	0.32138	0.0075273	0.0572383
chr3L	18759570	18759880	311	Peak_7635	102.115	1.01481	0.379667	0.00751973	0.0572383
chrX	14733722	14734590	869	Peak_13294	464.063	0.670976	0.251135	0.00754513	0.057261
chr2L	512572	513338	767	Peak_87	289.334	0.728485	0.272643	0.00754151	0.057261
chrX	7067964	7069441	1478	Peak_12451	312.38	-0.799506	0.299237	0.00754419	0.057261
chrX	18445634	18447153	1520	Peak_13763	1065.91	-0.390578	0.14619	0.0075465	0.057261
chr2L	1422538	1423027	490	Peak_196	169.596	-0.826934	0.309577	0.0075587	0.0572921
chrX	22227038	22228040	1003	Peak_14127	282.219	-0.721798	0.270201	0.00755499	0.0572921
chr3R	27136091	27137763	1673	Peak_11358	1613.19	-0.417255	0.156225	0.00756564	0.057314
chr4	1299132	1299489	358	Peak_11568	159.271	0.743571	0.278467	0.00757981	0.0573699
chr3L	20603040	20603876	837	Peak_7866	391.723	0.737935	0.276362	0.00758113	0.0573699
chr3L	21948027	21948411	385	Peak_8065	172.859	0.747007	0.279813	0.00759277	0.057412
chr3R	11118619	11120150	1532	Peak_9543	745.166	0.542593	0.203251	0.00759483	0.057412
chr2L	19546754	19547537	784	Peak_2198	290.854	0.486763	0.182373	0.00760666	0.0574708
chr3L	13036689	13037069	381	Peak_6896	115.358	0.939327	0.351977	0.00761425	0.0574974
chr3R	16372464	16372847	384	Peak_10126	163.043	0.904958	0.339178	0.00762839	0.057505
chr3R	20881742	20882921	1180	Peak_10702	541.09	0.54799	0.20537	0.0076233	0.057505
chr2L	14020551	14021166	616	Peak_1637	469.583	-0.539509	0.202207	0.00762802	0.057505
chr3R	12359559	12360057	499	Peak_9736	151.437	-0.717079	0.268775	0.00763154	0.057505
chr3L	3782687	3783389	703	Peak_5747	578.093	-0.492939	0.184885	0.00767168	0.0577767
chr3L	17405148	17405705	558	Peak_7442	181.913	-0.778367	0.29196	0.00767592	0.0577778
chr3L	4446258	4446495	238	Peak_5852	82.2571	0.924788	0.34697	0.00769131	0.0578629
chr2L	6966340	6967812	1473	Peak_833	761.618	0.577923	0.216876	0.00770424	0.0579163
chr2R	19727249	19728047	799	Peak_4969	1349.07	-0.67389	0.252899	0.0077066	0.0579163
chr2L	21312882	21313567	686	Peak_2403	606.501	-0.571071	0.21433	0.00771147	0.057922
chr3R	4387536	4387851	316	Peak_8735	131.634	0.819086	0.307471	0.00772304	0.0579782
chr3L	18388696	18389034	339	Peak_7614	73.4619	1.03073	0.387033	0.00774122	0.0579915
chr3L	783011	783300	290	Peak_5346	86.1812	0.758279	0.284688	0.00773221	0.0579915
chr3R	1826198	1826596	399	Peak_8429	119.834	0.975563	0.366311	0.00774	0.0579915
chr3L	9422140	9422368	229	Peak_6404	67.9323	0.92314	0.34659	0.0077334	0.0579915
chr3R	10261030	10261574	545	Peak_9445	175.801	-0.914689	0.3436	0.00776612	0.0581164
chr2L	19360626	19362439	1814	Peak_2168	1395.95	-0.61412	0.230692	0.00776596	0.0581164
chr2L	1725498	1726115	618	Peak_248	115.021	0.965162	0.362659	0.00778285	0.0582108
chr2R	13023655	13024232	578	Peak_4105	198.298	0.773917	0.29086	0.00779586	0.0582464
chr3R	3134971	3135892	922	Peak_8602	801.952	-0.543394	0.20421	0.00779202	0.0582464
chr3R	2765625	2766220	596	Peak_8541	272.719	-0.754675	0.283671	0.00780504	0.0582842
chr3L	5177221	5178523	1303	Peak_5904	1323.51	-0.506032	0.190251	0.00781848	0.0583128
chr2L	14634670	14635063	394	Peak_1744	109.175	-0.782416	0.294176	0.00782125	0.0583128
chr3R	4293773	4296395	2623	Peak_8730	1228.69	-0.437372	0.164433	0.00781694	0.0583128
chr3L	16879339	16879808	470	Peak_7396	166.812	-0.816952	0.307199	0.00782902	0.05834
chr3R	27423811	27424078	268	Peak_11395	52.8895	1.0442	0.392719	0.0078398	0.0583896
chr2L	249043	249623	581	Peak_43	663.973	0.566963	0.213305	0.0078608	0.0585152
chrX	14846090	14847818	1729	Peak_13310	1253.38	-0.522095	0.196458	0.00787139	0.0585632
chr3R	20143927	20144230	304	Peak_10623	131.641	0.808405	0.304242	0.0078814	0.0586068
chr2R	17573428	17573671	244	Peak_4696	50.5154	0.975079	0.367124	0.00790743	0.0587694
chr3R	19184287	19185625	1339	Peak_10493	465.43	0.754688	0.284215	0.00792274	0.0588523
chr2R	16915142	16915713	572	Peak_4595	171.065	-0.685638	0.258232	0.00792805	0.0588608
chr2L	4576499	4577062	564	Peak_550	212.055	0.835404	0.314663	0.00793274	0.0588647
chr3R	9823185	9823873	689	Peak_9379	227.019	0.852782	0.32135	0.00796038	0.058946
chr3R	19120835	19121574	740	Peak_10477	1087.57	-0.496474	0.187076	0.00795753	0.058946
chr2L	7356612	7357250	639	Peak_895	253.281	-0.717747	0.270445	0.00795569	0.058946
chr3L	22515304	22516411	1108	Peak_8134	265.885	-0.783432	0.295194	0.00795535	0.058946
chr3L	12094743	12095272	530	Peak_6759	277.498	0.712521	0.268667	0.00800016	0.0591786
chr3L	16580481	16580830	350	Peak_7343	138.273	0.700502	0.264118	0.00799609	0.0591786
chrX	19053672	19054096	425	Peak_13846	131.624	-0.814527	0.307206	0.00801581	0.0592633
chr3L	10220040	10220843	804	Peak_6465	240.484	0.86917	0.327866	0.00802557	0.0592735
chr2R	20870122	20871351	1230	Peak_5153	1546.96	-0.590553	0.222759	0.00802329	0.0592735
chr2L	7324784	7325243	460	Peak_887	105.988	0.965499	0.364243	0.00803249	0.0592936
chr3L	12109011	12109535	525	Peak_6765	187.3	0.583615	0.220189	0.00803695	0.0592955
chr2R	3578910	3579355	446	Peak_2835	213.335	-0.64792	0.244495	0.00804829	0.0593483
chr3L	19683175	19683908	734	Peak_7755	118.734	1.00423	0.379006	0.00805778	0.0593872
chr2L	7872194	7873085	892	Peak_952	420.518	0.551651	0.208267	0.00807871	0.0595105
chrX	22035548	22036283	736	Peak_14121	1092.84	-0.632548	0.238851	0.00808981	0.0595612
chr2R	16060897	16061816	920	Peak_4510	255.797	-0.785351	0.296597	0.00809988	0.0596043
chr2L	4846727	4847508	782	Peak_579	409.428	0.553635	0.209162	0.00812279	0.0597372
chr2L	12822269	12823181	913	Peak_1516	1096.12	-0.463808	0.175235	0.00812639	0.0597372
chr2L	20940459	20940792	334	Peak_2337	126.971	-0.801276	0.302783	0.00813601	0.0597768
chr3L	10911409	10911942	534	Peak_6573	155.713	-0.803409	0.303665	0.00815199	0.0598631
chr2R	11362284	11362734	451	Peak_3893	106.861	0.861809	0.325776	0.00815944	0.0598748
chrX	20780926	20781881	956	Peak_14022	296.771	-0.600384	0.226963	0.00816205	0.0598748
chr3R	2817273	2819148	1876	Peak_8554	1051.33	0.649333	0.245488	0.00816744	0.0598832
chr2R	1989872	1990469	598	Peak_2600	326.723	-0.661865	0.250292	0.00818436	0.0599762
chr2L	4056985	4057363	379	Peak_506	111.514	-0.882889	0.333963	0.00820123	0.0600376
chr2L	21993108	21994087	980	Peak_2471	449.802	-0.625929	0.236762	0.00820031	0.0600376
chr2R	16833604	16833892	289	Peak_4584	45.1951	1.034	0.391248	0.00822203	0.0601587
chr3R	8198307	8199062	756	Peak_9214	397.456	0.674447	0.255253	0.0082352	0.0602005
chr3R	12222071	12222547	477	Peak_9706	174.727	0.712692	0.269807	0.00825438	0.0602005
chrX	20885476	20886216	741	Peak_14026	239.535	0.718603	0.272113	0.00827032	0.0602005
chr3L	15975564	15976450	887	Peak_7239	321.361	0.609983	0.230961	0.0082647	0.0602005
chrX	5418220	5418954	735	Peak_12237	1112.36	-0.597812	0.226364	0.00826794	0.0602005
chrX	20359306	20360357	1052	Peak_14004	508.982	-0.521427	0.197381	0.00824833	0.0602005
chr3R	25701829	25703127	1299	Peak_11198	1407.5	-0.418497	0.158399	0.00824084	0.0602005
chr3L	11368505	11368985	481	Peak_6668	122.594	-0.916002	0.346749	0.00824952	0.0602005
chr3L	13206333	13206778	446	Peak_6925	120.325	-0.789508	0.298903	0.00825756	0.0602005
chr2R	6951349	6952121	773	Peak_3282	474.28	-0.603213	0.228388	0.00826186	0.0602005
chr3R	19880967	19881832	866	Peak_10585	171.282	0.890838	0.337379	0.00827912	0.0602025
chr2L	11042634	11043043	410	Peak_1325	143.552	-0.642774	0.243422	0.00827659	0.0602025
chr3L	530412	531894	1483	Peak_5274	546.714	-0.609776	0.230953	0.00828438	0.0602098
chr2L	8426897	8427594	698	Peak_1043	110.259	0.995435	0.377156	0.00830734	0.0602836
chr3R	1390284	1391364	1081	Peak_8385	358.101	0.524581	0.198741	0.00830226	0.0602836
chr2R	18938956	18939926	971	Peak_4872	316.307	-0.736379	0.278988	0.00830361	0.0602836
chr3R	15106802	15109926	3125	Peak_10024	1847.45	-0.428213	0.16226	0.00831385	0.0603
chr2L	5539552	5540248	697	Peak_679	133.253	0.916093	0.347166	0.00832065	0.0603128
chr2L	1069279	1069753	475	Peak_167	130.844	-0.969521	0.367433	0.00832416	0.0603128
chr2R	6079794	6080145	352	Peak_3175	110.143	0.732045	0.277539	0.00834882	0.0603791
chr2L	10766273	10766473	201	Peak_1295	36.9581	1.0326	0.391522	0.00835467	0.0603791
chr2R	8757522	8758876	1355	Peak_3554	522.792	0.666037	0.252513	0.00834863	0.0603791
chr3L	22862809	22863179	371	Peak_8164	77.7098	0.957501	0.362963	0.00833939	0.0603791
chr2L	3805472	3806051	580	Peak_483	223.284	-0.717145	0.271904	0.00835212	0.0603791
chr2L	14568654	14569254	601	Peak_1727	231.394	-0.687475	0.260698	0.00836299	0.0604084
chr3R	9876388	9876808	421	Peak_9393	166.751	0.691688	0.262332	0.00837191	0.0604419
chr2R	4222303	4222710	408	Peak_2925	153.093	0.763824	0.289827	0.00840258	0.0605738
chr2R	17989849	17990887	1039	Peak_4736	346.313	0.54141	0.205435	0.00840303	0.0605738
chr2R	18917145	18917609	465	Peak_4864	150.767	-0.910289	0.345386	0.00839965	0.0605738
chr3L	15001939	15002348	410	Peak_7122	140.517	-0.853206	0.323815	0.00841738	0.0606463
chr2R	4998161	4998990	830	Peak_3027	376.79	0.639143	0.242592	0.00842247	0.060652
chr3R	9230323	9231517	1195	Peak_9300	350.369	0.673757	0.255796	0.00843963	0.0607197
chr2L	20831076	20831427	352	Peak_2320	125.173	0.85514	0.324664	0.00844045	0.0607197
chr2L	19157832	19159220	1389	Peak_2143	2056.22	-0.507809	0.192814	0.00844661	0.0607331
chr3R	7049629	7050739	1111	Peak_9094	324.19	0.743935	0.282493	0.00845188	0.0607401
chr2L	17267320	17267723	404	Peak_1966	166.238	-0.711507	0.2702	0.00845695	0.0607456
chr3L	16471854	16472121	268	Peak_7328	89.817	0.958097	0.363887	0.00846459	0.0607697
chr3R	3049567	3050213	647	Peak_8594	849.896	-0.45733	0.173738	0.00848084	0.0608554
chr3L	17475905	17476386	482	Peak_7455	264.834	1.02327	0.388938	0.00851527	0.0610715
chr3L	16398449	16398718	270	Peak_7320	58.767	0.987384	0.375376	0.00852887	0.061138
chr3L	20625094	20625583	490	Peak_7870	166.629	0.91347	0.347428	0.00855761	0.0611633
chr2L	6695357	6695774	418	Peak_799	128.837	0.696332	0.264862	0.00856269	0.0611633
chr3L	507716	508176	461	Peak_5268	123.998	0.909578	0.345871	0.00854313	0.0611633
chr3R	4023796	4024306	511	Peak_8693	208.028	0.89812	0.341586	0.00855709	0.0611633
chr2L	20290726	20291189	464	Peak_2267	195.017	-0.64835	0.246597	0.00855892	0.0611633
chr2R	2229157	2229532	376	Peak_2642	130.071	-0.817865	0.311051	0.00855467	0.0611633
chr2L	20481115	20481474	360	Peak_2282	120.265	-0.870197	0.330929	0.00854956	0.0611633
chrX	19492557	19493070	514	Peak_13912	126.532	1.00039	0.380656	0.00858726	0.0612711
chr2L	17755549	17756092	544	Peak_1991	153.447	-0.815829	0.310432	0.00858779	0.0612711
chrX	12788136	12788756	621	Peak_13090	454.878	-0.598436	0.227722	0.00859078	0.0612711
chr3R	24672578	24673647	1070	Peak_11043	307.495	-0.655114	0.249316	0.00859794	0.0612912
chr3L	9708903	9709356	454	Peak_6438	89.4909	0.967	0.368063	0.00860734	0.0613273
chr3L	799678	800653	976	Peak_5348	408.497	-0.709678	0.270152	0.00861518	0.0613522
chrX	10707282	10707482	201	Peak_12874	69.2622	1.00973	0.38448	0.0086341	0.061456
chr2L	18702781	18703636	856	Peak_2076	399.292	0.645735	0.245933	0.00864835	0.0615208
chr2L	6065532	6066415	884	Peak_724	340.524	0.492077	0.187421	0.00865191	0.0615208
chr2R	20882015	20882394	380	Peak_5157	77.3017	1.02676	0.391215	0.00867661	0.0615476
chr3R	24679589	24680048	460	Peak_11046	100.767	1.00398	0.382501	0.00867076	0.0615476
chr2R	4985769	4986298	530	Peak_3024	278.944	0.582536	0.221939	0.00867115	0.0615476
chr3L	9521829	9522453	625	Peak_6422	504.48	-0.501549	0.191115	0.00868179	0.0615476
chr2L	1972569	1973275	707	Peak_269	1140.9	-0.542677	0.20673	0.00866351	0.0615476
chr2L	6200646	6201259	614	Peak_743	210.819	-0.736764	0.280737	0.00868047	0.0615476
chrX	18399072	18399730	659	Peak_13755	715.343	-0.52125	0.198642	0.00868876	0.061566
chrX	8658449	8658969	521	Peak_12641	180.575	0.743663	0.283478	0.00870689	0.0616019
chr3L	225803	226131	329	Peak_5218	125.878	0.87617	0.333983	0.0087057	0.0616019
chr2R	7902483	7904083	1601	Peak_3452	1795.06	-0.487877	0.185952	0.00869867	0.0616019
[truncated: 727 more rows]

## Sheet: Damaged EL3 vs LL3
Peak Attributes						Young Damaged vs. Old Damaged
Chr	Start	End	Width	Peak ID	BaseMean	log2 Fold Change	Standard Error	P Value	Adjusted P Value
chr3L	16168171	16169502	1332	Peak_7278	938.545	-1.85809	0.184311	6.68268e-24	9.44664e-20
chr3L	16166916	16167939	1024	Peak_7277	821.756	-2.13094	0.234143	8.94953e-20	6.32552e-16
chr3L	5120834	5121529	696	Peak_5893	344.075	-2.3909	0.267926	4.50793e-19	2.12414e-15
chr2L	14642216	14642755	540	Peak_1746	417.002	-2.20742	0.250483	1.2222e-18	4.31925e-15
chr3R	16494742	16495309	568	Peak_10151	328.62	-2.03181	0.235322	5.91679e-18	1.6728e-14
chr2R	15826513	15827831	1319	Peak_4464	995.04	-1.6739	0.201454	9.64213e-17	2.27168e-13
chr3L	17957714	17959012	1299	Peak_7528	1395.67	-2.38029	0.294835	6.84209e-16	1.38171e-12
chr2L	14651677	14652412	736	Peak_1747	627.288	-2.13148	0.266144	1.15886e-15	2.04771e-12
chr3L	10379643	10380919	1277	Peak_6485	640.698	-1.82436	0.229245	1.74661e-15	2.74335e-12
chr3R	26087116	26089431	2316	Peak_11250	1782.39	-1.48709	0.187735	2.35206e-15	3.32488e-12
chr3R	19773945	19775414	1470	Peak_10570	1219.08	-1.25812	0.162139	8.52575e-15	1.09564e-11
chrX	17444192	17445597	1406	Peak_13632	870.637	-1.22723	0.159405	1.37351e-14	1.618e-11
chr3R	26668325	26669634	1310	Peak_11323	1074.4	-1.54264	0.20338	3.32462e-14	3.61514e-11
chr2L	16597687	16598647	961	Peak_1910	545.105	-1.89587	0.250957	4.20334e-14	4.24417e-11
chr3R	19321636	19323000	1365	Peak_10508	872.752	-1.75059	0.233187	6.03963e-14	5.69175e-11
chr3R	16605560	16606585	1026	Peak_10160	1110.2	-1.93932	0.260023	8.76763e-14	7.7462e-11
chr2R	13698603	13699439	837	Peak_4182	432.085	-1.86088	0.25087	1.19162e-13	9.80661e-11
chr2R	16077085	16078266	1182	Peak_4515	461.17	-2.15674	0.290999	1.24872e-13	9.80661e-11
chr3L	1268979	1269516	538	Peak_5403	265.236	-1.62468	0.22751	9.25744e-13	6.88754e-10
chr3R	22901126	22901917	792	Peak_10917	411.286	-2.00945	0.282475	1.12942e-12	7.98274e-10
chr3L	15258061	15258559	499	Peak_7175	332.247	-1.85528	0.262423	1.55153e-12	1.0444e-09
chr2L	21017640	21018873	1234	Peak_2354	1294.05	-1.30507	0.185939	2.23738e-12	1.43762e-09
chr2R	8664182	8665265	1084	Peak_3548	1147.23	-1.16217	0.166348	2.82051e-12	1.73351e-09
chr2R	14558864	14560215	1352	Peak_4322	678.406	-1.27052	0.183138	3.99093e-12	2.35066e-09
chr2L	16842522	16843282	761	Peak_1943	292.169	-1.74417	0.255255	8.31256e-12	4.70025e-09
chr3L	8149563	8150351	789	Peak_6241	404.159	-1.50021	0.21977	8.7145e-12	4.73801e-09
chr3L	16034201	16035162	962	Peak_7253	702.057	-1.90785	0.285635	2.40014e-11	1.25661e-08
chr3L	14603891	14604475	585	Peak_7077	284.841	-1.4493	0.218609	3.36471e-11	1.6987e-08
chrX	1467967	1469486	1520	Peak_11749	1944.29	-1.44066	0.217792	3.71974e-11	1.76963e-08
chr2R	15504460	15504981	522	Peak_4423	219.799	-1.99616	0.301834	3.75558e-11	1.76963e-08
chr2L	13043881	13044589	709	Peak_1531	662.032	-2.04424	0.30969	4.08593e-11	1.86318e-08
chr3R	9350249	9353046	2798	Peak_9309	1128.85	-1.28561	0.195451	4.77815e-11	2.11075e-08
chr2R	7462957	7463550	594	Peak_3372	437.697	-1.42194	0.216651	5.26279e-11	2.25439e-08
chr3R	22657818	22658890	1073	Peak_10879	610.816	-1.15713	0.176798	5.95312e-11	2.4093e-08
chr2R	5561840	5563435	1596	Peak_3097	794.177	-1.21968	0.186364	5.9653e-11	2.4093e-08
chr3R	12348945	12349928	984	Peak_9734	380.23	-1.61064	0.248797	9.56409e-11	3.7555e-08
chr3L	10896910	10897514	605	Peak_6569	265.612	-1.69759	0.264166	1.30821e-10	4.99808e-08
chr2R	16959488	16961450	1963	Peak_4606	736.813	1.02938	0.160455	1.40455e-10	5.22494e-08
chr2R	15259856	15261022	1167	Peak_4401	1049.36	-1.32183	0.20667	1.59653e-10	5.51553e-08
chr3R	17731004	17732057	1054	Peak_10337	428.416	-1.32464	0.207061	1.58118e-10	5.51553e-08
chr2L	21878895	21880279	1385	Peak_2459	1295.99	-1.61791	0.252974	1.59972e-10	5.51553e-08
chr3L	17559529	17560456	928	Peak_7473	519.96	-1.44906	0.226948	1.71409e-10	5.63495e-08
chr2R	3082324	3083051	728	Peak_2756	600.311	-1.7552	0.274791	1.68748e-10	5.63495e-08
chrX	2878674	2879754	1081	Peak_11951	832.076	-1.33358	0.209087	1.79296e-10	5.7603e-08
chr2R	4081905	4083764	1860	Peak_2907	1544.82	-1.50829	0.237834	2.27114e-10	7.13441e-08
chr3R	14976699	14977456	758	Peak_10002	377.586	-1.38926	0.221183	3.36276e-10	1.03339e-07
chr2L	18455356	18456377	1022	Peak_2030	389.764	-1.74086	0.277884	3.73515e-10	1.12341e-07
chr3L	14971430	14972061	632	Peak_7115	932.771	-1.13686	0.18196	4.16175e-10	1.22564e-07
chrX	14375070	14376423	1354	Peak_13265	1532.72	-1.21274	0.194908	4.9058e-10	1.41527e-07
chr2L	18463660	18464594	935	Peak_2033	854.287	-1.29783	0.208725	5.03939e-10	1.42474e-07
chr2R	15307690	15308703	1014	Peak_4404	518.492	-1.39469	0.22506	5.7565e-10	1.59557e-07
chr3L	10844343	10845066	724	Peak_6559	717.572	-1.55584	0.251442	6.1062e-10	1.65995e-07
chr2R	13720929	13722015	1087	Peak_4189	978.989	-1.4049	0.228256	7.51043e-10	2.00316e-07
chr2R	15534464	15535360	897	Peak_4429	640.675	-1.00454	0.163456	7.96573e-10	2.08525e-07
chr2R	2973411	2974518	1108	Peak_2737	1258.18	-1.11642	0.181804	8.21151e-10	2.11051e-07
chr3R	16420297	16420821	525	Peak_10144	373.554	-1.3881	0.226567	8.97336e-10	2.26513e-07
chr2R	20478359	20479792	1434	Peak_5092	898.794	-1.60564	0.262521	9.58097e-10	2.37608e-07
chr3L	5546672	5547285	614	Peak_5918	407.861	-1.60296	0.263252	1.13573e-09	2.76806e-07
chr3L	1391709	1392690	982	Peak_5427	386.04	-1.33636	0.220304	1.31157e-09	3.14244e-07
chr2L	12065338	12066263	926	Peak_1435	273.511	-1.36147	0.225215	1.49194e-09	3.51501e-07
chr2L	12013186	12014389	1204	Peak_1428	2075.81	-1.68828	0.27975	1.58992e-09	3.68445e-07
chrX	16800011	16800441	431	Peak_13554	152.802	-1.71074	0.283772	1.65412e-09	3.7714e-07
chr3L	17495313	17496072	760	Peak_7465	637.103	-1.3528	0.22502	1.83359e-09	4.11424e-07
chr2L	1399352	1400023	672	Peak_190	328.546	-1.50493	0.25052	1.88744e-09	4.16888e-07
chr2R	7403059	7404455	1397	Peak_3358	738.458	-1.48127	0.246806	1.95187e-09	4.24486e-07
chr3L	660005	661433	1429	Peak_5305	794.473	-1.72834	0.289179	2.27652e-09	4.87589e-07
chr2L	632646	635510	2865	Peak_118	2050.51	-0.874987	0.146793	2.51194e-09	5.29983e-07
chr3L	3536684	3537413	730	Peak_5716	769.179	-1.51574	0.255633	3.041e-09	6.23025e-07
chr3L	1592763	1593483	721	Peak_5459	373.165	-1.68866	0.284796	3.04108e-09	6.23025e-07
chr3R	6458941	6460225	1285	Peak_9039	526.531	-1.83152	0.310602	3.70858e-09	7.48921e-07
chrX	1445451	1446405	955	Peak_11744	424.351	-1.65703	0.281186	3.79259e-09	7.551e-07
chrX	1455636	1457368	1733	Peak_11746	1671.5	-1.12392	0.191429	4.32641e-09	8.49418e-07
chr3L	13085887	13087227	1341	Peak_6906	448.472	-1.27741	0.219057	5.4972e-09	1.0645e-06
chrX	1513047	1516832	3786	Peak_11755	2692.1	1.32602	0.228683	6.69074e-09	1.27811e-06
chr2L	4820539	4822656	2118	Peak_576	914.733	-1.52962	0.264229	7.08013e-09	1.33446e-06
chr3L	3512541	3513095	555	Peak_5712	369.952	-1.87849	0.324813	7.3242e-09	1.3623e-06
chr2L	7050486	7051064	579	Peak_847	362.295	-1.26746	0.219384	7.58767e-09	1.39298e-06
chr3L	15259122	15259759	638	Peak_7176	402.562	-1.73499	0.30071	7.94346e-09	1.4396e-06
chr2R	15503166	15504267	1102	Peak_4422	560.025	-1.127	0.196273	9.35708e-09	1.67432e-06
chrX	4949113	4949679	567	Peak_12214	239.527	-1.4042	0.244783	9.66456e-09	1.68643e-06
chr3L	1905482	1905913	432	Peak_5507	162.086	-1.47907	0.257927	9.78263e-09	1.68643e-06
chr3L	1822133	1822859	727	Peak_5488	261.156	-1.65391	0.28827	9.61583e-09	1.68643e-06
chr2L	11967853	11969492	1640	Peak_1420	1150.64	-1.22675	0.214422	1.05797e-08	1.80187e-06
chr3R	5786482	5787937	1456	Peak_8946	803.331	-1.79425	0.313858	1.08573e-08	1.82712e-06
chr3L	12086868	12087326	459	Peak_6754	209.87	-1.49334	0.261576	1.13619e-08	1.88955e-06
chr3R	15111573	15113322	1750	Peak_10026	2042.76	-1.27879	0.224367	1.20136e-08	1.9747e-06
chr3L	1827774	1828497	724	Peak_5489	459.176	-1.86493	0.328166	1.32443e-08	2.15197e-06
chr2R	19140185	19140873	689	Peak_4897	222.087	-1.8208	0.320535	1.34309e-08	2.1575e-06
chr3R	10101340	10102074	735	Peak_9407	492.403	-1.45048	0.255528	1.37568e-08	2.18502e-06
chr3L	18620612	18621277	666	Peak_7621	424.199	-1.12502	0.198315	1.40428e-08	2.20565e-06
chr3R	6659869	6661396	1528	Peak_9064	1021.65	-1.10152	0.194241	1.42073e-08	2.20698e-06
chr3L	4727628	4728132	505	Peak_5883	203.348	-1.74372	0.308681	1.61437e-08	2.48052e-06
chr3R	17520174	17520983	810	Peak_10304	481.619	-1.4667	0.260142	1.71963e-08	2.61383e-06
chr2L	18468196	18469171	976	Peak_2037	1237.48	-1.72795	0.308197	2.06274e-08	3.10201e-06
chr2L	15280470	15281558	1089	Peak_1789	318.915	-1.57313	0.281252	2.22781e-08	3.31499e-06
chr2R	15852644	15853831	1188	Peak_4471	467.868	-1.14454	0.205079	2.39176e-08	3.52187e-06
chr3L	7623105	7624168	1064	Peak_6166	407.679	-1.47714	0.266442	2.9574e-08	4.30987e-06
chr3R	11477279	11478363	1085	Peak_9590	622.028	-1.55748	0.281439	3.13024e-08	4.51522e-06
chr3R	2514041	2515064	1024	Peak_8504	419.248	-1.53127	0.277171	3.30207e-08	4.71495e-06
chr3R	27534610	27535419	810	Peak_11416	434.063	-1.29353	0.234248	3.35051e-08	4.73628e-06
chr3R	3804057	3805066	1010	Peak_8653	474.356	-1.0747	0.194789	3.44387e-08	4.82005e-06
chr3L	9049484	9050054	571	Peak_6370	308.017	-1.18508	0.214985	3.54042e-08	4.9066e-06
chr3L	16188249	16189235	987	Peak_7288	1354.89	-1.66367	0.302783	3.91607e-08	5.37452e-06
chr3L	50761	51343	583	Peak_5188	354.397	-1.53919	0.281492	4.55223e-08	6.18753e-06
chr3R	10324166	10325161	996	Peak_9456	564.559	-1.07107	0.196081	4.6971e-08	6.26398e-06
chr2L	7573063	7574984	1922	Peak_924	1146.1	-1.21133	0.221737	4.68312e-08	6.26398e-06
chr2L	15387722	15389784	2063	Peak_1814	1407.85	-0.912971	0.167816	5.31865e-08	7.02658e-06
chr2L	5739007	5739602	596	Peak_686	250.686	-1.41049	0.259944	5.75897e-08	7.53786e-06
chr2L	11384148	11385661	1514	Peak_1381	551.955	-1.48644	0.274333	6.01511e-08	7.80089e-06
chrX	8937921	8938299	379	Peak_12671	131.655	1.57896	0.291649	6.16585e-08	7.85229e-06
chr3R	14275856	14276432	577	Peak_9923	446.804	1.00306	0.185265	6.15655e-08	7.85229e-06
chr2L	15742886	15744438	1553	Peak_1835	1411.44	-0.884775	0.163631	6.40389e-08	8.08263e-06
chrX	8751603	8752114	512	Peak_12648	248.325	-1.11961	0.207275	6.60513e-08	8.25483e-06
chr2R	3081343	3081989	647	Peak_2755	214.307	-1.53955	0.285092	6.65712e-08	8.25483e-06
chr3R	17664459	17665425	967	Peak_10323	922.025	-1.36273	0.252765	6.99583e-08	8.59939e-06
chrX	6225684	6226344	661	Peak_12340	266.149	-1.36206	0.253008	7.30599e-08	8.90323e-06
chrX	9921325	9922030	706	Peak_12787	288.935	-1.80269	0.335311	7.60823e-08	9.1923e-06
chr2R	7535865	7536361	497	Peak_3397	285.269	-1.59768	0.29892	9.0492e-08	1.08406e-05
chr3L	3074128	3075771	1644	Peak_5628	1305.14	-1.08586	0.203455	9.4438e-08	1.12183e-05
chr3R	4751470	4752420	951	Peak_8786	963.871	-1.02447	0.192383	1.00881e-07	1.18837e-05
chr2L	1927377	1927817	441	Peak_265	159.301	1.66729	0.313215	1.01998e-07	1.19161e-05
chr3R	14311317	14311963	647	Peak_9934	357.316	-1.65645	0.312086	1.11038e-07	1.28658e-05
chr3R	19333355	19335058	1704	Peak_10512	785.637	-1.16343	0.219558	1.16448e-07	1.31689e-05
chr3R	492581	493995	1415	Peak_8241	780.721	-1.56076	0.294533	1.16381e-07	1.31689e-05
chr2R	15709772	15710500	729	Peak_4444	403.196	-1.64701	0.310805	1.16328e-07	1.31689e-05
chrX	1503964	1510033	6070	Peak_11752	4469.94	-1.03365	0.195445	1.23173e-07	1.371e-05
chr3R	2078494	2079049	556	Peak_8461	312.193	-1.06737	0.2018	1.22814e-07	1.371e-05
chr2R	11386079	11386641	563	Peak_3901	234.968	-1.44296	0.273875	1.37403e-07	1.51745e-05
chr2R	14155146	14158045	2900	Peak_4248	1409.78	-0.921269	0.175099	1.42942e-07	1.56637e-05
chr2R	1638195	1639372	1178	Peak_2568	1188.22	-1.06829	0.203426	1.50882e-07	1.64067e-05
chr3L	1904856	1905271	416	Peak_5506	160.662	-1.31809	0.251217	1.54734e-07	1.66971e-05
chr3R	26109597	26111402	1806	Peak_11258	1290.93	-1.46054	0.278672	1.59639e-07	1.68408e-05
chr2R	13723224	13724425	1202	Peak_4191	386.503	-1.50876	0.287834	1.59037e-07	1.68408e-05
chr3L	12908805	12909244	440	Peak_6883	196.048	-1.79339	0.342031	1.57681e-07	1.68408e-05
chr3R	17030457	17030797	341	Peak_10213	95.79	1.55033	0.296118	1.64516e-07	1.72267e-05
chr2R	15162767	15163289	523	Peak_4392	280.815	-1.59775	0.306468	1.85386e-07	1.92692e-05
chr2L	15457544	15458107	564	Peak_1825	251.831	-1.39318	0.268058	2.02214e-07	2.08649e-05
chr2L	847553	848890	1338	Peak_151	1484.2	-1.32958	0.255981	2.0574e-07	2.10749e-05
chr2R	7591515	7592745	1231	Peak_3409	418.35	-1.462	0.281802	2.12511e-07	2.14812e-05
chrX	3575900	3576920	1021	Peak_12041	407.739	-1.59706	0.307846	2.12745e-07	2.14812e-05
chr3R	21031055	21031841	787	Peak_10722	987.388	-0.971624	0.187403	2.16401e-07	2.15345e-05
chr2L	20434703	20435233	531	Peak_2278	238.431	-1.07776	0.207867	2.16151e-07	2.15345e-05
chr3R	23025996	23028139	2144	Peak_10938	1613.6	-1.24987	0.241128	2.17843e-07	2.15345e-05
chr2L	13115841	13116169	329	Peak_1545	100.968	-1.37329	0.265803	2.38447e-07	2.34075e-05
chr3L	18197133	18197843	711	Peak_7584	303.674	1.23114	0.238609	2.47422e-07	2.41211e-05
chr2L	14207377	14208086	710	Peak_1648	434.07	-1.52374	0.296015	2.63956e-07	2.55567e-05
chrX	13031037	13032050	1014	Peak_13108	304.154	-1.33054	0.258686	2.69703e-07	2.59356e-05
chrX	17626248	17626796	549	Peak_13664	179.12	-1.64602	0.320451	2.79809e-07	2.67255e-05
chr3L	13256622	13257567	946	Peak_6933	469.944	-1.11529	0.217352	2.87827e-07	2.73069e-05
chr3L	17604638	17605672	1035	Peak_7488	1215.2	-1.42836	0.278625	2.95243e-07	2.78237e-05
chr3R	7816784	7817606	823	Peak_9182	399.113	-1.15305	0.22517	3.04283e-07	2.84857e-05
chrX	19770802	19771608	807	Peak_13968	492.712	-1.11398	0.217847	3.16125e-07	2.93996e-05
chr2R	6087162	6088095	934	Peak_3176	348.512	-0.964645	0.189059	3.35468e-07	3.09946e-05
chr3R	20028695	20029750	1056	Peak_10604	436.516	-1.26074	0.247396	3.46831e-07	3.18364e-05
chr2L	21860535	21861141	607	Peak_2453	272.118	-1.70813	0.335291	3.49738e-07	3.18961e-05
chrX	6536717	6537797	1081	Peak_12374	459.084	-1.09978	0.216156	3.6204e-07	3.28064e-05
chr3R	4293773	4296395	2623	Peak_8730	1228.69	-0.831206	0.16344	3.66285e-07	3.29797e-05
chr3L	484662	485600	939	Peak_5264	428.449	-1.44958	0.285166	3.70945e-07	3.31879e-05
chr3R	22965422	22966226	805	Peak_10923	214.828	-1.17106	0.230589	3.80338e-07	3.38142e-05
chr3R	19312325	19312982	658	Peak_10507	173.258	-1.31525	0.259081	3.8429e-07	3.3952e-05
chr2L	1573464	1574579	1116	Peak_223	797.393	-0.946546	0.186559	3.90122e-07	3.41655e-05
chr2R	5169585	5170264	680	Peak_3052	416.684	-1.17634	0.231881	3.9154e-07	3.41655e-05
chrX	1865458	1866862	1405	Peak_11800	915.174	-1.05948	0.209639	4.33021e-07	3.75532e-05
chr2L	19987000	19987892	893	Peak_2239	496.336	-1.02479	0.202915	4.41037e-07	3.78995e-05
chr2L	14386225	14387435	1211	Peak_1673	895.389	-1.36311	0.269936	4.42375e-07	3.78995e-05
chr2R	18901934	18902546	613	Peak_4858	267.997	-1.34531	0.266972	4.67684e-07	3.98264e-05
chrX	4069699	4070801	1103	Peak_12107	528.233	-1.27779	0.253959	4.86668e-07	4.11949e-05
chr2L	18002864	18004106	1243	Peak_1999	671.864	-0.855989	0.170648	5.27301e-07	4.41061e-05
chr3L	21097704	21098174	471	Peak_7944	197.253	-1.48529	0.296067	5.25576e-07	4.41061e-05
chr2L	7132594	7133305	712	Peak_861	237.321	-1.47652	0.294531	5.35526e-07	4.45306e-05
chr2L	5376221	5376917	697	Peak_657	962.248	-0.895082	0.178821	5.57256e-07	4.60665e-05
chr3R	21893541	21894133	593	Peak_10822	240.411	-1.46898	0.293689	5.67938e-07	4.66765e-05
chr3L	4708078	4708543	466	Peak_5878	168.01	-1.54177	0.309182	6.14485e-07	5.02101e-05
chrX	16092445	16093633	1189	Peak_13456	608.45	-1.26872	0.255576	6.90011e-07	5.60575e-05
chr2L	18465164	18466386	1223	Peak_2034	730.352	-1.59107	0.321029	7.19052e-07	5.80829e-05
chrX	279682	280229	548	Peak_11598	203.378	-1.47653	0.298246	7.39443e-07	5.93907e-05
chr2R	9640917	9641580	664	Peak_3667	349.529	-1.00566	0.203337	7.58358e-07	5.98891e-05
chrX	6237037	6238547	1511	Peak_12343	1008.42	-1.14986	0.232459	7.55634e-07	5.98891e-05
chr3L	22819653	22820054	402	Peak_8154	134.449	-1.53076	0.309495	7.5749e-07	5.98891e-05
chrX	12130571	12131137	567	Peak_13025	178.014	1.18681	0.240372	7.91734e-07	6.21775e-05
chr3L	3513308	3514591	1284	Peak_5713	559.514	-1.41154	0.286407	8.28911e-07	6.43818e-05
chr3R	17150392	17151155	764	Peak_10226	275.068	-1.6136	0.327402	8.28657e-07	6.43818e-05
chr3R	11941544	11942299	756	Peak_9634	369.091	-1.10239	0.223892	8.48872e-07	6.55719e-05
chr3L	4519439	4519880	442	Peak_5861	175.545	-1.25013	0.254009	8.58393e-07	6.55905e-05
chrX	21054934	21055248	315	Peak_14048	80.7323	-1.30764	0.265671	8.56573e-07	6.55905e-05
chr2L	19989159	19989957	799	Peak_2240	654.682	-0.902096	0.183597	8.94779e-07	6.80032e-05
chrX	14791268	14791777	510	Peak_13304	175.726	-1.44518	0.294276	9.06271e-07	6.85083e-05
chr3L	5947275	5948653	1379	Peak_5978	456.989	-1.08977	0.221995	9.15359e-07	6.88272e-05
chr3L	1387915	1388807	893	Peak_5424	244.692	-1.35645	0.276641	9.42544e-07	7.04963e-05
chr2R	3195969	3196931	963	Peak_2775	818.695	-1.08038	0.220423	9.51694e-07	7.0806e-05
chr2L	3004204	3005109	906	Peak_388	398.243	-1.1489	0.234467	9.57997e-07	7.09018e-05
chr2R	6957664	6958719	1056	Peak_3286	551.91	-1.03563	0.211586	9.84963e-07	7.25179e-05
chrX	13206052	13206778	727	Peak_13140	211.073	-1.15628	0.236467	1.00927e-06	7.39225e-05
chr2R	7726806	7727830	1025	Peak_3428	634.25	-1.12291	0.22999	1.0478e-06	7.55698e-05
chr2R	10304033	10304808	776	Peak_3769	399.679	-1.26664	0.259412	1.04619e-06	7.55698e-05
chr3L	10932780	10934145	1366	Peak_6579	711.008	-1.53844	0.315007	1.04042e-06	7.55698e-05
chr3R	3262526	3263012	487	Peak_8618	243.842	-1.11718	0.228981	1.06666e-06	7.63499e-05
chr2L	15458393	15458956	564	Peak_1826	243.461	-1.26637	0.259586	1.06942e-06	7.63499e-05
chr3L	783011	783300	290	Peak_5346	86.1812	1.37379	0.281854	1.09301e-06	7.68694e-05
chr2L	14995392	14996171	780	Peak_1769	806.275	-0.989741	0.203026	1.08838e-06	7.68694e-05
chr3L	21594989	21595507	519	Peak_8004	224.087	-1.48436	0.304454	1.08549e-06	7.68694e-05
chr3R	17959935	17960648	714	Peak_10359	367.214	1.19517	0.245552	1.13144e-06	7.91783e-05
chr3R	18008747	18010546	1800	Peak_10375	616.757	-1.07328	0.220714	1.15757e-06	8.02654e-05
chr3L	3712265	3712733	469	Peak_5743	134.996	-1.31288	0.269994	1.15833e-06	8.02654e-05
chr2L	11247295	11248421	1127	Peak_1358	267.019	1.41835	0.291936	1.1832e-06	8.09438e-05
chr2R	5681882	5683236	1355	Peak_3108	520.655	-1.10217	0.226872	1.18498e-06	8.09438e-05
chr3R	27389745	27390306	562	Peak_11389	218.169	-1.24933	0.257166	1.1853e-06	8.09438e-05
chrX	7871121	7872154	1034	Peak_12551	373.763	-1.41948	0.292262	1.19252e-06	8.10453e-05
chr3L	6929591	6930558	968	Peak_6091	448.286	-1.45784	0.300824	1.25882e-06	8.51418e-05
chrX	6669260	6670279	1020	Peak_12401	678.749	-0.907115	0.187357	1.28768e-06	8.62683e-05
chrX	1925066	1925717	652	Peak_11807	279.608	-1.45708	0.300895	1.28229e-06	8.62683e-05
chr2L	9126966	9127603	638	Peak_1111	392.201	-1.29451	0.267816	1.34088e-06	8.94089e-05
chr2L	4068896	4070399	1504	Peak_507	1391.78	-1.19658	0.247873	1.38327e-06	9.18026e-05
chr3L	16182884	16183357	474	Peak_7286	258.507	-1.18181	0.244882	1.39278e-06	9.20016e-05
chr2R	14548753	14550415	1663	Peak_4321	678.974	-0.929979	0.193081	1.46086e-06	9.60497e-05
chr3R	11632452	11634263	1812	Peak_9598	1043.15	-1.18552	0.246879	1.57067e-06	0.000102792
chrX	18570251	18571281	1031	Peak_13783	508.005	-1.50741	0.314105	1.59414e-06	0.00010337
chr2L	2201920	2203777	1858	Peak_300	2027.41	-1.85913	0.387374	1.59208e-06	0.00010337
chr3L	18198471	18199442	972	Peak_7585	346.859	1.14251	0.238617	1.68396e-06	0.000108696
chr2L	5435575	5436218	644	Peak_663	389.477	-0.975724	0.204019	1.73116e-06	0.000111235
chr3R	27318476	27318926	451	Peak_11375	125.63	1.5476	0.323682	1.74224e-06	0.000111441
chr3R	19850018	19850823	806	Peak_10578	388.937	-1.39583	0.292492	1.82215e-06	0.000116027
chr2L	1570131	1570805	675	Peak_222	304.485	-1.27411	0.2671	1.84095e-06	0.000116698
chr3L	19046750	19047049	300	Peak_7684	104.858	-1.27727	0.267846	1.85447e-06	0.00011703
chr3R	886183	887503	1321	Peak_8313	1181.14	-1.10834	0.232504	1.87014e-06	0.000117495
chr3R	27111692	27112258	567	Peak_11353	168.769	-1.39086	0.291866	1.8847e-06	0.000117885
chr2R	15696501	15697310	810	Peak_4441	300.43	-1.20183	0.252284	1.89999e-06	0.000118318
chr2R	12983221	12983788	568	Peak_4099	486.34	-0.979466	0.205934	1.97248e-06	0.000121455
chr2R	6954101	6954914	814	Peak_3284	202.01	-1.11743	0.234901	1.96476e-06	0.000121455
chr3L	10439852	10440230	379	Peak_6491	132.951	-1.18259	0.248661	1.97613e-06	0.000121455
chr3R	10503371	10504092	722	Peak_9475	433.47	-1.26167	0.26535	1.98689e-06	0.000121587
chr3L	2130150	2130496	347	Peak_5522	74.183	1.60436	0.337997	2.06785e-06	0.000125996
chr3L	22381902	22382758	857	Peak_8112	1168.49	-0.899999	0.189667	2.08354e-06	0.000126171
chr3R	25025486	25026557	1072	Peak_11087	767.619	-1.25559	0.264631	2.08857e-06	0.000126171
chr3R	1037734	1038272	539	Peak_8335	181.707	1.38075	0.291168	2.1152e-06	0.000127236
chr3R	4053668	4054506	839	Peak_8700	307.731	-1.50086	0.316717	2.14984e-06	0.000128772
chr2L	3000415	3001066	652	Peak_387	257.862	-1.44048	0.304101	2.17071e-06	0.000129473
chr3R	2780469	2781135	667	Peak_8544	418.154	-1.43214	0.302727	2.23659e-06	0.000132842
chr2L	1455805	1456873	1069	Peak_205	355.687	-1.17028	0.2476	2.28425e-06	0.000135106
chr3L	6831299	6831786	488	Peak_6081	192.008	-0.93939	0.199016	2.35634e-06	0.000138788
chr2R	19452896	19453551	656	Peak_4928	290.085	-1.57313	0.334254	2.52155e-06	0.000147903
chr2L	4340105	4340787	683	Peak_523	430.124	-1.24114	0.263786	2.53724e-06	0.000148208
chr2L	9816176	9816948	773	Peak_1190	306.626	-0.998197	0.212199	2.55052e-06	0.000148371
chr3L	15933767	15934505	739	Peak_7233	235.085	-1.21616	0.258854	2.62425e-06	0.000152034
chr3L	18233464	18234812	1349	Peak_7602	1985.14	-1.13969	0.242958	2.71991e-06	0.000156933
chr2L	14297350	14298250	901	Peak_1660	662.076	-0.861373	0.183718	2.75132e-06	0.0001581
chr2R	9350235	9351047	813	Peak_3632	410.827	-1.08188	0.231025	2.82733e-06	0.00016181
chr2R	7494493	7496108	1616	Peak_3385	2592.04	-0.97233	0.207905	2.91397e-06	0.000166051
chr2R	2434439	2435521	1083	Peak_2665	595.364	-1.21174	0.259139	2.92493e-06	0.000166051
chr3L	2846885	2849008	2124	Peak_5603	1328.07	-1.06882	0.228799	2.99092e-06	0.000169119
chrX	20041420	20042328	909	Peak_13977	250.17	1.46614	0.314371	3.10554e-06	0.0001749
chr2R	18537149	18537615	467	Peak_4815	118.47	1.49876	0.321554	3.14698e-06	0.000176531
chrX	10702508	10703161	654	Peak_12871	354.459	1.33848	0.287269	3.17283e-06	0.000177188
chr3L	21714170	21714922	753	Peak_8029	715.585	-1.34078	0.287807	3.18377e-06	0.000177188
chr3L	13092914	13094122	1209	Peak_6909	728.515	-1.09411	0.235483	3.38051e-06	0.000187399
chr3L	1456890	1458251	1362	Peak_5437	582.554	-1.15276	0.248519	3.50926e-06	0.000193543
chr3R	19649237	19649867	631	Peak_10545	203.84	-1.22334	0.263767	3.51872e-06	0.000193543
chr2R	8299444	8300661	1218	Peak_3500	555.499	-0.996637	0.215136	3.61126e-06	0.000197863
chr3L	7084116	7085131	1016	Peak_6107	477.737	-1.28059	0.276487	3.62764e-06	0.000197993
chr3L	8649351	8651570	2220	Peak_6301	1172.55	-0.935986	0.202126	3.64419e-06	0.000198132
chr2R	10854848	10855511	664	Peak_3834	994.07	-0.781494	0.168839	3.68078e-06	0.000198594
chrX	4919144	4921462	2319	Peak_12203	747.354	-1.33145	0.287613	3.66876e-06	0.000198594
chr4	850314	850823	510	Peak_11534	199.926	-1.42194	0.307266	3.69737e-06	0.00019873
chrX	1885924	1886278	355	Peak_11802	91.935	1.5244	0.329767	3.78838e-06	0.00020285
chr2R	14829598	14830228	631	Peak_4362	231.601	-1.6105	0.348683	3.85955e-06	0.000205882
chr2R	7463772	7464250	479	Peak_3373	199.205	-0.977873	0.212048	3.99632e-06	0.000212376
chr2R	5118465	5119312	848	Peak_3044	402.033	0.928928	0.201477	4.0152e-06	0.00021258
chr3L	22137465	22138058	594	Peak_8080	231.679	1.24656	0.270859	4.17974e-06	0.000220466
chr2R	14830726	14831542	817	Peak_4363	352.364	-1.31317	0.285578	4.2597e-06	0.000223848
chr3L	14537112	14537886	775	Peak_7070	252.632	-1.22946	0.267597	4.33897e-06	0.000225499
chrX	16822575	16823005	431	Peak_13556	172.47	-1.25961	0.274098	4.31762e-06	0.000225499
chr3L	18006017	18006996	980	Peak_7547	2038.3	-1.2791	0.278377	4.33025e-06	0.000225499
chr2L	14381776	14382511	736	Peak_1671	726.836	-1.07988	0.235607	4.57496e-06	0.000236892
chr3L	12825368	12826149	782	Peak_6879	1069.46	-0.945695	0.20651	4.66292e-06	0.000240566
chrX	20371588	20372863	1276	Peak_14007	1299.88	-0.738885	0.161505	4.76221e-06	0.000244795
chr2R	10201500	10202323	824	Peak_3754	305.9	-0.864862	0.189248	4.87719e-06	0.000247111
chr2L	16406394	16407391	998	Peak_1878	349.296	-1.11111	0.243108	4.86754e-06	0.000247111
chr3L	18057725	18058309	585	Peak_7559	511.797	-1.33333	0.291697	4.85514e-06	0.000247111
chr3R	6327886	6328587	702	Peak_9007	327.938	-1.38744	0.303574	4.86944e-06	0.000247111
chr2L	20965063	20965611	549	Peak_2343	367.193	-0.960048	0.210304	4.99401e-06	0.000252126
chr3R	11939884	11941116	1233	Peak_9633	446.243	-1.14953	0.251885	5.02568e-06	0.000252822
chr3L	11118701	11119129	429	Peak_6622	120.966	1.16269	0.255042	5.14401e-06	0.000257857
chr3R	25388986	25389664	679	Peak_11147	202.652	-1.38811	0.304556	5.16901e-06	0.000258195
chr2R	18260597	18261045	449	Peak_4779	169.338	1.22641	0.269365	5.28931e-06	0.00026235
chr2R	10307336	10307866	531	Peak_3770	274.295	-1.0383	0.228046	5.28735e-06	0.00026235
chr2R	2675783	2676917	1135	Peak_2709	948.291	-0.902171	0.19861	5.56131e-06	0.000274034
chrX	1208599	1209260	662	Peak_11719	408.355	-1.08556	0.238988	5.56365e-06	0.000274034
chr3L	3259551	3260603	1053	Peak_5668	249.469	-1.43095	0.315429	5.71917e-06	0.000280716
chr3R	4783287	4784153	867	Peak_8796	467.86	-0.902857	0.199195	5.82805e-06	0.000284087
chr3R	21271499	21272806	1308	Peak_10740	661.49	-1.29052	0.284692	5.8143e-06	0.000284087
chr3L	4119041	4119373	333	Peak_5787	122.667	1.17282	0.258996	5.94524e-06	0.000287815
chr3L	21053205	21053629	425	Peak_7939	145.698	-1.27235	0.280971	5.9427e-06	0.000287815
chr2R	20225076	20227245	2170	Peak_5056	1029.88	-1.13474	0.250668	5.98613e-06	0.000288805
chr3R	23513967	23514672	706	Peak_10981	187.25	-1.45782	0.32224	6.06746e-06	0.000291733
chr3L	13120778	13121616	839	Peak_6915	261.579	-1.51608	0.335258	6.12191e-06	0.000293354
chrX	2345645	2348282	2638	Peak_11887	2082.86	-0.672412	0.149089	6.4788e-06	0.000309406
chr2L	21923556	21924155	600	Peak_2465	266.634	-1.20315	0.267295	6.75678e-06	0.000321575
chrX	5664360	5665302	943	Peak_12260	340.905	-1.5126	0.336094	6.7791e-06	0.000321575
chr2L	20956127	20957849	1723	Peak_2341	1024.65	-0.8761	0.194824	6.89572e-06	0.000326013
chr3L	3250211	3250785	575	Peak_5664	271.313	1.17111	0.260514	6.94426e-06	0.000327214
chr2L	1424611	1425406	796	Peak_197	492.609	0.950101	0.211432	7.0014e-06	0.00032881
chr3R	857549	858088	540	Peak_8305	221.708	1.16179	0.258677	7.08001e-06	0.000331401
chr2L	7104191	7105273	1083	Peak_857	320.226	-1.52741	0.340252	7.15415e-06	0.000333766
chr2L	5249298	5250640	1343	Peak_637	1426.13	-1.1107	0.24747	7.18207e-06	0.000333966
chr3R	15076324	15077455	1132	Peak_10017	423.283	-1.28678	0.286836	7.25409e-06	0.000335453
chr2L	18045871	18046423	553	Peak_2002	160.056	-1.47265	0.328285	7.26151e-06	0.000335453
chr3L	666123	667941	1819	Peak_5307	874.816	-0.932429	0.207966	7.34072e-06	0.000338008
chr3L	14639039	14640900	1862	Peak_7090	684.844	-0.868911	0.193913	7.43193e-06	0.000339993
chr3R	9671094	9672541	1448	Peak_9348	837.973	-1.21102	0.270223	7.40969e-06	0.000339993
chrX	13538472	13539075	604	Peak_13183	178.632	-1.32011	0.29474	7.50278e-06	0.000342127
chr3L	16353986	16355088	1103	Peak_7313	322.164	-1.31461	0.293723	7.61639e-06	0.000346191
chr3L	16182117	16182618	502	Peak_7285	157.272	-1.43063	0.319723	7.65633e-06	0.00034689
chr2R	3639986	3640453	468	Peak_2847	167.865	-1.51283	0.338226	7.71851e-06	0.000348591
chr2R	8910240	8911842	1603	Peak_3594	1048.92	-0.941807	0.21088	7.96625e-06	0.000358634
chrX	14609488	14609886	399	Peak_13280	153.742	-1.03688	0.232264	8.03622e-06	0.000359494
chr3L	22172096	22173494	1399	Peak_8087	929.858	-1.12304	0.251542	8.02095e-06	0.000359494
chr3L	17231093	17231798	706	Peak_7431	458.142	-1.1802	0.26448	8.1072e-06	0.000361525
chr2R	13323738	13325349	1612	Peak_4126	973.945	-1.28084	0.287089	8.14022e-06	0.000361856
chr3L	5124306	5124657	352	Peak_5895	110.845	-1.1816	0.265212	8.37801e-06	0.000371259
chrX	14571509	14572667	1159	Peak_13276	369.234	-1.47656	0.331497	8.41935e-06	0.000371925
chr2R	12498882	12499756	875	Peak_4043	432.541	-1.02218	0.229811	8.6699e-06	0.0003818
chr2L	18121330	18122626	1297	Peak_2005	515.798	-1.29434	0.291264	8.83556e-06	0.000387886
chr3R	20809142	20810228	1087	Peak_10691	491.112	-0.944369	0.212744	9.03781e-06	0.000395537
chr3L	16315118	16315566	449	Peak_7306	154.079	-1.13638	0.256091	9.10458e-06	0.000396007
chr2R	16036584	16037655	1072	Peak_4501	508.711	-1.15487	0.260252	9.10082e-06	0.000396007
chr3L	12106374	12106879	506	Peak_6762	333.458	-1.09849	0.247652	9.18042e-06	0.000398081
chrX	1165618	1166067	450	Peak_11710	151.547	1.1607	0.261766	9.24468e-06	0.000398423
chr2L	22366796	22367352	557	Peak_2494	183.886	-1.05663	0.238261	9.2178e-06	0.000398423
chr3L	5604592	5605577	986	Peak_5929	899.558	-0.818732	0.184809	9.41663e-06	0.0004046
chr3R	25441674	25442670	997	Peak_11154	481.407	-0.825151	0.186452	9.62003e-06	0.000412087
chr2L	611271	611842	572	Peak_111	251.215	-1.29646	0.293128	9.74167e-06	0.000416037
chr2L	499557	500386	830	Peak_82	429.314	-1.22983	0.278228	9.86005e-06	0.000419824
chr2R	8796164	8798062	1899	Peak_3565	1338.39	-0.917251	0.207667	1.00111e-05	0.000424976
chr3L	16035571	16037672	2102	Peak_7254	2184.91	-0.69828	0.1582	1.01524e-05	0.000429684
chr2R	9784961	9785730	770	Peak_3678	501.218	0.757424	0.171719	1.02972e-05	0.000434512
chr3R	27329601	27331882	2282	Peak_11377	1873.55	-0.904609	0.205154	1.03652e-05	0.000436079
chr3L	5940917	5942237	1321	Peak_5975	539.182	-1.17076	0.265665	1.04851e-05	0.000439816
chr2R	11123907	11125462	1556	Peak_3870	678.585	-0.914268	0.207529	1.05539e-05	0.000441391
chr2L	3555207	3556739	1533	Peak_442	530.581	1.15368	0.262015	1.06706e-05	0.000444955
chr2R	6951349	6952121	773	Peak_3282	474.28	-0.997134	0.226706	1.09071e-05	0.000453477
chr3R	16108209	16109091	883	Peak_10114	580.879	-1.12559	0.2561	1.1071e-05	0.000458569
chr2R	1773220	1773705	486	Peak_2577	157.904	-1.29283	0.294181	1.10944e-05	0.000458569
chr3R	4106246	4106933	688	Peak_8715	255.578	-1.00964	0.229854	1.12044e-05	0.000460845
chr3L	1076910	1077502	593	Peak_5379	190.359	-1.53721	0.349977	1.12147e-05	0.000460845
chrX	10703563	10704657	1095	Peak_12872	385.522	1.25788	0.28671	1.14772e-05	0.000470266
chr3L	20593231	20594334	1104	Peak_7865	782.661	-0.899587	0.205117	1.15603e-05	0.000472301
chr2R	13386763	13387959	1197	Peak_4136	710.796	0.989093	0.225724	1.17662e-05	0.000479329
chrX	980847	981578	732	Peak_11674	398.845	-0.925831	0.211524	1.20345e-05	0.000488851
chr3R	19250329	19251770	1442	Peak_10499	489.247	-1.27001	0.290731	1.25189e-05	0.000507071
chr2L	4656793	4657207	415	Peak_567	101.682	1.49312	0.343228	1.35997e-05	0.000544988
chr3R	21827898	21829459	1562	Peak_10798	3211.83	-0.905347	0.208048	1.35131e-05	0.000544988
chr2R	1571027	1571978	952	Peak_2553	325.861	-1.14504	0.263167	1.35509e-05	0.000544988
chr3R	10211594	10212508	915	Peak_9432	303.734	-1.17885	0.270995	1.36093e-05	0.000544988
chr3L	6295399	6296361	963	Peak_6015	264.549	-1.00377	0.230856	1.37369e-05	0.000547524
chr3R	22859928	22860517	590	Peak_10911	234.862	-1.11156	0.255659	1.37501e-05	0.000547524
chr3L	4395106	4396881	1776	Peak_5843	633.605	-1.25779	0.289485	1.39315e-05	0.000553191
chrX	14047987	14048562	576	Peak_13250	219.93	-1.1167	0.257334	1.42812e-05	0.000565487
chr3L	3393854	3396066	2213	Peak_5692	1872.11	-0.775693	0.178951	1.45985e-05	0.000573235
chr2R	17620976	17622703	1728	Peak_4707	1533.35	-0.933738	0.2154	1.4583e-05	0.000573235
chr3L	806752	808298	1547	Peak_5351	691.372	-1.10231	0.254287	1.45818e-05	0.000573235
chr2L	7357863	7358533	671	Peak_896	259.914	-1.14365	0.263973	1.47466e-05	0.000577447
chr3R	2857215	2857819	605	Peak_8563	180.768	-1.38323	0.319332	1.47995e-05	0.000577918
chr3L	10988943	10989403	461	Peak_6597	204.946	-0.896214	0.207067	1.50374e-05	0.000585587
chrX	12119678	12121210	1533	Peak_13024	1184.82	-0.778884	0.180023	1.51442e-05	0.000588127
chr2L	2466543	2467762	1220	Peak_327	1182.79	-1.20057	0.277619	1.52862e-05	0.000592017
chr3L	15218358	15219364	1007	Peak_7164	383.858	-1.31419	0.303965	1.53573e-05	0.000593146
chrX	19123433	19124525	1093	Peak_13857	733.052	-0.773317	0.179335	1.61677e-05	0.000622743
chr2L	622115	622766	652	Peak_115	240.854	1.15814	0.268938	1.65977e-05	0.000632585
chr2L	11219277	11220263	987	Peak_1355	528.358	-0.780626	0.181262	1.65771e-05	0.000632585
chr3L	15207272	15207935	664	Peak_7159	281.242	-1.13759	0.26414	1.65661e-05	0.000632585
chr2L	7898327	7900236	1910	Peak_959	1111.15	-1.16919	0.271508	1.66022e-05	0.000632585
chrX	6890169	6890531	363	Peak_12435	128.747	0.935157	0.217206	1.66684e-05	0.000633397
chr3R	870630	871647	1018	Peak_8309	622.936	-0.993443	0.230937	1.69427e-05	0.000642097
chr3L	10968717	10971029	2313	Peak_6593	657.292	-1.22336	0.284453	1.70212e-05	0.000643345
chr2L	11220680	11221769	1090	Peak_1356	716.582	-0.738976	0.171986	1.73343e-05	0.000653432
chr3L	19674052	19674791	740	Peak_7752	263.826	-1.23812	0.288383	1.76028e-05	0.00066179
chr3R	21826554	21827410	857	Peak_10797	426.367	1.35153	0.315232	1.80772e-05	0.000675103
chr3R	23814728	23815151	424	Peak_11006	159.541	-1.10504	0.257689	1.80074e-05	0.000675103
chr2R	19313283	19314456	1174	Peak_4918	643.369	-1.6222	0.378389	1.81002e-05	0.000675103
chr3L	13205381	13206116	736	Peak_6924	294.554	-1.1251	0.262579	1.829e-05	0.000680389
chr3R	19740022	19741865	1844	Peak_10557	909.189	-0.996154	0.232532	1.83615e-05	0.000680853
chr3L	10960772	10961999	1228	Peak_6591	354.062	-1.07232	0.250339	1.83988e-05	0.000680853
chr2L	18664667	18666318	1652	Peak_2068	1057.07	-0.834537	0.195027	1.87668e-05	0.000692657
chr2R	10368254	10370363	2110	Peak_3782	1638.49	0.624053	0.145869	1.88434e-05	0.000693671
chr2R	11362284	11362734	451	Peak_3893	106.861	1.38225	0.323375	1.91613e-05	0.000701719
chr3L	16967847	16968944	1098	Peak_7410	573.124	-0.894375	0.20923	1.91483e-05	0.000701719
chr3R	2488481	2489188	708	Peak_8498	175.055	1.22152	0.285832	1.92376e-05	0.000701935
chr3R	2928522	2929536	1015	Peak_8573	774.605	-1.01833	0.238305	1.92665e-05	0.000701935
chr2R	20820194	20820724	531	Peak_5141	246.101	-1.2382	0.289848	1.93807e-05	0.000704281
chr2R	8420240	8421841	1602	Peak_3519	573.151	-1.28731	0.301855	2.00211e-05	0.000725688
chr3R	21467061	21467614	554	Peak_10769	244.171	1.1831	0.277543	2.01924e-05	0.000730025
chr3L	13212545	13213147	603	Peak_6927	123.522	1.55091	0.364156	2.05414e-05	0.000740747
chr2R	12598649	12598985	337	Peak_4050	145.905	-1.26125	0.296422	2.09131e-05	0.000752234
chr3L	21785770	21786057	288	Peak_8039	73.8756	1.47466	0.347029	2.14361e-05	0.000768446
chr2R	4531607	4532930	1324	Peak_2951	532.399	-0.972566	0.228893	2.14726e-05	0.000768446
chr2L	21993108	21994087	980	Peak_2471	449.802	-1.00296	0.23622	2.1775e-05	0.000777301
chr2R	11005361	11006901	1541	Peak_3855	1020.77	-0.648863	0.152868	2.18984e-05	0.000779739
chr2L	15314403	15314905	503	Peak_1795	153.966	-1.11425	0.262734	2.22526e-05	0.00079036
chr2L	3498881	3499809	929	Peak_433	341.954	-1.13852	0.268562	2.24175e-05	0.000794221
chrX	2949306	2950049	744	Peak_11966	465.321	-0.900328	0.212434	2.25369e-05	0.000794691
chr3L	17612243	17612754	512	Peak_7491	342.044	-1.16493	0.274872	2.25432e-05	0.000794691
chrX	19772324	19772974	651	Peak_13969	409.045	-0.807452	0.190777	2.31161e-05	0.000812859
chr3L	3244679	3245958	1280	Peak_5662	951.992	-1.22444	0.289713	2.37464e-05	0.00083295
chr3L	17919427	17919805	379	Peak_7522	125.037	-1.27094	0.300825	2.39112e-05	0.000836654
chr3R	11744894	11746237	1344	Peak_9605	1620.91	-0.856594	0.202979	2.4418e-05	0.000852279
chr3R	4794791	4795812	1022	Peak_8798	672.436	-1.08382	0.257073	2.48697e-05	0.000865908
chr3R	17764081	17765305	1225	Peak_10341	803.584	-0.790695	0.18779	2.54779e-05	0.000884903
chr2R	8858231	8858715	485	Peak_3578	186.887	1.48046	0.351684	2.55773e-05	0.000886178
chr3R	17432165	17432884	720	Peak_10274	614.232	-0.926824	0.220293	2.58516e-05	0.000892429
chr3L	10336321	10337245	925	Peak_6475	328.349	-1.059	0.251725	2.5884e-05	0.000892429
chrX	20101916	20102370	455	Peak_13984	246.724	-1.24691	0.296835	2.66105e-05	0.000915245
chr2R	14129534	14130251	718	Peak_4240	660.372	-0.768268	0.18316	2.73461e-05	0.00093373
chr2R	10670097	10671323	1227	Peak_3807	594.254	-1.1882	0.283243	2.72903e-05	0.00093373
chr3R	4973238	4973839	602	Peak_8825	224.267	-1.37371	0.327455	2.72731e-05	0.00093373
chr3L	5623550	5624219	670	Peak_5938	940.722	-0.821214	0.196102	2.81826e-05	0.00095597
chr3R	15079664	15080210	547	Peak_10019	302.094	-0.854394	0.204086	2.83356e-05	0.00095597
chr3L	6317697	6318171	475	Peak_6019	138.64	-1.07917	0.257727	2.82352e-05	0.00095597
chr3L	8768069	8768751	683	Peak_6329	449.321	-1.15576	0.276057	2.8309e-05	0.00095597
chr3L	4270961	4271420	460	Peak_5821	234.946	-1.21367	0.289763	2.80801e-05	0.00095597
chr3L	12094743	12095272	530	Peak_6759	277.498	1.11594	0.266856	2.89214e-05	0.000971101
chr2R	11138126	11138715	590	Peak_3874	317.859	-0.874994	0.209212	2.88529e-05	0.000971101
chr2R	6162839	6163323	485	Peak_3190	149.036	1.38825	0.332463	2.97125e-05	0.000986699
chr2R	15507148	15508058	911	Peak_4425	623.738	-0.838712	0.20087	2.97465e-05	0.000986699
chr2L	1886753	1888348	1596	Peak_259	575.614	-1.10959	0.265771	2.98021e-05	0.000986699
chr2L	1458436	1459583	1148	Peak_206	659.74	-1.13334	0.271496	2.98746e-05	0.000986699
chr3L	14603243	14603749	507	Peak_7076	212.224	-1.13842	0.272682	2.9814e-05	0.000986699
chr3R	13263280	13263575	296	Peak_9825	105.634	-1.16786	0.279631	2.96115e-05	0.000986699
chr3L	16357387	16357919	533	Peak_7314	160.813	-1.18615	0.283955	2.95084e-05	0.000986699
chr2L	18871195	18872504	1310	Peak_2100	436.545	-1.05911	0.253814	3.00884e-05	0.000991443
chr3L	17970881	17971610	730	Peak_7534	346.478	-1.60518	0.38482	3.02928e-05	0.000995859
chrX	13139565	13140763	1199	Peak_13124	337.708	-1.18866	0.28509	3.05378e-05	0.00100158
chr3L	8812267	8813037	771	Peak_6334	675.745	-0.874669	0.209825	3.0652e-05	0.001003
chr2L	7860439	7861276	838	Peak_947	319.774	-1.0937	0.262441	3.08069e-05	0.00100343
chr3L	12583537	12584209	673	Peak_6833	302.066	-1.3301	0.319179	3.08285e-05	0.00100343
chr2L	19328399	19329912	1514	Peak_2162	698.597	-1.35894	0.326128	3.0878e-05	0.00100343
chr3R	19297797	19298851	1055	Peak_10505	1909.27	-0.689067	0.1654	3.09889e-05	0.00100472
chr2L	12467593	12467955	363	Peak_1467	92.8671	1.34146	0.322608	3.2082e-05	0.00103778
chr3R	2041043	2041782	740	Peak_8456	553.91	-0.854334	0.205611	3.25143e-05	0.00104937
chr3R	6355263	6355658	396	Peak_9013	138.436	1.17546	0.283047	3.28344e-05	0.00105065
chrX	3580606	3581579	974	Peak_12044	899.178	-0.733961	0.1767	3.27122e-05	0.00105065
chrX	3330835	3332538	1704	Peak_12025	793.081	-0.780194	0.187864	3.28172e-05	0.00105065
chr3R	26395532	26397128	1597	Peak_11292	1224.99	-0.803893	0.193581	3.28515e-05	0.00105065
chr3R	21825143	21825696	554	Peak_10796	163.386	1.32596	0.319445	3.31291e-05	0.00105714
chr3L	8414789	8415418	630	Peak_6269	290.74	-1.02123	0.246082	3.3257e-05	0.00105883
chr3R	19355654	19356220	567	Peak_10514	243.34	-0.891361	0.214903	3.35767e-05	0.00106661
chr3L	15208196	15208882	687	Peak_7160	211.322	-1.4234	0.343458	3.40828e-05	0.00108026
chr3R	15106802	15109926	3125	Peak_10024	1847.45	-0.672937	0.162435	3.43067e-05	0.00108453
chr2R	4951042	4952726	1685	Peak_3017	584.801	-1.12272	0.271033	3.43712e-05	0.00108453
chr3L	5779651	5780260	610	Peak_5949	290.557	-0.926188	0.223774	3.48905e-05	0.00109847
chrX	9824819	9825375	557	Peak_12775	472.099	0.888058	0.21474	3.54164e-05	0.00111255
chr2L	14425469	14427226	1758	Peak_1684	783.385	-1.08805	0.263298	3.5901e-05	0.00112527
chr2R	8890274	8891281	1008	Peak_3588	486.324	-0.784509	0.189922	3.61681e-05	0.00113113
chr2L	16686429	16687220	792	Peak_1924	967.61	-0.865221	0.209599	3.65956e-05	0.00114198
chrX	16674988	16675320	333	Peak_13535	109.902	1.29083	0.313038	3.73075e-05	0.00116163
chrX	11672660	11673485	826	Peak_12978	330.11	-1.32554	0.321551	3.75048e-05	0.00116521
chrX	5910332	5911655	1324	Peak_12302	730.157	-0.848681	0.20609	3.82156e-05	0.00118209
chr3L	21245296	21247926	2631	Peak_7962	3381.59	-0.986373	0.239498	3.81342e-05	0.00118209
chrX	11438177	11438745	569	Peak_12943	348.271	-1.12619	0.273603	3.85248e-05	0.00118905
chr3R	13895627	13896606	980	Peak_9872	320.538	-0.878058	0.213612	3.94744e-05	0.00121265
chr3R	25102822	25104454	1633	Peak_11105	979.462	-1.12336	0.273316	3.95466e-05	0.00121265
chr3L	18094746	18095110	365	Peak_7564	119.228	-1.25361	0.304996	3.95253e-05	0.00121265
chrX	9608001	9608404	404	Peak_12758	105.371	1.35487	0.3299	4.00954e-05	0.00122442
chr2L	1485973	1486964	992	Peak_215	457.467	-0.922475	0.224617	4.01038e-05	0.00122442
chr2R	12491579	12492165	587	Peak_4042	305.861	0.957232	0.233168	4.03732e-05	0.00122999
chrX	9362006	9363307	1302	Peak_12722	407.106	-1.20062	0.292489	4.04604e-05	0.00123
chr2R	4881732	4882551	820	Peak_3004	467.41	-1.20221	0.293173	4.11924e-05	0.00124956
chr3L	16814205	16814550	346	Peak_7384	84.179	1.36497	0.333006	4.15068e-05	0.0012564
chrX	2192762	2193717	956	Peak_11863	658.533	-0.955392	0.233318	4.22524e-05	0.00127081
chr3R	14613724	14614926	1203	Peak_9958	841.029	-1.14364	0.279268	4.21935e-05	0.00127081
chr3L	801863	803219	1357	Peak_5349	631.929	-1.26006	0.307698	4.21947e-05	0.00127081
chr3R	12031749	12032445	697	Peak_9651	519.707	-0.8387	0.205067	4.31571e-05	0.00129526
chr2L	14392251	14393354	1104	Peak_1675	550.223	-1.11522	0.272718	4.32701e-05	0.0012959
chr2L	3352272	3353637	1366	Peak_416	479.153	-0.930553	0.227827	4.41756e-05	0.00132023
chr3R	17684706	17686003	1298	Peak_10328	892.138	-0.594982	0.1457	4.43396e-05	0.00132233
chr3R	20537928	20538668	741	Peak_10660	346.722	-0.952511	0.233356	4.46902e-05	0.00132998
chr3L	7736768	7737215	448	Peak_6176	227.749	-1.10595	0.271091	4.51069e-05	0.00133956
chr3R	19015918	19017476	1559	Peak_10463	992.123	0.745384	0.182745	4.52661e-05	0.00134147
chr3L	11372990	11373917	928	Peak_6669	909.932	-0.81348	0.199487	4.54516e-05	0.00134415
chr3R	11459501	11460768	1268	Peak_9584	441.094	-1.01302	0.248852	4.68595e-05	0.00138289
chr3L	4532801	4533642	842	Peak_5863	946.508	-0.87064	0.21391	4.69902e-05	0.00138386
chr2R	15518842	15519817	976	Peak_4428	598.103	-0.985665	0.242272	4.73326e-05	0.00139105
chrX	20780926	20781881	956	Peak_14022	296.771	-0.912844	0.224868	4.91858e-05	0.00144251
chr3L	22344112	22345263	1152	Peak_8099	800.397	-1.05044	0.258947	4.97956e-05	0.00145737
chr3R	10394284	10394885	602	Peak_9459	193.625	1.0941	0.269944	5.05486e-05	0.00147635
chr2R	8553283	8553608	326	Peak_3536	168.905	0.967311	0.2389	5.14331e-05	0.00149909
chr3L	8484115	8484633	519	Peak_6278	188.83	1.24772	0.308266	5.17601e-05	0.00150552
chr2L	16281828	16282477	650	Peak_1862	383.557	-0.922803	0.228059	5.20252e-05	0.00151012
chrX	15535207	15536635	1429	Peak_13378	846.249	-1.17735	0.291024	5.22025e-05	0.00151216
chr3R	27770437	27771018	582	Peak_11446	365.839	-1.12083	0.277188	5.26423e-05	0.00152026
chr3L	18025936	18026318	383	Peak_7553	101.314	-1.4568	0.360298	5.26972e-05	0.00152026
chr3R	12939522	12939819	298	Peak_9804	95.6919	1.02833	0.254736	5.41745e-05	0.00155653
chr3L	22813158	22813740	583	Peak_8152	240.769	-1.2752	0.315882	5.41488e-05	0.00155653
chr2L	14890417	14890929	513	Peak_1767	135.011	1.34016	0.332119	5.45589e-05	0.00156122
chr2R	17476899	17477645	747	Peak_4681	458.651	-0.990529	0.24547	5.45489e-05	0.00156122
chrX	5713844	5714710	867	Peak_12265	245.947	-1.15833	0.287326	5.54392e-05	0.00158321
chr2R	15844579	15845059	481	Peak_4468	182.349	-1.40884	0.349514	5.55786e-05	0.00158399
chr3R	3780028	3780493	466	Peak_8643	189.965	-1.36316	0.338426	5.62691e-05	0.00160044
chr3L	5829443	5829939	497	Peak_5958	139.637	-1.05179	0.261181	5.64763e-05	0.00160311
chrX	5436847	5437369	523	Peak_12238	159.562	1.04625	0.259916	5.68981e-05	0.00160862
chr3L	12695955	12696645	691	Peak_6859	187.043	-1.29794	0.322428	5.68472e-05	0.00160862
chr2R	20252798	20253536	739	Peak_5063	315.848	-1.00069	0.248773	5.75859e-05	0.00162482
chr3L	7603417	7604203	787	Peak_6162	535.284	-1.17817	0.292998	5.79328e-05	0.00163135
chr3L	10351823	10352485	663	Peak_6480	214.646	-1.32881	0.330645	5.84857e-05	0.00164365
chr2L	5228643	5229040	398	Peak_627	123.486	0.992741	0.247299	5.96156e-05	0.00167208
chr3L	3784851	3786136	1286	Peak_5749	780.998	-0.891406	0.222294	6.07126e-05	0.00169947
chr3L	16155236	16155554	319	Peak_7273	104.75	1.30993	0.326863	6.13464e-05	0.00171382
chr2L	1886449	1886674	226	Peak_258	71.2333	1.29911	0.324377	6.20365e-05	0.00172628
chrX	16824174	16825467	1294	Peak_13557	538.805	-1.00177	0.250115	6.19515e-05	0.00172628
chrX	3291846	3292337	492	Peak_12013	122.84	1.38917	0.346953	6.2304e-05	0.00173031
chr3L	18388696	18389034	339	Peak_7614	73.4619	1.54715	0.386519	6.25996e-05	0.00173232
chr3L	16469894	16470801	908	Peak_7327	592.914	-0.738727	0.184557	6.26214e-05	0.00173232
chr2R	18290861	18292123	1263	Peak_4786	1147.83	-0.748825	0.187312	6.3949e-05	0.00176559
chr2R	19608682	19610513	1832	Peak_4955	1169.35	-0.807936	0.202178	6.43755e-05	0.0017739
chr3L	10911409	10911942	534	Peak_6573	155.713	-1.22083	0.305588	6.46891e-05	0.00177908
chr3L	5614935	5615637	703	Peak_5933	368.128	-1.28712	0.322589	6.60795e-05	0.00181379
chr3L	11359546	11360073	528	Peak_6663	302.335	-0.994412	0.249324	6.65127e-05	0.00182214
chr3L	10921381	10922376	996	Peak_6577	276.382	-1.08272	0.271734	6.76259e-05	0.00184905
chrX	17811557	17812075	519	Peak_13700	184.361	-1.22493	0.307585	6.82247e-05	0.00186182
chr2R	15754608	15755267	660	Peak_4453	229.341	-1.37241	0.344739	6.86241e-05	0.00186911
chr2R	18284738	18285621	884	Peak_4783	856.922	-0.871914	0.219133	6.92272e-05	0.00188191
chr2L	11206785	11207193	409	Peak_1353	153.599	1.0451	0.263155	7.14506e-05	0.00192753
chr2L	14528878	14529396	519	Peak_1711	286.475	-0.885514	0.222951	7.1337e-05	0.00192753
chr2L	21770249	21771040	792	Peak_2432	346.497	-1.00933	0.254112	7.12724e-05	0.00192753
chr2L	15482807	15483173	367	Peak_1831	122.366	-1.25752	0.316595	7.12643e-05	0.00192753
chr2L	21979917	21980646	730	Peak_2470	386.436	-1.01555	0.25576	7.166e-05	0.0019295
chrX	4906360	4907060	701	Peak_12199	207.971	-1.08164	0.272548	7.22899e-05	0.00194276
chr3L	9761019	9761539	521	Peak_6447	293.748	-1.22955	0.309897	7.25972e-05	0.00194731
chrX	17145899	17146530	632	Peak_13593	493.843	-0.98982	0.249646	7.34291e-05	0.0019659
chr3L	13021612	13022934	1323	Peak_6891	1617.99	-0.743799	0.187673	7.39294e-05	0.0019745
chr2L	17245571	17246229	659	Peak_1963	165.371	-1.24808	0.314937	7.40298e-05	0.0019745
chr2R	11370916	11371734	819	Peak_3897	656.27	-0.745017	0.18803	7.42551e-05	0.00197577
chrX	12785159	12786411	1253	Peak_13089	1028.71	-0.835968	0.211002	7.4357e-05	0.00197577
chr3R	16106017	16106843	827	Peak_10113	251.177	1.2271	0.309782	7.45837e-05	0.00197808
chr3R	26114760	26115400	641	Peak_11260	213.7	-1.22072	0.308398	7.5502e-05	0.00199599
chr2L	7597062	7597520	459	Peak_926	103.433	-1.36516	0.344901	7.55414e-05	0.00199599
chr3L	8660834	8662899	2066	Peak_6306	1948.88	-0.820158	0.207236	7.57056e-05	0.00199659
chr2R	18885646	18886739	1094	Peak_4856	1141.44	-1.02118	0.258097	7.60279e-05	0.00200136
chr2R	12963452	12964498	1047	Peak_4093	471.836	-0.808921	0.204473	7.61747e-05	0.0020015
chrX	9534737	9535581	845	Peak_12747	320.901	1.10243	0.279045	7.7911e-05	0.00203577
chr2R	11112680	11114306	1627	Peak_3869	783.427	-0.965289	0.244296	7.7727e-05	0.00203577
chr3R	6658428	6658993	566	Peak_9063	197.643	-1.02773	0.260136	7.79043e-05	0.00203577
chr2R	11400816	11401447	632	Peak_3903	535.019	-0.773302	0.195834	7.8555e-05	0.00204646
chr2L	19904523	19906151	1629	Peak_2225	472.331	-1.25606	0.318102	7.86098e-05	0.00204646
chr2L	12520264	12520717	454	Peak_1476	340.14	0.924077	0.234062	7.88089e-05	0.00204787
chr3L	437487	438041	555	Peak_5258	256.547	-1.15632	0.293428	8.12349e-05	0.00210704
chr2L	20997869	20998349	481	Peak_2346	133.347	-1.35353	0.343632	8.18583e-05	0.00211932
chr2R	10221551	10221959	409	Peak_3759	123.193	1.17725	0.299398	8.42164e-05	0.00216869
chr3R	19125837	19127077	1241	Peak_10478	689.25	-0.646247	0.164321	8.39532e-05	0.00216869
chr2R	9353697	9355307	1611	Peak_3635	746.967	-0.763848	0.194262	8.42254e-05	0.00216869
chrX	9145942	9146663	722	Peak_12709	690.208	-0.971535	0.247147	8.45942e-05	0.00217423
chr3L	8037829	8038707	879	Peak_6218	374.384	-0.846233	0.215389	8.53492e-05	0.00218965
chr2L	6078654	6079445	792	Peak_727	326.83	-1.20066	0.305873	8.66064e-05	0.00221788
chr2R	18043964	18045252	1289	Peak_4745	431.811	-1.09038	0.277943	8.74471e-05	0.00223536
chrX	4953709	4954211	503	Peak_12215	157.135	1.46203	0.372984	8.86134e-05	0.00225701
chrX	14615571	14615944	374	Peak_13282	134.622	1.25441	0.320009	8.85718e-05	0.00225701
chr3L	5794892	5795899	1008	Peak_5951	1418.51	-0.76882	0.196204	8.91104e-05	0.00226558
chr3R	14889592	14890835	1244	Peak_9989	648.11	-0.763446	0.194928	8.98262e-05	0.0022756
chrX	2933330	2934233	904	Peak_11961	312.543	-1.05515	0.269407	8.98144e-05	0.0022756
chrX	13785887	13786638	752	Peak_13215	301.766	1.09167	0.278865	9.05251e-05	0.0022892
chr3R	6342457	6344723	2267	Peak_9009	1021.37	-1.1346	0.29018	9.22995e-05	0.0023299
chr3R	11288864	11290304	1441	Peak_9568	701.681	-0.891079	0.228252	9.46439e-05	0.00238482
chr3R	10678238	10678862	625	Peak_9502	501.508	-0.819388	0.209959	9.51582e-05	0.00239352
chr2L	6701546	6702110	565	Peak_800	247.064	-0.968965	0.248424	9.60159e-05	0.0024108
chr2R	2394154	2394994	841	Peak_2650	294.864	-1.18459	0.303857	9.67786e-05	0.00242564
chr2L	21008166	21010508	2343	Peak_2351	3061.25	-0.704946	0.180998	9.82909e-05	0.00245919
chrX	13829949	13830760	812	Peak_13219	297.04	-1.2643	0.325365	0.000101995	0.00254735
chr3L	5854954	5857470	2517	Peak_5965	1539.41	-0.753061	0.193859	0.000102507	0.0025533
chr3R	6329351	6329908	558	Peak_9008	284.173	-1.10282	0.283913	0.000102594	0.0025533
chr2R	11622273	11623654	1382	Peak_3928	1579.87	-0.696171	0.179395	0.000104169	0.00258794
chrX	16099633	16100255	623	Peak_13457	240.908	-1.09679	0.282816	0.000105273	0.00261077
chr3R	21890292	21890992	701	Peak_10821	251.353	-1.01838	0.262648	0.00010559	0.00261405
chr3R	25544307	25544716	410	Peak_11161	126.889	-1.08093	0.279127	0.000107705	0.00266175
chr3L	18269334	18269810	477	Peak_7609	134.296	-1.44239	0.373003	0.000110203	0.00271872
chr2R	17681789	17682331	543	Peak_4712	126.495	1.32496	0.342705	0.00011055	0.00272254
chr3L	1584775	1585607	833	Peak_5456	264.297	-1.13045	0.292436	0.0001108	0.00272394
chr3R	4687555	4688849	1295	Peak_8779	887.704	-0.668103	0.172886	0.000111353	0.00273279
chr3R	10294024	10295071	1048	Peak_9448	368.19	-0.928302	0.240314	0.000112059	0.00274507
chr2L	6184733	6185444	712	Peak_738	276.512	-0.94138	0.243724	0.000112242	0.00274507
chr3R	17774058	17775210	1153	Peak_10343	364.023	-0.951577	0.246437	0.000112764	0.00275308
chr2L	18752953	18753724	772	Peak_2084	397.497	0.98125	0.254168	0.000113094	0.00275637
chr3L	15775106	15775581	476	Peak_7225	219.899	-1.11581	0.289134	0.000113776	0.00276823
chr2R	6124748	6126724	1977	Peak_3185	1046.59	-1.06056	0.275039	0.000115249	0.00279445
chr3R	21914588	21915252	665	Peak_10828	193.175	-1.27756	0.331284	0.000115068	0.00279445
chr3L	4251977	4252630	654	Peak_5816	643.627	-0.784183	0.203411	0.000115654	0.00279947
chr2R	14237415	14238043	629	Peak_4269	209.164	0.968679	0.251319	0.000116025	0.00280364
chr3L	12033159	12033954	796	Peak_6739	712.579	-0.901422	0.234001	0.000117056	0.00282372
chr3R	26514923	26516568	1646	Peak_11296	679.34	-1.11331	0.289562	0.000120647	0.00290539
chr3R	19052315	19052801	487	Peak_10470	190.733	0.938458	0.244183	0.00012141	0.0029188
chr3R	19548313	19549697	1385	Peak_10525	556.476	-0.672132	0.175015	0.000122821	0.00294771
chrX	18569144	18569764	621	Peak_13782	417.349	-0.959224	0.249886	0.000123713	0.00296407
chr3L	13871849	13872251	403	Peak_6964	150.872	-1.0392	0.270764	0.000124021	0.00296643
chr2L	16520114	16521861	1748	Peak_1897	1095.4	0.607132	0.158275	0.000125089	0.00298693
chr3R	17425291	17425803	513	Peak_10270	318.73	-1.00666	0.262568	0.000126126	0.00300662
chrX	14881859	14882357	499	Peak_13312	145.054	1.28572	0.33547	0.000126799	0.00300892
chr3L	4307560	4308270	711	Peak_5830	429.479	-0.967475	0.252442	0.000126862	0.00300892
chrX	10696812	10697376	565	Peak_12868	351.327	-1.1986	0.312692	0.000126511	0.00300892
chr2L	21871563	21872123	561	Peak_2458	164.641	1.10888	0.289385	0.000127183	0.00301054
chr3L	20192289	20192668	380	Peak_7811	151.865	0.959929	0.250535	0.000127356	0.00301054
chr2L	21811846	21812230	385	Peak_2443	111.63	-1.30303	0.340176	0.000127911	0.00301861
chr3L	15755395	15757027	1633	Peak_7222	1404.48	-0.982271	0.256485	0.000128275	0.00302215
chr2L	13272338	13272991	654	Peak_1570	191.582	-1.30395	0.340965	0.000131143	0.0030846
chr3L	14329133	14330063	931	Peak_7034	389.467	1.01691	0.265967	0.000131606	0.00309032
chr3R	23418434	23419764	1331	Peak_10971	507.414	-0.855969	0.224148	0.000134121	0.00314416
chr3L	3347604	3347999	396	Peak_5685	124.446	1.26287	0.331217	0.000137391	0.00321244
chr3L	13052625	13053416	792	Peak_6901	319.717	1.17393	0.307947	0.00013778	0.00321244
chr2L	17242604	17244015	1412	Peak_1961	1014.4	-0.718899	0.188637	0.000138397	0.00321244
chr3L	10944542	10946022	1481	Peak_6586	579.459	-0.823352	0.215954	0.000137497	0.00321244
chr2R	11498229	11499032	804	Peak_3918	564.902	-0.923405	0.242274	0.000138179	0.00321244
chr3R	22728721	22729161	441	Peak_10896	164.984	-1.26783	0.332608	0.000137967	0.00321244
chr3R	923759	924435	677	Peak_8322	221.76	0.997316	0.261982	0.00014077	0.00325426
chr3L	8361085	8363124	2040	Peak_6264	670.648	-0.750406	0.197133	0.000140889	0.00325426
chr2L	14369701	14370590	890	Peak_1670	355.086	-1.25265	0.329005	0.000140437	0.00325426
chr3R	1143250	1144065	816	Peak_8355	579.611	-0.842446	0.221344	0.000141203	0.0032562
chr3L	21793422	21794008	587	Peak_8041	389.675	-0.9848	0.25886	0.000142161	0.00327294
chr3L	15181403	15183106	1704	Peak_7149	1257.2	-0.683616	0.179722	0.000142523	0.00327466
chr3R	3151672	3152080	409	Peak_8607	131.393	-0.985962	0.259237	0.000142769	0.00327466
chr2L	6081144	6081945	802	Peak_728	499.24	-1.17512	0.308995	0.00014293	0.00327466
chr2L	1412154	1413615	1462	Peak_193	542.225	-1.21363	0.319248	0.000143814	0.00328957
chr3R	26133254	26134523	1270	Peak_11263	288.568	1.04388	0.274892	0.000146212	0.00332291
chr3L	7364487	7365147	661	Peak_6145	293.308	-0.77212	0.203269	0.00014557	0.00332291
chr2R	9917457	9918138	682	Peak_3714	485.884	-0.937845	0.246961	0.000146135	0.00332291
chr3R	17264262	17264876	615	Peak_10248	240.784	-1.09704	0.288872	0.00014607	0.00332291
chrX	87619	88574	956	Peak_11574	607.143	1.19497	0.314852	0.000147448	0.00334562
chr3L	5618213	5618687	475	Peak_5935	206.489	-1.02689	0.270786	0.000149291	0.003382
chr3R	9619983	9620907	925	Peak_9338	672.041	-0.765357	0.201864	0.000149776	0.00338758
chr3R	9047885	9048527	643	Peak_9273	278.408	1.10012	0.290273	0.000150677	0.00339795
chr2L	6709959	6710576	618	Peak_804	211.506	-1.00911	0.266264	0.000150715	0.00339795
chr3L	15536663	15537419	757	Peak_7194	312.984	-1.03507	0.273362	0.000152826	0.00344005
chr3L	1940091	1940525	435	Peak_5511	199.478	-1.1767	0.310903	0.000153854	0.00345768
chrX	6754127	6755008	882	Peak_12414	551.805	0.823918	0.21778	0.000154785	0.00346644
chrX	18445634	18447153	1520	Peak_13763	1065.91	-0.557464	0.147337	0.000154573	0.00346644
chr3R	19018910	19019504	595	Peak_10465	544.623	-0.739475	0.195504	0.000155324	0.00346644
chr2L	12601590	12602218	629	Peak_1492	354.106	-1.14797	0.303521	0.00015547	0.00346644
chrX	9794024	9794447	424	Peak_12773	146.61	-1.22543	0.323944	0.000155044	0.00346644
chr2R	10874055	10874866	812	Peak_3838	578.234	-0.754116	0.199568	0.000157627	0.00350349
chr2R	15985627	15986061	435	Peak_4493	115.362	-1.15343	0.305243	0.000157625	0.00350349
chr2R	16916876	16917929	1054	Peak_4597	642.318	-1.12682	0.29843	0.000159484	0.00353919
chrX	13266259	13266663	405	Peak_13152	153.807	1.14218	0.302573	0.000160083	0.00354542
chr3L	12107272	12107771	500	Peak_6763	137.755	-1.0764	0.285168	0.000160266	0.00354542
chr3L	10959170	10959879	710	Peak_6590	355.043	-0.890017	0.235885	0.000161233	0.00356123
chr3L	16150496	16151890	1395	Peak_7271	743.384	1.14592	0.303779	0.000161811	0.00356843
chr3R	27515868	27516452	585	Peak_11411	241.671	1.07163	0.284171	0.000162542	0.00357339
chr2L	7872194	7873085	892	Peak_952	420.518	0.779914	0.206811	0.000162502	0.00357339
chrX	6768243	6768720	478	Peak_12421	193.785	0.795382	0.211109	0.000164803	0.00361747
chr3R	17165058	17165704	647	Peak_10229	308.918	-1.09233	0.290141	0.00016667	0.00365278
chr3L	12688335	12689093	759	Peak_6857	264.05	-0.962056	0.255614	0.000167412	0.00366142
chr3L	1111627	1112392	766	Peak_5387	213.882	-1.22639	0.325867	0.000167582	0.00366142
chr3L	3978238	3978544	307	Peak_5777	102.986	0.917656	0.243883	0.000168096	0.00366699
chr3L	16207952	16208369	418	Peak_7297	159.431	-1.08218	0.288013	0.000171677	0.00373933
chr3L	6425989	6426581	593	Peak_6039	194.773	-0.99637	0.265271	0.000172623	0.00374962
chr2L	630762	631187	426	Peak_117	164.7	-1.07126	0.285217	0.00017268	0.00374962
chr2L	9058202	9058757	556	Peak_1106	322.711	-0.835094	0.222597	0.000175716	0.00380969
chrX	19739680	19740064	385	Peak_13961	184.103	-1.05379	0.28095	0.000176255	0.00381553
chrX	13963220	13964132	913	Peak_13238	257.961	-1.07662	0.287078	0.000176648	0.0038182
chr2L	11020638	11021994	1357	Peak_1320	946.111	-0.811172	0.216339	0.000177152	0.00382325
chrX	5916749	5917100	352	Peak_12306	96.547	1.19223	0.318302	0.000179976	0.003875
chrX	6600744	6601210	467	Peak_12386	175.566	1.09226	0.291626	0.000180098	0.003875
chrX	843448	844036	589	Peak_11661	269.053	-1.03027	0.275129	0.000180621	0.00388033
chr3R	7674959	7675601	643	Peak_9151	242.194	-1.1951	0.319288	0.000181835	0.00390033
chr3R	25360608	25361462	855	Peak_11140	219.491	-1.29028	0.344751	0.000182104	0.00390033
chr2R	16056003	16056408	406	Peak_4508	97.2527	1.3401	0.358267	0.00018366	0.00390992
chr3R	9823185	9823873	689	Peak_9379	227.019	1.19151	0.318453	0.000182889	0.00390992
chr3R	21821572	21823510	1939	Peak_10795	2524.34	-0.631602	0.168914	0.000184603	0.00390992
chr2R	20239236	20240319	1084	Peak_5061	801.729	-0.845698	0.226124	0.000184042	0.00390992
chr3R	17967333	17967777	445	Peak_10364	168.834	-0.867129	0.231916	0.000184764	0.00390992
chr3R	25922568	25923121	554	Peak_11222	331.225	-0.86864	0.232287	0.000184381	0.00390992
chr3L	6839649	6841243	1595	Peak_6082	1787.07	-0.885251	0.236635	0.000183291	0.00390992
chr3R	4297410	4298372	963	Peak_8731	246.958	-1.0384	0.277712	0.000184651	0.00390992
chrX	200167	200490	324	Peak_11582	97.4187	0.89024	0.238359	0.000187811	0.00396845
chr3R	8493072	8493695	624	Peak_9241	226.717	-0.971238	0.260152	0.000188952	0.0039866
chr3L	2470837	2471742	906	Peak_5555	281.879	-1.19548	0.320261	0.000189349	0.00398903
chr3R	12050132	12050681	550	Peak_9662	275.07	0.816174	0.218881	0.000192352	0.00404627
chr2R	20212730	20213352	623	Peak_5053	257.227	-0.9254	0.24846	0.000195669	0.00410992
chr2L	10791153	10792075	923	Peak_1299	243.33	-1.30765	0.351187	0.000196467	0.00412057
chrX	7229225	7230207	983	Peak_12479	724.809	-0.833198	0.223864	0.000197729	0.00414089
chr2R	2435632	2436992	1361	Peak_2666	1294.96	-1.37754	0.370593	0.000201491	0.00421343
chrX	19768897	19770066	1170	Peak_13967	430.661	-0.906999	0.244186	0.000203707	0.00425348
chr2R	17428468	17431209	2742	Peak_4668	2448.3	-0.637365	0.171643	0.000204571	0.00426521
chr3R	3995846	3996289	444	Peak_8687	143.603	1.0203	0.274871	0.000205699	0.00427612
chr3R	27548705	27549024	320	Peak_11422	117.255	0.977571	0.263342	0.00020549	0.00427612
chr2L	4361352	4362220	869	Peak_526	307.468	-1.11984	0.301918	0.00020802	0.00431801
chr2L	485473	486113	641	Peak_77	319.342	-0.874703	0.235919	0.000209206	0.00433626
chr2R	20574712	20576248	1537	Peak_5105	467.514	0.982145	0.265047	0.000210937	0.00436574
chr3R	24357424	24358247	824	Peak_11018	254.537	-1.01476	0.273924	0.000211793	0.00437067
chr2L	12640326	12640689	364	Peak_1501	146.936	-1.17751	0.317848	0.00021171	0.00437067
chr3R	12047785	12048519	735	Peak_9660	528.704	0.696896	0.188169	0.000212593	0.0043781
chr3L	18155331	18155857	527	Peak_7571	257.119	-0.955362	0.257973	0.000212773	0.0043781
chr2L	11398909	11399599	691	Peak_1385	265.723	-1.09536	0.29597	0.000214817	0.00441375
chrX	18896127	18896429	303	Peak_13835	80.3486	1.3119	0.354738	0.000217108	0.00445433
chr3R	2765625	2766220	596	Peak_8541	272.719	-1.04586	0.282834	0.000217506	0.00445603
chr3L	4349235	4349778	544	Peak_5834	341.376	-0.867431	0.23471	0.000219233	0.00447659
chr2L	16594307	16594887	581	Peak_1909	165.595	-1.12975	0.305691	0.000219266	0.00447659
chr3L	3865085	3865954	870	Peak_5761	297.136	-1.21913	0.329895	0.000219459	0.00447659
chr2R	14143699	14145669	1971	Peak_4244	917.72	-0.584024	0.158153	0.000221807	0.00451146
chr2L	4632511	4632988	478	Peak_562	130.102	-1.09558	0.296655	0.000221519	0.00451146
chr3L	18004573	18005714	1142	Peak_7546	501.524	-1.05758	0.286491	0.000222931	0.0045278
chr3R	12333163	12333793	631	Peak_9728	250.141	-1.05012	0.28457	0.000224074	0.0045445
chrX	11341475	11342311	837	Peak_12927	282.949	1.02653	0.278277	0.000225243	0.00456165
chr2L	5119069	5119666	598	Peak_620	367.909	-0.769148	0.208667	0.000227794	0.00460671
chr2R	2407534	2408695	1162	Peak_2655	486.673	-0.907675	0.246327	0.000228847	0.00461482
chr2L	16591102	16591537	436	Peak_1908	124.5	-1.19452	0.324172	0.000228842	0.00461482
chrX	2830414	2830791	378	Peak_11939	119.377	1.12095	0.304336	0.000230253	0.00463656
chr2R	4915725	4916794	1070	Peak_3012	926.708	-0.886373	0.240791	0.000232235	0.00466981
chrX	17464633	17465682	1050	Peak_13636	557.318	-0.676706	0.183858	0.000232699	0.00467063
chr2R	13722371	13722750	380	Peak_4190	119.578	-1.26663	0.344163	0.000232937	0.00467063
chr3L	15000858	15001779	922	Peak_7121	356.67	-1.0632	0.288918	0.0002333	0.00467129
chr3R	4647394	4647797	404	Peak_8772	121.934	1.23938	0.336966	0.000235026	0.00468402
chr2R	4180921	4181757	837	Peak_2916	869.229	-0.64021	0.17408	0.000235368	0.00468402
chr2R	7902483	7904083	1601	Peak_3452	1795.06	-0.682556	0.185607	0.000235593	0.00468402
chr2L	19916897	19917492	596	Peak_2227	419.899	-0.68272	0.185651	0.000235586	0.00468402
chr3R	25926017	25927312	1296	Peak_11225	481.115	-0.938725	0.255246	0.000235319	0.00468402
chr3L	10706045	10706705	661	Peak_6530	265.422	-1.02636	0.279288	0.000237949	0.00472422
chrX	13967239	13968736	1498	Peak_13239	301.829	-1.16446	0.317098	0.000240453	0.00476723
chr2R	18829561	18830282	722	Peak_4854	299.021	-0.919374	0.250472	0.000242019	0.00479158
chr3L	16273132	16273668	537	Peak_7300	424.412	-0.874716	0.238399	0.000243379	0.00480583
chr2R	4539905	4540565	661	Peak_2957	201.014	-1.21348	0.330731	0.000243419	0.00480583
chrX	13208774	13209870	1097	Peak_13141	486.013	-0.635179	0.173157	0.00024425	0.0048155
chr3L	21217872	21218450	579	Peak_7959	298.498	-1.04988	0.286262	0.000244893	0.00482146
chr3R	9828152	9828760	609	Peak_9380	260.458	-1.03617	0.282569	0.00024544	0.0048255
chrX	3664834	3665588	755	Peak_12062	394.66	0.768828	0.209707	0.00024618	0.00483333
chr2R	1989872	1990469	598	Peak_2600	326.723	-0.915087	0.249729	0.000247988	0.00486178
chrX	3053477	3054185	709	Peak_11986	460.664	-0.959336	0.261828	0.000248317	0.00486178
chr2R	12699833	12700291	459	Peak_4065	156.118	-1.30403	0.356016	0.000249443	0.00487708
chr3R	21835971	21837159	1189	Peak_10801	913.166	-0.618899	0.169119	0.000252656	0.00493308
chr3L	839592	840009	418	Peak_5366	143.21	0.942031	0.257477	0.000253491	0.00493573
chrX	12165576	12166484	909	Peak_13029	279.413	0.853531	0.233266	0.000253149	0.00493573
chrX	8653251	8653790	540	Peak_12640	130.727	1.26589	0.346081	0.000254387	0.00494638
chr2L	704703	705204	502	Peak_136	153.576	1.32729	0.36294	0.000255137	0.00495415
chr3L	16967130	16967694	565	Peak_7409	236.777	-1.09126	0.298445	0.000255708	0.00495843
chrX	16473412	16474000	589	Peak_13498	171.346	0.910068	0.249083	0.000258517	0.00500357
chrX	3301521	3303422	1902	Peak_12017	2339.06	-0.856827	0.234526	0.000258744	0.00500357
chr2R	5437555	5437983	429	Peak_3084	169.815	0.899708	0.246305	0.000259367	0.00500876
chr2R	19460551	19461404	854	Peak_4931	391.2	0.939304	0.257249	0.000260877	0.00502419
chr3R	1982508	1983333	826	Peak_8448	433.431	-0.72763	0.199273	0.00026079	0.00502419
chr2L	3582778	3583470	693	Peak_450	200.148	-1.24872	0.342023	0.000261234	0.00502422
chrX	871498	872108	611	Peak_11662	218.393	-1.20112	0.329065	0.000262147	0.00503494
chr3L	1470100	1470760	661	Peak_5441	267.997	-0.928111	0.254339	0.00026315	0.0050405
chr2L	1066171	1066666	496	Peak_166	204.084	-1.03265	0.282983	0.000263093	0.0050405
chr2R	14058678	14060069	1392	Peak_4218	553.249	0.651538	0.178749	0.000267396	0.0051149
chr2R	2417177	2418155	979	Peak_2659	1089.89	-0.881265	0.241894	0.000269285	0.00514406
chr3R	18378462	18379237	776	Peak_10412	183.572	1.06929	0.293734	0.00027228	0.00519427
chrX	17452556	17453040	485	Peak_13633	166.966	1.10393	0.303327	0.00027326	0.00520473
chr2R	14686626	14687598	973	Peak_4334	681.269	-0.789151	0.216852	0.000273565	0.00520473
chrX	17245527	17246609	1083	Peak_13607	359.344	-0.951416	0.261726	0.000277804	0.00527827
chr3R	1074461	1074866	406	Peak_8342	125.728	0.961303	0.264573	0.000279699	0.00530573
chr3R	12046842	12047667	826	Peak_9659	533.102	0.75603	0.208108	0.000280273	0.00530573
chr3R	7494820	7495876	1057	Peak_9131	457.399	-0.837088	0.230426	0.000280375	0.00530573
chr2L	11959330	11960224	895	Peak_1416	333.013	-1.04459	0.28782	0.000284174	0.00537043
chrX	18298182	18299419	1238	Peak_13749	745.545	0.646205	0.178145	0.000286289	0.00540318
chr3R	2251124	2252501	1378	Peak_8489	745.11	-0.63336	0.174726	0.0002891	0.00544895
chrX	16858027	16858436	410	Peak_13563	141.567	0.824501	0.227666	0.000292856	0.00551241
chr3L	7564095	7564613	519	Peak_6154	287.601	1.09221	0.301836	0.000296259	0.00556904
chrX	19663809	19665609	1801	Peak_13952	868.75	0.994278	0.274917	0.000298438	0.00559511
chr2L	7522307	7523020	714	Peak_917	357.981	-0.724106	0.200205	0.000298242	0.00559511
chr3L	16473551	16473996	446	Peak_7329	159.615	0.811985	0.224609	0.000300227	0.0056212
chr3R	13893843	13894746	904	Peak_9871	280.956	-0.985123	0.272933	0.000306908	0.0057387
chr3R	17962343	17962854	512	Peak_10361	195.508	-1.3329	0.369441	0.000308705	0.00576467
chrX	11404159	11404781	623	Peak_12937	246.771	1.18063	0.327347	0.00031015	0.00577156
chrX	272176	272522	347	Peak_11594	167.62	-0.880377	0.244105	0.000310299	0.00577156
chr2R	11795009	11796302	1294	Peak_3957	529.364	-1.04533	0.289827	0.000310079	0.00577156
chr3R	3789011	3789699	689	Peak_8646	863.412	-0.860069	0.238532	0.000311337	0.00578326
chr2R	6097946	6099293	1348	Peak_3178	931.794	-0.733672	0.20352	0.00031226	0.00578519
chr3R	8140785	8141205	421	Peak_9206	160.825	-0.910619	0.252599	0.000312155	0.00578519
chr3L	1590220	1590683	464	Peak_5458	100.177	1.03767	0.28796	0.000313951	0.00580891
chr3L	7614608	7615467	860	Peak_6165	260.358	1.0115	0.280857	0.00031642	0.00584694
chrX	3274276	3276512	2237	Peak_12006	1265.17	-0.543039	0.150965	0.000321761	0.00593631
chr2L	17781465	17782329	865	Peak_1996	441.683	-0.716134	0.1991	0.000322096	0.00593631
chr2R	6741371	6741823	453	Peak_3261	299.954	0.823305	0.228975	0.000323636	0.00595454
chr3R	17869570	17870707	1138	Peak_10353	957.501	-0.733067	0.203911	0.000324349	0.00595454
chr3L	17604073	17604427	355	Peak_7487	98.4834	-1.3342	0.371091	0.00032397	0.00595454
chr2L	3552032	3553100	1069	Peak_440	391.089	-1.03804	0.288862	0.000326193	0.00598063
chr3L	15201879	15202232	354	Peak_7156	157.863	-0.913126	0.25419	0.000327767	0.0060017
chr3L	470749	471796	1048	Peak_5262	747.827	-0.568983	0.158443	0.000329289	0.00601357
chr2R	16068225	16068877	653	Peak_4512	259.006	-0.840353	0.234005	0.000329191	0.00601357
chr2R	15850012	15850327	316	Peak_4469	86.5947	-1.31627	0.36657	0.000329692	0.00601357
chr3R	19306642	19307646	1005	Peak_10506	296.472	-1.07711	0.300255	0.000334089	0.00608594
chr2L	9192351	9192700	350	Peak_1124	87.5711	1.21932	0.340077	0.000336528	0.00609111
chr2R	15728809	15729335	527	Peak_4447	160.009	0.978962	0.272976	0.000335463	0.00609111
chr3L	20974650	20975711	1062	Peak_7915	375.884	-0.954798	0.266293	0.000336413	0.00609111
chr2L	2908623	2909166	544	Peak_373	278.972	-0.966076	0.269417	0.000336041	0.00609111
chr2L	18457013	18457289	277	Peak_2031	90.1481	-1.30152	0.362889	0.00033507	0.00609111
chrX	1994356	1994750	395	Peak_11826	95.1204	1.21845	0.340004	0.000338833	0.00612491
chr3L	21710020	21710467	448	Peak_8027	178.678	-0.929621	0.259431	0.000339262	0.00612491
chrX	17005589	17006107	519	Peak_13573	144.423	-1.17424	0.327769	0.000340293	0.00612788
chr3R	16109283	16110323	1041	Peak_10115	441.088	-1.38735	0.387225	0.000339951	0.00612788
chrX	12788136	12788756	621	Peak_13090	454.878	-0.810349	0.226309	0.000342641	0.00616231
chrX	2947119	2948006	888	Peak_11965	315.614	-0.782222	0.218485	0.000343317	0.00616662
chr3R	17244947	17245700	754	Peak_10245	385.152	1.03832	0.290147	0.000345424	0.00619564
chr3R	21906677	21908100	1424	Peak_10827	716.009	-0.867855	0.242531	0.000345809	0.00619564
chr2L	17172260	17172762	503	Peak_1954	203.676	-1.17519	0.32849	0.000346834	0.00620614
chr2L	7611629	7612222	594	Peak_928	141.179	-1.17568	0.328716	0.000348128	0.00622141
chr3R	8198307	8199062	756	Peak_9214	397.456	0.901388	0.252181	0.000351069	0.00625975
chr2L	335633	336719	1087	Peak_56	491.473	-0.870029	0.243412	0.000351159	0.00625975
chrX	2217722	2218304	583	Peak_11870	530.507	-0.716381	0.20046	0.000351987	0.00626662
chrX	20850765	20851238	474	Peak_14024	108.61	-1.24688	0.349091	0.000354566	0.00630458
chrX	16765678	16766684	1007	Peak_13547	329.079	-0.87138	0.244005	0.000355402	0.00631057
chr3L	21702382	21704223	1842	Peak_8025	1087.62	-1.09207	0.305828	0.000355796	0.00631057
chr3R	9877184	9877745	562	Peak_9394	241.961	1.16224	0.325593	0.000357496	0.00633278
chr3L	14343109	14344762	1654	Peak_7040	555.84	-1.04834	0.293745	0.000358521	0.00634299
chrX	8007815	8008262	448	Peak_12561	175.646	0.970776	0.272397	0.000365492	0.00645784
chr3L	10768689	10771620	2932	Peak_6545	3312.77	-0.72203	0.202636	0.000366383	0.00645784
chr3L	12101913	12102419	507	Peak_6760	153.544	-1.20298	0.337609	0.000366321	0.00645784
chrX	8658449	8658969	521	Peak_12641	180.575	1.00507	0.282241	0.000369399	0.00650289
chr3R	9849925	9851369	1445	Peak_9388	796.67	1.00782	0.283102	0.000370982	0.00652264
chr3L	6763063	6764582	1520	Peak_6063	1008.43	-0.622708	0.174976	0.000372515	0.00654146
chr3L	3240594	3241084	491	Peak_5660	191.647	-1.04521	0.294251	0.000382161	0.00670251
chrX	2039100	2040814	1715	Peak_11837	1107.22	0.452843	0.127616	0.00038746	0.00678703
chr2R	20254094	20254916	823	Peak_5064	371.884	-1.07047	0.301958	0.000392491	0.00686664
chr3L	14970392	14971176	785	Peak_7114	472.684	-0.80868	0.228259	0.000395882	0.00691741
chrX	4273908	4275573	1666	Peak_12123	906.159	-0.95089	0.26847	0.000397279	0.00693325
chrX	14630477	14631153	677	Peak_13285	207.598	-1.25885	0.355581	0.000399708	0.00696705
chrX	2148102	2148494	393	Peak_11850	142.697	0.994427	0.28103	0.000402396	0.00700526
chr3L	11380057	11380723	667	Peak_6673	302.327	-1.06118	0.300264	0.00040906	0.00711251
chr3R	18023312	18024164	853	Peak_10380	402.472	-0.971676	0.275134	0.000412992	0.00717207
chr2L	2957736	2958281	546	Peak_379	325.821	-0.684882	0.194014	0.000415446	0.00719699
chr3L	22515304	22516411	1108	Peak_8134	265.885	-1.03664	0.293655	0.000415354	0.00719699
chrX	7437445	7438112	668	Peak_12492	359.502	-0.903272	0.255959	0.000417169	0.00721798
chr3R	7600997	7601531	535	Peak_9144	171.003	-0.985261	0.279217	0.000417679	0.00721798
chr3R	6280447	6281494	1048	Peak_8996	378.45	-0.845008	0.239509	0.000418573	0.0072246
chrX	1154229	1154776	548	Peak_11706	147.359	1.0178	0.288642	0.000421629	0.00726848
chr2R	18459976	18460589	614	Peak_4802	327.511	-0.84403	0.239408	0.000422711	0.00727018
chr3L	8489307	8490144	838	Peak_6280	376.788	-0.939035	0.266359	0.000422757	0.00727018
chr3L	14610838	14611192	355	Peak_7081	105.947	1.26591	0.35912	0.000423416	0.00727266
chr3L	11289533	11291634	2102	Peak_6650	1287.98	-0.606442	0.172071	0.000424471	0.00728194
chr2L	9198145	9198920	776	Peak_1125	427.701	-1.04353	0.296292	0.000428374	0.00733999
chr2L	2929801	2931046	1246	Peak_376	251.934	1.04749	0.297547	0.000430878	0.00736978
chrX	17551208	17553446	2239	Peak_13648	1381.77	0.555586	0.157826	0.000431155	0.00736978
chrX	18280101	18280504	404	Peak_13748	105.401	1.18954	0.337996	0.000432562	0.00738489
chr2L	16453400	16453894	495	Peak_1887	188.217	-1.1813	0.335736	0.000433928	0.00739928
chrX	16419606	16420622	1017	Peak_13494	476.878	0.829277	0.235822	0.000437216	0.00744637
chr2R	4477574	4478099	526	Peak_2940	230.121	-0.88637	0.252139	0.000439077	0.00746907
chr2L	12066604	12067196	593	Peak_1436	270.243	-0.757439	0.215641	0.00044392	0.00754237
chr3R	14943715	14945206	1492	Peak_9997	977.663	-0.780793	0.222429	0.000447599	0.00758978
chrX	7424037	7425274	1238	Peak_12487	262.718	-1.06485	0.303359	0.000447784	0.00758978
chr3R	2740034	2740730	697	Peak_8534	441.051	-0.748361	0.213457	0.00045506	0.00769861
chr2R	14470674	14471381	708	Peak_4301	302.714	-1.03264	0.294554	0.000455294	0.00769861
chr2L	6178833	6179524	692	Peak_737	340.926	-0.985988	0.281429	0.000459175	0.00775495
chrX	22229174	22230050	877	Peak_14128	239.961	-1.05024	0.299803	0.000459853	0.00775714
chr3L	16013886	16014479	594	Peak_7247	131.989	1.16085	0.331591	0.000463783	0.00780481
chr2L	22109341	22110089	749	Peak_2479	317.653	-0.771481	0.220358	0.000463454	0.00780481
chr3R	5703158	5703740	583	Peak_8931	179.147	1.14966	0.328608	0.000467753	0.00786226
chr3R	14905000	14906955	1956	Peak_9991	497.393	0.909679	0.260104	0.000469885	0.00787295
chr3L	6241711	6243307	1597	Peak_6003	877.247	-0.678241	0.1939	0.000468948	0.00787295
chr3L	18183313	18184318	1006	Peak_7581	730.276	-0.893417	0.255462	0.00047006	0.00787295
chrX	14733722	14734590	869	Peak_13294	464.063	0.871022	0.249122	0.000471643	0.00788079
chr2L	8468529	8469690	1162	Peak_1048	532.171	-0.630975	0.180453	0.000471189	0.00788079
chr3L	21272907	21273527	621	Peak_7967	250.614	0.813388	0.232672	0.00047253	0.00788629
chr2L	699174	700228	1055	Peak_132	539.405	-0.950259	0.271939	0.000475159	0.0079208
chr3R	19738049	19739129	1081	Peak_10556	763.95	-0.617982	0.177078	0.000483239	0.00803655
chr3R	1932741	1933232	492	Peak_8441	250.309	-0.717638	0.205632	0.00048318	0.00803655
chrX	10478210	10479003	794	Peak_12841	357.446	-0.994515	0.285032	0.000484594	0.00804962
chr3L	21763479	21763866	388	Peak_8034	115.861	1.11295	0.319062	0.000486314	0.00804981
chr3R	21563477	21564475	999	Peak_10780	1310.18	-0.680916	0.195201	0.000486144	0.00804981
chr3R	9104086	9104520	435	Peak_9281	138.338	-1.0246	0.293723	0.000486077	0.00804981
chr3R	17029537	17030200	664	Peak_10212	307.765	0.947883	0.271824	0.000488257	0.00807252
chr3L	2163627	2164609	983	Peak_5532	766.874	-0.645057	0.185121	0.000493023	0.00814179
chr2R	10402465	10403486	1022	Peak_3786	526.462	-0.812122	0.23311	0.000494234	0.00815226
chr3R	5164479	5165730	1252	Peak_8847	721.27	-0.803332	0.230694	0.000497236	0.00819222
chr3R	2247169	2247804	636	Peak_8487	272.034	-1.09454	0.3145	0.000500958	0.00824393
chr3L	15246994	15247700	707	Peak_7172	329.885	0.937053	0.269319	0.000502647	0.00826212
chr2L	11022936	11024629	1694	Peak_1321	1851.08	-0.779329	0.224019	0.000503554	0.00826741
chr3R	12254457	12254832	376	Peak_9713	126.229	-1.02719	0.29539	0.000506271	0.00830237
chr2R	7899773	7900820	1048	Peak_3451	269.847	-1.11262	0.320134	0.000509941	0.00835287
chr3L	4055397	4055896	500	Peak_5781	284.243	-1.05586	0.30408	0.000515966	0.00844178
chr2L	2861485	2861988	504	Peak_364	175.003	1.18066	0.3402	0.000519538	0.00848358
chr3R	9374960	9375446	487	Peak_9313	132.982	-1.0169	0.293022	0.000519721	0.00848358
chr3R	6707291	6708218	928	Peak_9075	617.715	-0.578584	0.166823	0.000523839	0.00854093
chr3R	15101644	15102345	702	Peak_10023	313.617	0.954193	0.275348	0.000529437	0.00861233
chr3R	3720097	3720508	412	Peak_8638	154.269	-1.14099	0.329242	0.00052925	0.00861233
chr3L	6863270	6865175	1906	Peak_6085	727.936	-0.902121	0.26043	0.000532269	0.00864846
chr2L	18741526	18742120	595	Peak_2082	276.217	-1.03401	0.298548	0.000533286	0.00865503
chr2L	3338508	3339918	1411	Peak_411	437.087	-1.0471	0.302548	0.000538266	0.00872584
chr2L	14662780	14663578	799	Peak_1751	271.817	-0.83385	0.240991	0.000539989	0.00873373
chr3R	15397597	15398223	627	Peak_10059	279.625	-1.13491	0.328	0.000539968	0.00873373
chr2L	13512685	13513800	1116	Peak_1589	1229.8	-0.698291	0.201893	0.000542766	0.00876351
chr2R	17188970	17189594	625	Peak_4634	172.67	-0.985789	0.285029	0.00054307	0.00876351
chrX	1305026	1306272	1247	Peak_11733	1331.08	-0.755751	0.218581	0.000545157	0.00878717
chrX	8146187	8147465	1279	Peak_12586	770.662	-0.588282	0.170247	0.000549342	0.00884453
chrX	8801409	8801841	433	Peak_12663	296.686	0.660381	0.19124	0.000554092	0.00891085
chr3R	5707032	5707760	729	Peak_8934	743.305	-0.732856	0.212267	0.000555391	0.00892159
chr3R	14611158	14611568	411	Peak_9957	101.153	-1.20187	0.348214	0.000557412	0.0089439
chr2R	8783915	8784714	800	Peak_3561	264.997	-0.898708	0.26044	0.000559064	0.0089532
chr3R	27368308	27369228	921	Peak_11383	701.983	-0.983807	0.285109	0.000559258	0.0089532
chr3R	13904118	13904611	494	Peak_9875	143.941	-1.08155	0.313617	0.000563449	0.00901009
chr3R	276955	277352	398	Peak_8229	121.131	0.847624	0.245819	0.000564412	0.00901528
chr3L	14050023	14050363	341	Peak_6995	101.444	0.969762	0.28135	0.000567226	0.00903224
chr2L	16545580	16546132	553	Peak_1905	272.55	-0.958546	0.278102	0.00056739	0.00903224
chrX	4458180	4458524	345	Peak_12159	130.381	-1.10488	0.320508	0.000566254	0.00903224
chr3L	17942189	17942843	655	Peak_7524	188.86	1.04284	0.302651	0.000569592	0.00904311
chr2R	9880673	9882650	1978	Peak_3703	2922.83	-0.778969	0.226083	0.000569992	0.00904311
chr3R	17963000	17963500	501	Peak_10362	137.641	-1.17388	0.340658	0.000569093	0.00904311
chr2R	9842815	9843770	956	Peak_3693	756.198	-0.653153	0.18982	0.000579759	0.00918775
chr3R	22256352	22256642	291	Peak_10849	80.3229	-1.25317	0.364296	0.000581775	0.00920937
chr3R	24717244	24718713	1470	Peak_11052	1093.67	-0.440064	0.127955	0.000583433	0.00922528
chr3R	18619689	18620062	374	Peak_10435	103.646	1.06231	0.308969	0.000585514	0.00923055
chr3L	20661407	20662554	1148	Peak_7875	346.461	-0.951324	0.276697	0.000585725	0.00923055
chr3L	17490269	17490632	364	Peak_7464	110.179	-1.14475	0.332936	0.000585253	0.00923055
chr2L	11870671	11871596	926	Peak_1414	257.424	-1.03392	0.300759	0.000586636	0.00923461
chr2L	15368004	15369565	1562	Peak_1806	1240.06	-0.714955	0.207993	0.000587321	0.00923512
chr3L	19285079	19286570	1492	Peak_7721	652.808	-0.668007	0.194522	0.000594541	0.00933826
chr2L	5869715	5870149	435	Peak_697	132.512	1.22845	0.358075	0.000602009	0.00944506
chr2L	6695357	6695774	418	Peak_799	128.837	0.898007	0.261803	0.00060339	0.00944577
chr3R	12160163	12160657	495	Peak_9695	352.495	-0.634801	0.185065	0.000603245	0.00944577
chr3R	17239941	17241407	1467	Peak_10243	554.975	0.924117	0.269488	0.000605454	0.00946758
chr2L	1734173	1734548	376	Peak_253	99.1308	1.21809	0.355677	0.000615472	0.00960583
chr3R	9851449	9851992	544	Peak_9389	242.392	0.958389	0.279859	0.000615828	0.00960583
chr3L	10289522	10290186	665	Peak_6467	241.674	0.946596	0.276456	0.000616984	0.00960583
chr3L	22169519	22170485	967	Peak_8086	906.296	-0.622477	0.181813	0.000617693	0.00960583
chr3L	10324670	10325705	1036	Peak_6474	577.56	-0.998837	0.291731	0.000617455	0.00960583
chr2L	9082870	9083284	415	Peak_1107	169.525	0.792773	0.231596	0.000619142	0.0096178
chr3R	14620712	14621957	1246	Peak_9959	1208.54	-0.738323	0.215779	0.000622413	0.00965798
chr3L	13247932	13249096	1165	Peak_6931	687.471	-0.818364	0.239336	0.000627803	0.00972901
chr2L	13955684	13956360	677	Peak_1633	454.907	-1.00585	0.294188	0.000628366	0.00972901
chr2R	3042929	3043228	300	Peak_2752	96.6538	0.99202	0.290611	0.000641194	0.00991676
chr3L	3274097	3274512	416	Peak_5673	122.829	-1.04103	0.305018	0.000642521	0.00992642
chr3R	7575209	7576070	862	Peak_9136	364.371	0.605336	0.177416	0.000644972	0.00994256
chr3R	26664032	26665902	1871	Peak_11321	531.273	-0.857913	0.251435	0.000644715	0.00994256
chr2L	7913148	7913865	718	Peak_962	228.299	1.19137	0.349336	0.000648734	0.00995711
chr2L	16450897	16451430	534	Peak_1886	216.78	1.00855	0.295697	0.000647864	0.00995711
chr3L	2868492	2869753	1262	Peak_5609	1127.03	-0.550908	0.161499	0.00064672	0.00995711
chrX	14625037	14625369	333	Peak_13283	131.391	-0.89707	0.263036	0.000648561	0.00995711
chrX	5920504	5921181	678	Peak_12308	289.282	-0.851726	0.249815	0.000650992	0.00996257
chr3L	813360	814312	953	Peak_5354	377.463	-1.05144	0.308369	0.00065041	0.00996257
chrX	1085012	1085568	557	Peak_11692	224.861	-1.08889	0.319385	0.000651204	0.00996257
chr3R	3274726	3275198	473	Peak_8621	138.08	1.19281	0.349922	0.000652522	0.00997195
chr3L	13393919	13394767	849	Peak_6939	851.729	-0.631727	0.185445	0.000657904	0.0100433
chr3L	12706665	12707201	537	Peak_6862	206.576	-1.02459	0.300835	0.000659653	0.0100592
chr3L	8694446	8695753	1308	Peak_6316	909.708	-0.705305	0.207299	0.000668088	0.0101768
chr3R	12101760	12102191	432	Peak_9684	196.324	1.00168	0.294466	0.000669735	0.0101909
chrX	12630993	12632062	1070	Peak_13075	1105.76	0.67555	0.198625	0.000671071	0.0102003
chr2R	2007735	2008966	1232	Peak_2605	1078.49	-0.875251	0.257405	0.000673149	0.0102209
chr3R	5790242	5791188	947	Peak_8948	399.286	-1.12295	0.330381	0.000676421	0.0102595
chrX	12559901	12561032	1132	Peak_13059	898.581	0.728623	0.214399	0.000677707	0.0102659
chr3R	5738656	5739477	822	Peak_8940	260.458	-0.990715	0.291602	0.00068008	0.0102659
chr2L	9986141	9987568	1428	Peak_1217	618.546	-1.04998	0.308991	0.000678593	0.0102659
chr3R	23022781	23023385	605	Peak_10936	192.829	-1.11549	0.328305	0.000679485	0.0102659
chr2R	14459284	14459853	570	Peak_4299	122.894	-1.2758	0.37553	0.000680472	0.0102659
chrX	13977674	13978148	475	Peak_13241	155.381	-1.16356	0.342803	0.000688121	0.0103702
chr2L	1657936	1658544	609	Peak_237	266.242	-0.90901	0.267979	0.000693616	0.0104419
chr2L	1062121	1064207	2087	Peak_164	2306.63	-0.64989	0.191721	0.00069951	0.0105194
chr2R	7546253	7547115	863	Peak_3401	875.542	-0.811785	0.239524	0.00070107	0.0105317
chr3R	25344772	25345798	1027	Peak_11132	301.14	-1.1181	0.330128	0.000706938	0.0106086
chr3R	6447841	6448387	547	Peak_9036	177.94	-1.16493	0.344011	0.000708343	0.0106184
chr3R	6203662	6204050	389	Peak_8986	165.173	0.767896	0.226828	0.000710817	0.0106442
chr3L	9372427	9373988	1562	Peak_6391	2366.05	-0.851604	0.251585	0.000711904	0.0106492
chr3L	18131047	18131499	453	Peak_7568	152.725	-0.976703	0.288723	0.000717405	0.0107201
chrX	16144879	16145211	333	Peak_13460	113.932	1.0968	0.324332	0.00072032	0.0107523
chr2R	3646122	3646737	616	Peak_2849	265.943	0.655558	0.193893	0.000722149	0.0107682
chr2L	10321545	10321936	392	Peak_1250	134.221	1.05813	0.313301	0.000731838	0.0109012
chr2L	7619147	7619824	678	Peak_929	298.705	-0.740677	0.219422	0.000736616	0.0109609
chrX	22247677	22248265	589	Peak_14133	210.178	-0.930927	0.27587	0.000739475	0.0109918
chr3R	19765335	19766180	846	Peak_10567	396.622	0.967566	0.286932	0.00074594	0.0110763
chr3R	1920891	1921486	596	Peak_8436	300.416	-0.832595	0.247015	0.000749966	0.0111244
chrX	7116414	7116991	578	Peak_12463	353.536	-0.865446	0.256941	0.000756412	0.0112082
chr3R	14262505	14262949	445	Peak_9919	178.623	0.840497	0.249572	0.000757818	0.0112173
chr2L	529933	531133	1201	Peak_94	1073.96	-0.599614	0.178166	0.000764079	0.0112981
chr2R	10854326	10854708	383	Peak_3833	180.097	-0.763373	0.226969	0.000770062	0.0113747
chr2L	18645283	18646095	813	Peak_2064	224.441	-1.21129	0.36028	0.000773585	0.0114148
chr3R	8162477	8163080	604	Peak_9207	196.399	-1.04116	0.3098	0.000777276	0.0114573
chr3L	1473696	1474253	558	Peak_5442	133.058	-1.18489	0.352743	0.000782033	0.0115154
chrX	2812529	2813000	472	Peak_11937	207.624	0.958163	0.285325	0.000784661	0.0115301
chr3L	3342136	3343872	1737	Peak_5684	655.198	-0.575226	0.17128	0.00078396	0.0115301
chr3L	9454774	9456288	1515	Peak_6412	999.878	0.55313	0.164729	0.000785617	0.0115322
chrX	6876726	6878498	1773	Peak_12429	1078.5	-0.721735	0.214972	0.000786934	0.0115395
chrX	6863425	6864135	711	Peak_12425	361.277	-1.10051	0.327895	0.000789972	0.0115721
chr3L	13757066	13757390	325	Peak_6962	75.2509	1.25693	0.374693	0.000794906	0.0116323
chrX	19666182	19666539	358	Peak_13953	131.608	1.17521	0.350795	0.000807687	0.0117949
chr2R	13103712	13104085	374	Peak_4111	92.8931	-1.0619	0.316949	0.000807043	0.0117949
chr2R	9637403	9637994	592	Peak_3666	174.915	-1.21908	0.364479	0.000823689	0.0120162
chr3R	19968332	19970953	2622	Peak_10594	2224.33	-0.880245	0.26336	0.000830666	0.0121055
chrX	1000218	1000577	360	Peak_11681	85.9248	1.16607	0.349014	0.000834674	0.0121513
chrX	4358582	4359227	646	Peak_12141	307.259	0.889103	0.26633	0.000842765	0.0122565
chr3R	2035827	2037431	1605	Peak_8455	708.065	-0.515428	0.154506	0.00085004	0.0123496
chr2L	1408534	1410268	1735	Peak_192	1052.05	-0.751004	0.225287	0.000857491	0.0124451
chr3L	7847784	7848935	1152	Peak_6187	729.941	0.541302	0.162418	0.000859827	0.0124662
chr3L	3892917	3893551	635	Peak_5766	283.263	0.712821	0.213932	0.000862261	0.0124887
chr2R	10931059	10931900	842	Peak_3847	310.539	-1.00456	0.301555	0.0008645	0.0125083
chr2L	19071618	19072306	689	Peak_2126	211.298	0.645423	0.193798	0.000867264	0.0125354
chr2R	13823077	13824798	1722	Peak_4200	441.747	1.25888	0.378285	0.000875138	0.0125721
chr2R	14098625	14098921	297	Peak_4227	79.757	1.25788	0.377928	0.000873621	0.0125721
chrX	19191036	19191450	415	Peak_13869	199.838	0.848662	0.254992	0.000874133	0.0125721
chrX	14582385	14582935	551	Peak_13277	195.27	-0.929935	0.27943	0.000874818	0.0125721
chr3L	14973164	14973573	410	Peak_7116	154.099	-1.02589	0.308151	0.000871009	0.0125721
chrX	17439331	17439775	445	Peak_13629	127.41	-1.02822	0.308907	0.000872888	0.0125721
chr3L	18750108	18750734	627	Peak_7631	332.456	1.10284	0.331427	0.00087612	0.0125734
chrX	1082713	1083707	995	Peak_11691	288.343	-0.916816	0.275714	0.000883417	0.0126653
chr3L	14056909	14057411	503	Peak_6998	158.945	0.924354	0.278008	0.000884442	0.0126659
chr2R	5968231	5969242	1012	Peak_3158	321.891	-0.731078	0.219895	0.000885254	0.0126659
chr2L	18647905	18648469	565	Peak_2065	178.218	-1.10947	0.333797	0.000888061	0.0126933
chr2L	1431228	1431915	688	Peak_199	257.697	-0.958729	0.288542	0.000891618	0.0127312
chr3R	4618067	4619222	1156	Peak_8762	980.423	-0.669447	0.201498	0.000892613	0.0127326
chr2R	18569073	18570140	1068	Peak_4825	550.327	0.746309	0.224739	0.000897638	0.0127913
chr2L	7023222	7024656	1435	Peak_840	584.29	0.622609	0.187581	0.000902941	0.012854
chr2R	7284690	7285729	1040	Peak_3340	673.794	-0.887831	0.267777	0.000914601	0.0130068
chr3R	15137882	15138514	633	Peak_10036	573.558	-0.652629	0.196982	0.00092252	0.0130931
chr2R	11785313	11785784	472	Peak_3954	136.053	-1.05925	0.319697	0.000922037	0.0130931
chr2R	1600876	1601451	576	Peak_2560	257.502	-0.7979	0.240941	0.000927664	0.0131529
chr2R	14199119	14201039	1921	Peak_4261	2148.52	-0.774118	0.233922	0.000935283	0.0132477
chr3R	3264585	3264856	272	Peak_8619	119.841	1.01904	0.308048	0.000939504	0.0132941
chr2L	833259	833566	308	Peak_147	102.237	0.961591	0.290854	0.000946056	0.0133735
chr3L	18218529	18218846	318	Peak_7595	87.9345	1.20054	0.363275	0.000950537	0.0134234
chr3L	6464972	6465885	914	Peak_6046	416.284	-0.946748	0.286582	0.000954566	0.0134668
chr3R	11868113	11868841	729	Peak_9623	460.172	-0.726432	0.220029	0.000961599	0.0135445
chr3R	6325294	6326004	711	Peak_9006	219.261	-1.02881	0.311626	0.000961991	0.0135445
chr3L	12699270	12700353	1084	Peak_6861	400.916	-0.76623	0.232124	0.000963587	0.0135535
chr3L	8813623	8816475	2853	Peak_6335	3423.92	-0.554035	0.167885	0.000966567	0.0135684
chr3L	2823062	2825362	2301	Peak_5597	3372.26	-0.656101	0.198809	0.000966338	0.0135684
chrX	15056384	15057598	1215	Peak_13337	1121.17	-0.516622	0.156586	0.000969328	0.0135937
chr3L	6432798	6433589	792	Peak_6040	260.442	-1.05803	0.320753	0.000971775	0.0136145
chr2L	11154857	11156029	1173	Peak_1344	847.928	-0.675459	0.20481	0.000973811	0.0136295
chr3R	12222071	12222547	477	Peak_9706	174.727	0.886426	0.268967	0.000981869	0.0137045
chr3R	16890622	16891200	579	Peak_10188	361.718	0.652422	0.197952	0.00098121	0.0137045
chr3L	17482103	17482505	403	Peak_7459	122.747	-1.05858	0.32121	0.000982075	0.0137045
chr3R	9746720	9748418	1699	Peak_9364	1566.95	-0.734572	0.22303	0.000989124	0.0137892
chr2L	19145879	19147138	1260	Peak_2140	585.527	0.824236	0.250434	0.000997511	0.0138924
chr2R	16926554	16927561	1008	Peak_4600	365.421	-0.774957	0.235797	0.00101427	0.0141119
chrX	13852697	13852981	285	Peak_13222	130.076	1.10378	0.335973	0.0010187	0.0141596
chr3L	2161758	2162336	579	Peak_5531	199.906	-0.856975	0.261341	0.00104121	0.0144583
chrX	3666633	3667905	1273	Peak_12063	861.722	0.604055	0.184318	0.00104826	0.014542
chr3R	14306003	14307755	1753	Peak_9933	1150.5	0.859587	0.262374	0.00105216	0.0145818
chr3R	6299197	6300598	1402	Peak_9001	981.237	-0.658941	0.201166	0.00105431	0.0145972
chr3L	2117553	2118326	774	Peak_5521	253.966	-1.02525	0.313035	0.0010559	0.0146049
chrX	4914972	4915827	856	Peak_12202	320.016	1.04171	0.318118	0.00105808	0.01462
chr3R	22055515	22056296	782	Peak_10841	596.446	-0.653538	0.199593	0.00105906	0.01462
chrX	20110384	20111642	1259	Peak_13988	1409.15	-0.674432	0.206016	0.00106156	0.0146402
chr2R	4545267	4545998	732	Peak_2961	252.135	0.905418	0.276826	0.00107277	0.0147604
chr2R	6987859	6988526	668	Peak_3298	479.103	0.671838	0.205421	0.00107341	0.0147604
chr3R	23042838	23044110	1273	Peak_10944	1792.69	-0.657928	0.201167	0.00107335	0.0147604
chrX	4388774	4389278	505	Peak_12150	257.649	1.02237	0.31264	0.00107505	0.0147686
chrX	14011416	14011903	488	Peak_13244	146.079	0.851632	0.260493	0.0010781	0.0147962
chrX	9776815	9777496	682	Peak_12771	418.539	-0.752799	0.230284	0.00107925	0.0147975
chr2R	18065717	18067502	1786	Peak_4748	2695.91	-0.653293	0.200038	0.00109136	0.0149491
chr3R	12048906	12049566	661	Peak_9661	382.675	0.994828	0.304739	0.00109646	0.0149674
chrX	12117034	12117555	522	Peak_13022	318.993	-0.697225	0.213541	0.00109437	0.0149674
chr2R	4186160	4187056	897	Peak_2917	315.493	-0.731843	0.224189	0.00109693	0.0149674
chrX	13458971	13459318	348	Peak_13175	120.671	-0.996329	0.305208	0.00109684	0.0149674
chrX	7409417	7409803	387	Peak_12483	114.973	1.16619	0.357811	0.00111709	0.0152277
chr2R	9458415	9458715	301	Peak_3655	121.446	0.902468	0.276939	0.00111913	0.0152409
chr2R	6981485	6981873	389	Peak_3296	121.498	-1.00966	0.309953	0.00112418	0.0152949
chr2R	2391862	2393414	1553	Peak_2649	442.157	-0.668649	0.205321	0.00112753	0.0153258
chr3R	14938089	14938554	466	Peak_9996	122.565	-1.26104	0.387368	0.00113229	0.0153756
chrX	3034768	3035220	453	Peak_11980	303.702	0.882005	0.271002	0.00113552	0.0154047
chr3L	18019728	18020016	289	Peak_7551	73.9667	1.19825	0.368367	0.00114241	0.0154833
chrX	18448560	18449361	802	Peak_13764	221.921	-0.944994	0.290544	0.00114397	0.0154896
chr3L	16009203	16010149	947	Peak_7245	1114.16	-0.731087	0.224905	0.00115144	0.0155739
chr2L	18458642	18459109	468	Peak_2032	165.88	-1.11103	0.341813	0.00115239	0.0155739
chr2R	3128365	3129203	839	Peak_2758	346.366	-0.740178	0.227765	0.00115512	0.0155957
chr2L	14479782	14480184	403	Peak_1696	188.818	-0.712251	0.219223	0.00115818	0.0156116
chr3R	786836	788037	1202	Peak_8282	373.629	-0.974858	0.300057	0.0011585	0.0156116
chr3R	20374543	20374931	389	Peak_10637	113.475	1.07382	0.3306	0.00116175	0.0156404
chr3R	18215737	18216476	740	Peak_10393	443.281	0.728971	0.224468	0.00116402	0.0156561
chrX	9915789	9916138	350	Peak_12785	140.843	-0.848164	0.261233	0.00116722	0.0156843
chr2R	13679949	13680517	569	Peak_4177	335.203	0.727675	0.224206	0.00117216	0.0157356
chr3R	24362109	24363416	1308	Peak_11019	1861.75	-0.569145	0.175446	0.00117869	0.0157862
chr3R	12884754	12885861	1108	Peak_9794	565.92	-0.570399	0.175834	0.00117877	0.0157862
chrX	13992039	13993068	1030	Peak_13242	316.809	-0.868948	0.267876	0.00117927	0.0157862
chr2L	8086731	8087165	435	Peak_990	158.902	0.933138	0.287877	0.00118926	0.0158748
chr3R	10254405	10255022	618	Peak_9441	268.202	-0.878015	0.270834	0.00118737	0.0158748
chr3R	9674384	9675833	1450	Peak_9349	507.646	-0.889151	0.274292	0.00118849	0.0158748
chr2R	7794341	7794603	263	Peak_3438	63.9767	1.14818	0.354414	0.00119674	0.0159467
chrX	13931723	13932623	901	Peak_13236	741.292	-0.696766	0.215077	0.00119691	0.0159467
chrX	13433889	13436676	2788	Peak_13172	1516.45	-0.763581	0.235888	0.00120771	0.0160603
chr2L	14261014	14261511	498	Peak_1654	171.624	-1.0628	0.328307	0.00120702	0.0160603
chr2L	9136705	9137266	562	Peak_1112	505.789	-0.834207	0.257775	0.0012114	0.0160793
chr3L	19046199	19046573	375	Peak_7683	128.764	-1.02529	0.316802	0.0012106	0.0160793
chr2L	7324784	7325243	460	Peak_887	105.988	1.1701	0.361688	0.00121592	0.0161241
chr2R	4542092	4542392	301	Peak_2959	111.516	1.00886	0.312049	0.00122491	0.0162196
chr2R	5324872	5325353	482	Peak_3072	163.935	0.826223	0.255567	0.00122542	0.0162196
chr3R	19337219	19338196	978	Peak_10513	414.923	-0.910223	0.281698	0.00123269	0.0163006
chr3R	13933050	13933487	438	Peak_9877	116.802	-1.03268	0.319763	0.00124001	0.016382
chr2R	17262371	17263476	1106	Peak_4645	326.837	0.67723	0.209956	0.00125715	0.016593
chr2L	722946	724272	1327	Peak_141	807.433	-0.819189	0.25407	0.00126295	0.016654
chrX	839864	840280	417	Peak_11660	119.911	1.05988	0.328906	0.00127103	0.0167411
chrX	10834574	10835092	519	Peak_12893	200.563	-0.956797	0.296935	0.00127193	0.0167411
chr3R	20688078	20688801	724	Peak_10676	226.433	0.830252	0.257731	0.00127568	0.016775
chr3R	11919519	11920629	1111	Peak_9628	570.329	-0.757865	0.235366	0.00128219	0.0168408
chr3R	10238828	10240092	1265	Peak_9435	519.133	-0.935068	0.290417	0.00128307	0.0168408
chr2L	14451629	14452408	780	Peak_1687	346.542	-0.788815	0.245018	0.00128451	0.016844
chr2R	10320570	10321369	800	Peak_3775	666.246	-0.70596	0.219313	0.00128658	0.0168556
chr2R	3913017	3914179	1163	Peak_2881	391.639	-0.915505	0.284482	0.00129023	0.0168877
chr2L	18945681	18948774	3094	Peak_2110	3277.29	-0.520423	0.161797	0.00129755	0.0169521
chr3L	6355900	6357638	1739	Peak_6026	649.44	-0.775344	0.24105	0.0012975	0.0169521
chr2L	2164437	2165446	1010	Peak_288	1068.95	-0.686746	0.213546	0.00130029	0.016963
chr2R	9816528	9816946	419	Peak_3686	121.35	-1.1297	0.351295	0.00130078	0.016963
chr2L	1470314	1471381	1068	Peak_211	351.508	-0.813813	0.253142	0.00130513	0.0169902
chrX	5867273	5868721	1449	Peak_12285	509.409	-1.03257	0.32119	0.00130528	0.0169902
chr2R	15973714	15974120	407	Peak_4489	132.34	-1.05192	0.327344	0.00131134	0.0170534
chr3L	20118982	20119570	589	Peak_7800	354.334	-0.800553	0.2492	0.00131592	0.0170973
chrX	21249241	21249931	691	Peak_14070	397.508	-0.727549	0.226564	0.00132168	0.0171563
chrX	8411908	8413159	1252	Peak_12609	1128.33	0.729639	0.227418	0.00133497	0.0173129
chr3L	2873026	2873514	489	Peak_5610	139.871	-1.00473	0.313264	0.00133987	0.0173606
chr3R	24894306	24895684	1379	Peak_11066	1046.5	0.688443	0.214717	0.00134461	0.017406
chr3R	7951186	7951706	521	Peak_9189	178.156	-0.836773	0.261112	0.00135228	0.0174729
chr2R	2418326	2419014	689	Peak_2660	587.834	-0.972547	0.303456	0.00135107	0.0174729
chr3L	4701138	4701474	337	Peak_5877	67.8347	-1.20988	0.377571	0.00135348	0.0174729
chrX	1869961	1870583	623	Peak_11801	253.568	-0.840829	0.262448	0.00135632	0.0174887
chr3R	20791398	20791791	394	Peak_10686	125.182	-1.18176	0.368886	0.00135718	0.0174887
chr2L	1074111	1074565	455	Peak_169	152.939	0.792248	0.247388	0.00136262	0.0175428
chr3L	8020144	8020963	820	Peak_6214	368.02	-0.660141	0.206225	0.00136915	0.0176008
chrX	333437	334140	704	Peak_11601	234.391	-0.884918	0.276452	0.00136962	0.0176008
chr2R	15873527	15874603	1077	Peak_4475	348.738	0.844334	0.264101	0.00138861	0.0178287
chr2L	8868187	8868656	470	Peak_1090	230.42	-0.790315	0.247235	0.00139052	0.0178371
chr3L	12487932	12488990	1059	Peak_6806	591.891	-0.893921	0.279764	0.00139699	0.0179037
chr3L	20983693	20984255	563	Peak_7920	270.578	-0.786899	0.246492	0.00141098	0.0180667
chrX	18804460	18804865	406	Peak_13813	125.913	1.11267	0.348688	0.00141777	0.0181373
chr3R	20795958	20796542	585	Peak_10689	270.776	-1.06566	0.334041	0.00142178	0.0181721
chr3L	1007617	1008377	761	Peak_5375	296.703	0.649077	0.203574	0.00143061	0.0182683
chr2L	19789299	19789739	441	Peak_2213	121.37	0.960193	0.301263	0.00143645	0.0183099
chr2L	6502922	6503251	330	Peak_769	137.494	0.957475	0.300394	0.00143557	0.0183099
chr2R	15840249	15840789	541	Peak_4467	166.632	-0.882738	0.277026	0.00144014	0.0183404
chr3L	11063390	11064133	744	Peak_6610	421.77	0.683132	0.214468	0.00144632	0.0184024
chr3R	5703859	5704112	254	Peak_8932	123.065	1.02954	0.323311	0.00145071	0.018404
chr3L	6367665	6368208	544	Peak_6031	198.705	0.982153	0.308448	0.00145165	0.018404
chr3R	17965032	17965954	923	Peak_10363	333.858	-0.637791	0.200298	0.00145149	0.018404
chr3R	6276791	6277350	560	Peak_8995	125.287	-1.13438	0.356203	0.00144926	0.018404
chr3R	9369812	9370492	681	Peak_9311	204.512	-0.681583	0.214145	0.00145851	0.0184521
chr3R	11908736	11909156	421	Peak_9627	130.801	-0.834297	0.262139	0.00145935	0.0184521
chrX	14804703	14805108	406	Peak_13305	141.106	-0.898013	0.282157	0.00145923	0.0184521
chrX	11049892	11050507	616	Peak_12910	239.736	0.734695	0.230957	0.00146724	0.0185064
chr2L	20352261	20353111	851	Peak_2273	351.251	-0.742915	0.233512	0.00146521	0.0185064
chr3L	12021544	12022136	593	Peak_6737	227.251	-0.937518	0.294722	0.00146758	0.0185064
chr2L	6551976	6553065	1090	Peak_779	534.976	-0.835783	0.262785	0.00147032	0.0185245
chrX	1135930	1136912	983	Peak_11701	307.618	1.03168	0.324583	0.00148058	0.018604
chr2L	12600654	12601094	441	Peak_1491	114.324	1.01695	0.319928	0.00147951	0.018604
chr3L	20977232	20978201	970	Peak_7917	695.324	-0.871567	0.274193	0.00147954	0.018604
chrX	6199392	6200087	696	Peak_12337	302.101	-0.939909	0.295737	0.00148198	0.018605
chr3R	27868937	27869180	244	Peak_11457	90.5978	0.982942	0.30931	0.00148369	0.01861
chrX	16827168	16827572	405	Peak_13559	147.047	-1.08791	0.342399	0.00148642	0.0186277
chrX	7073064	7074233	1170	Peak_12453	336.801	-0.817928	0.257507	0.0014915	0.0186583
chr3L	5610358	5611043	686	Peak_5932	212.196	-1.2478	0.392823	0.00149069	0.0186583
chr3R	12850076	12850894	819	Peak_9788	203.222	-0.928637	0.292404	0.00149391	0.0186702
chr2L	14674854	14675254	401	Peak_1754	119.826	-1.00123	0.315285	0.00149509	0.0186702
chr3R	2817273	2819148	1876	Peak_8554	1051.33	0.775306	0.244483	0.00151808	0.0189405
chr2L	2165705	2167345	1641	Peak_289	818.924	0.905498	0.285662	0.00152531	0.019014
chr3L	70553	71840	1288	Peak_5192	947.226	0.650334	0.205235	0.00153109	0.0190691
chr3L	3411075	3411408	334	Peak_5697	104.328	0.922565	0.291239	0.00153636	0.0190843
chrX	18845005	18845592	588	Peak_13827	250.688	0.707969	0.223487	0.0015358	0.0190843
chr3R	21458812	21460485	1674	Peak_10765	781.257	-0.755655	0.238533	0.0015353	0.0190843
chr3R	12142318	12143061	744	Peak_9692	1345.09	-0.556234	0.175688	0.00154531	0.0191786
chrX	2431537	2431828	292	Peak_11898	99.3536	1.02077	0.322445	0.00154697	0.0191825
chr3R	2935384	2936184	801	Peak_8575	410.785	-0.674575	0.213108	0.00154858	0.0191856
chrX	15019456	15019903	448	Peak_13330	165.797	0.756389	0.239	0.00155188	0.0192096
chrX	1533882	1534539	658	Peak_11758	260.802	-0.825415	0.261078	0.00156927	0.0194079
chr2L	14850353	14850888	536	Peak_1765	111.265	0.93466	0.295882	0.00158368	0.019569
chr2L	11500554	11501039	486	Peak_1399	250.677	-0.734729	0.232736	0.00159447	0.019685
chrX	13135283	13135755	473	Peak_13122	257.795	-0.673334	0.213307	0.001596	0.0196868
chrX	8954526	8955397	872	Peak_12673	339.346	0.740265	0.234664	0.0016073	0.01974
chr3L	21800985	21802190	1206	Peak_8044	2164.17	-0.564367	0.178877	0.00160464	0.01974
chr3L	1095326	1097431	2106	Peak_5383	861.43	-0.697829	0.22114	0.00160172	0.01974
chr3L	11709793	11710417	625	Peak_6718	424.986	-0.739027	0.234231	0.00160433	0.01974
chr3L	11014851	11015427	577	Peak_6603	181.43	-0.96772	0.306752	0.00160646	0.01974
chr2R	6763044	6763484	441	Peak_3266	156.437	0.690949	0.21908	0.00161122	0.019771
chr2R	18928798	18929565	768	Peak_4868	220.861	-1.02887	0.326286	0.00161451	0.0197943
chrX	9390961	9391656	696	Peak_12730	890.398	0.830883	0.26356	0.00161856	0.0198267
chr3L	10926593	10928836	2244	Peak_6578	972.377	-0.59416	0.188498	0.00162116	0.0198413
chrX	5890906	5891339	434	Peak_12291	138.272	-0.796216	0.252675	0.00162628	0.0198868
chr3R	9230323	9231517	1195	Peak_9300	350.369	0.808264	0.256552	0.00162995	0.0198905
chr3R	27536921	27537915	995	Peak_11417	348.906	0.752802	0.238959	0.00163081	0.0198905
chr3R	21249466	21249735	270	Peak_10739	133.479	-0.775207	0.246032	0.00162802	0.0198905
chr3L	22704740	22705626	887	Peak_8139	229.711	0.977004	0.310192	0.00163453	0.0199078
chr3L	11274820	11275349	530	Peak_6643	294.811	0.899873	0.285712	0.00163504	0.0199078
chr2R	6662660	6663083	424	Peak_3249	117.125	-0.89247	0.283423	0.00163886	0.0199371
chr2R	8844767	8845820	1054	Peak_3576	668.022	0.486979	0.15467	0.00164107	0.0199439
chr3L	6932111	6932496	386	Peak_6092	154.757	-0.948288	0.301206	0.00164224	0.0199439
chrX	8670666	8671433	768	Peak_12642	182.574	1.04119	0.330863	0.00165012	0.0200145
chr2R	2970609	2971712	1104	Peak_2736	377.8	-0.774249	0.246046	0.00165088	0.0200145
chr2L	7324124	7324664	541	Peak_886	157.216	1.04181	0.331131	0.00165394	0.0200344
chr3L	20223397	20223943	547	Peak_7813	398.797	0.871565	0.277101	0.00165922	0.0200811
chr3L	17988405	17988855	451	Peak_7538	137.032	0.96758	0.307801	0.00166928	0.020167
chr2R	2902358	2903608	1251	Peak_2728	403.675	0.606511	0.192969	0.00167203	0.020167
chr3R	11849098	11850275	1178	Peak_9617	588.468	-0.898712	0.285871	0.00166785	0.020167
chr3L	7106023	7106788	766	Peak_6113	180.568	-0.948223	0.301678	0.00167131	0.020167
chrX	22032068	22032560	493	Peak_14119	158.694	-0.950934	0.302614	0.00167569	0.020194
chr2R	14151888	14152492	605	Peak_4246	320.403	-0.930314	0.296145	0.00168137	0.0202451
chrX	15514442	15515062	621	Peak_13374	160.284	0.969692	0.30902	0.00170126	0.0204434
chr3R	13930029	13930570	542	Peak_9876	187.237	-0.722726	0.230347	0.00170362	0.0204434
chr2L	3805472	3806051	580	Peak_483	223.284	-0.852904	0.271778	0.00169969	0.0204434
chr2L	13095762	13096095	334	Peak_1540	124.398	-0.958156	0.305374	0.00170311	0.0204434
chr2L	8171548	8172009	462	Peak_1000	132.775	0.848859	0.270616	0.0017082	0.0204811
chr3L	7971758	7972673	916	Peak_6204	629.235	0.62897	0.200587	0.00171479	0.0205426
chr3L	7828218	7828642	425	Peak_6185	158.116	0.867884	0.276966	0.00172712	0.0206728
chr3L	17965365	17966620	1256	Peak_7531	1110.59	-0.858679	0.274163	0.00173621	0.020764
chr2R	7501442	7502250	809	Peak_3387	751.662	0.61945	0.197818	0.00173967	0.0207702
chr2L	7358775	7359567	793	Peak_897	233.877	-1.0243	0.32708	0.0017383	0.0207702
chr3R	22874243	22874931	689	Peak_10914	259.597	-0.863898	0.276081	0.00175313	0.0209133
chrX	20045304	20045628	325	Peak_13978	98.7298	-0.950613	0.303883	0.00175871	0.0209622
chr3R	25583694	25584103	410	Peak_11169	133.236	-0.802682	0.256675	0.00176465	0.0210153
chr3R	18967459	18968443	985	Peak_10455	1151.9	-0.58489	0.187215	0.00178313	0.0211996
chrX	1864352	1865164	813	Peak_11799	385.438	-0.769368	0.246262	0.00178297	0.0211996
chr2R	15909826	15911008	1183	Peak_4479	588.947	-0.762078	0.243955	0.00178501	0.0212041
chr2R	17745594	17746288	695	Peak_4721	216.023	-0.962379	0.308173	0.00179108	0.0212583
chrX	2035229	2036218	990	Peak_11835	575.693	0.543832	0.174227	0.00179998	0.0213461
chrX	15391610	15392351	742	Peak_13357	169.719	0.903656	0.289531	0.00180171	0.0213487
chr3R	9105204	9105721	518	Peak_9282	161.486	0.888425	0.284842	0.00181459	0.0214833
chr2L	18481761	18482234	474	Peak_2041	158.878	-1.06125	0.340344	0.00181975	0.0215263
chrX	11271956	11272522	567	Peak_12922	268.307	1.03651	0.332479	0.00182372	0.0215268
chr2L	17743031	17743316	286	Peak_1986	133.965	0.929004	0.297988	0.00182336	0.0215268
chr3R	15139523	15140620	1098	Peak_10037	711.401	-0.559244	0.179393	0.00182435	0.0215268
chr2L	14495616	14496023	408	Peak_1699	223.569	0.654196	0.209926	0.00183123	0.0215756
chr3L	7986710	7987607	898	Peak_6210	768.214	-0.723521	0.232175	0.00183154	0.0215756
chr2L	15379814	15380288	475	Peak_1809	140.355	-0.851828	0.273444	0.00183828	0.0216369
chr2R	7846709	7847563	855	Peak_3448	329.755	-0.98014	0.314672	0.00184073	0.0216477
chr2R	15851308	15852064	757	Peak_4470	188.718	-1.13059	0.363011	0.00184276	0.0216536
chrX	2884972	2885474	503	Peak_11953	271.147	-0.633861	0.203741	0.0018638	0.0218826
chr2R	20732162	20732727	566	Peak_5128	361.327	-0.916347	0.294651	0.00187126	0.021952
chr3R	19140857	19141353	497	Peak_10482	225.68	0.675708	0.217366	0.00187961	0.0219989
chr2L	16806903	16807704	802	Peak_1938	1005.89	-0.5854	0.188318	0.00187993	0.0219989
chr2R	8272299	8273398	1100	Peak_3498	394.866	-0.736743	0.236991	0.0018789	0.0219989
chrX	11455525	11456083	559	Peak_12948	159.945	0.842613	0.271093	0.00188228	0.0220081
chrX	17806153	17806897	745	Peak_13699	373.986	-0.703852	0.226469	0.00188398	0.0220099
chr3R	6482184	6483034	851	Peak_9042	384.314	0.923586	0.297287	0.00189181	0.0220648
chr2L	13884242	13884678	437	Peak_1625	139.393	-1.18236	0.380557	0.00189052	0.0220648
chr3R	19144582	19145028	447	Peak_10483	117.471	-0.986736	0.317801	0.00190354	0.0221834
chr3R	17218612	17219087	476	Peak_10241	238.891	-0.860976	0.277321	0.00190523	0.0221848
chr2L	6527970	6528463	494	Peak_773	228.189	-0.770975	0.248471	0.00191652	0.0222978
chr3R	27073566	27074298	733	Peak_11350	501.678	-0.662724	0.213636	0.00192143	0.0223366
chr3L	1829327	1829754	428	Peak_5490	143.909	-0.868233	0.28003	0.00193197	0.0224407
chr2R	7496778	7497289	512	Peak_3386	203.231	-0.922363	0.297589	0.00193875	0.0224825
chr2L	16846974	16847368	395	Peak_1944	135.472	-0.982509	0.316993	0.00193867	0.0224825
chrX	3671127	3671698	572	Peak_12065	409.753	0.600863	0.193882	0.00194102	0.0224903
chr3L	21006591	21007117	527	Peak_7924	366.4	-0.592188	0.191128	0.00194584	0.0225243
chr2L	1059695	1060031	337	Peak_163	119.126	-0.803531	0.259356	0.00194714	0.0225243
chr2L	19546754	19547537	784	Peak_2198	290.854	0.553695	0.178817	0.00195859	0.0226198
chr2R	14222213	14223483	1271	Peak_4264	999.875	-1.13465	0.366414	0.00195729	0.0226198
chr2L	19143658	19144612	955	Peak_2139	878.247	0.746597	0.241214	0.00196706	0.0226446
chr3L	4382681	4384754	2074	Peak_5841	1808.19	-0.503016	0.16253	0.00196875	0.0226446
chr2R	19968810	19970206	1397	Peak_5019	784.433	-0.59513	0.192255	0.00196462	0.0226446
chr3R	6411399	6413797	2399	Peak_9027	1519.45	-0.660706	0.213477	0.00196834	0.0226446
chr3R	878734	879447	714	Peak_8310	364.318	-0.718309	0.232031	0.00196319	0.0226446
chrX	9026302	9027117	816	Peak_12691	410.713	1.00974	0.326296	0.00197106	0.0226528
chrX	4507485	4507894	410	Peak_12167	160.281	0.885217	0.286296	0.00198834	0.0228328
chr3L	20906114	20906403	290	Peak_7901	108.028	0.975125	0.315612	0.00200407	0.0229574
chr3R	20095687	20096277	591	Peak_10617	249.462	0.735908	0.238185	0.00200394	0.0229574
chr2L	7554401	7555144	744	Peak_923	229.707	-0.981819	0.317755	0.00200249	0.0229574
chr3R	2791142	2791532	391	Peak_8548	173.066	0.804117	0.26032	0.00200864	0.0229912
chr2L	4801546	4802301	756	Peak_571	455.587	0.925507	0.299693	0.00201381	0.0230317
chr2R	4039624	4039918	295	Peak_2900	125.239	0.882847	0.285969	0.00202041	0.0230725
chr2L	21863399	21864026	628	Peak_2454	446.184	-0.572431	0.185422	0.00202064	0.0230725
chr2R	15856709	15857759	1051	Peak_4473	559.931	-0.798343	0.258633	0.0020234	0.0230854
chr2L	512572	513338	767	Peak_87	289.334	0.837079	0.271246	0.00202832	0.0231228
chr3L	5121624	5122105	482	Peak_5894	97.5914	-1.0928	0.354173	0.00203217	0.0231481
chr3R	15094418	15094922	505	Peak_10022	267.373	0.848082	0.27489	0.00203435	0.0231543
chr2R	2491379	2492111	733	Peak_2679	195.202	-0.80291	0.260301	0.00203865	0.0231845
chr2L	10794113	10794615	503	Peak_1300	160.515	-0.931782	0.302111	0.00204073	0.0231895
chr3R	15172076	15172639	564	Peak_10046	274.267	-0.735328	0.238489	0.00204737	0.0231997
chr3R	11405016	11405520	505	Peak_9579	154.807	-0.85994	0.278876	0.00204516	0.0231997
chr2R	18917145	18917609	465	Peak_4864	150.767	-1.06392	0.345022	0.00204497	0.0231997
chr2R	19111825	19112649	825	Peak_4891	152.048	-1.09237	0.354303	0.00204819	0.0231997
chrX	18101909	18102600	692	Peak_13713	225.827	-0.966487	0.313536	0.0020524	0.0232287
chr3L	19014490	19015485	996	Peak_7676	1136.23	-0.801271	0.259965	0.0020546	0.023235
chr2R	2020315	2021183	869	Peak_2609	326.981	0.79296	0.257297	0.00205691	0.0232426
chr3R	17453280	17454110	831	Peak_10283	337.997	0.841433	0.273146	0.00206641	0.0233313
chr3R	2696591	2696884	294	Peak_8529	103.315	0.96918	0.314664	0.00206968	0.0233496
chr3L	8645468	8646267	800	Peak_6300	1221.91	-0.737501	0.239556	0.00207964	0.0234271
chr3L	15765764	15766175	412	Peak_7223	113.17	-0.821439	0.266823	0.00207987	0.0234271
chr3L	685129	685890	762	Peak_5313	342.052	0.660563	0.214747	0.00209788	0.0236112
chrX	12392968	12393367	400	Peak_13036	134.298	-0.827591	0.269105	0.00210256	0.023645
chrX	10007307	10008829	1523	Peak_12794	1176.86	-0.820976	0.267144	0.00211803	0.0238001
chr3R	6375613	6377711	2099	Peak_9020	899.57	-0.72083	0.23463	0.00212486	0.0238579
chr3L	7732547	7732773	227	Peak_6173	63.7082	1.1167	0.363848	0.00214685	0.02407
chr3L	15746409	15747324	916	Peak_7220	255.601	-0.862937	0.281171	0.00214716	0.02407
chr3R	6469590	6470252	663	Peak_9041	326.249	-0.782002	0.254851	0.00215157	0.0241003
chr2L	22179599	22180092	494	Peak_2489	198.795	0.694492	0.226458	0.00216395	0.0242017
chr2R	13349015	13350807	1793	Peak_4133	2121.18	-0.576548	0.188	0.00216405	0.0242017
chr2R	17790803	17792599	1797	Peak_4728	703.067	-0.657778	0.214519	0.00216732	0.0242191
chr2L	16803849	16804385	537	Peak_1937	213.47	-0.687506	0.224276	0.0021734	0.0242679
chr3R	4035687	4036171	485	Peak_8696	134.59	0.959556	0.31307	0.00217678	0.0242865
chr3L	626308	627395	1088	Peak_5293	814.47	0.58966	0.192508	0.00219104	0.024407
chr2L	9210760	9211905	1146	Peak_1129	628.874	-0.840156	0.274283	0.00219059	0.024407
chr3R	10383616	10384246	631	Peak_9458	214.804	0.841831	0.274937	0.00219937	0.0244229
chr2R	12273671	12275120	1450	Peak_4024	1554.12	-0.529706	0.172988	0.00219792	0.0244229
chr2L	4211006	4212492	1487	Peak_512	956.15	-0.599208	0.195683	0.00219761	0.0244229
chr2R	12194009	12194713	705	Peak_4015	233.371	-0.747185	0.243989	0.00219591	0.0244229
chrX	16861405	16862219	815	Peak_13564	624.446	-0.414846	0.135519	0.00220477	0.0244276
chr3L	14195265	14195881	617	Peak_7015	662.113	-0.559787	0.182855	0.00220329	0.0244276
chr3L	6846061	6846493	433	Peak_6084	137.416	-0.78578	0.256695	0.00220498	0.0244276
chr2L	5238529	5239003	475	Peak_632	271.865	-0.881406	0.288023	0.00221196	0.0244857
chrX	3760220	3760677	458	Peak_12083	158.61	1.02371	0.334681	0.00222264	0.0245847
chr3L	17951206	17951672	467	Peak_7525	141.43	1.04606	0.342043	0.00222611	0.0246039
chr3R	15529131	15529600	470	Peak_10073	184.119	0.931311	0.304636	0.00223471	0.0246673
chr2R	14285495	14286269	775	Peak_4275	249.609	0.673352	0.220263	0.00223534	0.0246673
chr2L	16612613	16613445	833	Peak_1914	343.701	0.850965	0.278599	0.0022548	0.0248626
chrX	6870459	6871071	613	Peak_12427	235.805	0.881846	0.288772	0.00225975	0.0248784
chr3R	9800521	9800930	410	Peak_9373	220.287	-0.860844	0.281892	0.00225957	0.0248784
chr3R	11942700	11943932	1233	Peak_9635	295.902	-0.889171	0.291639	0.00229699	0.0252491
chrX	22231723	22232333	611	Peak_14129	183.726	-0.994178	0.326069	0.00229617	0.0252491
chr3R	24672578	24673647	1070	Peak_11043	307.495	-0.762522	0.250193	0.00230572	0.0253253
chr3L	17658256	17659000	745	Peak_7500	502.686	-0.698322	0.229182	0.00231128	0.0253585
chr2L	6537727	6538242	516	Peak_776	232.846	-0.824102	0.270475	0.00231233	0.0253585
chr3R	7602798	7606828	4031	Peak_9145	4256.94	-0.540202	0.177419	0.00232844	0.0255154
chrX	10680706	10681131	426	Peak_12866	198.434	0.69753	0.229127	0.00233226	0.0255375
chr2L	4812214	4813358	1145	Peak_574	374.684	0.741024	0.243504	0.00234104	0.0255758
chr3R	17162041	17163618	1578	Peak_10227	1462.53	-0.574648	0.188837	0.00234158	0.0255758
chr3R	9831709	9833449	1741	Peak_9383	1076.19	-0.60092	0.197482	0.002343	0.0255758
chr2R	19674901	19675504	604	Peak_4962	317.846	-0.640458	0.210432	0.00233807	0.0255758
chr3R	5909740	5910430	691	Peak_8958	800.22	0.688529	0.2263	0.00234586	0.0255872
chr3R	17417690	17418017	328	Peak_10267	164.429	0.828053	0.272191	0.00234876	0.0255991
chr2L	11504719	11505431	713	Peak_1400	348.973	-0.639558	0.21026	0.00235212	0.0256159
chrX	17205000	17205359	360	Peak_13599	116.552	1.03908	0.341635	0.00235408	0.0256176
chrX	15864127	15864633	507	Peak_13422	148.998	0.900757	0.296208	0.00235822	0.0256429
chr2L	21883350	21883967	618	Peak_2461	190.457	0.722292	0.237723	0.00237852	0.0258041
chr2R	20193046	20194255	1210	Peak_5047	1077.4	-0.688294	0.226504	0.00237548	0.0258041
chr2R	15510477	15510882	406	Peak_4426	114.977	-1.06548	0.350654	0.00237714	0.0258041
chrX	6594103	6594954	852	Peak_12385	438.99	0.782608	0.257644	0.00238504	0.0258551
chrX	21389497	21390240	744	Peak_14073	287.393	-0.787779	0.25949	0.00239841	0.02598
chr3L	17557494	17558231	738	Peak_7471	396.054	-0.68194	0.224791	0.00241605	0.026151
chr3R	21895167	21895612	446	Peak_10823	150.802	-0.775644	0.255707	0.00241866	0.0261593
chr2L	8012420	8012968	549	Peak_981	238.594	0.929087	0.306336	0.00242216	0.0261771
chr3L	12433449	12434166	718	Peak_6793	223.031	-0.789879	0.260468	0.00242505	0.0261883
chr3L	7780835	7781509	675	Peak_6178	463.394	-0.780485	0.257405	0.00242842	0.0262046
chr3L	10988010	10988529	520	Peak_6596	225.317	-0.740834	0.244515	0.00244712	0.0263863
chr2R	17456802	17458137	1336	Peak_4673	554.791	-0.714025	0.235785	0.00245946	0.0264992
chrX	81680	82095	416	Peak_11572	239.621	0.802755	0.26527	0.00247663	0.0266638
chr2R	10769436	10769763	328	Peak_3821	122.44	0.819888	0.271029	0.00248556	0.0267372
chr2R	9351123	9352270	1148	Peak_3633	1332.53	-0.530557	0.175424	0.00249101	0.0267372
chr3R	1211355	1211901	547	Peak_8366	198.376	-0.622367	0.20576	0.00248856	0.0267372
chr3L	6212543	6213014	472	Peak_6002	221.604	-0.875706	0.28953	0.00248985	0.0267372
chrX	12340308	12341232	925	Peak_13030	197.057	-0.871922	0.288491	0.00250815	0.0269008
chr3L	21948027	21948411	385	Peak_8065	172.859	0.841421	0.278648	0.00253061	0.0269584
chrX	1163533	1165456	1924	Peak_11709	630.119	0.722054	0.23911	0.00252984	0.0269584
chrX	13127442	13128817	1376	Peak_13118	1187.07	0.68259	0.225942	0.00251868	0.0269584
chr3R	11299811	11302489	2679	Peak_9570	1669.8	0.465682	0.15423	0.0025328	0.0269584
chr3R	1931567	1932332	766	Peak_8440	390.663	-0.586077	0.194049	0.00252565	0.0269584
chr2L	11051847	11053763	1917	Peak_1330	1791.55	-0.639003	0.211647	0.0025345	0.0269584
chr3L	16206125	16207364	1240	Peak_7296	400.15	-0.664748	0.220014	0.00251616	0.0269584
chr3R	8133342	8133902	561	Peak_9204	211.181	-0.891924	0.295297	0.00252414	0.0269584
chr2L	20296739	20297238	500	Peak_2268	129.348	-0.895275	0.296401	0.00252373	0.0269584
chr3L	18007350	18007788	439	Peak_7548	237.149	-0.96518	0.319522	0.00252192	0.0269584
chr4	157445	157847	403	Peak_11476	166.746	-1.03161	0.341658	0.00253249	0.0269584
chrX	22227038	22228040	1003	Peak_14127	282.219	-0.810101	0.26834	0.00253669	0.0269614
chr3L	11335476	11336337	862	Peak_6657	678.35	0.773189	0.256174	0.00254263	0.026984
chr2R	10920057	10921904	1848	Peak_3846	783.378	-0.596359	0.19758	0.00254184	0.026984
chr2L	4626921	4627999	1079	Peak_561	426.044	0.83598	0.277079	0.00255192	0.0270623
chr2L	520957	521356	400	Peak_90	149.869	0.855246	0.283774	0.00257977	0.0273267
chr3L	20573310	20573883	574	Peak_7863	339.816	-0.623787	0.206983	0.00258073	0.0273267
chr3R	15221266	15221558	293	Peak_10051	86.1946	1.00766	0.334493	0.00259107	0.0273542
chr2R	14582584	14582938	355	Peak_4328	129.716	0.873232	0.289856	0.00258985	0.0273542
chr2R	10191892	10192583	692	Peak_3752	209.622	0.717484	0.238158	0.00258992	0.0273542
chr3L	11440337	11440767	431	Peak_6684	93.2861	-1.00136	0.332354	0.00258742	0.0273542
chr3L	22458621	22460576	1956	Peak_8131	1918.64	-0.634324	0.21063	0.00259907	0.0274109
chr3R	24505209	24505721	513	Peak_11034	228.563	-0.719828	0.239033	0.00260031	0.0274109
chr2R	12275305	12275715	411	Peak_4025	163.644	-0.867084	0.28801	0.00260729	0.0274435
chr2L	20940459	20940792	334	Peak_2337	126.971	-0.910847	0.302532	0.00260607	0.0274435
chr3L	10708600	10710346	1747	Peak_6532	1975.78	0.677621	0.225126	0.00261283	0.0274814
chrX	19184128	19184526	399	Peak_13867	217.8	-0.860949	0.286087	0.00261767	0.0275118
chr3R	10522299	10523313	1015	Peak_9478	928.109	0.517005	0.17187	0.00262867	0.0276069
chrX	19467810	19468126	317	Peak_13909	138.097	0.910543	0.302851	0.00264212	0.0277145
chr3R	17464062	17464651	590	Peak_10287	296.299	-0.896904	0.298323	0.00264284	0.0277145
chr2R	11672688	11673113	426	Peak_3933	123.755	0.845995	0.28144	0.00264752	0.027743
chr2L	13150879	13151090	212	Peak_1552	87.5833	0.958106	0.318886	0.0026598	0.0278346
chr3L	6456378	6457454	1077	Peak_6045	334.54	0.894049	0.29757	0.0026602	0.0278346
chr3R	8890882	8891438	557	Peak_9269	368.236	0.675521	0.224891	0.00266654	0.0278803
chr2L	14397150	14397456	307	Peak_1677	131.724	-0.797271	0.265479	0.00267207	0.0279175
chr3L	16800145	16801077	933	Peak_7378	359.427	0.70613	0.235148	0.00267408	0.0279179
chr3L	2873970	2874523	554	Peak_5611	129.005	-1.1398	0.379678	0.00268185	0.0279784
chrX	19183245	19183857	613	Peak_13866	416.731	-0.825095	0.274913	0.00268834	0.0280254
chr2R	15974798	15975466	669	Peak_4490	331.84	-0.896386	0.298699	0.00269119	0.0280344
chr2L	11403832	11404109	278	Peak_1388	81.1059	1.05643	0.352105	0.0026968	0.0280722
chr2R	13603740	13605298	1559	Peak_4166	1497.21	-0.537684	0.179244	0.00270222	0.0281078
chr2L	5485161	5486014	854	Peak_670	304.874	-0.796317	0.265531	0.00270901	0.0281578
chr3R	1072517	1073111	595	Peak_8341	292.161	-0.79116	0.263843	0.00271222	0.0281705
chr2L	2925030	2926441	1412	Peak_375	504.259	0.741359	0.247269	0.00271596	0.0281886
chr3L	392401	393293	893	Peak_5250	1608.84	-0.596015	0.198858	0.00272478	0.0282593
chrX	7452053	7453742	1690	Peak_12496	699.413	-0.742826	0.247909	0.0027322	0.0283155
chr2R	9173711	9174395	685	Peak_3615	261.056	-0.919477	0.306936	0.0027385	0.02836
chrX	3303610	3303944	335	Peak_12018	139.524	0.956411	0.319325	0.00274354	0.0283908
chr2R	11251256	11251673	418	Peak_3890	109.68	0.866716	0.289399	0.00274549	0.0283908
chrX	19612066	19612705	640	Peak_13941	177.802	0.790522	0.263981	0.00274794	0.0283954
chrX	17572272	17573062	791	Peak_13649	289.046	0.690725	0.230909	0.00277771	0.028682
chr3R	13251124	13251769	646	Peak_9824	604.105	-0.573519	0.191774	0.00278436	0.0287281
chr2L	7317981	7318729	749	Peak_883	348.41	-0.63537	0.212476	0.00278696	0.0287281
chr3R	19479538	19479883	346	Peak_10518	126.188	-0.754115	0.252198	0.00278826	0.0287281
chr2L	654695	654985	291	Peak_123	129.635	0.960228	0.321239	0.00279764	0.0288037
chr3R	9618859	9619857	999	Peak_9337	228.33	-1.09389	0.365993	0.0028006	0.0288132
chr2R	2409776	2410692	917	Peak_2657	380.635	-0.85948	0.287639	0.00280761	0.0288642
chr3L	19671214	19671874	661	Peak_7750	228.57	-0.945744	0.316849	0.00283728	0.0291481
chr3R	2766559	2767896	1338	Peak_8542	892.93	1.09262	0.36629	0.00285492	0.0292896
chr2R	18892129	18893194	1066	Peak_4857	380.511	0.903624	0.302956	0.00285727	0.0292896
chrX	16589724	16590065	342	Peak_13523	136.652	0.741592	0.248616	0.00285546	0.0292896
chr3L	10354134	10354541	408	Peak_6481	84.2592	1.07943	0.362017	0.00286646	0.0293413
chr2R	6079794	6080145	352	Peak_3175	110.143	0.811816	0.272257	0.00286561	0.0293413
chr3L	19697875	19698546	672	Peak_7763	515.362	-0.726216	0.243615	0.00287308	0.0293878
chr3L	395061	395686	626	Peak_5252	169.617	0.976882	0.32778	0.00287971	0.0294193
chr3L	11344096	11344451	356	Peak_6661	97.2814	0.896728	0.300892	0.00288033	0.0294193
chr3L	13375319	13376048	730	Peak_6936	382.705	-0.718266	0.241194	0.00290172	0.0294886
chr3L	12047485	12047935	451	Peak_6745	166.889	-0.782986	0.262874	0.00289611	0.0294886
chr2R	16101209	16102378	1170	Peak_4522	329.599	-0.934469	0.313694	0.00289267	0.0294886
chr3R	26112811	26113540	730	Peak_11259	198.162	-0.967231	0.324753	0.00289795	0.0294886
chr3L	10382686	10383310	625	Peak_6486	165.645	-0.994326	0.333824	0.00289575	0.0294886
chr2R	17479081	17479452	372	Peak_4682	97.7722	-1.00122	0.336101	0.0028926	0.0294886
chr3R	22865545	22866186	642	Peak_10913	189.176	-1.03022	0.345926	0.00289989	0.0294886
chr2L	18147718	18148130	413	Peak_2012	150.759	0.765082	0.256941	0.0029046	0.0294967
chr2R	11552426	11552846	421	Peak_3921	126.083	1.01405	0.340683	0.00291546	0.0295858
chr2R	11712345	11713483	1139	Peak_3941	480.594	-0.774469	0.260291	0.00292607	0.0296722
chr2R	2442602	2443017	416	Peak_2668	127.874	0.874178	0.293828	0.00292859	0.0296764
chrX	7601884	7602409	526	Peak_12520	195.197	0.754065	0.253555	0.00293976	0.0297572
chr3R	2137745	2138115	371	Peak_8467	103.318	-1.05965	0.35632	0.00294078	0.0297572
chr3R	10308679	10309254	576	Peak_9453	245.098	1.03372	0.347672	0.00294663	0.0297716
chr3R	9750809	9751032	224	Peak_9365	78.7491	0.992878	0.333984	0.00295062	0.0297716
chr2L	7518102	7518685	584	Peak_916	188.065	0.857781	0.288491	0.00294583	0.0297716
chr2L	16599943	16600579	637	Peak_1911	293.131	-0.841	0.28289	0.00295011	0.0297716
chr2R	19474424	19475623	1200	Peak_4935	556.761	0.625703	0.210546	0.00296053	0.0297865
chr2L	13837180	13838023	844	Peak_1620	850.497	-0.495019	0.166566	0.00295952	0.0297865
chrX	4369023	4369644	622	Peak_12145	223.047	-0.908959	0.305819	0.00295667	0.0297865
chr2R	6956147	6956716	570	Peak_3285	162.094	-1.02046	0.343349	0.00295803	0.0297865
chrX	13643023	13643618	596	Peak_13198	274.861	0.991975	0.333892	0.00296887	0.0298492
chr3L	821806	824165	2360	Peak_5358	895.909	-0.724352	0.243833	0.00297137	0.0298531
chr2L	21064871	21065509	639	Peak_2364	291.871	-0.783614	0.263814	0.00297488	0.0298671
chr2L	1748421	1749001	581	Peak_256	250.697	-0.746095	0.251263	0.00298407	0.0299381
chr3R	6399138	6400330	1193	Peak_9023	1233.68	-0.659568	0.22236	0.0030149	0.0302046
chr2R	6759383	6759887	505	Peak_3264	192.889	-0.90056	0.303592	0.00301359	0.0302046
chr3R	17986822	17987166	345	Peak_10368	92.9602	-1.01847	0.343473	0.00302492	0.0302835
chr3L	6935350	6936148	799	Peak_6093	254.694	0.775275	0.261522	0.00303195	0.0303109
chr2L	16620161	16620885	725	Peak_1916	206.808	-0.883052	0.297861	0.00303033	0.0303109
chr4	414002	414315	314	Peak_11493	136.449	0.741556	0.250258	0.00304491	0.030419
chrX	13425062	13425569	508	Peak_13168	148.478	0.90194	0.30471	0.00307648	0.030691
chr3R	5399036	5400432	1397	Peak_8888	606.774	0.53561	0.180939	0.00307475	0.030691
chr2R	3578910	3579355	446	Peak_2835	213.335	-0.716432	0.242056	0.00307866	0.0306911
chr2L	3784239	3784584	346	Peak_478	83.9783	1.07088	0.362093	0.00310176	0.0308996
chrX	3710704	3710994	291	Peak_12071	84.9008	1.09798	0.371556	0.00312595	0.0311186
chr3R	18018317	18022026	3710	Peak_10379	3520.48	-0.592045	0.200388	0.0031319	0.0311559
chr3L	4227824	4229230	1407	Peak_5809	728.885	-0.747049	0.252942	0.00314253	0.0311935
chr3R	6484111	6484584	474	Peak_9043	220.989	-0.785326	0.265919	0.0031445	0.0311935
chr2L	5231566	5232610	1045	Peak_629	635.812	-0.833754	0.28227	0.00313948	0.0311935
chr3L	10319866	10320371	506	Peak_6471	156.475	-0.843516	0.285619	0.003144	0.0311935
chr3R	23004210	23004841	632	Peak_10932	208.389	-0.795711	0.269548	0.00315705	0.031296
chrX	8615597	8615881	285	Peak_12637	100.274	0.943868	0.319899	0.00317243	0.0314261
chr3R	4538855	4539475	621	Peak_8752	176.732	0.829895	0.281292	0.00317463	0.0314261
chr2R	8903011	8903622	612	Peak_3592	628.272	0.628482	0.213074	0.00318187	0.0314758
chr2R	7517044	7517744	701	Peak_3391	552.824	-0.843437	0.285987	0.00318587	0.0314912
chr3L	17602769	17603332	564	Peak_7486	133.096	-1.13491	0.384842	0.00318788	0.0314912
chr3L	11554012	11554527	516	Peak_6694	253.081	-0.776587	0.263519	0.00320883	0.0316759
chr2R	6100667	6101049	383	Peak_3179	80.5706	-1.11867	0.379645	0.00321279	0.0316929
chr2R	6416011	6416355	345	Peak_3209	126.099	0.819144	0.278162	0.0032312	0.0318302
chr2L	14175665	14176079	415	Peak_1644	112.391	-1.12524	0.382089	0.00322984	0.0318302
chr3L	7142164	7143037	874	Peak_6118	552.605	-0.624661	0.212249	0.00324994	0.0319925
chr2R	10013324	10013586	263	Peak_3722	88.3593	-0.93047	0.316256	0.00325949	0.0320641
chr3L	22830644	22831962	1319	Peak_8156	873.282	0.625633	0.212759	0.003276	0.0322042
chr2L	11965371	11967519	2149	Peak_1419	2218.49	-0.5445	0.185295	0.00329748	0.032351
chr3L	724208	728732	4525	Peak_5323	2027.76	-0.708853	0.241211	0.00329566	0.032351
chr3L	7599161	7599763	603	Peak_6160	195.456	-0.724745	0.246636	0.00329781	0.032351
chr3R	9615339	9616656	1318	Peak_9336	826.226	-1.09855	0.373918	0.00330402	0.0323895
chr3L	8831976	8833636	1661	Peak_6340	2053.74	-0.594919	0.202565	0.00331476	0.0324722
chr3R	17062841	17063239	399	Peak_10217	175.1	-0.668786	0.227775	0.00332288	0.0325293
chr3L	19769197	19769586	390	Peak_7765	117.881	0.868728	0.295977	0.00333419	0.0326026
chr3L	13068487	13068832	346	Peak_6904	84.4073	-0.945573	0.322166	0.00333498	0.0326026
chr2L	20879695	20879974	280	Peak_2325	92.8019	0.972362	0.331411	0.00334619	0.0326369
chrX	17606975	17607411	437	Peak_13660	221.406	0.841331	0.286706	0.0033411	0.0326369
chr3R	7684702	7686267	1566	Peak_9155	2109.68	-0.68521	0.233552	0.00334773	0.0326369
chr3R	6305040	6305747	708	Peak_9003	191.844	-0.924117	0.314974	0.00334681	0.0326369
chr2L	5230350	5231212	863	Peak_628	360.423	0.887873	0.30276	0.00336137	0.0326596
chr3R	19599543	19600085	543	Peak_10534	226.035	0.864987	0.294958	0.00336161	0.0326596
chr2L	8473069	8473979	911	Peak_1049	805.37	0.690001	0.235261	0.00335788	0.0326596
chr2R	12675236	12675658	423	Peak_4062	135.498	-0.814896	0.277873	0.00336116	0.0326596
chr3L	6434572	6435080	509	Peak_6041	179.75	-0.894285	0.30493	0.00335971	0.0326596
chr3L	14369849	14370263	415	Peak_7047	131.665	-0.951232	0.32473	0.00339722	0.0329664
chr2L	14182971	14183488	518	Peak_1646	192.284	-0.957088	0.326735	0.00339785	0.0329664
chrX	21460400	21461731	1332	Peak_14074	633.729	-0.758093	0.258829	0.00340126	0.0329768
chr2L	21814381	21814779	399	Peak_2444	160.115	-0.708044	0.24181	0.00341045	0.0330433
chr3R	10198484	10199667	1184	Peak_9428	877.143	0.599399	0.204721	0.00341285	0.0330439
chr2R	5383639	5385301	1663	Peak_3078	499.305	-1.14777	0.392177	0.00342617	0.0331501
chr3R	24683415	24685417	2003	Peak_11049	3138.53	-0.526028	0.179774	0.00343302	0.033171
chr3L	10780623	10781241	619	Peak_6548	160.815	-0.908683	0.310546	0.00343259	0.033171
chr3L	2487381	2489040	1660	Peak_5561	1092.76	-0.473929	0.162013	0.00344175	0.0332327
chrX	12101192	12101692	501	Peak_13020	244.891	0.67407	0.230495	0.00345071	0.0332964
chrX	8349077	8349763	687	Peak_12602	228.636	0.805984	0.275769	0.00347036	0.0334632
chr2L	7576308	7577895	1588	Peak_925	1294.12	-0.553707	0.189475	0.00347425	0.0334779
chr2R	4556215	4556653	439	Peak_2965	259.575	-0.6765	0.231578	0.00348612	0.0335465
chr3L	20726905	20727564	660	Peak_7887	618.108	-0.730832	0.250167	0.00348492	0.0335465
chr2L	14571188	14572223	1036	Peak_1729	443.979	-1.11809	0.382811	0.00349208	0.033581
chrX	16017837	16018649	813	Peak_13440	416.886	0.700234	0.239788	0.00349783	0.0336134
chr3L	21094473	21094765	293	Peak_7943	93.9789	0.883247	0.302504	0.00350272	0.0336375
chr3R	17739121	17739974	854	Peak_10338	580.069	0.673968	0.231018	0.00352979	0.0338632
chr2R	7906449	7907583	1135	Peak_3454	751.749	-0.483387	0.165699	0.00353127	0.0338632
chr2L	7911096	7911951	856	Peak_961	444.247	-0.775184	0.265741	0.00353341	0.0338632
chrX	4937972	4939235	1264	Peak_12208	1805.3	-0.557786	0.191259	0.00354111	0.033871
chr3L	10356460	10357254	795	Peak_6482	559.555	-0.64586	0.221461	0.00354141	0.033871
chr2R	15799378	15800133	756	Peak_4460	550.599	-0.660132	0.226323	0.00353681	0.033871
chr3L	12718946	12719857	912	Peak_6865	684.031	-0.722447	0.247751	0.00354526	0.033885
chr3R	26100396	26103090	2695	Peak_11254	2083.97	0.448118	0.153745	0.00356052	0.0340078
chr3L	18249778	18250298	521	Peak_7606	107.784	1.07623	0.369451	0.00357926	0.0341637
chr3L	4413874	4414411	538	Peak_5848	218.749	0.746154	0.256223	0.00358971	0.0342326
chr3L	12048185	12048806	622	Peak_6746	396.75	-0.576699	0.198046	0.00359189	0.0342326
chrX	7107715	7108082	368	Peak_12462	108.552	-0.866643	0.297633	0.00359375	0.0342326
chr2L	14622499	14622903	405	Peak_1742	168.033	-0.822632	0.282619	0.00360569	0.0343232
chr2R	3776862	3778113	1252	Peak_2864	662.662	-0.526402	0.180863	0.00360853	0.0343272
chrX	1178208	1178686	479	Peak_11714	183.119	0.909133	0.312428	0.00361543	0.0343697
chrX	596293	596766	474	Peak_11633	226.901	0.718961	0.247145	0.00362513	0.0344388
chr3L	2144383	2144733	351	Peak_5524	111.567	0.906213	0.311575	0.00363177	0.0344787
chrX	7532864	7533112	249	Peak_12507	75.4107	0.983475	0.338208	0.00363863	0.0345206
chr2L	59055	59592	538	Peak_8	427.293	-0.538561	0.185268	0.00364993	0.0346046
chrX	16501808	16502312	505	Peak_13503	343.219	-0.549703	0.189314	0.00368828	0.0348979
chr2R	17362155	17363809	1655	Peak_4652	2315.09	-0.586219	0.201882	0.00368696	0.0348979
chr2R	15907068	15907465	398	Peak_4478	116.655	-0.88799	0.305778	0.00368391	0.0348979
chr3R	2813333	2814532	1200	Peak_8553	640.969	-0.592961	0.204305	0.00370402	0.0350234
chr3L	6272171	6273140	970	Peak_6009	283.026	-0.784242	0.270404	0.00372852	0.0352315
chr2L	19895845	19896311	467	Peak_2224	209.251	-0.744034	0.256801	0.00376366	0.0355398
chrX	1291859	1294656	2798	Peak_11732	4276.68	-0.653971	0.225778	0.00377321	0.0356062
chr2L	14596179	14596764	586	Peak_1736	261.754	-0.783592	0.270556	0.0037768	0.0356163
chr3R	13532301	13533022	722	Peak_9847	300.645	0.696458	0.240489	0.00377938	0.0356169
chrX	12797111	12797693	583	Peak_13093	297.402	0.555606	0.191888	0.00378591	0.0356547
chr3R	9924311	9924678	368	Peak_9401	148.258	0.868071	0.30002	0.00381121	0.035869
chr2L	707994	708737	744	Peak_137	447.94	0.974361	0.33681	0.00381693	0.0358989
chr3L	3771132	3772049	918	Peak_5745	406.9	-0.572485	0.197908	0.00381961	0.0359003
chrX	11534356	11534772	417	Peak_12962	221.335	1.01362	0.350472	0.00382598	0.0359363
chr3L	21784644	21785101	458	Peak_8038	142.781	0.927889	0.320992	0.00384398	0.0360096
chr2R	14160726	14161154	429	Peak_4250	135.476	0.833534	0.288347	0.00384342	0.0360096
chr4	523092	523742	651	Peak_11507	271.768	0.550922	0.190577	0.00384251	0.0360096
chrX	5194336	5195241	906	Peak_12220	391.721	-0.745717	0.257929	0.00383809	0.0360096
chr2R	18556809	18557077	269	Peak_4820	105.859	0.74367	0.257343	0.00385482	0.0360873
chrX	12139855	12141046	1192	Peak_13027	647.479	-0.706191	0.244432	0.00386339	0.0361435
chr2L	7005428	7005984	557	Peak_838	494.244	-0.630482	0.218376	0.00388768	0.0363467
chr3L	15222942	15224719	1778	Peak_7166	871.202	0.755544	0.261765	0.00389743	0.0364138
chr3L	14797773	14798395	623	Peak_7107	461.808	0.690589	0.239348	0.00391043	0.0365112
chr2R	16098080	16098583	504	Peak_4521	138.837	-0.837712	0.290439	0.00392295	0.0366038
chrX	12563702	12564890	1189	Peak_13062	645.575	0.462252	0.160359	0.00394411	0.036777
chrX	13713337	13714009	673	Peak_13209	441.169	-0.711031	0.246688	0.00394768	0.036786
chr3R	21781784	21782186	403	Peak_10793	212.167	-0.704091	0.244337	0.00395615	0.0368407
chr2R	2852040	2852430	391	Peak_2720	139.063	-0.734876	0.255065	0.00396247	0.0368752
chr2R	20849119	20849574	456	Peak_5147	168.053	0.842148	0.292381	0.00397281	0.0369471
chr3L	20502183	20503164	982	Peak_7850	559.035	0.545373	0.189374	0.00397847	0.0369754
chr3L	617832	620598	2767	Peak_5290	3365.84	-0.480041	0.166741	0.00398981	0.0370565
chr3R	1126530	1126942	413	Peak_8352	113.996	0.95378	0.331354	0.00399653	0.0370921
chr3L	14335550	14336315	766	Peak_7036	368.197	0.690548	0.239919	0.00399889	0.0370921
chr3R	11112346	11112775	430	Peak_9540	200.149	0.740304	0.257391	0.00402508	0.0373075
chrX	19252879	19254085	1207	Peak_13884	1217.66	-0.530782	0.184555	0.00402739	0.0373075
chr3R	22896840	22897362	523	Peak_10916	183.469	0.573011	0.199271	0.00403338	0.0373377
chr2L	11378704	11379861	1158	Peak_1379	291.778	-0.72148	0.25092	0.00403593	0.0373377
chr3R	17282297	17283000	704	Peak_10251	427.658	0.679774	0.236449	0.00404122	0.0373621
chr3L	2835316	2836280	965	Peak_5601	500.958	-0.674926	0.23482	0.00405022	0.0374063
chr2L	14366954	14367378	425	Peak_1669	215.8	-0.783862	0.272729	0.00405129	0.0374063
chr3L	8066935	8067565	631	Peak_6226	364.69	0.735242	0.255839	0.00405501	0.0374162
chr2R	11734429	11735033	605	Peak_3943	348.93	-0.681304	0.237146	0.00406693	0.0374772
chr2L	8204826	8205636	811	Peak_1002	423.172	-0.686701	0.239017	0.00406564	0.0374772
chr2R	6417958	6418371	414	Peak_3210	164.841	0.718187	0.250146	0.0040908	0.0376727
chrX	10096201	10096728	528	Peak_12800	189.225	-0.869228	0.30286	0.0041039	0.0377687
chr4	546586	547009	424	Peak_11513	146.775	-0.845236	0.294547	0.00410971	0.0377976
chr3R	14299094	14300562	1469	Peak_9929	1654.08	0.600701	0.209508	0.0041413	0.0380633
chrX	1742895	1743387	493	Peak_11775	131.433	0.880432	0.307118	0.00414706	0.0380915
chr3L	4225974	4226469	496	Peak_5807	168.414	0.742711	0.259144	0.00415672	0.0381344
chr2L	10615411	10616689	1279	Peak_1280	550.662	-0.723643	0.252494	0.00415713	0.0381344
chrX	1973985	1974942	958	Peak_11818	583.191	0.501402	0.175056	0.00418	0.0381848
chr2R	7085499	7087622	2124	Peak_3319	1245.11	0.439792	0.153541	0.00417903	0.0381848
chr3R	24921030	24923064	2035	Peak_11078	3157.31	-0.57181	0.199638	0.00418023	0.0381848
chr3R	6214527	6215307	781	Peak_8989	473.707	-0.612243	0.213808	0.00418963	0.0381848
chr2R	16080921	16081702	782	Peak_4517	245.095	-0.680905	0.237746	0.00418319	0.0381848
chrX	20109690	20110301	612	Peak_13987	602.316	-0.719644	0.25128	0.00418448	0.0381848
chr2R	6101211	6101992	782	Peak_3180	1072.17	-0.773053	0.269861	0.00417485	0.0381848
chr3R	13866460	13867162	703	Peak_9865	200.29	-0.862561	0.301211	0.00418799	0.0381848
chr2L	18123603	18123893	291	Peak_2006	111.789	-0.91141	0.318212	0.00418122	0.0381848
chrX	10020479	10021086	608	Peak_12799	162.188	-0.974223	0.340114	0.00417795	0.0381848
chrX	22249166	22249807	642	Peak_14135	193.121	-0.992023	0.346523	0.00419924	0.0382477
chr3L	3239378	3240544	1167	Peak_5659	781.118	0.493745	0.172597	0.0042272	0.0384776
chr3L	2531397	2531695	299	Peak_5564	105.047	0.884797	0.309376	0.00423713	0.0385431
chrX	18430879	18435497	4619	Peak_13761	4008.59	-0.427072	0.149403	0.00425625	0.0386921
chr2R	18196134	18196475	342	Peak_4770	121.1	0.831569	0.291042	0.00427383	0.038827
chr3L	1204121	1204714	594	Peak_5396	173.926	0.77771	0.272268	0.00428449	0.0388989
chr3R	8086902	8087444	543	Peak_9198	181.853	0.784797	0.274808	0.00429288	0.03895
chrX	21880967	21881829	863	Peak_14102	399.809	-0.845622	0.29613	0.00429588	0.0389523
chr3L	7803647	7804075	429	Peak_6182	233.294	-0.621389	0.217672	0.00430772	0.0390095
chr3R	14467995	14468333	339	Peak_9944	119.341	-0.906524	0.317534	0.00430518	0.0390095
chr3L	14144664	14145171	508	Peak_7009	162.341	0.945135	0.331298	0.00433331	0.0391661
chr3L	881682	882356	675	Peak_5370	289.61	0.60805	0.213129	0.00433125	0.0391661
chrX	20204961	20205715	755	Peak_13993	189.253	-0.913243	0.320075	0.00432791	0.0391661
chr2L	21248797	21249282	486	Peak_2392	320.643	-0.641267	0.224883	0.00435047	0.0392917
chr3L	21232839	21233644	806	Peak_7960	1013.74	-0.645535	0.226409	0.00435556	0.0392917
chr3L	12041424	12042048	625	Peak_6742	199.724	-0.869211	0.30484	0.00435313	0.0392917
chr2R	3032293	3034027	1735	Peak_2748	1433.94	-0.583207	0.204773	0.00439853	0.0396442
chr3L	6999140	6999591	452	Peak_6105	161.26	-0.788514	0.276871	0.00440024	0.0396442
chr4	1000293	1001106	814	Peak_11545	571.11	0.588284	0.206644	0.00441544	0.0397558
chr2L	21764957	21765551	595	Peak_2431	505.667	-0.708881	0.249071	0.00442588	0.0398017
chr3L	14357370	14358403	1034	Peak_7045	513.82	-0.82315	0.289223	0.00442617	0.0398017
chrX	17419634	17420128	495	Peak_13626	159.864	0.80581	0.28319	0.00443447	0.0398511
chr3L	10839821	10840524	704	Peak_6556	179.979	0.750476	0.263823	0.00444639	0.0399328
chr3L	13478952	13482503	3552	Peak_6953	2524.41	-0.522638	0.183836	0.00446964	0.0401161
chr2L	14436883	14437685	803	Peak_1686	239.803	0.781002	0.274782	0.00447944	0.0401786
chr3R	622933	624099	1167	Peak_8252	417.385	-0.534363	0.188043	0.00448737	0.0402241
chr3L	18232187	18232997	811	Peak_7601	694.552	-0.486367	0.171174	0.00449217	0.0402416
chr3L	9848721	9849562	842	Peak_6450	518.253	-0.702115	0.247302	0.00452407	0.0405017
chr3L	13260587	13260997	411	Peak_6935	110.408	-0.895443	0.315658	0.0045575	0.0407752
chr2R	19473258	19474350	1093	Peak_4934	339.129	0.661309	0.233206	0.00457206	0.0408796
chr2R	19092776	19093483	708	Peak_4886	207.857	-0.912236	0.32175	0.00457923	0.0409179
chrX	19054262	19054738	477	Peak_13847	205.78	-0.905002	0.319224	0.0045825	0.0409212
chr3R	22681202	22682186	985	Peak_10880	373.373	-0.672373	0.237199	0.00458784	0.040943
chr3R	5243311	5245400	2090	Peak_8865	1675.21	0.50449	0.178079	0.00461207	0.0411333
chrX	14373855	14374752	898	Peak_13264	673.09	-0.605583	0.213864	0.00463121	0.0412779
chr2L	19949073	19950218	1146	Peak_2234	980.562	-0.482865	0.170577	0.00464354	0.0413617
chr3L	18050078	18050546	469	Peak_7556	252.206	0.694095	0.245235	0.00464999	0.0413931
chr3R	21287571	21289555	1985	Peak_10742	2191.28	-0.525461	0.185687	0.00465747	0.0414336
chrX	3246539	3246784	246	Peak_12001	66.4877	0.82613	0.292084	0.00467812	0.0415535
chr2R	2698316	2700262	1947	Peak_2712	996.145	0.442979	0.156647	0.00468564	0.0415535
chr3R	22309169	22310240	1072	Peak_10856	416.103	-0.629802	0.222694	0.00468243	0.0415535
chr2L	19225598	19226934	1337	Peak_2155	719.471	-0.650702	0.230049	0.00467606	0.0415535
chr2R	8125734	8126075	342	Peak_3481	109.16	-0.810803	0.286701	0.00468332	0.0415535
chrX	13008160	13008566	407	Peak_13103	133.224	-0.722848	0.255747	0.00470709	0.0417175
chr3R	5252850	5253416	567	Peak_8866	163.754	0.758167	0.268429	0.00473612	0.0419485
chr2L	2462057	2462661	605	Peak_326	221.895	0.64174	0.227298	0.0047527	0.042069
chr3R	17473874	17475237	1364	Peak_10292	884.151	-0.557615	0.197522	0.00475677	0.0420787
chr3R	26649496	26649816	321	Peak_11318	144.386	0.952169	0.337382	0.00476916	0.0421355
chr3L	12575446	12576121	676	Peak_6830	185.828	-0.907127	0.321404	0.00476678	0.0421355
chr2R	12936380	12936921	542	Peak_4090	184.008	0.678181	0.240402	0.00478697	0.0422664
chr2R	14117104	14118249	1146	Peak_4232	652.009	0.613526	0.217562	0.00480235	0.0423758
chr2R	7064093	7064497	405	Peak_3308	190.852	0.754615	0.267616	0.00480579	0.0423797
chr3R	10535521	10536042	522	Peak_9480	114.581	0.978588	0.347244	0.00482997	0.0425472
chr3R	19733830	19735023	1194	Peak_10554	350.264	-0.709044	0.251603	0.0048308	0.0425472
chr2L	15391950	15392258	309	Peak_1815	87.413	-0.901303	0.319871	0.00483684	0.0425738
chr3R	10478811	10479531	721	Peak_9471	454.515	-0.726313	0.257969	0.00487015	0.0428403
chr3L	22387079	22387928	850	Peak_8114	295.431	-0.859282	0.305219	0.00487323	0.0428408
chr3L	6799942	6800291	350	Peak_6071	109.179	0.95866	0.34057	0.00487965	0.0428705
chr3R	11362844	11363324	481	Peak_9573	170.141	0.928482	0.329899	0.0048861	0.0429005
chr3L	11374038	11375708	1671	Peak_6670	1743.66	-0.514015	0.182672	0.00489495	0.0429516
chr3R	19609485	19609937	453	Peak_10536	176.742	-0.804278	0.285931	0.0049106	0.0430622
chr3L	6117886	6118170	285	Peak_5986	107.701	0.883627	0.314184	0.00491657	0.0430878
chr2L	4576499	4577062	564	Peak_550	212.055	0.878913	0.312615	0.00493133	0.0431904
chrX	13518278	13519822	1545	Peak_13179	1406.81	0.520416	0.185155	0.00494327	0.0432681
chrX	9581756	9582103	348	Peak_12755	140.17	0.825387	0.293692	0.00494822	0.0432847
chr2R	19461853	19462261	409	Peak_4932	152.959	1.04796	0.372978	0.00495865	0.0433491
chr2L	8699811	8700075	265	Peak_1078	100.484	0.908556	0.323393	0.00496261	0.0433569
chrX	16202222	16203085	864	Peak_13469	284.966	-0.687008	0.244595	0.00497328	0.0434233
chr3L	16471854	16472121	268	Peak_7328	89.817	1.01607	0.361936	0.00499572	0.0435923
chr3L	4304218	4305114	897	Peak_5829	191.265	-0.998616	0.355764	0.00500113	0.0436126
chrX	13132230	13132653	424	Peak_13120	149.501	-0.859353	0.306236	0.00501322	0.043691
chr3L	8852304	8853021	718	Peak_6341	268.851	0.665838	0.23735	0.00502698	0.043784
chr3L	14508441	14509265	825	Peak_7065	248.096	-0.899186	0.320593	0.0050354	0.0438303
chrX	614444	614752	309	Peak_11637	104.077	0.814074	0.290548	0.00508098	0.044161
chr3L	139865	140086	222	Peak_5197	156.981	0.682444	0.243546	0.00507681	0.044161
chr2L	19440634	19441201	568	Peak_2183	177.306	-0.676467	0.241446	0.00508301	0.044161
chr3R	10507289	10507657	369	Peak_9476	89.0711	-1.07331	0.383115	0.00508588	0.044161
chr3L	9688280	9688784	505	Peak_6433	310.14	0.613486	0.219012	0.00509197	0.0441866
chr3L	23682875	23683341	467	Peak_8183	123.391	-0.719794	0.257078	0.00511176	0.0443312
chr3R	4851848	4852261	414	Peak_8809	154.465	-0.842277	0.300902	0.00512333	0.0444043
chrX	8316520	8316924	405	Peak_12600	169.462	0.618509	0.221008	0.00513283	0.0444594
chr2R	11016638	11017673	1036	Peak_3857	839.486	0.635255	0.227112	0.00515641	0.0446089
chr3R	4804020	4805287	1268	Peak_8800	476.163	-0.611322	0.218542	0.00515362	0.0446089
chr2L	14550584	14551803	1220	Peak_1719	549.527	-0.827816	0.296035	0.00516848	0.044686
chr2R	11418991	11419985	995	Peak_3906	390.813	0.550385	0.196913	0.00518881	0.0448039
chr3R	19759433	19760926	1494	Peak_10565	869.923	-0.484749	0.173422	0.00518676	0.0448039
chrX	11669995	11670805	811	Peak_12977	446.251	-0.559771	0.200283	0.00519163	0.0448039
chr2L	502640	503044	405	Peak_84	172.288	0.725811	0.259744	0.00520067	0.0448546
chr3L	20648789	20650379	1591	Peak_7874	1185.57	-0.521378	0.18663	0.00521183	0.0449235
chrX	4308540	4308880	341	Peak_12129	128.626	0.841527	0.301375	0.00523365	0.045084
chr3L	22411020	22411590	571	Peak_8120	223.611	0.872929	0.312818	0.00526215	0.045111
chr2R	12996111	12996774	664	Peak_4102	261.431	0.797499	0.285686	0.00524601	0.045111
chr2L	18677030	18677776	747	Peak_2069	334.946	0.567525	0.203352	0.00525704	0.045111
chr3R	27234942	27236023	1082	Peak_11366	634.407	-0.532177	0.190703	0.00526099	0.045111
chr3L	5796050	5796459	410	Peak_5952	140.238	-0.664376	0.238043	0.00525462	0.045111
chr2L	17380603	17381014	412	Peak_1969	187.78	-0.702174	0.251547	0.00524759	0.045111
chr2L	18466639	18467190	552	Peak_2035	397.778	-0.865887	0.310296	0.00526232	0.045111
chrX	16036528	16037769	1242	Peak_13445	309.072	-0.908596	0.325462	0.00524301	0.045111
chr2L	12504874	12505308	435	Peak_1472	212.365	0.586225	0.210127	0.00527309	0.045176
chrX	3271711	3272164	454	Peak_12004	195.292	-0.888709	0.318599	0.0052802	0.0452095
chr3R	11938473	11939402	930	Peak_9632	254.719	-0.959001	0.343927	0.0052971	0.0453267
chrX	7384674	7385609	936	Peak_12482	426.225	-0.546192	0.195944	0.00531168	0.045424
chr2R	7080227	7080704	478	Peak_3316	202.845	0.706242	0.253424	0.00532307	0.045439
chrX	19500600	19502786	2187	Peak_13916	1018.27	0.44771	0.160653	0.00532299	0.045439
chr2L	11587593	11587919	327	Peak_1404	123.029	-0.847253	0.303993	0.00531854	0.045439
chrX	10704752	10705343	592	Peak_12873	317.198	0.883063	0.31708	0.00535301	0.0456496
chr3R	20881742	20882921	1180	Peak_10702	541.09	0.566034	0.20325	0.0053542	0.0456496
chr3R	864689	864958	270	Peak_8307	106.289	0.915106	0.328629	0.00535903	0.0456632
chr2R	11381154	11381499	346	Peak_3899	119.565	-0.795686	0.285805	0.00536905	0.045666
chr2R	17421517	17422646	1130	Peak_4666	265.074	-0.89023	0.319742	0.00536585	0.045666
chr2R	8550442	8550981	540	Peak_3535	191.786	-0.930267	0.334124	0.005366	0.045666
chr3L	9413171	9413803	633	Peak_6400	202.818	-0.863398	0.310263	0.00538935	0.0457963
chr2L	14549555	14550157	603	Peak_1718	158.719	-0.885943	0.318375	0.00539085	0.0457963
chr3L	11336474	11337372	899	Peak_6658	778.954	0.733783	0.263808	0.00541072	0.0459375
chr2R	8425405	8425813	409	Peak_3521	96.4446	0.962062	0.346045	0.00543314	0.0460725
chrX	16985148	16986065	918	Peak_13568	403.579	0.472791	0.170051	0.00543112	0.0460725
chrX	10436236	10436674	439	Peak_12831	148.722	-0.760562	0.273673	0.00545104	0.0461966
chr3R	2855838	2856285	448	Peak_8562	121.401	-0.987513	0.355394	0.0054586	0.0462329
chrX	15697947	15698778	832	Peak_13403	543.057	0.490835	0.176665	0.00546386	0.0462498
chr3L	12544528	12545649	1122	Peak_6820	609.009	-0.594204	0.213894	0.00546903	0.0462659
chr2R	9727350	9727848	499	Peak_3674	145.376	-0.79317	0.285745	0.00550664	0.0465562
chr2L	8276975	8277380	406	Peak_1010	224.827	0.717179	0.258413	0.00551466	0.0465712
chr3R	25353091	25353496	406	Peak_11137	147.453	-0.829957	0.299051	0.00551501	0.0465712
chrX	7861061	7862498	1438	Peak_12547	923.425	0.481764	0.173648	0.00553092	0.0466653
chrX	5583286	5585386	2101	Peak_12250	1421.29	0.4351	0.156835	0.00553276	0.0466653
chr3R	11738798	11739568	771	Peak_9604	597.912	-0.5191	0.187199	0.0055545	0.0467871
chr2L	606035	607129	1095	Peak_110	334.317	-0.656343	0.236695	0.00555507	0.0467871
chr3L	5620764	5621548	785	Peak_5936	641.32	-0.721179	0.260088	0.00555712	0.0467871
chr3L	11282141	11282834	694	Peak_6645	236.69	-0.712605	0.257056	0.00556832	0.0468534
chr2R	13526332	13526924	593	Peak_4158	605.34	-0.562848	0.203054	0.0055728	0.0468633
chr3R	15203231	15203742	512	Peak_10050	168.906	-0.863766	0.311638	0.0055765	0.0468664
chrX	4601109	4602043	935	Peak_12183	323.75	0.668275	0.241196	0.00559413	0.0469588
chr3L	13874621	13875132	512	Peak_6965	277.397	-0.685935	0.247568	0.00559369	0.0469588
chr3R	6181321	6183475	2155	Peak_8985	2230.14	-0.449505	0.162273	0.00560485	0.0470209
chrX	13959705	13959999	295	Peak_13237	116.543	-0.797595	0.287977	0.00561172	0.0470506
chr3L	11480312	11481132	821	Peak_6685	575.347	0.574278	0.207406	0.00562538	0.0471371
chr2L	19894909	19895590	682	Peak_2223	161.774	-0.679982	0.24564	0.00563662	0.0471845
chr2R	2638830	2639250	421	Peak_2706	128.88	-0.781083	0.282169	0.0056377	0.0471845
chr2L	19423381	19424191	811	Peak_2177	399.625	0.586162	0.211811	0.00565092	0.0472671
chr2R	1636564	1637542	979	Peak_2567	799.732	-0.623151	0.225298	0.00567667	0.0474544
chr3R	5432887	5433439	553	Peak_8894	259.347	-0.750142	0.271299	0.00569222	0.0475563
chr3L	17589987	17590384	398	Peak_7482	183.498	0.866712	0.313508	0.00569993	0.0475612
chr3L	16374535	16374919	385	Peak_7316	169.313	0.54567	0.197392	0.0057029	0.0475612
chr3L	21101348	21101654	307	Peak_7945	84.9342	-0.992031	0.358814	0.00569668	0.0475612
chrX	3761512	3763021	1510	Peak_12084	492.899	-0.513164	0.185671	0.00571277	0.0475873
chr3L	11366356	11367030	675	Peak_6666	371.4	-0.844973	0.305717	0.00571143	0.0475873
chrX	299789	300916	1128	Peak_11600	454.356	-0.682437	0.246996	0.00572813	0.0476717
chrX	14583250	14583626	377	Peak_13278	115.868	-0.902244	0.326561	0.00572965	0.0476717
chr3R	9829505	9830163	659	Peak_9381	329.057	0.858205	0.310919	0.00577617	0.0479741
chr2L	11038048	11038581	534	Peak_1324	228.236	0.821194	0.297489	0.0057727	0.0479741
chr2L	3341235	3341562	328	Peak_412	108.381	-0.794896	0.287974	0.00577473	0.0479741
chr2L	7870199	7870615	417	Peak_951	137.525	-0.875211	0.317117	0.00578195	0.0479939
chr2R	7815187	7815487	301	Peak_3441	99.1057	0.891071	0.322892	0.00578627	0.0480016
chr2R	6620103	6620396	294	Peak_3245	93.412	0.749474	0.271656	0.00579948	0.048083
chr3L	5540475	5540998	524	Peak_5916	240.467	-0.717473	0.260102	0.00580792	0.0481247
chr2L	39287	39746	460	Peak_4	185.427	-0.758318	0.274986	0.00582172	0.0482108
chr2R	2927317	2927920	604	Peak_2731	370.014	-0.655605	0.237934	0.00586178	0.0485141
chr3L	6792928	6793524	597	Peak_6069	155.276	-0.874527	0.317437	0.00586981	0.0485238
chr3R	16113552	16114530	979	Peak_10116	280.313	-0.894816	0.324792	0.00586845	0.0485238
chr2L	8844704	8845040	337	Peak_1086	103.385	0.804681	0.292428	0.00592826	0.0489783
chr3L	5943451	5944118	668	Peak_5976	592.895	-0.523837	0.190443	0.00594817	0.0491141
chr3R	17797626	17798246	621	Peak_10345	161.778	-1.03079	0.374859	0.00596334	0.0492106
chr3R	6348686	6349340	655	Peak_9010	204.857	-0.976195	0.35509	0.00597502	0.0492782
chr3L	9050523	9051583	1061	Peak_6371	797.78	-0.567498	0.206451	0.00598087	0.0492977
chr3R	12367181	12367686	506	Peak_9737	154.737	-0.709613	0.25819	0.00598838	0.0493308
chr2R	20472072	20472466	395	Peak_5090	104.769	0.91572	0.333274	0.00600248	0.0493994
chr3R	11950901	11951258	358	Peak_9637	125.743	0.915285	0.333135	0.00600538	0.0493994
chr3R	20476572	20477370	799	Peak_10657	536.881	0.501701	0.182617	0.00600923	0.0493994
chr3L	18753746	18754236	491	Peak_7633	379.051	-0.651725	0.237233	0.00601069	0.0493994
chr3L	5625675	5627774	2100	Peak_5939	1824.07	-0.586638	0.213623	0.00603019	0.049531
chr3R	1188759	1189644	886	Peak_8362	945.396	-0.529003	0.192727	0.00605427	0.0496999
chrX	351109	352111	1003	Peak_11605	403.07	0.80516	0.293596	0.00609898	0.0500379
chr2L	8293177	8293465	289	Peak_1017	85.3692	0.911572	0.332543	0.00612122	0.0501231
chr2R	17474207	17475295	1089	Peak_4680	314.141	-0.611595	0.223083	0.00611474	0.0501231
chr2L	5406964	5407334	371	Peak_659	111.871	-0.738131	0.269283	0.00612355	0.0501231
chr2L	12646434	12647054	621	Peak_1503	295.914	-0.774355	0.282492	0.00612231	0.0501231
chrX	17700046	17700950	905	Peak_13675	339.442	0.675703	0.246545	0.0061311	0.0501558
chr2R	3454010	3454993	984	Peak_2817	507.191	0.428307	0.15635	0.00615482	0.0502817
chr2R	2351184	2351593	410	Peak_2645	208.752	-0.660627	0.241158	0.00615527	0.0502817
chrX	4345934	4346314	381	Peak_12139	129.734	-0.783892	0.286166	0.00615716	0.0502817
chr2R	18623032	18623536	505	Peak_4830	191.379	-0.572949	0.209277	0.00618601	0.0504882
chr2L	2858052	2858459	408	Peak_363	221.234	0.547004	0.199846	0.00619775	0.0505548
chr2R	9803029	9804168	1140	Peak_3681	467.235	-0.489535	0.17892	0.00621808	0.0506913
chrX	21102200	21102689	490	Peak_14049	228.005	0.656544	0.23998	0.00622222	0.0506959
chr3R	6425153	6427154	2002	Peak_9031	1165.63	0.470984	0.172258	0.0062536	0.0508928
chrX	1860140	1860624	485	Peak_11798	140.408	-0.726999	0.265885	0.00625201	0.0508928
chr3L	6330994	6331436	443	Peak_6020	130.462	0.945148	0.345841	0.00627795	0.0510322
chr3R	12089585	12090162	578	Peak_9679	264.447	0.618165	0.226182	0.00627531	0.0510322
chr2L	3585444	3585778	335	Peak_451	129.908	0.796376	0.291513	0.00629752	0.051162
chr2R	2757373	2758007	635	Peak_2714	261.361	-0.91315	0.334288	0.00630232	0.0511715
chrX	10523165	10523599	435	Peak_12846	181.228	0.683691	0.250375	0.00632074	0.0512916
chr3L	21887600	21888415	816	Peak_8060	654.986	-0.890984	0.32644	0.00634511	0.0514598
chr2L	16321349	16321751	403	Peak_1869	174.216	0.645782	0.236701	0.00636682	0.0516063
chr2R	16158192	16158966	775	Peak_4530	292.982	0.803352	0.294599	0.00639252	0.0517849
chr2L	9182481	9183701	1221	Peak_1122	913.198	0.624067	0.228896	0.0064026	0.0518072
chr3L	1121689	1122294	606	Peak_5388	174.33	-0.728294	0.267106	0.00639894	0.0518072
chr3L	4388080	4388979	900	Peak_5842	301.84	0.845014	0.310044	0.00642117	0.0519277
chr3L	9541806	9543573	1768	Peak_6425	1696.48	-0.491331	0.1803	0.00642871	0.0519463
chr3R	20792609	20792940	332	Peak_10687	153.217	-0.70381	0.258282	0.00643082	0.0519463
chr2L	9175223	9175541	319	Peak_1119	163.449	0.608772	0.223435	0.00643788	0.0519737
chrX	8929206	8929629	424	Peak_12669	170.796	0.782444	0.287207	0.00644344	0.0519889
chr3R	27363370	27363816	447	Peak_11381	143.341	-0.869734	0.319303	0.00645253	0.0520325
chr3L	20627686	20627899	214	Peak_7871	35.7908	1.05336	0.387008	0.00649275	0.0522284
chr3R	10576848	10577104	257	Peak_9495	83.3397	0.817048	0.300188	0.00649299	0.0522284
chr3R	14268920	14269303	384	Peak_9920	145.529	0.793053	0.291343	0.00648764	0.0522284
chr2R	19457323	19457904	582	Peak_4930	165.74	0.696937	0.256007	0.00648219	0.0522284
chrX	20357936	20358495	560	Peak_14003	216.741	-0.672411	0.247058	0.00649529	0.0522284
chr2L	1901265	1901665	401	Peak_260	115.217	-0.83969	0.308609	0.00651067	0.0523222
chr2R	5328186	5330908	2723	Peak_3073	2272.06	-0.36615	0.134597	0.00652157	0.0523504
chr2R	7426057	7427293	1237	Peak_3363	878.757	-0.57983	0.213134	0.00651833	0.0523504
chr2L	12718744	12720540	1797	Peak_1514	695.815	0.686545	0.252404	0.00652763	0.0523693
chr3R	16445586	16446144	559	Peak_10147	371.316	-0.687194	0.252676	0.0065348	0.052397
chr3R	25886560	25887434	875	Peak_11220	534.295	-0.604734	0.222454	0.0065586	0.0525006
chr2L	11014180	11014948	769	Peak_1319	238.649	-0.6753	0.248414	0.00655887	0.0525006
chr3L	676403	676791	389	Peak_5310	111.94	-0.912142	0.335506	0.00655375	0.0525006
chr3R	24365821	24366851	1031	Peak_11020	999.455	-0.507303	0.186709	0.00658601	0.052688
chr2R	1780542	1781856	1315	Peak_2578	1083.15	-0.491424	0.181016	0.00663145	0.0529916
chrX	10012893	10013391	499	Peak_12798	181.804	-0.667823	0.245986	0.00662999	0.0529916
chrX	6434027	6434973	947	Peak_12355	603.164	-0.620253	0.228503	0.00663912	0.0530229
chr3R	15144853	15145319	467	Peak_10039	178.828	0.636201	0.234432	0.00665165	0.0530331
chr2L	14273679	14274338	660	Peak_1657	190.914	-0.619748	0.228359	0.00664923	0.0530331
chr3L	4493616	4494066	451	Peak_5855	197.104	-0.737246	0.271631	0.00664464	0.0530331
chr2L	9527447	9528218	772	Peak_1156	209.593	-0.926898	0.341631	0.00666466	0.0531069
chr3R	5934802	5936114	1313	Peak_8964	1061.24	0.421966	0.155565	0.0066783	0.0531856
chr2L	20325987	20326900	914	Peak_2271	257.374	0.692996	0.255543	0.00669069	0.0532543
chr2R	14105694	14107239	1546	Peak_4228	828.996	-0.503607	0.185838	0.00672985	0.0535358
chr3R	1508994	1509433	440	Peak_8408	176.786	-0.693386	0.256001	0.00675832	0.0537018
chr3L	1483882	1485379	1498	Peak_5443	391.495	-0.847904	0.313039	0.00675633	0.0537018
chr3R	20797561	20798227	667	Peak_10690	241.206	-0.797395	0.29446	0.00676922	0.0537583
chr2R	3654941	3655992	1052	Peak_2852	423.497	-0.575096	0.212707	0.00685731	0.0544272
chr3R	26090444	26091710	1267	Peak_11251	422.316	-0.688777	0.254809	0.00686948	0.0544933
chr3L	9342402	9343011	610	Peak_6383	220.826	0.789811	0.29229	0.00688932	0.05462
chr2R	2827448	2827933	486	Peak_2719	249.275	-0.760564	0.281702	0.00693617	0.054938
chr2L	15396509	15396901	393	Peak_1818	126.513	-0.853934	0.31629	0.00693721	0.054938
chr3R	799092	799959	868	Peak_8285	358.633	-0.537948	0.199334	0.00696052	0.0550918
chr3R	20032594	20033108	515	Peak_10606	192.495	-0.571603	0.211913	0.00698947	0.0552899
chr3L	12425407	12426106	700	Peak_6791	598.211	-0.640937	0.237692	0.00700726	0.0553688
chrX	5882145	5882935	791	Peak_12287	344.17	-0.726521	0.269414	0.00700362	0.0553688
chr3L	21681658	21682803	1146	Peak_8019	417.981	-0.691848	0.25662	0.00701766	0.0554199
chr4	251814	252202	389	Peak_11483	180.235	-0.621695	0.230639	0.0070275	0.0554571
chr3L	13200106	13200688	583	Peak_6923	272.806	-0.698016	0.258965	0.00703022	0.0554571
chr2L	18351440	18352021	582	Peak_2025	237.178	-0.824246	0.305847	0.0070396	0.0555002
chr2L	15395262	15395924	663	Peak_1817	254.463	-0.739721	0.27462	0.00706809	0.0556937
chr2L	6722745	6724524	1780	Peak_806	1013.09	0.441303	0.163923	0.00709973	0.0559119
chrX	9825869	9826799	931	Peak_12776	282.766	0.642314	0.238638	0.00711134	0.0559721
chr3R	2796764	2797384	621	Peak_8552	346.948	-0.632796	0.235286	0.00715647	0.0562647
chr2L	10457331	10458014	684	Peak_1270	324.365	-0.713929	0.265452	0.00715614	0.0562647
chr3L	296662	297552	891	Peak_5235	305.131	-0.512712	0.190765	0.00719527	0.0565383
chrX	6177392	6177923	532	Peak_12328	240.66	0.576162	0.214417	0.00720734	0.0566016
chr2L	15415977	15416363	387	Peak_1822	110.215	0.948961	0.353421	0.0072514	0.0569161
chr3R	26581936	26582717	782	Peak_11303	208.681	-0.945431	0.352166	0.00726126	0.0569618
chr2L	21243749	21244654	906	Peak_2390	871.571	-0.502258	0.187174	0.0072884	0.057143
chr2L	15349105	15349754	650	Peak_1801	168.443	-0.853723	0.318187	0.00729463	0.0571602
chr2L	13362953	13363395	443	Peak_1576	255.677	-0.816692	0.304423	0.00730183	0.0571849
chr3L	2084655	2085968	1314	Peak_5518	448.01	-0.679077	0.253158	0.00730899	0.0572092
chr3R	17173300	17173638	339	Peak_10231	152.21	0.744348	0.277598	0.00733181	0.0573561
chr3L	959172	960454	1283	Peak_5373	971.669	-0.485703	0.181169	0.00734172	0.0573701
chr3L	20941926	20945468	3543	Peak_7913	4507.23	-0.557666	0.208005	0.00733984	0.0573701
chr2R	9463437	9464880	1444	Peak_3657	879.386	0.710018	0.264972	0.0073711	0.0575513
chr2R	5722525	5722945	421	Peak_3112	187.809	-0.603754	0.225323	0.00737305	0.0575513
chr2R	13323121	13323579	459	Peak_4125	275.161	0.611434	0.228254	0.0073899	0.057651
chrX	4891317	4892564	1248	Peak_12195	471.903	0.514647	0.192166	0.00740338	0.0576931
chrX	17002689	17003271	583	Peak_13571	550.013	-0.440204	0.16437	0.00740346	0.0576931
chr3R	26106813	26107205	393	Peak_11257	178.641	0.748666	0.279579	0.00741002	0.0577124
chr3R	22719362	22719798	437	Peak_10892	178.627	-0.712024	0.265944	0.00742091	0.0577654
chrX	2919813	2920244	432	Peak_11959	252.573	0.560534	0.209444	0.00744404	0.0578499
chr2L	1426011	1427484	1474	Peak_198	1336.99	-0.474896	0.177436	0.00744095	0.0578499
chr3R	5171738	5172286	549	Peak_8851	219.257	-0.6725	0.251249	0.00743682	0.0578499
chrX	12988064	12988710	647	Peak_13100	407.391	-0.51828	0.193671	0.00744885	0.0578554
chr2L	5886815	5887241	427	Peak_701	147.318	-0.740458	0.276726	0.00745553	0.0578755
chr3R	19613195	19613927	733	Peak_10539	287.047	0.726382	0.271616	0.00748859	0.0580684
chr2R	14706764	14707357	594	Peak_4339	183.763	0.54268	0.20292	0.0074874	0.0580684
chr2R	11545302	11545730	429	Peak_3920	143.22	0.816882	0.305516	0.00750027	0.0581271
chr3R	21340302	21340781	480	Peak_10749	209.357	0.681541	0.254985	0.00752053	0.0582522
chrX	17805209	17805871	663	Peak_13698	800.8	-0.468324	0.175237	0.00752852	0.0582821
chrX	3726062	3726703	642	Peak_12073	210.026	-0.878273	0.328695	0.00754	0.058339
chr2R	11438120	11438616	497	Peak_3912	178.988	-0.655974	0.245583	0.00756051	0.0584657
chr2L	13145296	13145681	386	Peak_1549	145.357	0.777902	0.291315	0.00757798	0.0585676
chr3L	17994550	17995105	556	Peak_7540	292.959	-0.841972	0.315329	0.00758196	0.0585676
chr2R	2424297	2424602	306	Peak_2662	96.08	0.927672	0.347478	0.00759122	0.058575
chr3R	19356496	19356849	354	Peak_10515	161.069	-0.664599	0.248932	0.00758964	0.058575
chr3R	5765687	5766140	454	Peak_8943	96.345	0.867611	0.32512	0.00761717	0.0587112
chr3R	13429444	13429795	352	Peak_9830	132.191	0.827981	0.310252	0.00761375	0.0587112
chr3R	23567066	23567577	512	Peak_10989	185.508	0.81465	0.305333	0.00762879	0.0587687
chr2R	15995131	15995543	413	Peak_4495	100.693	0.851956	0.319374	0.00763995	0.0587906
chr3L	20388532	20388939	408	Peak_7827	169.076	0.75928	0.284627	0.00763871	0.0587906
chr2R	12608619	12609215	597	Peak_4053	388.211	-0.619967	0.23244	0.00764836	0.0587913
chr2R	4299472	4299864	393	Peak_2933	153.164	-0.767228	0.287633	0.00764435	0.0587913
chr2R	10234199	10234729	531	Peak_3763	251.019	-0.557005	0.208877	0.00766067	0.0588219
chr2L	11307683	11308338	656	Peak_1366	336.016	-0.703848	0.263941	0.00766035	0.0588219
chr3R	17291355	17291986	632	Peak_10253	151.443	0.763607	0.286453	0.00768215	0.0589549
chr3L	1440506	1441485	980	Peak_5432	517.597	0.70215	0.263467	0.00769804	0.0590447
chr3R	7515595	7516099	505	Peak_9133	297.594	0.572545	0.214935	0.00772614	0.0592281
chrX	11814828	11815519	692	Peak_13004	457.18	0.556583	0.209046	0.0077565	0.0594286
chrX	3644082	3645709	1628	Peak_12058	1188.32	0.595364	0.223698	0.00778017	0.0595777
chr2L	14559021	14559465	445	Peak_1724	142.078	0.918754	0.345266	0.00779076	0.0595943
chr3L	13260109	13260532	424	Peak_6934	96.2008	-0.91248	0.342893	0.00778811	0.0595943
chrX	6874902	6876208	1307	Peak_12428	663.589	0.414795	0.155933	0.00781209	0.0597251
chrX	18154730	18155342	613	Peak_13724	200.713	0.919124	0.345678	0.00783955	0.0598379
chr2L	22117426	22118153	728	Peak_2481	467.501	-0.510266	0.191905	0.00783849	0.0598379
chr3L	11022768	11023274	507	Peak_6604	148.881	-0.856072	0.321945	0.00783589	0.0598379
chr3R	12065039	12065754	716	Peak_9668	209.549	0.635437	0.239062	0.00785945	0.0599574
chr3L	16043959	16044441	483	Peak_7257	304.532	0.515884	0.194101	0.00786506	0.0599679
chr2R	6659068	6661269	2202	Peak_3248	818.715	-0.75644	0.284697	0.00788397	0.0600797
chrX	16687163	16687623	461	Peak_13540	185.411	0.66327	0.249677	0.00789548	0.060135
chr3R	4716859	4717513	655	Peak_8783	231.674	0.801565	0.301782	0.00790489	0.0601742
chr2L	22108403	22108756	354	Peak_2478	144.461	-0.742913	0.279782	0.00792322	0.0602813
chr2R	8930766	8930974	209	Peak_3600	74.9553	0.976278	0.367725	0.00793286	0.0602897
chr3L	11782044	11783331	1288	Peak_6721	678.542	0.472481	0.177957	0.00793017	0.0602897
chr3L	15109652	15110019	368	Peak_7134	146.814	0.641954	0.241823	0.00793909	0.0603047
chr3R	19271480	19271889	410	Peak_10501	140.426	0.816238	0.307568	0.00795808	0.0604165
chrX	6670786	6673076	2291	Peak_12402	2582.88	-0.472498	0.178064	0.00796532	0.0604389
chr3R	16616795	16617314	520	Peak_10163	239.088	-0.829013	0.312543	0.00799036	0.0605964
chr3R	26666136	26667051	916	Peak_11322	332.369	-1.03751	0.391247	0.00800656	0.0606867
chr3L	14056194	14056423	230	Peak_6997	116.522	0.811756	0.306206	0.00802504	0.0607942
chr2R	20783408	20784135	728	Peak_5135	175.309	-0.965161	0.36439	0.00808005	0.0611781
chr3R	22310384	22311065	682	Peak_10857	362.463	-0.537574	0.203028	0.00810217	0.0613128
chrX	19740844	19741707	864	Peak_13962	275.516	-0.86377	0.326304	0.00811773	0.0613977
chr2L	4129195	4129640	446	Peak_509	82.3551	-0.992688	0.375117	0.00813676	0.0615087
chr2R	15964013	15964737	725	Peak_4487	390.734	-0.545533	0.206225	0.00816112	0.0616598
chr3L	21899555	21900251	697	Peak_8061	271.501	-0.920496	0.348112	0.00818712	0.0618232
chr3L	19667687	19668250	564	Peak_7748	239.226	-0.756674	0.286179	0.00819175	0.0618252
chr2R	14813746	14814693	948	Peak_4360	333.274	0.801482	0.303253	0.00821877	0.0619961
chr3L	16889460	16889844	385	Peak_7399	140.349	0.717958	0.271827	0.00826059	0.0622783
chrX	7826915	7827896	982	Peak_12541	511.923	0.546444	0.206926	0.00827176	0.0623292
chrX	13138275	13139150	876	Peak_13123	213.473	-0.804981	0.304867	0.0082799	0.0623573
chr2L	8846539	8847380	842	Peak_1087	725.441	-0.604541	0.228973	0.00828503	0.0623627
chr3L	3551442	3551890	449	Peak_5719	186.085	-0.810159	0.306881	0.00829118	0.0623758
chr2L	9988589	9990262	1674	Peak_1218	1079.14	-0.517444	0.196059	0.00830952	0.0624806
chrX	11321269	11321545	277	Peak_12925	90.1325	0.736105	0.279024	0.00833623	0.0625189
chrX	17265521	17265743	223	Peak_13608	96.3769	0.665457	0.252226	0.00833139	0.0625189
chr2L	9657397	9657686	290	Peak_1166	104.799	0.622417	0.235932	0.00833674	0.0625189
chr2R	1383838	1384540	703	Peak_2546	608.669	-0.535453	0.202954	0.00833232	0.0625189
chr2L	14569569	14570092	524	Peak_1728	188.67	-0.727346	0.275672	0.00832875	0.0625189
chr2R	19099408	19100658	1251	Peak_4888	427.029	0.737802	0.279764	0.00835853	0.0626491
chr3R	17478490	17478909	420	Peak_10294	240.23	0.567176	0.215104	0.00837029	0.062704
chr2R	14534152	14535040	889	Peak_4315	457.5	-0.694656	0.263475	0.00837624	0.0627153
chr3R	11961458	11961992	535	Peak_9639	149.657	-0.885512	0.335956	0.00839401	0.0627819
chr3L	8004651	8004950	300	Peak_6211	65.0281	-0.973444	0.369308	0.00839243	0.0627819
chr3R	12009835	12010196	362	Peak_9647	106.359	-0.807258	0.306301	0.00840111	0.0628017
chrX	605359	606192	834	Peak_11635	701.611	-0.41908	0.159069	0.00842424	0.0629287
chr2L	11196733	11197208	476	Peak_1352	255.256	-0.736707	0.279642	0.00842699	0.0629287
chr2L	8574548	8575498	951	Peak_1069	462.493	-0.521563	0.198012	0.00843876	0.0629833
chr3L	18806994	18807719	726	Peak_7644	317.784	-0.693819	0.263466	0.00845268	0.0630539
chr2L	5974097	5974379	283	Peak_709	113.424	0.693362	0.263319	0.00845929	0.0630699
chr3R	9830704	9831220	517	Peak_9382	238.155	0.938542	0.356603	0.00849089	0.0630985
chr3L	6126546	6126819	274	Peak_5988	103.35	0.876181	0.332927	0.00849458	0.0630985
chr2L	14672530	14672889	360	Peak_1753	116.532	0.8755	0.33269	0.00849883	0.0630985
chr3R	10336987	10337650	664	Peak_9457	442.595	0.472377	0.179458	0.00848239	0.0630985
chr3L	2472220	2472880	661	Peak_5556	369.3	-0.5449	0.207022	0.00848627	0.0630985
chr3L	2805424	2806399	976	Peak_5590	473.568	-0.701647	0.26662	0.00849744	0.0630985
chrX	1124347	1125042	696	Peak_11695	234.48	-0.759553	0.288578	0.00848692	0.0630985
chr3L	286119	286513	395	Peak_5233	121.475	-0.832872	0.316489	0.00849837	0.0630985
chr2R	12226351	12226745	395	Peak_4022	152.178	-0.747335	0.284024	0.00850733	0.0631284
chr3R	9763864	9765111	1248	Peak_9367	934.449	-0.665481	0.25301	0.00853215	0.0632793
chr2L	18516641	18517861	1221	Peak_2048	1281.26	-0.443907	0.168865	0.00856938	0.0635197
chrX	20361450	20362097	648	Peak_14006	267.591	-0.790178	0.30061	0.00857411	0.0635197
chr3L	4400409	4400990	582	Peak_5844	174.111	-0.940451	0.3578	0.00857803	0.0635197
chr3R	5051820	5052316	497	Peak_8832	439.534	-0.487071	0.185336	0.00858794	0.0635597
chr3L	10701913	10703537	1625	Peak_6528	499.665	-0.699404	0.266162	0.00859549	0.0635823
chrX	9364098	9364485	388	Peak_12723	153.719	0.620701	0.236409	0.00865129	0.0639504
chr2L	18311570	18313249	1680	Peak_2018	2034.26	-0.484897	0.184698	0.00865593	0.0639504
chr3R	1128591	1129091	501	Peak_8353	194.982	-0.70237	0.267549	0.00865973	0.0639504
chr2R	1952797	1954025	1229	Peak_2595	343.874	-0.789841	0.300885	0.00866334	0.0639504
chr3L	20625094	20625583	490	Peak_7870	166.629	0.908012	0.345944	0.00867167	0.0639785
chr3R	9622142	9623060	919	Peak_9339	559.284	-0.609102	0.232118	0.00868766	0.064063
chr3L	647053	647567	515	Peak_5301	214.458	0.677411	0.258174	0.00869399	0.0640763
chrX	19793402	19794244	843	Peak_13975	182.138	-0.833903	0.317882	0.00870806	0.0641465
chr2R	9809024	9809667	644	Peak_3684	312.353	-0.618352	0.235801	0.00873271	0.0642946
chr3L	6366644	6367087	444	Peak_6030	126.511	0.832966	0.31771	0.00874719	0.0643677
chrX	8301673	8301971	299	Peak_12594	153.736	0.672308	0.25647	0.00875729	0.0643885
chr2R	2461059	2461490	432	Peak_2673	158.132	-0.665596	0.253917	0.00875914	0.0643885
chr2L	14506600	14507495	896	Peak_1703	444.885	-0.795912	0.303722	0.00877937	0.0644737
chr3L	21876166	21876821	656	Peak_8056	184.034	-0.87799	0.335046	0.00877984	0.0644737
chr3R	11651279	11651836	558	Peak_9601	153.873	-0.743005	0.283575	0.0087895	0.0645111
chr3R	19218018	19218471	454	Peak_10496	137.318	0.746856	0.285067	0.00879464	0.0645153
chr3R	10533658	10533971	314	Peak_9479	100.72	0.859596	0.328141	0.00880349	0.0645467
chr2L	4053598	4054577	980	Peak_505	612.816	-0.536656	0.204928	0.00882518	0.0646722
chr3L	1886163	1886637	475	Peak_5501	191.834	-0.6041	0.230874	0.00888171	0.0650528
chr2L	1688243	1688576	334	Peak_241	150.307	0.949172	0.363045	0.00893651	0.0653188
chrX	2429243	2429822	580	Peak_11897	225.442	0.866085	0.331242	0.00893156	0.0653188
chr3L	16806916	16807332	417	Peak_7382	125.41	0.652071	0.249404	0.00893535	0.0653188
chr3L	4351831	4352290	460	Peak_5835	181.312	-0.881281	0.337075	0.0089359	0.0653188
chr2L	21954750	21955467	718	Peak_2469	330.456	-0.694838	0.265811	0.00894804	0.0653692
chrX	19682051	19683122	1072	Peak_13958	464.664	-0.57262	0.219087	0.00895748	0.0654044
chr2L	110129	110475	347	Peak_22	126.636	0.924527	0.353868	0.00898481	0.0655701
chr2L	5151098	5151860	763	Peak_623	305.657	0.557662	0.213528	0.00901039	0.065689
chrX	13888808	13889529	722	Peak_13230	979.338	-0.602657	0.230746	0.00900733	0.065689
chr2R	3796508	3797397	890	Peak_2865	440.991	-0.500278	0.191681	0.00905557	0.0659843
chr2L	5251300	5254896	3597	Peak_638	3734.63	-0.514651	0.197302	0.00909553	0.0662072
chrX	1501041	1501646	606	Peak_11751	177.749	-0.869493	0.333334	0.00909462	0.0662072
chr3L	4352529	4353439	911	Peak_5836	356.158	-0.757613	0.290585	0.00912865	0.0664141
chr3L	18888075	18888480	406	Peak_7660	139.053	0.900875	0.345587	0.00913939	0.0664538
chr3L	16794524	16795530	1007	Peak_7376	658.247	0.657494	0.252255	0.00914821	0.0664538
chr3L	14629531	14630558	1028	Peak_7087	788.858	-0.445645	0.170967	0.00914435	0.0664538
chr3R	7638481	7639074	594	Peak_9147	212.475	0.56392	0.216382	0.00915713	0.0664844
chr3R	17683058	17683940	883	Peak_10327	373.897	0.68944	0.264617	0.00917587	0.066518
chr3R	12327488	12327849	362	Peak_9726	135.064	-0.676541	0.259649	0.00917137	0.066518
chr2L	1069279	1069753	475	Peak_167	130.844	-0.95755	0.367497	0.00917141	0.066518
chrX	18760308	18760912	605	Peak_13809	301.385	-0.664017	0.254919	0.00919253	0.0666046
chr3R	20092357	20093529	1173	Peak_10616	1098.93	-0.408681	0.156935	0.00921047	0.0667004
chr3L	166823	167403	581	Peak_5204	237.04	0.639815	0.245729	0.00922108	0.0667431
chr2L	3416816	3417840	1025	Peak_420	371.796	-0.613591	0.235721	0.00924005	0.0668461
chr2R	3173158	3173660	503	Peak_2770	333.019	0.796062	0.305875	0.00925279	0.066904
chr2R	3869756	3870183	428	Peak_2875	135.102	0.811939	0.312104	0.00928164	0.0670434
chr4	1263986	1264388	403	Peak_11564	137.843	0.754142	0.289906	0.00928629	0.0670434
chr3R	15075110	15075718	609	Peak_10016	189.7	-0.861375	0.331086	0.00927736	0.0670434
chr2L	9906933	9908061	1129	Peak_1198	610.045	0.644212	0.247791	0.00932726	0.0671341
chr2R	15349525	15351375	1851	Peak_4414	1705.99	0.423782	0.163004	0.00932735	0.0671341
chr3R	3816130	3817657	1528	Peak_8655	500.854	-0.506198	0.194697	0.00932444	0.0671341
chr2R	19130106	19130812	707	Peak_4895	401.41	-0.641476	0.246734	0.00932597	0.0671341
chrX	278747	279133	387	Peak_11597	169.07	-0.67875	0.261073	0.00932652	0.0671341
chr3L	16632134	16632510	377	Peak_7351	156.125	-0.705863	0.271453	0.00931385	0.0671341
chrX	21916487	21917232	746	Peak_14108	471.017	-0.532912	0.205012	0.00933807	0.0671771
chr3R	6500874	6501182	309	Peak_9050	96.6893	0.889559	0.342304	0.00935679	0.0672775
chr3R	17387266	17387622	357	Peak_10262	107.237	0.797492	0.307075	0.00940245	0.0675714
chr3L	6372671	6373225	555	Peak_6033	138.994	0.871823	0.335772	0.00941856	0.0676493
chrX	16826364	16826809	446	Peak_13558	140.821	-0.956883	0.368554	0.00942285	0.0676493
chr2L	517809	518981	1173	Peak_89	369.892	-0.556023	0.214234	0.00944797	0.0677952
chr2L	8857664	8858268	605	Peak_1089	200.421	0.802541	0.309248	0.00945543	0.0678143
chrX	19206942	19207842	901	Peak_13873	348.77	-0.673837	0.259735	0.0094776	0.0679388
chr3L	13929050	13929504	455	Peak_6973	156.986	-0.587759	0.226612	0.00949558	0.0680059
chr2R	10353969	10354842	874	Peak_3780	361.791	-0.638336	0.246116	0.00949658	0.0680059
chr2R	8829980	8830886	907	Peak_3573	570.986	-0.577696	0.222841	0.00953066	0.0682154
chr2L	9120640	9121252	613	Peak_1108	222.059	0.697933	0.269291	0.00954899	0.068312
chr2L	21950055	21950483	429	Peak_2468	149.727	-0.663527	0.256177	0.00959441	0.0686022
chr2R	20438482	20439178	697	Peak_5083	228.592	0.682167	0.263478	0.00962323	0.0687735
chr3L	16189669	16190268	600	Peak_7289	244.254	-0.715612	0.276439	0.0096345	0.0688192
chr2L	19910919	19911524	606	Peak_2226	149.128	-0.858282	0.331663	0.0096588	0.068958
chr3R	4013118	4013870	753	Peak_8690	248.779	0.716637	0.276955	0.00966596	0.0689743
chr2L	21019055	21020342	1288	Peak_2355	2439.51	-0.561619	0.217079	0.00967707	0.0690187
chr3L	22364774	22365300	527	Peak_8102	203.725	-0.667515	0.258117	0.00970693	0.0691968
chr3R	5076319	5076834	516	Peak_8841	191.589	-0.800038	0.30941	0.00971859	0.0692449
chrX	19499030	19500303	1274	Peak_13915	846.644	0.423278	0.16383	0.00977654	0.069591
chr3L	13090706	13091756	1051	Peak_6907	491.461	-0.583773	0.225952	0.009777	0.069591
chr2L	8291985	8292822	838	Peak_1016	468.836	0.651052	0.252053	0.00979449	0.0696453
chr2L	14515882	14516754	873	Peak_1708	577.263	-0.637566	0.246822	0.0097917	0.0696453
chr2R	14833957	14835083	1127	Peak_4365	1162.2	0.427961	0.165706	0.00980449	0.0696814
chr3L	17596989	17597338	350	Peak_7483	98.8776	0.9507	0.368149	0.00981219	0.0697011
chr3R	25654636	25655578	943	Peak_11190	798.48	-0.447498	0.173307	0.00981966	0.0697191
chr2R	8902158	8902564	407	Peak_3591	156.742	0.755417	0.292639	0.00984025	0.0698041
chr2R	1699483	1700144	662	Peak_2575	214.797	-0.618902	0.239759	0.00984151	0.0698041
chr3R	1447470	1448208	739	Peak_8396	231.094	-0.831802	0.322275	0.00985063	0.0698337
chr2L	14621291	14621575	285	Peak_1741	110.116	0.728755	0.282402	0.00986402	0.0698936
chr2R	8150175	8150669	495	Peak_3487	152.795	0.676623	0.262272	0.00988434	0.0700025
chrX	8427791	8428420	630	Peak_12611	312.393	0.788464	0.305657	0.00989222	0.0700232
chr3R	24150563	24150945	383	Peak_11010	219.118	-0.55037	0.213433	0.0099187	0.0701404
[truncated: 364 more rows]
