# Supplementary material for: Damage-responsive, maturity-silenced enhancers regulate multiple genes that direct regeneration in Drosophila
Source: eLife. 2020 Jun 3;9:e58305. doi: 10.7554/eLife.58305 (PMC7299344; doi:10.7554/eLife.58305)
Supplement: Supplementary file 2. — Also shown are peaks categorized as damage-responsive in old discs (above cutoffs in old undamaged vs. old damaged) for completeness. Peak attributes and comparison values are shown as in Supplementary file 1. [file elife-58305-supp2.xlsx]

## Sheet: EL3 Damage responsive (DR) 
	Peak Attributes						Young Undamaged vs. Young Damaged
Rank	Chr	Start	End	Width	Peak ID	BaseMean	log2 Fold Change	Standard Error	P Value	Adjusted P Value
1	chr3R	19918346	19919176	831	Peak_10588	504.893	-1.30234	0.278672	2.96289e-06	0.00206884
2	chr3L	8029483	8030257	775	Peak_6216	310.852	-1.22154	0.296559	3.80465e-05	0.0090728
3	chrX	18136983	18138248	1266	Peak_13716	987.55	-1.18251	0.250471	2.34513e-06	0.00206884
4	chr2R	2569231	2570294	1064	Peak_2697	637.497	-1.14027	0.315556	0.000302061	0.024773
5	chr2R	19460551	19461404	854	Peak_4931	391.2	-1.12674	0.260739	1.55099e-05	0.00519829
6	chr3L	18750108	18750734	627	Peak_7631	332.456	-1.12512	0.333087	0.000730532	0.0422147
7	chr2L	12404285	12404977	693	Peak_1457	433.031	-1.12479	0.2777	5.1132e-05	0.0112746
8	chrX	9534737	9535581	845	Peak_12747	320.901	-1.11724	0.282166	7.50996e-05	0.0136453
9	chr3L	2566658	2567756	1099	Peak_5569	744.909	-1.1092	0.280457	7.65398e-05	0.0136453
10	chrX	4317789	4318509	721	Peak_12130	440.923	-1.07187	0.275297	9.88042e-05	0.016592
11	chrX	6768914	6769458	545	Peak_12422	450.536	-1.0362	0.285231	0.000280322	0.0246726
12	chrX	20041420	20042328	909	Peak_13977	250.17	-1.02107	0.316271	0.00124459	0.0610756
13	chr3R	4781014	4781584	571	Peak_8795	429.807	-1.02035	0.281712	0.000292381	0.0246726
14	chrX	18202975	18203962	988	Peak_13736	1670.14	-1.00406	0.266473	0.000164584	0.019637
15	chr3R	17029537	17030200	664	Peak_10212	307.765	-1.00128	0.275287	0.000275616	0.0246726
16	chr2L	20242569	20243072	504	Peak_2266	287.416	-0.996086	0.269786	0.000222385	0.021922
17	chr2L	16612613	16613445	833	Peak_1914	343.701	-0.987678	0.281622	0.000453003	0.0308595
18	chr3R	8293470	8293857	388	Peak_9232	341.378	-0.977747	0.269058	0.000279092	0.0246726
19	chr2L	17702229	17702929	701	Peak_1984	380.721	-0.974047	0.214553	5.62814e-06	0.0026199
20	chr2R	20276897	20277416	520	Peak_5070	279.406	-0.962954	0.249628	0.000114522	0.0171354
21	chrX	12981403	12981905	503	Peak_13097	305.404	-0.95321	0.257902	0.000219014	0.021922
22	chr3L	7821027	7821628	602	Peak_6184	325.817	-0.943484	0.196916	1.65702e-06	0.00193395
23	chrX	5454399	5455091	693	Peak_12239	1179.94	-0.937358	0.298425	0.00168361	0.070535
24	chr2L	14418657	14419390	734	Peak_1681	483.242	-0.929222	0.281593	0.000967283	0.0516233
25	chrX	9539749	9541488	1740	Peak_12748	1017.03	-0.925631	0.244998	0.000158024	0.0195893
26	chr2L	3090311	3090852	542	Peak_397	414.862	-0.92198	0.219286	2.61699e-05	0.00756129
27	chr3R	10957185	10957893	709	Peak_9517	881.519	-0.92196	0.202886	5.51358e-06	0.0026199
28	chr3L	11003317	11004212	896	Peak_6602	1187.68	-0.919177	0.239752	0.000126143	0.0173456
29	chr2R	16801177	16802110	934	Peak_4580	1179	-0.918474	0.219356	2.8249e-05	0.00788994
30	chrX	10239842	10240396	555	Peak_12813	254.972	-0.898192	0.284634	0.00160164	0.0677784
31	chr3R	26352564	26353548	985	Peak_11289	624.817	-0.897956	0.160531	2.22337e-08	6.20987e-05
32	chr2L	5403395	5404113	719	Peak_658	1102.86	-0.894106	0.239513	0.000189206	0.0208599
33	chr3R	5705347	5706627	1281	Peak_8933	799.763	-0.893656	0.28873	0.00196725	0.0754753
34	chrX	11027981	11028686	706	Peak_12902	280.888	-0.888523	0.283222	0.00170571	0.0707533
35	chrX	19439971	19441103	1133	Peak_13907	840.25	-0.887101	0.219989	5.51911e-05	0.0118576
36	chr3R	1638855	1639939	1085	Peak_8422	726.696	-0.883492	0.303293	0.00357973	0.0950924
37	chr3R	8889572	8890465	894	Peak_9268	1465.13	-0.880383	0.274253	0.00132681	0.0625291
38	chr3R	21009960	21010921	962	Peak_10719	993.975	-0.878763	0.191554	4.48496e-06	0.00234872
39	chrX	17572272	17573062	791	Peak_13649	289.046	-0.875807	0.236183	0.00020876	0.0213318
40	chr2L	18795839	18796832	994	Peak_2089	1100.84	-0.875218	0.231971	0.000161315	0.0195893
41	chr2L	4626921	4627999	1079	Peak_561	426.044	-0.875124	0.279506	0.0017423	0.0710201
42	chr3R	7905509	7905991	483	Peak_9186	260.319	-0.8742	0.288089	0.00240957	0.0801182
43	chr3L	18764182	18765278	1097	Peak_7638	999.719	-0.870413	0.226074	0.000118059	0.0173456
44	chr2L	11445410	11446590	1181	Peak_1396	2180.05	-0.867214	0.224732	0.000113908	0.0171354
45	chrX	19243084	19243614	531	Peak_13881	364.136	-0.865266	0.258383	0.000811712	0.0453422
46	chr3R	12655675	12656175	501	Peak_9764	501.51	-0.859953	0.243839	0.000420742	0.0293448
47	chr3R	10172448	10173117	670	Peak_9421	609.136	-0.857918	0.224833	0.000135743	0.0176399
48	chrX	16419606	16420622	1017	Peak_13494	476.878	-0.855744	0.238816	0.000339316	0.0258466
49	chr3R	9843260	9843857	598	Peak_9386	404.132	-0.85333	0.206531	3.60042e-05	0.00887292
50	chr3L	11421415	11421886	472	Peak_6679	325.185	-0.8387	0.246739	0.000675998	0.0396914
51	chr2L	1642992	1643992	1001	Peak_231	952.503	-0.827853	0.183976	6.80233e-06	0.00299983
52	chr3R	12589328	12590185	858	Peak_9759	1536.52	-0.82738	0.23473	0.000423765	0.0293448
53	chr2R	5816978	5817736	759	Peak_3126	574.102	-0.82252	0.27561	0.00284175	0.0856512
54	chrX	1718246	1719191	946	Peak_11768	901.111	-0.820038	0.267843	0.00220129	0.0769812
55	chr2R	2932362	2933974	1613	Peak_2732	859.055	-0.817898	0.265133	0.00203647	0.076814
56	chrX	3664834	3665588	755	Peak_12062	394.66	-0.815404	0.213994	0.000138738	0.0176399
57	chr3L	14124347	14125167	821	Peak_7005	963.903	-0.815044	0.195817	3.15086e-05	0.00800031
58	chr2L	12617625	12618939	1315	Peak_1496	1752	-0.814003	0.221712	0.000241183	0.0229644
59	chr2R	8929449	8930072	624	Peak_3599	706.626	-0.813421	0.223456	0.000272445	0.0246726
60	chr3L	20614569	20615490	922	Peak_7869	2250.62	-0.809354	0.215415	0.000171837	0.0199364
61	chrX	7498409	7499117	709	Peak_12498	1192.61	-0.808894	0.249494	0.00118637	0.060269
62	chr2L	8424699	8425349	651	Peak_1042	304.311	-0.808568	0.270103	0.00275746	0.0843239
63	chrX	589845	590424	580	Peak_11631	299.108	-0.806084	0.277117	0.00362798	0.0955937
64	chrX	8107698	8108678	981	Peak_12577	1408.96	-0.80255	0.22238	0.000307482	0.024773
65	chr2L	3538497	3540391	1895	Peak_436	2175.01	-0.800107	0.18735	1.94901e-05	0.00583241
66	chr3L	377158	378607	1450	Peak_5247	2310.82	-0.799639	0.250085	0.00138642	0.0638393
67	chr3L	20096923	20097678	756	Peak_7799	554.972	-0.795845	0.223896	0.000378655	0.0283282
68	chr2R	15156251	15156789	539	Peak_4391	496.153	-0.786878	0.224678	0.000461348	0.0309233
69	chr3R	17683058	17683940	883	Peak_10327	373.897	-0.781558	0.26752	0.00348356	0.0943299
70	chr2R	7487322	7488115	794	Peak_3380	488.644	-0.780592	0.246487	0.00154091	0.0662312
71	chrX	4305264	4305928	665	Peak_12127	1214.07	-0.777262	0.221118	0.000439516	0.0301861
72	chrX	8700496	8701112	617	Peak_12644	726.782	-0.775498	0.226587	0.000620438	0.0379464
73	chrX	16041506	16042522	1017	Peak_13446	1202.57	-0.773915	0.21578	0.000335025	0.0258466
74	chr3L	18751895	18752795	901	Peak_7632	1454.55	-0.773612	0.208199	0.000202609	0.0211829
75	chr2R	5842169	5843174	1006	Peak_3132	1104.95	-0.772144	0.245003	0.00162397	0.0683782
76	chr3R	12672883	12673381	499	Peak_9765	500.062	-0.77079	0.260458	0.00308272	0.0893056
77	chr2L	21618625	21619307	683	Peak_2415	286.454	-0.770219	0.237351	0.00117424	0.060269
78	chr2R	5276898	5277814	917	Peak_3060	385.704	-0.767321	0.173653	9.92979e-06	0.00361747
79	chr3R	4484397	4484906	510	Peak_8742	294.83	-0.765324	0.224236	0.000642453	0.0384543
80	chrX	9623034	9623748	715	Peak_12759	956.724	-0.762581	0.24637	0.00196638	0.0754753
81	chr2L	9567432	9567960	529	Peak_1158	436.383	-0.761816	0.239861	0.00149282	0.0655137
82	chr3L	14699481	14700079	599	Peak_7096	768.904	-0.754535	0.245827	0.00214507	0.0769812
83	chr3R	6439815	6440894	1080	Peak_9034	2618.55	-0.754186	0.246696	0.00223454	0.0769812
84	chrX	4940293	4941595	1303	Peak_12210	2121.94	-0.753394	0.202273	0.000195594	0.0210113
85	chr3R	14275856	14276432	577	Peak_9923	446.804	-0.752892	0.189036	6.811e-05	0.0132719
86	chr2R	1578553	1579866	1314	Peak_2554	1542.76	-0.746325	0.244433	0.00226351	0.077412
87	chrX	4089248	4089831	584	Peak_12109	264.537	-0.745898	0.246306	0.00245901	0.080578
88	chr2L	20120813	20121429	617	Peak_2260	447.147	-0.743751	0.257872	0.00392422	0.0978603
89	chr2L	3579743	3581268	1526	Peak_449	1606.8	-0.743707	0.259343	0.00413528	0.0989911
90	chrX	13884390	13885255	866	Peak_13229	784.746	-0.738715	0.236191	0.00176231	0.0710201
91	chr3L	18022571	18023072	502	Peak_7552	399.384	-0.737301	0.219434	0.000779374	0.0446541
92	chr3L	13221412	13222187	776	Peak_6928	1172.86	-0.735232	0.203926	0.000311686	0.0248725
93	chrX	4320578	4321356	779	Peak_12132	1864	-0.734445	0.212039	0.000532758	0.033818
94	chr2R	13709495	13710358	864	Peak_4186	1081.56	-0.733827	0.202707	0.000294458	0.0246726
95	chr3L	21272907	21273527	621	Peak_7967	250.614	-0.732216	0.237477	0.00204713	0.076814
96	chr3R	8198307	8199062	756	Peak_9214	397.456	-0.729897	0.254748	0.00416776	0.0989911
97	chr2R	6505682	6506283	602	Peak_3237	462.075	-0.727138	0.190225	0.000132097	0.0175689
98	chr2R	9844793	9845921	1129	Peak_3695	1195.38	-0.72696	0.188285	0.000112946	0.0171354
99	chr3L	17599800	17600373	574	Peak_7484	354.369	-0.725624	0.219767	0.000960691	0.0516002
100	chrX	8544478	8545613	1136	Peak_12622	2118.45	-0.723252	0.228911	0.00158018	0.0672099
101	chr3R	5046044	5046497	454	Peak_8831	299.055	-0.722053	0.251702	0.00412185	0.0989598
102	chrX	16042947	16043515	569	Peak_13447	722.965	-0.721819	0.230358	0.00172751	0.0710201
103	chr3R	10108990	10110202	1213	Peak_9411	974.525	-0.719465	0.203141	0.000397545	0.0292316
104	chr2L	14094621	14095016	396	Peak_1642	253.005	-0.716098	0.244621	0.00341832	0.0943299
105	chr3R	9638295	9638990	696	Peak_9342	841.553	-0.712681	0.240354	0.00302561	0.0887207
106	chr2R	20701100	20701646	547	Peak_5121	558.469	-0.709657	0.239784	0.00308068	0.0893056
107	chr2R	10368254	10370363	2110	Peak_3782	1638.49	-0.704788	0.147769	1.84647e-06	0.00193395
108	chr2R	7524755	7525448	694	Peak_3393	476.34	-0.704499	0.218712	0.0012769	0.0616115
109	chr2L	3825353	3825768	416	Peak_486	325.997	-0.70388	0.24324	0.00380647	0.0975301
110	chr3L	881682	882356	675	Peak_5370	289.61	-0.70239	0.218828	0.00132834	0.0625291
111	chrX	3671127	3671698	572	Peak_12065	409.753	-0.701999	0.198595	0.000408047	0.0292316
112	chr3R	12145832	12146524	693	Peak_9694	525.769	-0.697336	0.238835	0.00350325	0.0943299
113	chr3L	10668821	10669294	474	Peak_6518	282.65	-0.694667	0.236955	0.00337175	0.0943299
114	chr4	527373	529487	2115	Peak_11509	3540.42	-0.69416	0.191377	0.000286529	0.0246726
115	chr2R	16771896	16772441	546	Peak_4577	609.547	-0.693622	0.226431	0.00218926	0.0769812
116	chr2R	17500213	17500877	665	Peak_4684	358.909	-0.693268	0.173491	6.44263e-05	0.012853
117	chr2R	8903011	8903622	612	Peak_3592	628.272	-0.68966	0.2158	0.00139427	0.0638393
118	chr3L	14170511	14171398	888	Peak_7011	1395.62	-0.685442	0.237231	0.00386055	0.0975301
119	chr2L	12854433	12854932	500	Peak_1523	370.584	-0.685262	0.195895	0.000468568	0.0309233
120	chr3L	5177221	5178523	1303	Peak_5904	1323.51	-0.683974	0.190824	0.00033796	0.0258466
121	chr3L	8442788	8443567	780	Peak_6272	534.51	-0.682057	0.192958	0.000408175	0.0292316
122	chrX	17662019	17662669	651	Peak_13671	1064.12	-0.681181	0.227898	0.0027992	0.085289
123	chr2R	1976466	1977057	592	Peak_2598	386.427	-0.679828	0.221218	0.00211834	0.0769812
124	chr3R	10111768	10112818	1051	Peak_9412	954.409	-0.675113	0.201011	0.000783405	0.0446541
125	chr3R	22286899	22288238	1340	Peak_10855	670.433	-0.674736	0.161891	3.07513e-05	0.00800031
126	chrX	4318811	4319673	863	Peak_12131	1669.91	-0.672943	0.211551	0.00146767	0.0655137
127	chr3R	27514711	27515574	864	Peak_11410	1133.14	-0.670558	0.215104	0.00182478	0.0724635
128	chrX	19254972	19255679	708	Peak_13885	929.939	-0.670369	0.151176	9.23466e-06	0.00351715
129	chr3R	19026704	19027347	644	Peak_10466	1093.49	-0.670043	0.201988	0.000909097	0.050114
130	chr2L	3606329	3607243	915	Peak_458	1373.26	-0.669651	0.21566	0.00190196	0.0748195
131	chr2L	16422560	16423235	676	Peak_1881	641.971	-0.668611	0.22012	0.00238561	0.0796374
132	chr2R	6046916	6047954	1039	Peak_3174	1235.95	-0.667796	0.167969	7.01725e-05	0.0133631
133	chr2L	552207	553784	1578	Peak_101	1695.95	-0.667572	0.183588	0.000276643	0.0246726
134	chr3R	3605367	3606431	1065	Peak_8634	793.27	-0.665869	0.195926	0.000677392	0.0396914
135	chr3L	5623550	5624219	670	Peak_5938	940.722	-0.664377	0.201073	0.00095262	0.0514968
136	chr2R	13149125	13150796	1672	Peak_4112	3574.69	-0.663155	0.197942	0.00080738	0.0453422
137	chr3L	3034974	3035760	787	Peak_5617	505.086	-0.657832	0.214178	0.00213037	0.0769812
138	chr2L	12545777	12546891	1115	Peak_1485	922.95	-0.657449	0.217726	0.00253089	0.0815629
139	chr3R	9700447	9701242	796	Peak_9355	1433.87	-0.655035	0.213171	0.00212049	0.0769812
140	chr3R	21561255	21561782	528	Peak_10779	308.948	-0.654053	0.220668	0.00303693	0.0887207
141	chr2R	11684688	11685572	885	Peak_3934	354.429	-0.653319	0.204789	0.00142173	0.0642675
142	chr3L	12460908	12461660	753	Peak_6800	1367.55	-0.651655	0.216769	0.0026452	0.0839552
143	chrX	16806951	16807650	700	Peak_13555	567.561	-0.651119	0.210114	0.00194247	0.0753518
144	chr2R	6115279	6115957	679	Peak_3183	943.16	-0.650979	0.187407	0.000513524	0.0330986
145	chrX	5906513	5907899	1387	Peak_12300	1537.51	-0.649871	0.157987	3.89809e-05	0.0090728
146	chrX	7585762	7586994	1233	Peak_12510	761.104	-0.649581	0.207599	0.00175395	0.0710201
147	chrX	8785108	8786171	1064	Peak_12655	1398.61	-0.6477	0.178536	0.000285796	0.0246726
148	chr3L	11480312	11481132	821	Peak_6685	575.347	-0.645561	0.210477	0.00216121	0.0769812
149	chrX	1127800	1128575	776	Peak_11697	807.675	-0.644982	0.200239	0.00127719	0.0616115
150	chr2R	11989924	11992636	2713	Peak_3983	2251.9	-0.644285	0.182501	0.000415071	0.0293448
151	chrX	18206403	18207226	824	Peak_13737	1712.72	-0.642232	0.215026	0.00281947	0.0855955
152	chr3L	2808046	2809045	1000	Peak_5592	1039.85	-0.64162	0.197914	0.00118727	0.060269
153	chrX	1942870	1944966	2097	Peak_11811	2247.13	-0.641201	0.213417	0.00266059	0.0840522
154	chr3R	6442318	6443214	897	Peak_9035	1342.27	-0.640962	0.210858	0.00236754	0.0796374
155	chr2R	3609972	3610909	938	Peak_2839	1057.87	-0.636611	0.171378	0.000203478	0.0211829
156	chr2L	547932	549063	1132	Peak_100	806.656	-0.633378	0.216558	0.0034474	0.0943299
157	chrX	3055631	3057423	1793	Peak_11987	4059.93	-0.630257	0.216209	0.0035564	0.0949016
158	chrX	18586709	18587561	853	Peak_13786	454.701	-0.628094	0.204814	0.00216463	0.0769812
159	chr3L	2576665	2577662	998	Peak_5571	439.556	-0.627879	0.219025	0.00414779	0.0989911
160	chrX	10451057	10451986	930	Peak_12834	1093.4	-0.627506	0.218241	0.00403664	0.0980653
161	chr3R	10522299	10523313	1015	Peak_9478	928.109	-0.626127	0.17455	0.000334377	0.0258466
162	chr3R	25597143	25598109	967	Peak_11175	1606.03	-0.62342	0.205886	0.00246186	0.080578
163	chr4	1000293	1001106	814	Peak_11545	571.11	-0.623279	0.20969	0.00295492	0.087799
164	chr3R	24410885	24411844	960	Peak_11024	1101.27	-0.622121	0.207188	0.00267614	0.0840522
165	chr3L	4825355	4826079	725	Peak_5887	784.638	-0.62089	0.200189	0.00192532	0.0753518
166	chr2L	7495257	7496618	1362	Peak_912	1394.57	-0.619724	0.205023	0.00250532	0.0814044
167	chr3L	1007617	1008377	761	Peak_5375	296.703	-0.619039	0.208868	0.00303889	0.0887207
168	chr3R	12528446	12529138	693	Peak_9752	1100.11	-0.614446	0.21208	0.00376466	0.0972917
169	chr3L	10729750	10730900	1151	Peak_6534	2041.77	-0.61387	0.197254	0.00185779	0.0734265
170	chr3R	10198484	10199667	1184	Peak_9428	877.143	-0.611769	0.20678	0.0030909	0.0893056
171	chr3L	10764409	10766380	1972	Peak_6544	1579.12	-0.610326	0.204995	0.00290816	0.086717
172	chrX	7501906	7502757	852	Peak_12500	1158.71	-0.609856	0.208453	0.00343759	0.0943299
173	chr3R	22014278	22014865	588	Peak_10839	566.97	-0.609501	0.191975	0.00149891	0.0655137
174	chr3R	19040624	19041677	1054	Peak_10467	600.902	-0.609065	0.19692	0.00198169	0.0754753
175	chr2R	18129331	18129933	603	Peak_4758	741.505	-0.607888	0.211538	0.00405747	0.0982588
176	chr3L	2493321	2494092	772	Peak_5563	352.867	-0.605297	0.194169	0.00182466	0.0724635
177	chr3L	20688288	20689075	788	Peak_7881	1034.01	-0.604093	0.203787	0.00303345	0.0887207
178	chr2L	5421440	5422150	711	Peak_660	788.885	-0.602775	0.210526	0.00419404	0.0989911
179	chrX	3570644	3572037	1394	Peak_12038	1918.15	-0.602299	0.198787	0.00244653	0.080578
180	chr2L	1972569	1973275	707	Peak_269	1140.9	-0.601864	0.207434	0.00371424	0.0969522
181	chrX	12678806	12679323	518	Peak_13087	419.488	-0.599736	0.204897	0.00342244	0.0943299
182	chr2L	16485580	16487106	1527	Peak_1892	2104.39	-0.598128	0.187088	0.00138842	0.0638393
183	chr3R	2826249	2827122	874	Peak_8557	2299.98	-0.592295	0.204709	0.00381161	0.0975301
184	chr3R	13769363	13769993	631	Peak_9859	723.845	-0.588797	0.194338	0.00244748	0.080578
185	chrX	7520746	7521762	1017	Peak_12503	1554.86	-0.587768	0.200603	0.00338956	0.0943299
186	chr2L	6791886	6792460	575	Peak_809	608.046	-0.586683	0.181014	0.00119074	0.060269
187	chr2R	9426907	9427716	810	Peak_3647	865.73	-0.583983	0.171297	0.000651573	0.0387201
188	chr3R	2862713	2863779	1067	Peak_8564	2085.14	-0.583612	0.19438	0.00267836	0.0840522
189	chr3R	18498799	18500100	1302	Peak_10423	388.774	-0.583572	0.183872	0.00150457	0.0655137
190	chr3L	16044810	16046125	1316	Peak_7258	909.79	-0.582433	0.20232	0.00399233	0.0980653
191	chrX	12364117	12364704	588	Peak_13032	516.482	-0.579211	0.194512	0.00290352	0.086717
192	chr2R	6315292	6316722	1431	Peak_3198	1126.08	-0.577533	0.189731	0.00233488	0.0792636
193	chr3R	5753997	5755089	1093	Peak_8942	1279.61	-0.575628	0.161153	0.000354358	0.0267492
194	chr3R	14411147	14411558	412	Peak_9938	298.588	-0.57552	0.198169	0.0036821	0.0967157
195	chr2R	9806927	9807572	646	Peak_3683	470.518	-0.575414	0.201069	0.00421274	0.0991533
196	chr2R	15042372	15042972	601	Peak_4378	381.464	-0.574772	0.196976	0.00352309	0.0943299
197	chr3L	11001914	11002769	856	Peak_6601	765.294	-0.574398	0.17794	0.00124644	0.0610756
198	chr2L	15333398	15334124	727	Peak_1799	1424.99	-0.573122	0.199177	0.00400896	0.0980653
199	chr2R	6451566	6452807	1242	Peak_3225	1224.1	-0.571355	0.186867	0.00223158	0.0769812
200	chr2L	16532685	16533771	1087	Peak_1899	1443.62	-0.571271	0.17046	0.000804201	0.0453422
201	chrX	12643931	12647180	3250	Peak_13081	5990	-0.571123	0.193437	0.00315215	0.0907624
202	chrX	13457507	13458400	894	Peak_13174	1310.1	-0.560958	0.194947	0.00400849	0.0980653
203	chr4	827583	829099	1517	Peak_11533	1230.57	-0.560576	0.191067	0.00334707	0.0943299
204	chrX	18757575	18759720	2146	Peak_13808	2310.43	-0.556864	0.173646	0.0013418	0.0627355
205	chr3L	5544081	5544611	531	Peak_5917	405.25	-0.554058	0.192077	0.00391957	0.0978603
206	chr2R	2019237	2019910	674	Peak_2608	924.118	-0.546897	0.178557	0.0021923	0.0769812
207	chrX	17780138	17781718	1581	Peak_13695	1249.29	-0.546756	0.190532	0.00410958	0.0989598
208	chr2L	19508272	19509075	804	Peak_2192	677.165	-0.544872	0.173567	0.00169374	0.0706063
209	chr3R	5934802	5936114	1313	Peak_8964	1061.24	-0.536141	0.158222	0.000702659	0.040886
210	chr2R	19519582	19520260	679	Peak_4939	605.341	-0.532146	0.179189	0.00298048	0.0882453
211	chrX	6624310	6625643	1334	Peak_12390	754.349	-0.531355	0.1832	0.00372687	0.0969795
212	chr3R	912186	914128	1943	Peak_8317	2221.02	-0.529498	0.18246	0.003708	0.0969522
213	chr2L	10756096	10756597	502	Peak_1293	423.872	-0.528607	0.172716	0.00220926	0.0769812
214	chr3L	18009572	18010149	578	Peak_7549	590.58	-0.526741	0.183953	0.00419045	0.0989911
215	chr2R	7513299	7514388	1090	Peak_3390	696.177	-0.519254	0.17927	0.0037737	0.0972917
216	chr3L	18793098	18794829	1732	Peak_7642	2051.64	-0.516942	0.171832	0.0026262	0.0839552
217	chr3L	2191959	2192582	624	Peak_5534	473.431	-0.513023	0.178816	0.00411776	0.0989598
218	chr2L	16520114	16521861	1748	Peak_1897	1095.4	-0.509068	0.16044	0.00150903	0.0655137
219	chrX	4976337	4979056	2720	Peak_12218	2815.67	-0.506622	0.168504	0.00264204	0.0839552
220	chrX	7861061	7862498	1438	Peak_12547	923.425	-0.506212	0.176062	0.00403778	0.0980653
221	chr2L	7983949	7984503	555	Peak_969	842.755	-0.503457	0.172308	0.00347958	0.0943299
222	chr2L	3631910	3633302	1393	Peak_462	1833.03	-0.500093	0.172625	0.00376767	0.0972917

## Sheet: Maturity silenced (MS)
	Peak Attributes						Young Damaged vs. Old Damaged
Rank	Chr	Start	End	Width	Peak ID	BaseMean	log2 Fold Change	Standard Error	P Value	Adjusted P Value
1	chr2L	1927377	1927817	441	Peak_265	159.301	1.66729	0.313215	1.01998e-07	1.19161e-05
2	chr3L	2130150	2130496	347	Peak_5522	74.183	1.60436	0.337997	2.06785e-06	0.000125996
3	chrX	8937921	8938299	379	Peak_12671	131.655	1.57896	0.291649	6.16585e-08	7.85229e-06
4	chr3L	13212545	13213147	603	Peak_6927	123.522	1.55091	0.364156	2.05414e-05	0.000740747
5	chr3R	17030457	17030797	341	Peak_10213	95.79	1.55033	0.296118	1.64516e-07	1.72267e-05
6	chr3R	27318476	27318926	451	Peak_11375	125.63	1.5476	0.323682	1.74224e-06	0.000111441
7	chr3L	18388696	18389034	339	Peak_7614	73.4619	1.54715	0.386519	6.25996e-05	0.00173232
8	chrX	1885924	1886278	355	Peak_11802	91.935	1.5244	0.329767	3.78838e-06	0.00020285
9	chr2R	18537149	18537615	467	Peak_4815	118.47	1.49876	0.321554	3.14698e-06	0.000176531
10	chr2L	4656793	4657207	415	Peak_567	101.682	1.49312	0.343228	1.35997e-05	0.000544988
11	chr2R	8858231	8858715	485	Peak_3578	186.887	1.48046	0.351684	2.55773e-05	0.000886178
12	chr3L	21785770	21786057	288	Peak_8039	73.8756	1.47466	0.347029	2.14361e-05	0.000768446
13	chrX	20041420	20042328	909	Peak_13977	250.17	1.46614	0.314371	3.10554e-06	0.0001749
14	chrX	4953709	4954211	503	Peak_12215	157.135	1.46203	0.372984	8.86134e-05	0.00225701
15	chr2L	11247295	11248421	1127	Peak_1358	267.019	1.41835	0.291936	1.1832e-06	8.09438e-05
16	chrX	3291846	3292337	492	Peak_12013	122.84	1.38917	0.346953	6.2304e-05	0.00173031
17	chr2R	6162839	6163323	485	Peak_3190	149.036	1.38825	0.332463	2.97125e-05	0.000986699
18	chr2R	11362284	11362734	451	Peak_3893	106.861	1.38225	0.323375	1.91613e-05	0.000701719
19	chr3R	1037734	1038272	539	Peak_8335	181.707	1.38075	0.291168	2.1152e-06	0.000127236
20	chr3L	783011	783300	290	Peak_5346	86.1812	1.37379	0.281854	1.09301e-06	7.68694e-05
21	chr3L	16814205	16814550	346	Peak_7384	84.179	1.36497	0.333006	4.15068e-05	0.0012564
22	chrX	9608001	9608404	404	Peak_12758	105.371	1.35487	0.3299	4.00954e-05	0.00122442
23	chr3R	21826554	21827410	857	Peak_10797	426.367	1.35153	0.315232	1.80772e-05	0.000675103
24	chr2L	12467593	12467955	363	Peak_1467	92.8671	1.34146	0.322608	3.2082e-05	0.00103778
25	chr2L	14890417	14890929	513	Peak_1767	135.011	1.34016	0.332119	5.45589e-05	0.00156122
26	chr2R	16056003	16056408	406	Peak_4508	97.2527	1.3401	0.358267	0.00018366	0.00390992
27	chrX	10702508	10703161	654	Peak_12871	354.459	1.33848	0.287269	3.17283e-06	0.000177188
28	chr2L	704703	705204	502	Peak_136	153.576	1.32729	0.36294	0.000255137	0.00495415
29	chrX	1513047	1516832	3786	Peak_11755	2692.1	1.32602	0.228683	6.69074e-09	1.27811e-06
30	chr3R	21825143	21825696	554	Peak_10796	163.386	1.32596	0.319445	3.31291e-05	0.00105714
31	chr2R	17681789	17682331	543	Peak_4712	126.495	1.32496	0.342705	0.00011055	0.00272254
32	chrX	18896127	18896429	303	Peak_13835	80.3486	1.3119	0.354738	0.000217108	0.00445433
33	chr3L	16155236	16155554	319	Peak_7273	104.75	1.30993	0.326863	6.13464e-05	0.00171382
34	chr2L	1886449	1886674	226	Peak_258	71.2333	1.29911	0.324377	6.20365e-05	0.00172628
35	chrX	16674988	16675320	333	Peak_13535	109.902	1.29083	0.313038	3.73075e-05	0.00116163
36	chrX	14881859	14882357	499	Peak_13312	145.054	1.28572	0.33547	0.000126799	0.00300892
37	chr3L	14610838	14611192	355	Peak_7081	105.947	1.26591	0.35912	0.000423416	0.00727266
38	chrX	8653251	8653790	540	Peak_12640	130.727	1.26589	0.346081	0.000254387	0.00494638
39	chr3L	3347604	3347999	396	Peak_5685	124.446	1.26287	0.331217	0.000137391	0.00321244
40	chr2R	13823077	13824798	1722	Peak_4200	441.747	1.25888	0.378285	0.000875138	0.0125721
41	chrX	10703563	10704657	1095	Peak_12872	385.522	1.25788	0.28671	1.14772e-05	0.000470266
42	chr2R	14098625	14098921	297	Peak_4227	79.757	1.25788	0.377928	0.000873621	0.0125721
43	chr3L	13757066	13757390	325	Peak_6962	75.2509	1.25693	0.374693	0.000794906	0.0116323
44	chrX	14615571	14615944	374	Peak_13282	134.622	1.25441	0.320009	8.85718e-05	0.00225701
45	chr3L	8484115	8484633	519	Peak_6278	188.83	1.24772	0.308266	5.17601e-05	0.00150552
46	chr3L	22137465	22138058	594	Peak_8080	231.679	1.24656	0.270859	4.17974e-06	0.000220466
47	chr3R	4647394	4647797	404	Peak_8772	121.934	1.23938	0.336966	0.000235026	0.00468402
48	chr3L	18197133	18197843	711	Peak_7584	303.674	1.23114	0.238609	2.47422e-07	2.41211e-05
49	chr2L	5869715	5870149	435	Peak_697	132.512	1.22845	0.358075	0.000602009	0.00944506
50	chr3R	16106017	16106843	827	Peak_10113	251.177	1.2271	0.309782	7.45837e-05	0.00197808
51	chr2R	18260597	18261045	449	Peak_4779	169.338	1.22641	0.269365	5.28931e-06	0.00026235
52	chr3R	2488481	2489188	708	Peak_8498	175.055	1.22152	0.285832	1.92376e-05	0.000701935
53	chr2L	9192351	9192700	350	Peak_1124	87.5711	1.21932	0.340077	0.000336528	0.00609111
54	chrX	1994356	1994750	395	Peak_11826	95.1204	1.21845	0.340004	0.000338833	0.00612491
55	chr2L	1734173	1734548	376	Peak_253	99.1308	1.21809	0.355677	0.000615472	0.00960583
56	chr3L	18218529	18218846	318	Peak_7595	87.9345	1.20054	0.363275	0.000950537	0.0134234
57	chr3L	18019728	18020016	289	Peak_7551	73.9667	1.19825	0.368367	0.00114241	0.0154833
58	chr3R	17959935	17960648	714	Peak_10359	367.214	1.19517	0.245552	1.13144e-06	7.91783e-05
59	chrX	87619	88574	956	Peak_11574	607.143	1.19497	0.314852	0.000147448	0.00334562
60	chr3R	3274726	3275198	473	Peak_8621	138.08	1.19281	0.349922	0.000652522	0.00997195
61	chrX	5916749	5917100	352	Peak_12306	96.547	1.19223	0.318302	0.000179976	0.003875
62	chr3R	9823185	9823873	689	Peak_9379	227.019	1.19151	0.318453	0.000182889	0.00390992
63	chr2L	7913148	7913865	718	Peak_962	228.299	1.19137	0.349336	0.000648734	0.00995711
64	chrX	18280101	18280504	404	Peak_13748	105.401	1.18954	0.337996	0.000432562	0.00738489
65	chrX	12130571	12131137	567	Peak_13025	178.014	1.18681	0.240372	7.91734e-07	6.21775e-05
66	chr3R	21467061	21467614	554	Peak_10769	244.171	1.1831	0.277543	2.01924e-05	0.000730025
67	chr2L	2861485	2861988	504	Peak_364	175.003	1.18066	0.3402	0.000519538	0.00848358
68	chrX	11404159	11404781	623	Peak_12937	246.771	1.18063	0.327347	0.00031015	0.00577156
69	chr2R	10221551	10221959	409	Peak_3759	123.193	1.17725	0.299398	8.42164e-05	0.00216869
70	chr3R	6355263	6355658	396	Peak_9013	138.436	1.17546	0.283047	3.28344e-05	0.00105065
71	chrX	19666182	19666539	358	Peak_13953	131.608	1.17521	0.350795	0.000807687	0.0117949
72	chr3L	13052625	13053416	792	Peak_6901	319.717	1.17393	0.307947	0.00013778	0.00321244
73	chr3L	4119041	4119373	333	Peak_5787	122.667	1.17282	0.258996	5.94524e-06	0.000287815
74	chr3L	3250211	3250785	575	Peak_5664	271.313	1.17111	0.260514	6.94426e-06	0.000327214
75	chr2L	7324784	7325243	460	Peak_887	105.988	1.1701	0.361688	0.00121592	0.0161241
76	chrX	7409417	7409803	387	Peak_12483	114.973	1.16619	0.357811	0.00111709	0.0152277
77	chrX	1000218	1000577	360	Peak_11681	85.9248	1.16607	0.349014	0.000834674	0.0121513
78	chr3L	11118701	11119129	429	Peak_6622	120.966	1.16269	0.255042	5.14401e-06	0.000257857
79	chr3R	9877184	9877745	562	Peak_9394	241.961	1.16224	0.325593	0.000357496	0.00633278
80	chr3R	857549	858088	540	Peak_8305	221.708	1.16179	0.258677	7.08001e-06	0.000331401
81	chr3L	16013886	16014479	594	Peak_7247	131.989	1.16085	0.331591	0.000463783	0.00780481
82	chrX	1165618	1166067	450	Peak_11710	151.547	1.1607	0.261766	9.24468e-06	0.000398423
83	chr2L	622115	622766	652	Peak_115	240.854	1.15814	0.268938	1.65977e-05	0.000632585
84	chr2L	3555207	3556739	1533	Peak_442	530.581	1.15368	0.262015	1.06706e-05	0.000444955
85	chr3R	5703158	5703740	583	Peak_8931	179.147	1.14966	0.328608	0.000467753	0.00786226
86	chr2R	7794341	7794603	263	Peak_3438	63.9767	1.14818	0.354414	0.00119674	0.0159467
87	chr3L	16150496	16151890	1395	Peak_7271	743.384	1.14592	0.303779	0.000161811	0.00356843
88	chr3L	18198471	18199442	972	Peak_7585	346.859	1.14251	0.238617	1.68396e-06	0.000108696
89	chrX	13266259	13266663	405	Peak_13152	153.807	1.14218	0.302573	0.000160083	0.00354542
90	chrX	2830414	2830791	378	Peak_11939	119.377	1.12095	0.304336	0.000230253	0.00463656
91	chr3L	7732547	7732773	227	Peak_6173	63.7082	1.1167	0.363848	0.00214685	0.02407
92	chr3L	12094743	12095272	530	Peak_6759	277.498	1.11594	0.266856	2.89214e-05	0.000971101
93	chr3L	21763479	21763866	388	Peak_8034	115.861	1.11295	0.319062	0.000486314	0.00804981
94	chrX	18804460	18804865	406	Peak_13813	125.913	1.11267	0.348688	0.00141777	0.0181373
95	chr2L	21871563	21872123	561	Peak_2458	164.641	1.10888	0.289385	0.000127183	0.00301054
96	chrX	17452556	17453040	485	Peak_13633	166.966	1.10393	0.303327	0.00027326	0.00520473
97	chrX	13852697	13852981	285	Peak_13222	130.076	1.10378	0.335973	0.0010187	0.0141596
98	chr3L	18750108	18750734	627	Peak_7631	332.456	1.10284	0.331427	0.00087612	0.0125734
99	chrX	9534737	9535581	845	Peak_12747	320.901	1.10243	0.279045	7.7911e-05	0.00203577
100	chr3R	9047885	9048527	643	Peak_9273	278.408	1.10012	0.290273	0.000150677	0.00339795
101	chrX	3710704	3710994	291	Peak_12071	84.9008	1.09798	0.371556	0.00312595	0.0311186
102	chrX	16144879	16145211	333	Peak_13460	113.932	1.0968	0.324332	0.00072032	0.0107523
103	chr3R	10394284	10394885	602	Peak_9459	193.625	1.0941	0.269944	5.05486e-05	0.00147635
104	chr3R	2766559	2767896	1338	Peak_8542	892.93	1.09262	0.36629	0.00285492	0.0292896
105	chrX	6600744	6601210	467	Peak_12386	175.566	1.09226	0.291626	0.000180098	0.003875
106	chr3L	7564095	7564613	519	Peak_6154	287.601	1.09221	0.301836	0.000296259	0.00556904
107	chrX	13785887	13786638	752	Peak_13215	301.766	1.09167	0.278865	9.05251e-05	0.0022892
108	chr3L	10354134	10354541	408	Peak_6481	84.2592	1.07943	0.362017	0.00286646	0.0293413
109	chr3L	18249778	18250298	521	Peak_7606	107.784	1.07623	0.369451	0.00357926	0.0341637
110	chr3R	20374543	20374931	389	Peak_10637	113.475	1.07382	0.3306	0.00116175	0.0156404
111	chr3R	27515868	27516452	585	Peak_11411	241.671	1.07163	0.284171	0.000162542	0.00357339
112	chr2L	3784239	3784584	346	Peak_478	83.9783	1.07088	0.362093	0.00310176	0.0308996
113	chr3R	18378462	18379237	776	Peak_10412	183.572	1.06929	0.293734	0.00027228	0.00519427
114	chr3R	18619689	18620062	374	Peak_10435	103.646	1.06231	0.308969	0.000585514	0.00923055
115	chrX	839864	840280	417	Peak_11660	119.911	1.05988	0.328906	0.00127103	0.0167411
116	chr2L	10321545	10321936	392	Peak_1250	134.221	1.05813	0.313301	0.000731838	0.0109012
117	chr2L	11403832	11404109	278	Peak_1388	81.1059	1.05643	0.352105	0.0026968	0.0280722
118	chr3L	20627686	20627899	214	Peak_7871	35.7908	1.05336	0.387008	0.00649275	0.0522284
119	chr2R	19461853	19462261	409	Peak_4932	152.959	1.04796	0.372978	0.00495865	0.0433491
120	chr2L	2929801	2931046	1246	Peak_376	251.934	1.04749	0.297547	0.000430878	0.00736978
121	chrX	5436847	5437369	523	Peak_12238	159.562	1.04625	0.259916	5.68981e-05	0.00160862
122	chr3L	17951206	17951672	467	Peak_7525	141.43	1.04606	0.342043	0.00222611	0.0246039
123	chr2L	11206785	11207193	409	Peak_1353	153.599	1.0451	0.263155	7.14506e-05	0.00192753
124	chr3R	26133254	26134523	1270	Peak_11263	288.568	1.04388	0.274892	0.000146212	0.00332291
125	chr3L	17942189	17942843	655	Peak_7524	188.86	1.04284	0.302651	0.000569592	0.00904311
126	chr2L	7324124	7324664	541	Peak_886	157.216	1.04181	0.331131	0.00165394	0.0200344
127	chrX	4914972	4915827	856	Peak_12202	320.016	1.04171	0.318118	0.00105808	0.01462
128	chrX	8670666	8671433	768	Peak_12642	182.574	1.04119	0.330863	0.00165012	0.0200145
129	chrX	17205000	17205359	360	Peak_13599	116.552	1.03908	0.341635	0.00235408	0.0256176
130	chr3R	17244947	17245700	754	Peak_10245	385.152	1.03832	0.290147	0.000345424	0.00619564
131	chr3L	1590220	1590683	464	Peak_5458	100.177	1.03767	0.28796	0.000313951	0.00580891
132	chrX	11271956	11272522	567	Peak_12922	268.307	1.03651	0.332479	0.00182372	0.0215268
133	chr3R	10308679	10309254	576	Peak_9453	245.098	1.03372	0.347672	0.00294663	0.0297716
134	chrX	1135930	1136912	983	Peak_11701	307.618	1.03168	0.324583	0.00148058	0.018604
135	chr3R	5703859	5704112	254	Peak_8932	123.065	1.02954	0.323311	0.00145071	0.018404
136	chr2R	16959488	16961450	1963	Peak_4606	736.813	1.02938	0.160455	1.40455e-10	5.22494e-08
137	chr3R	12939522	12939819	298	Peak_9804	95.6919	1.02833	0.254736	5.41745e-05	0.00155653
138	chrX	11341475	11342311	837	Peak_12927	282.949	1.02653	0.278277	0.000225243	0.00456165
139	chrX	3760220	3760677	458	Peak_12083	158.61	1.02371	0.334681	0.00222264	0.0245847
140	chrX	4388774	4389278	505	Peak_12150	257.649	1.02237	0.31264	0.00107505	0.0147686
141	chrX	2431537	2431828	292	Peak_11898	99.3536	1.02077	0.322445	0.00154697	0.0191825
142	chr3R	3995846	3996289	444	Peak_8687	143.603	1.0203	0.274871	0.000205699	0.00427612
143	chr3R	3264585	3264856	272	Peak_8619	119.841	1.01904	0.308048	0.000939504	0.0132941
144	chrX	1154229	1154776	548	Peak_11706	147.359	1.0178	0.288642	0.000421629	0.00726848
145	chr2L	12600654	12601094	441	Peak_1491	114.324	1.01695	0.319928	0.00147951	0.018604
146	chr3L	14329133	14330063	931	Peak_7034	389.467	1.01691	0.265967	0.000131606	0.00309032
147	chr3L	16471854	16472121	268	Peak_7328	89.817	1.01607	0.361936	0.00499572	0.0435923
148	chr2R	11552426	11552846	421	Peak_3921	126.083	1.01405	0.340683	0.00291546	0.0295858
149	chrX	11534356	11534772	417	Peak_12962	221.335	1.01362	0.350472	0.00382598	0.0359363
150	chr3L	7614608	7615467	860	Peak_6165	260.358	1.0115	0.280857	0.00031642	0.00584694
151	chrX	9026302	9027117	816	Peak_12691	410.713	1.00974	0.326296	0.00197106	0.0226528
152	chr2R	4542092	4542392	301	Peak_2959	111.516	1.00886	0.312049	0.00122491	0.0162196
153	chr2L	16450897	16451430	534	Peak_1886	216.78	1.00855	0.295697	0.000647864	0.00995711
154	chr3R	9849925	9851369	1445	Peak_9388	796.67	1.00782	0.283102	0.000370982	0.00652264
155	chr3R	15221266	15221558	293	Peak_10051	86.1946	1.00766	0.334493	0.00259107	0.0273542
156	chrX	8658449	8658969	521	Peak_12641	180.575	1.00507	0.282241	0.000369399	0.00650289
157	chr3R	14275856	14276432	577	Peak_9923	446.804	1.00306	0.185265	6.15655e-08	7.85229e-06
158	chr3R	12101760	12102191	432	Peak_9684	196.324	1.00168	0.294466	0.000669735	0.0101909
159	chr3R	923759	924435	677	Peak_8322	221.76	0.997316	0.261982	0.00014077	0.00325426
160	chr3R	12048906	12049566	661	Peak_9661	382.675	0.994828	0.304739	0.00109646	0.0149674
161	chrX	2148102	2148494	393	Peak_11850	142.697	0.994427	0.28103	0.000402396	0.00700526
162	chrX	19663809	19665609	1801	Peak_13952	868.75	0.994278	0.274917	0.000298438	0.00559511
163	chr2L	12391392	12391613	222	Peak_1456	47.5336	0.993254	0.39216	0.0113162	0.0769436
164	chr3R	9750809	9751032	224	Peak_9365	78.7491	0.992878	0.333984	0.00295062	0.0297716
165	chr2L	5228643	5229040	398	Peak_627	123.486	0.992741	0.247299	5.96156e-05	0.00167208
166	chr2R	3042929	3043228	300	Peak_2752	96.6538	0.99202	0.290611	0.000641194	0.00991676
167	chrX	13643023	13643618	596	Peak_13198	274.861	0.991975	0.333892	0.00296887	0.0298492
168	chr2R	13386763	13387959	1197	Peak_4136	710.796	0.989093	0.225724	1.17662e-05	0.000479329
169	chrX	7532864	7533112	249	Peak_12507	75.4107	0.983475	0.338208	0.00363863	0.0345206
170	chr3R	27868937	27869180	244	Peak_11457	90.5978	0.982942	0.30931	0.00148369	0.01861
171	chr3L	6367665	6368208	544	Peak_6031	198.705	0.982153	0.308448	0.00145165	0.018404
172	chr2R	20574712	20576248	1537	Peak_5105	467.514	0.982145	0.265047	0.000210937	0.00436574
173	chr2L	18752953	18753724	772	Peak_2084	397.497	0.98125	0.254168	0.000113094	0.00275637
174	chr2R	15728809	15729335	527	Peak_4447	160.009	0.978962	0.272976	0.000335463	0.00609111
175	chr3R	10535521	10536042	522	Peak_9480	114.581	0.978588	0.347244	0.00482997	0.0425472
176	chr3R	27548705	27549024	320	Peak_11422	117.255	0.977571	0.263342	0.00020549	0.00427612
177	chr3L	22704740	22705626	887	Peak_8139	229.711	0.977004	0.310192	0.00163453	0.0199078
178	chr3L	395061	395686	626	Peak_5252	169.617	0.976882	0.32778	0.00287971	0.0294193
179	chr2R	8930766	8930974	209	Peak_3600	74.9553	0.976278	0.367725	0.00793286	0.0602897
180	chr3L	20906114	20906403	290	Peak_7901	108.028	0.975125	0.315612	0.00200407	0.0229574
181	chr2L	707994	708737	744	Peak_137	447.94	0.974361	0.33681	0.00381693	0.0358989
182	chr2L	20879695	20879974	280	Peak_2325	92.8019	0.972362	0.331411	0.00334619	0.0326369
183	chrX	8007815	8008262	448	Peak_12561	175.646	0.970776	0.272397	0.000365492	0.00645784
184	chr3L	14050023	14050363	341	Peak_6995	101.444	0.969762	0.28135	0.000567226	0.00903224
185	chrX	15514442	15515062	621	Peak_13374	160.284	0.969692	0.30902	0.00170126	0.0204434
186	chr3R	2696591	2696884	294	Peak_8529	103.315	0.96918	0.314664	0.00206968	0.0233496
187	chr2R	14237415	14238043	629	Peak_4269	209.164	0.968679	0.251319	0.000116025	0.00280364
188	chr3L	17988405	17988855	451	Peak_7538	137.032	0.96758	0.307801	0.00166928	0.020167
189	chr3R	19765335	19766180	846	Peak_10567	396.622	0.967566	0.286932	0.00074594	0.0110763
190	chr2R	8553283	8553608	326	Peak_3536	168.905	0.967311	0.2389	5.14331e-05	0.00149909
191	chr2R	8425405	8425813	409	Peak_3521	96.4446	0.962062	0.346045	0.00543314	0.0460725
192	chr2L	833259	833566	308	Peak_147	102.237	0.961591	0.290854	0.000946056	0.0133735
193	chr3R	1074461	1074866	406	Peak_8342	125.728	0.961303	0.264573	0.000279699	0.00530573
194	chr2L	654695	654985	291	Peak_123	129.635	0.960228	0.321239	0.00279764	0.0288037
195	chr2L	19789299	19789739	441	Peak_2213	121.37	0.960193	0.301263	0.00143645	0.0183099
196	chr3L	20192289	20192668	380	Peak_7811	151.865	0.959929	0.250535	0.000127356	0.00301054
197	chr3R	4035687	4036171	485	Peak_8696	134.59	0.959556	0.31307	0.00217678	0.0242865
198	chr3L	6799942	6800291	350	Peak_6071	109.179	0.95866	0.34057	0.00487965	0.0428705
199	chr3R	9851449	9851992	544	Peak_9389	242.392	0.958389	0.279859	0.000615828	0.00960583
200	chrX	2812529	2813000	472	Peak_11937	207.624	0.958163	0.285325	0.000784661	0.0115301
201	chr2L	13150879	13151090	212	Peak_1552	87.5833	0.958106	0.318886	0.0026598	0.0278346
202	chr2L	6502922	6503251	330	Peak_769	137.494	0.957475	0.300394	0.00143557	0.0183099
203	chr2R	12491579	12492165	587	Peak_4042	305.861	0.957232	0.233168	4.03732e-05	0.00122999
204	chrX	3303610	3303944	335	Peak_12018	139.524	0.956411	0.319325	0.00274354	0.0283908
205	chr3R	15101644	15102345	702	Peak_10023	313.617	0.954193	0.275348	0.000529437	0.00861233
206	chr3R	1126530	1126942	413	Peak_8352	113.996	0.95378	0.331354	0.00399653	0.0370921
207	chr3R	26649496	26649816	321	Peak_11318	144.386	0.952169	0.337382	0.00476916	0.0421355
208	chr3L	17596989	17597338	350	Peak_7483	98.8776	0.9507	0.368149	0.00981219	0.0697011
209	chr2L	1424611	1425406	796	Peak_197	492.609	0.950101	0.211432	7.0014e-06	0.00032881
210	chr2L	1688243	1688576	334	Peak_241	150.307	0.949172	0.363045	0.00893651	0.0653188
211	chr2L	15415977	15416363	387	Peak_1822	110.215	0.948961	0.353421	0.0072514	0.0569161
212	chr3R	17029537	17030200	664	Peak_10212	307.765	0.947883	0.271824	0.000488257	0.00807252
213	chr2L	4219027	4219756	730	Peak_513	283.208	0.947106	0.387991	0.0146444	0.0914392
214	chr3L	10289522	10290186	665	Peak_6467	241.674	0.946596	0.276456	0.000616984	0.00960583
215	chr3L	6330994	6331436	443	Peak_6020	130.462	0.945148	0.345841	0.00627795	0.0510322
216	chr3L	14144664	14145171	508	Peak_7009	162.341	0.945135	0.331298	0.00433331	0.0391661
217	chrX	8615597	8615881	285	Peak_12637	100.274	0.943868	0.319899	0.00317243	0.0314261
218	chr3L	839592	840009	418	Peak_5366	143.21	0.942031	0.257477	0.000253491	0.00493573
219	chr2R	19460551	19461404	854	Peak_4931	391.2	0.939304	0.257249	0.000260877	0.00502419
220	chr3R	9830704	9831220	517	Peak_9382	238.155	0.938542	0.356603	0.00849089	0.0630985
221	chr3R	19052315	19052801	487	Peak_10470	190.733	0.938458	0.244183	0.00012141	0.0029188
222	chr3L	15246994	15247700	707	Peak_7172	329.885	0.937053	0.269319	0.000502647	0.00826212
223	chr2L	18774030	18774365	336	Peak_2086	96.1135	0.936973	0.369925	0.0113132	0.0769436
224	chrX	6890169	6890531	363	Peak_12435	128.747	0.935157	0.217206	1.66684e-05	0.000633397
225	chr2L	14850353	14850888	536	Peak_1765	111.265	0.93466	0.295882	0.00158368	0.019569
226	chr2L	8086731	8087165	435	Peak_990	158.902	0.933138	0.287877	0.00118926	0.0158748
227	chr3R	15529131	15529600	470	Peak_10073	184.119	0.931311	0.304636	0.00223471	0.0246673
228	chr2L	8012420	8012968	549	Peak_981	238.594	0.929087	0.306336	0.00242216	0.0261771
229	chr2L	17743031	17743316	286	Peak_1986	133.965	0.929004	0.297988	0.00182336	0.0215268
230	chr2R	5118465	5119312	848	Peak_3044	402.033	0.928928	0.201477	4.0152e-06	0.00021258
231	chr3R	11362844	11363324	481	Peak_9573	170.141	0.928482	0.329899	0.0048861	0.0429005
232	chr3L	21784644	21785101	458	Peak_8038	142.781	0.927889	0.320992	0.00384398	0.0360096
233	chr2R	2424297	2424602	306	Peak_2662	96.08	0.927672	0.347478	0.00759122	0.058575
234	chr2L	4801546	4802301	756	Peak_571	455.587	0.925507	0.299693	0.00201381	0.0230317
235	chr2L	110129	110475	347	Peak_22	126.636	0.924527	0.353868	0.00898481	0.0655701
236	chr3L	14056909	14057411	503	Peak_6998	158.945	0.924354	0.278008	0.000884442	0.0126659
237	chr3R	17239941	17241407	1467	Peak_10243	554.975	0.924117	0.269488	0.000605454	0.00946758
238	chr2L	12520264	12520717	454	Peak_1476	340.14	0.924077	0.234062	7.88089e-05	0.00204787
239	chr3R	6482184	6483034	851	Peak_9042	384.314	0.923586	0.297287	0.00189181	0.0220648
240	chr3L	3411075	3411408	334	Peak_5697	104.328	0.922565	0.291239	0.00153636	0.0190843
241	chrX	18154730	18155342	613	Peak_13724	200.713	0.919124	0.345678	0.00783955	0.0598379
242	chr2L	14559021	14559465	445	Peak_1724	142.078	0.918754	0.345266	0.00779076	0.0595943
243	chr3L	3978238	3978544	307	Peak_5777	102.986	0.917656	0.243883	0.000168096	0.00366699
244	chr2R	20472072	20472466	395	Peak_5090	104.769	0.91572	0.333274	0.00600248	0.0493994
245	chr3R	11950901	11951258	358	Peak_9637	125.743	0.915285	0.333135	0.00600538	0.0493994
246	chr3R	864689	864958	270	Peak_8307	106.289	0.915106	0.328629	0.00535903	0.0456632
247	chrX	9384860	9385269	410	Peak_12728	146.021	0.913652	0.358079	0.0107248	0.0738462
248	chr2L	8293177	8293465	289	Peak_1017	85.3692	0.911572	0.332543	0.00612122	0.0501231
249	chrX	19467810	19468126	317	Peak_13909	138.097	0.910543	0.302851	0.00264212	0.0277145
250	chrX	16473412	16474000	589	Peak_13498	171.346	0.910068	0.249083	0.000258517	0.00500357
251	chr3R	14905000	14906955	1956	Peak_9991	497.393	0.909679	0.260104	0.000469885	0.00787295
252	chrX	1178208	1178686	479	Peak_11714	183.119	0.909133	0.312428	0.00361543	0.0343697
253	chr2L	8699811	8700075	265	Peak_1078	100.484	0.908556	0.323393	0.00496261	0.0433569
254	chr3L	20625094	20625583	490	Peak_7870	166.629	0.908012	0.345944	0.00867167	0.0639785
255	chrX	6154117	6154428	312	Peak_12320	89.6208	0.907128	0.362483	0.0123306	0.0812615
256	chr3L	2144383	2144733	351	Peak_5524	111.567	0.906213	0.311575	0.00363177	0.0344787
257	chr2L	2165705	2167345	1641	Peak_289	818.924	0.905498	0.285662	0.00152531	0.019014
258	chr2R	4545267	4545998	732	Peak_2961	252.135	0.905418	0.276826	0.00107277	0.0147604
259	chrX	15391610	15392351	742	Peak_13357	169.719	0.903656	0.289531	0.00180171	0.0213487
260	chr2R	18892129	18893194	1066	Peak_4857	380.511	0.903624	0.302956	0.00285727	0.0292896
261	chr2R	9458415	9458715	301	Peak_3655	121.446	0.902468	0.276939	0.00111913	0.0152409
262	chrX	13425062	13425569	508	Peak_13168	148.478	0.90194	0.30471	0.00307648	0.030691
263	chr3R	8198307	8199062	756	Peak_9214	397.456	0.901388	0.252181	0.000351069	0.00625975
264	chr3L	18888075	18888480	406	Peak_7660	139.053	0.900875	0.345587	0.00913939	0.0664538
265	chrX	15864127	15864633	507	Peak_13422	148.998	0.900757	0.296208	0.00235822	0.0256429
266	chr3L	11274820	11275349	530	Peak_6643	294.811	0.899873	0.285712	0.00163504	0.0199078
267	chr2R	5437555	5437983	429	Peak_3084	169.815	0.899708	0.246305	0.000259367	0.00500876
268	chr2L	6695357	6695774	418	Peak_799	128.837	0.898007	0.261803	0.00060339	0.00944577
269	chr3L	11344096	11344451	356	Peak_6661	97.2814	0.896728	0.300892	0.00288033	0.0294193
270	chr3L	6456378	6457454	1077	Peak_6045	334.54	0.894049	0.29757	0.0026602	0.0278346
271	chr2R	7815187	7815487	301	Peak_3441	99.1057	0.891071	0.322892	0.00578627	0.0480016
272	chrX	200167	200490	324	Peak_11582	97.4187	0.89024	0.238359	0.000187811	0.00396845
273	chr3R	6500874	6501182	309	Peak_9050	96.6893	0.889559	0.342304	0.00935679	0.0672775
274	chrX	4358582	4359227	646	Peak_12141	307.259	0.889103	0.26633	0.000842765	0.0122565
275	chr3R	9105204	9105721	518	Peak_9282	161.486	0.888425	0.284842	0.00181459	0.0214833
276	chrX	9824819	9825375	557	Peak_12775	472.099	0.888058	0.21474	3.54164e-05	0.00111255
277	chr2L	5230350	5231212	863	Peak_628	360.423	0.887873	0.30276	0.00336137	0.0326596
278	chr3R	12222071	12222547	477	Peak_9706	174.727	0.886426	0.268967	0.000981869	0.0137045
279	chrX	4507485	4507894	410	Peak_12167	160.281	0.885217	0.286296	0.00198834	0.0228328
280	chr3L	2531397	2531695	299	Peak_5564	105.047	0.884797	0.309376	0.00423713	0.0385431
281	chr3L	6117886	6118170	285	Peak_5986	107.701	0.883627	0.314184	0.00491657	0.0430878
282	chr3L	21094473	21094765	293	Peak_7943	93.9789	0.883247	0.302504	0.00350272	0.0336375
283	chrX	10704752	10705343	592	Peak_12873	317.198	0.883063	0.31708	0.00535301	0.0456496
284	chr2R	4039624	4039918	295	Peak_2900	125.239	0.882847	0.285969	0.00202041	0.0230725
285	chrX	3034768	3035220	453	Peak_11980	303.702	0.882005	0.271002	0.00113552	0.0154047
286	chrX	6870459	6871071	613	Peak_12427	235.805	0.881846	0.288772	0.00225975	0.0248784
287	chrX	1742895	1743387	493	Peak_11775	131.433	0.880432	0.307118	0.00414706	0.0380915
288	chr2L	4576499	4577062	564	Peak_550	212.055	0.878913	0.312615	0.00493133	0.0431904
289	chr3L	6126546	6126819	274	Peak_5988	103.35	0.876181	0.332927	0.00849458	0.0630985
290	chr2L	14672530	14672889	360	Peak_1753	116.532	0.8755	0.33269	0.00849883	0.0630985
291	chr2R	2442602	2443017	416	Peak_2668	127.874	0.874178	0.293828	0.00292859	0.0296764
292	chr2R	14582584	14582938	355	Peak_4328	129.716	0.873232	0.289856	0.00258985	0.0273542
293	chr3L	22411020	22411590	571	Peak_8120	223.611	0.872929	0.312818	0.00526215	0.045111
294	chr2R	17738686	17739846	1161	Peak_4716	216.551	0.872757	0.356275	0.0142986	0.0901941
295	chr3L	6372671	6373225	555	Peak_6033	138.994	0.871823	0.335772	0.00941856	0.0676493
296	chr3L	20223397	20223943	547	Peak_7813	398.797	0.871565	0.277101	0.00165922	0.0200811
297	chrX	14733722	14734590	869	Peak_13294	464.063	0.871022	0.249122	0.000471643	0.00788079
298	chr3L	19769197	19769586	390	Peak_7765	117.881	0.868728	0.295977	0.00333419	0.0326026
299	chr3R	9924311	9924678	368	Peak_9401	148.258	0.868071	0.30002	0.00381121	0.035869
300	chr3L	7828218	7828642	425	Peak_6185	158.116	0.867884	0.276966	0.00172712	0.0206728
301	chr3R	5765687	5766140	454	Peak_8943	96.345	0.867611	0.32512	0.00761717	0.0587112
302	chr2R	11251256	11251673	418	Peak_3890	109.68	0.866716	0.289399	0.00274549	0.0283908
303	chr3L	17589987	17590384	398	Peak_7482	183.498	0.866712	0.313508	0.00569993	0.0475612
304	chrX	2429243	2429822	580	Peak_11897	225.442	0.866085	0.331242	0.00893156	0.0653188
305	chr3R	19599543	19600085	543	Peak_10534	226.035	0.864987	0.294958	0.00336161	0.0326596
306	chr3L	4446258	4446495	238	Peak_5852	82.2571	0.863862	0.344671	0.0121989	0.0806118
307	chr3L	17850248	17850763	516	Peak_7511	227.694	0.862812	0.336424	0.0103277	0.072024
308	chr2R	19677351	19677712	362	Peak_4963	83.0672	0.862627	0.358267	0.01605	0.0975418
309	chr3L	3777013	3777233	221	Peak_5746	60.3877	0.860661	0.341698	0.0117763	0.0790827
310	chrX	18153432	18153833	402	Peak_13723	102.87	0.860513	0.336765	0.0106118	0.0735696
311	chr3R	10533658	10533971	314	Peak_9479	100.72	0.859596	0.328141	0.00880349	0.0645467
312	chr3R	14306003	14307755	1753	Peak_9933	1150.5	0.859587	0.262374	0.00105216	0.0145818
313	chr3R	9829505	9830163	659	Peak_9381	329.057	0.858205	0.310919	0.00577617	0.0479741
314	chr3R	14292559	14292970	412	Peak_9927	121.972	0.857932	0.355233	0.0157299	0.0962689
315	chr2L	7518102	7518685	584	Peak_916	188.065	0.857781	0.288491	0.00294583	0.0297716
316	chr2L	520957	521356	400	Peak_90	149.869	0.855246	0.283774	0.00257977	0.0273267
317	chr2L	7075964	7076727	764	Peak_851	252.721	0.854404	0.334575	0.0106584	0.0737711
318	chr3R	27150189	27150749	561	Peak_11360	155.464	0.854366	0.342709	0.0126677	0.0829796
319	chrX	12165576	12166484	909	Peak_13029	279.413	0.853531	0.233266	0.000253149	0.00493573
320	chr2R	21015844	21016144	301	Peak_5177	81.1843	0.853293	0.355074	0.0162548	0.0982378
321	chr2R	15995131	15995543	413	Peak_4495	100.693	0.851956	0.319374	0.00763995	0.0587906
322	chrX	14011416	14011903	488	Peak_13244	146.079	0.851632	0.260493	0.0010781	0.0147962
323	chr2L	16612613	16613445	833	Peak_1914	343.701	0.850965	0.278599	0.0022548	0.0248626
324	chr2L	8171548	8172009	462	Peak_1000	132.775	0.848859	0.270616	0.0017082	0.0204811
325	chrX	19191036	19191450	415	Peak_13869	199.838	0.848662	0.254992	0.000874133	0.0125721
326	chr3R	15094418	15094922	505	Peak_10022	267.373	0.848082	0.27489	0.00203435	0.0231543
327	chr3R	276955	277352	398	Peak_8229	121.131	0.847624	0.245819	0.000564412	0.00901528
328	chr2R	11672688	11673113	426	Peak_3933	123.755	0.845995	0.28144	0.00264752	0.027743
329	chr3L	4388080	4388979	900	Peak_5842	301.84	0.845014	0.310044	0.00642117	0.0519277
330	chr2R	15873527	15874603	1077	Peak_4475	348.738	0.844334	0.264101	0.00138861	0.0178287
331	chr3R	21469571	21469924	354	Peak_10770	132.94	0.844211	0.33085	0.0107217	0.0738462
332	chrX	11455525	11456083	559	Peak_12948	159.945	0.842613	0.271093	0.00188228	0.0220081
333	chr2R	20849119	20849574	456	Peak_5147	168.053	0.842148	0.292381	0.00397281	0.0369471
334	chr3R	10383616	10384246	631	Peak_9458	214.804	0.841831	0.274937	0.00219937	0.0244229
335	chrX	4308540	4308880	341	Peak_12129	128.626	0.841527	0.301375	0.00523365	0.045084
336	chr3R	17453280	17454110	831	Peak_10283	337.997	0.841433	0.273146	0.00206641	0.0233313
337	chr3L	21948027	21948411	385	Peak_8065	172.859	0.841421	0.278648	0.00253061	0.0269584
338	chrX	17606975	17607411	437	Peak_13660	221.406	0.841331	0.286706	0.0033411	0.0326369
339	chr3R	14262505	14262949	445	Peak_9919	178.623	0.840497	0.249572	0.000757818	0.0112173
340	chr2L	512572	513338	767	Peak_87	289.334	0.837079	0.271246	0.00202832	0.0231228
341	chr2L	4626921	4627999	1079	Peak_561	426.044	0.83598	0.277079	0.00255192	0.0270623
342	chrX	12507112	12507519	408	Peak_13048	123.955	0.834255	0.335053	0.0127772	0.0835426
343	chr2R	14160726	14161154	429	Peak_4250	135.476	0.833534	0.288347	0.00384342	0.0360096
344	chr3L	6366644	6367087	444	Peak_6030	126.511	0.832966	0.31771	0.00874719	0.0643677
345	chr2R	18196134	18196475	342	Peak_4770	121.1	0.831569	0.291042	0.00427383	0.038827
346	chrX	9390961	9391656	696	Peak_12730	890.398	0.830883	0.26356	0.00161856	0.0198267
347	chr3R	20688078	20688801	724	Peak_10676	226.433	0.830252	0.257731	0.00127568	0.016775
348	chr3R	4538855	4539475	621	Peak_8752	176.732	0.829895	0.281292	0.00317463	0.0314261
349	chrX	16419606	16420622	1017	Peak_13494	476.878	0.829277	0.235822	0.000437216	0.00744637
350	chr3L	13250622	13251146	525	Peak_6932	150.349	0.829234	0.339753	0.014659	0.0914879
351	chr3R	17417690	17418017	328	Peak_10267	164.429	0.828053	0.272191	0.00234876	0.0255991
352	chr3R	13429444	13429795	352	Peak_9830	132.191	0.827981	0.310252	0.00761375	0.0587112
353	chr2R	5324872	5325353	482	Peak_3072	163.935	0.826223	0.255567	0.00122542	0.0162196
354	chrX	3246539	3246784	246	Peak_12001	66.4877	0.82613	0.292084	0.00467812	0.0415535
355	chrX	9581756	9582103	348	Peak_12755	140.17	0.825387	0.293692	0.00494822	0.0432847
356	chrX	16858027	16858436	410	Peak_13563	141.567	0.824501	0.227666	0.000292856	0.00551241
357	chr3R	4569423	4569995	573	Peak_8757	187.878	0.824409	0.331687	0.012937	0.0842752
358	chr2L	19145879	19147138	1260	Peak_2140	585.527	0.824236	0.250434	0.000997511	0.0138924
359	chrX	6754127	6755008	882	Peak_12414	551.805	0.823918	0.21778	0.000154785	0.00346644
360	chr2R	14492767	14493072	306	Peak_4306	96.2297	0.823823	0.342077	0.016027	0.0974442
361	chr2R	6741371	6741823	453	Peak_3261	299.954	0.823305	0.228975	0.000323636	0.00595454
362	chr2L	11038048	11038581	534	Peak_1324	228.236	0.821194	0.297489	0.0057727	0.0479741
363	chr2R	10769436	10769763	328	Peak_3821	122.44	0.819888	0.271029	0.00248556	0.0267372
364	chr2R	6416011	6416355	345	Peak_3209	126.099	0.819144	0.278162	0.0032312	0.0318302
365	chr3R	10576848	10577104	257	Peak_9495	83.3397	0.817048	0.300188	0.00649299	0.0522284
366	chr2R	11545302	11545730	429	Peak_3920	143.22	0.816882	0.305516	0.00750027	0.0581271
367	chr3R	19271480	19271889	410	Peak_10501	140.426	0.816238	0.307568	0.00795808	0.0604165
368	chr3R	12050132	12050681	550	Peak_9662	275.07	0.816174	0.218881	0.000192352	0.00404627
369	chr2R	10763262	10763485	224	Peak_3820	90.0553	0.815518	0.330351	0.0135626	0.0867909
370	chr3R	23567066	23567577	512	Peak_10989	185.508	0.81465	0.305333	0.00762879	0.0587687
371	chrX	614444	614752	309	Peak_11637	104.077	0.814074	0.290548	0.00508098	0.044161
372	chr3L	21272907	21273527	621	Peak_7967	250.614	0.813388	0.232672	0.00047253	0.00788629
373	chr3L	16473551	16473996	446	Peak_7329	159.615	0.811985	0.224609	0.000300227	0.0056212
374	chr2R	3869756	3870183	428	Peak_2875	135.102	0.811939	0.312104	0.00928164	0.0670434
375	chr2R	6079794	6080145	352	Peak_3175	110.143	0.811816	0.272257	0.00286561	0.0293413
376	chr3L	14056194	14056423	230	Peak_6997	116.522	0.811756	0.306206	0.00802504	0.0607942
377	chr3L	12546515	12547384	870	Peak_6821	492.449	0.811749	0.315813	0.0101597	0.0713098
378	chr2L	20320284	20320704	421	Peak_2270	125.786	0.810786	0.315124	0.0100848	0.0708923
379	chr3R	9230323	9231517	1195	Peak_9300	350.369	0.808264	0.256552	0.00162995	0.0198905
380	chrX	8349077	8349763	687	Peak_12602	228.636	0.805984	0.275769	0.00347036	0.0334632
381	chr3R	25111992	25112409	418	Peak_11110	151.777	0.805923	0.334294	0.0159165	0.0970485
382	chrX	17419634	17420128	495	Peak_13626	159.864	0.80581	0.28319	0.00443447	0.0398511
383	chrX	5904410	5905146	737	Peak_12299	298.017	0.805373	0.315409	0.010667	0.0737711
384	chrX	351109	352111	1003	Peak_11605	403.07	0.80516	0.293596	0.00609898	0.0500379
385	chr2L	8844704	8845040	337	Peak_1086	103.385	0.804681	0.292428	0.00592826	0.0489783
386	chr3R	2791142	2791532	391	Peak_8548	173.066	0.804117	0.26032	0.00200864	0.0229912
387	chr2R	16158192	16158966	775	Peak_4530	292.982	0.803352	0.294599	0.00639252	0.0517849
388	chrX	81680	82095	416	Peak_11572	239.621	0.802755	0.26527	0.00247663	0.0266638
389	chr2L	8857664	8858268	605	Peak_1089	200.421	0.802541	0.309248	0.00945543	0.0678143
390	chr3R	4716859	4717513	655	Peak_8783	231.674	0.801565	0.301782	0.00790489	0.0601742
391	chr2R	14813746	14814693	948	Peak_4360	333.274	0.801482	0.303253	0.00821877	0.0619961
392	chrX	2823540	2823958	419	Peak_11938	159.175	0.800418	0.330469	0.0154326	0.0951811
393	chrX	18841088	18841491	404	Peak_13826	120.798	0.799071	0.319688	0.0124356	0.0818387
394	chrX	1992147	1992729	583	Peak_11825	154.511	0.798265	0.329575	0.015431	0.0951811
395	chr2R	12996111	12996774	664	Peak_4102	261.431	0.797499	0.285686	0.00524601	0.045111
396	chr3R	17387266	17387622	357	Peak_10262	107.237	0.797492	0.307075	0.00940245	0.0675714
397	chr2L	20704363	20704849	487	Peak_2298	117.543	0.797428	0.312352	0.0106805	0.0738284
398	chr3L	10543040	10543603	564	Peak_6502	238.887	0.797098	0.332154	0.0164048	0.0988192
399	chr2L	3585444	3585778	335	Peak_451	129.908	0.796376	0.291513	0.00629752	0.051162
400	chr2R	3173158	3173660	503	Peak_2770	333.019	0.796062	0.305875	0.00925279	0.066904
401	chrX	6768243	6768720	478	Peak_12421	193.785	0.795382	0.211109	0.000164803	0.00361747
402	chr2R	20637026	20637393	368	Peak_5107	132.286	0.795226	0.325331	0.0145111	0.090805
403	chr3R	14268920	14269303	384	Peak_9920	145.529	0.793053	0.291343	0.00648764	0.0522284
404	chr2R	2020315	2021183	869	Peak_2609	326.981	0.79296	0.257297	0.00205691	0.0232426
405	chr2L	9082870	9083284	415	Peak_1107	169.525	0.792773	0.231596	0.000619142	0.0096178
406	chrX	2036375	2036832	458	Peak_11836	144.917	0.79245	0.325644	0.0149541	0.0930012
407	chr2L	1074111	1074565	455	Peak_169	152.939	0.792248	0.247388	0.00136262	0.0175428
408	chr2L	267365	268093	729	Peak_46	265.966	0.791047	0.310847	0.0109336	0.0749549
409	chrX	19612066	19612705	640	Peak_13941	177.802	0.790522	0.263981	0.00274794	0.0283954
410	chr2L	20831076	20831427	352	Peak_2320	125.173	0.790224	0.322411	0.0142467	0.0899467
411	chr3L	9342402	9343011	610	Peak_6383	220.826	0.789811	0.29229	0.00688932	0.05462
412	chrX	8427791	8428420	630	Peak_12611	312.393	0.788464	0.305657	0.00989222	0.0700232
413	chr2L	16493722	16494048	327	Peak_1895	115.818	0.786082	0.312931	0.0120049	0.0799826
414	chr3R	8086902	8087444	543	Peak_9198	181.853	0.784797	0.274808	0.00429288	0.03895
415	chr3R	22419577	22419893	317	Peak_10873	100.413	0.783764	0.305259	0.0102423	0.0716619
416	chr3L	4146367	4146589	223	Peak_5794	65.9192	0.783311	0.326788	0.0165299	0.0992135
417	chr3L	11342557	11343672	1116	Peak_6660	430.027	0.783163	0.305053	0.0102492	0.0716619
418	chrX	6594103	6594954	852	Peak_12385	438.99	0.782608	0.257644	0.00238504	0.0258551
419	chrX	8929206	8929629	424	Peak_12669	170.796	0.782444	0.287207	0.00644344	0.0519889
420	chr2L	14436883	14437685	803	Peak_1686	239.803	0.781002	0.274782	0.00447944	0.0401786
421	chr2L	7872194	7873085	892	Peak_952	420.518	0.779914	0.206811	0.000162502	0.00357339
422	chr2R	3314777	3315296	520	Peak_2792	268.955	0.779516	0.310067	0.0119362	0.0797778
423	chr2L	13145296	13145681	386	Peak_1549	145.357	0.777902	0.291315	0.00757798	0.0585676
424	chr2L	4889291	4889860	570	Peak_583	202.841	0.777774	0.310149	0.0121505	0.0805248
425	chr3L	1204121	1204714	594	Peak_5396	173.926	0.77771	0.272268	0.00428449	0.0388989
426	chrX	1026625	1026964	340	Peak_11686	141.573	0.776679	0.321418	0.0156743	0.0960849
427	chr3R	2817273	2819148	1876	Peak_8554	1051.33	0.775306	0.244483	0.00151808	0.0189405
428	chr3L	6935350	6936148	799	Peak_6093	254.694	0.775275	0.261522	0.00303195	0.0303109
429	chr2R	7710738	7711589	852	Peak_3424	425.346	0.774211	0.313942	0.0136593	0.0871729
430	chr3L	11335476	11336337	862	Peak_6657	678.35	0.773189	0.256174	0.00254263	0.026984
431	chrX	3664834	3665588	755	Peak_12062	394.66	0.768828	0.209707	0.00024618	0.00483333
432	chr3R	6203662	6204050	389	Peak_8986	165.173	0.767896	0.226828	0.000710817	0.0106442
433	chr2R	19101116	19101642	527	Peak_4889	150.455	0.767703	0.3207	0.0166732	0.0998153
434	chr2L	18147718	18148130	413	Peak_2012	150.759	0.765082	0.256941	0.0029046	0.0294967
435	chrX	7943334	7943655	322	Peak_12555	90.8213	0.764831	0.3175	0.0159999	0.0974442
436	chr3R	17291355	17291986	632	Peak_10253	151.443	0.763607	0.286453	0.00768215	0.0589549
437	chrX	16385133	16385429	297	Peak_13493	91.8618	0.761915	0.301033	0.0113736	0.077161
438	chr3R	25585168	25585989	822	Peak_11170	309.008	0.7605	0.295322	0.0100194	0.0705349
439	chr3R	17661629	17662193	565	Peak_10320	249.884	0.760188	0.309777	0.0141284	0.0894399
440	chr3L	20388532	20388939	408	Peak_7827	169.076	0.75928	0.284627	0.00763871	0.0587906
441	chrX	16061609	16062331	723	Peak_13452	257.523	0.758638	0.305832	0.0131174	0.0849803
442	chr3R	5252850	5253416	567	Peak_8866	163.754	0.758167	0.268429	0.00473612	0.0419485
443	chr2R	9784961	9785730	770	Peak_3678	501.218	0.757424	0.171719	1.02972e-05	0.000434512
444	chrX	15019456	15019903	448	Peak_13330	165.797	0.756389	0.239	0.00155188	0.0192096
445	chr3R	12046842	12047667	826	Peak_9659	533.102	0.75603	0.208108	0.000280273	0.00530573
446	chr3L	15222942	15224719	1778	Peak_7166	871.202	0.755544	0.261765	0.00389743	0.0364138
447	chr2R	8902158	8902564	407	Peak_3591	156.742	0.755417	0.292639	0.00984025	0.0698041
448	chr2R	7064093	7064497	405	Peak_3308	190.852	0.754615	0.267616	0.00480579	0.0423797
449	chr4	1263986	1264388	403	Peak_11564	137.843	0.754142	0.289906	0.00928629	0.0670434
450	chrX	7601884	7602409	526	Peak_12520	195.197	0.754065	0.253555	0.00293976	0.0297572
451	chr3R	27536921	27537915	995	Peak_11417	348.906	0.752802	0.238959	0.00163081	0.0198905
452	chr2R	17549439	17550021	583	Peak_4692	181.952	0.751804	0.300227	0.0122756	0.0809365
453	chr3R	6998481	6998876	396	Peak_9082	158.623	0.751556	0.308516	0.0148491	0.0924702
454	chr3L	10839821	10840524	704	Peak_6556	179.979	0.750476	0.263823	0.00444639	0.0399328
455	chr2R	6620103	6620396	294	Peak_3245	93.412	0.749474	0.271656	0.00579948	0.048083
456	chr3R	26106813	26107205	393	Peak_11257	178.641	0.748666	0.279579	0.00741002	0.0577124
457	chr3L	15663059	15663419	361	Peak_7211	129.054	0.747642	0.309683	0.0157689	0.0963726
458	chr3R	19218018	19218471	454	Peak_10496	137.318	0.746856	0.285067	0.00879464	0.0645153
459	chr2L	19143658	19144612	955	Peak_2139	878.247	0.746597	0.241214	0.00196706	0.0226446
460	chr2R	18569073	18570140	1068	Peak_4825	550.327	0.746309	0.224739	0.000897638	0.0127913
461	chr3L	4413874	4414411	538	Peak_5848	218.749	0.746154	0.256223	0.00358971	0.0342326
462	chr3R	19015918	19017476	1559	Peak_10463	992.123	0.745384	0.182745	4.52661e-05	0.00134147
463	chr3R	17173300	17173638	339	Peak_10231	152.21	0.744348	0.277598	0.00733181	0.0573561
464	chr2R	18556809	18557077	269	Peak_4820	105.859	0.74367	0.257343	0.00385482	0.0360873
465	chr3L	4225974	4226469	496	Peak_5807	168.414	0.742711	0.259144	0.00415672	0.0381344
466	chrX	16589724	16590065	342	Peak_13523	136.652	0.741592	0.248616	0.00285546	0.0292896
467	chr4	414002	414315	314	Peak_11493	136.449	0.741556	0.250258	0.00304491	0.030419
468	chr2L	2925030	2926441	1412	Peak_375	504.259	0.741359	0.247269	0.00271596	0.0281886
469	chr2L	4812214	4813358	1145	Peak_574	374.684	0.741024	0.243504	0.00234104	0.0255758
470	chr3R	11112346	11112775	430	Peak_9540	200.149	0.740304	0.257391	0.00402508	0.0373075
471	chrX	8954526	8955397	872	Peak_12673	339.346	0.740265	0.234664	0.0016073	0.01974
472	chr3R	7474506	7475223	718	Peak_9124	291.331	0.737944	0.294447	0.0122035	0.0806118
473	chr2R	19099408	19100658	1251	Peak_4888	427.029	0.737802	0.279764	0.00835853	0.0626491
474	chr2L	11441093	11441376	284	Peak_1395	97.884	0.737707	0.290536	0.011113	0.0759637
475	chrX	11321269	11321545	277	Peak_12925	90.1325	0.736105	0.279024	0.00833623	0.0625189
476	chr3R	20095687	20096277	591	Peak_10617	249.462	0.735908	0.238185	0.00200394	0.0229574
477	chr3L	8066935	8067565	631	Peak_6226	364.69	0.735242	0.255839	0.00405501	0.0374162
478	chr2L	1578902	1579748	847	Peak_224	291.651	0.734913	0.304795	0.0159013	0.0970304
479	chrX	11049892	11050507	616	Peak_12910	239.736	0.734695	0.230957	0.00146724	0.0185064
480	chr3L	11336474	11337372	899	Peak_6658	778.954	0.733783	0.263808	0.00541072	0.0459375
481	chr3R	12056082	12056444	363	Peak_9664	112.228	0.73086	0.290711	0.0119355	0.0797778
482	chrX	11526707	11527542	836	Peak_12961	691.215	0.730788	0.300862	0.0151414	0.0939217
483	chrX	8411908	8413159	1252	Peak_12609	1128.33	0.729639	0.227418	0.00133497	0.0173129
484	chr3R	18215737	18216476	740	Peak_10393	443.281	0.728971	0.224468	0.00116402	0.0156561
485	chr2L	14621291	14621575	285	Peak_1741	110.116	0.728755	0.282402	0.00986402	0.0698936
486	chrX	12559901	12561032	1132	Peak_13059	898.581	0.728623	0.214399	0.000677707	0.0102659
487	chr2R	13679949	13680517	569	Peak_4177	335.203	0.727675	0.224206	0.00117216	0.0157356
488	chr3R	19613195	19613927	733	Peak_10539	287.047	0.726382	0.271616	0.00748859	0.0580684
489	chr2L	502640	503044	405	Peak_84	172.288	0.725811	0.259744	0.00520067	0.0448546
490	chr3R	856549	857229	681	Peak_8304	265.553	0.72489	0.282326	0.0102415	0.0716619
491	chr3R	26955919	26956242	324	Peak_11343	157.518	0.723938	0.293882	0.0137642	0.0877403
492	chr3R	689592	689824	233	Peak_8268	106.693	0.723142	0.301702	0.0165356	0.0992135
493	chr2L	21883350	21883967	618	Peak_2461	190.457	0.722292	0.237723	0.00237852	0.0258041
494	chrX	1163533	1165456	1924	Peak_11709	630.119	0.722054	0.23911	0.00252984	0.0269584
495	chr2L	21935459	21935902	444	Peak_2467	153.283	0.71997	0.297243	0.0154284	0.0951811
496	chr3R	9717765	9718394	630	Peak_9359	165.668	0.719961	0.292501	0.0138397	0.0880858
497	chr3R	685149	685806	658	Peak_8267	348.723	0.719567	0.299144	0.016154	0.0977537
498	chrX	596293	596766	474	Peak_11633	226.901	0.718961	0.247145	0.00362513	0.0344388
499	chr2R	6417958	6418371	414	Peak_3210	164.841	0.718187	0.250146	0.0040908	0.0376727
500	chr3L	16889460	16889844	385	Peak_7399	140.349	0.717958	0.271827	0.00826059	0.0622783
501	chr2R	10191892	10192583	692	Peak_3752	209.622	0.717484	0.238158	0.00258992	0.0273542
502	chr2L	8276975	8277380	406	Peak_1010	224.827	0.717179	0.258413	0.00551466	0.0465712
503	chr3R	4013118	4013870	753	Peak_8690	248.779	0.716637	0.276955	0.00966596	0.0689743
504	chr3R	1531063	1531799	737	Peak_8410	221.063	0.716228	0.298698	0.0164925	0.0990811
505	chr2R	9915552	9915934	383	Peak_3713	128.529	0.716202	0.281154	0.010854	0.0745178
506	chrX	18259986	18261744	1759	Peak_13743	1068.25	0.714806	0.277822	0.0100852	0.0708923
507	chr2L	6757612	6757976	365	Peak_807	93.3668	0.714794	0.278635	0.0103074	0.0719178
508	chr3L	3892917	3893551	635	Peak_5766	283.263	0.712821	0.213932	0.000862261	0.0124887
509	chr2R	9463437	9464880	1444	Peak_3657	879.386	0.710018	0.264972	0.0073711	0.0575513
510	chrX	18845005	18845592	588	Peak_13827	250.688	0.707969	0.223487	0.0015358	0.0190843
511	chr2R	7080227	7080704	478	Peak_3316	202.845	0.706242	0.253424	0.00532307	0.045439
512	chr3L	16800145	16801077	933	Peak_7378	359.427	0.70613	0.235148	0.00267408	0.0279179
513	chr3R	12114450	12114934	485	Peak_9689	233.89	0.705064	0.278262	0.011283	0.0768285
514	chr3L	1440506	1441485	980	Peak_5432	517.597	0.70215	0.263467	0.00769804	0.0590447
515	chr3R	6456713	6457212	500	Peak_9037	236.272	0.701898	0.278086	0.0116017	0.078151
516	chr3L	11054360	11054814	455	Peak_6607	161.03	0.700701	0.272686	0.0101807	0.0713508
517	chrX	16017837	16018649	813	Peak_13440	416.886	0.700234	0.239788	0.00349783	0.0336134
518	chrX	19323090	19323677	588	Peak_13896	147.265	0.699452	0.276616	0.0114518	0.0775301
519	chr2R	4541140	4541443	304	Peak_2958	113.054	0.699367	0.286503	0.0146448	0.0914392
520	chr2L	9120640	9121252	613	Peak_1108	222.059	0.697933	0.269291	0.00954899	0.068312
521	chrX	10680706	10681131	426	Peak_12866	198.434	0.69753	0.229127	0.00233226	0.0255375
522	chr2R	19457323	19457904	582	Peak_4930	165.74	0.696937	0.256007	0.00648219	0.0522284
523	chr3R	12047785	12048519	735	Peak_9660	528.704	0.696896	0.188169	0.000212593	0.0043781
524	chr3L	16870229	16870620	392	Peak_7394	138.814	0.696823	0.272149	0.0104537	0.072616
525	chr3R	13532301	13533022	722	Peak_9847	300.645	0.696458	0.240489	0.00377938	0.0356169
526	chr3L	7588352	7588858	507	Peak_6157	215.171	0.695637	0.274568	0.0112907	0.0768443
527	chr2L	22179599	22180092	494	Peak_2489	198.795	0.694492	0.226458	0.00216395	0.0242017
528	chr3L	18050078	18050546	469	Peak_7556	252.206	0.694095	0.245235	0.00464999	0.0413931
529	chr2L	5974097	5974379	283	Peak_709	113.424	0.693362	0.263319	0.00845929	0.0630699
530	chr2L	20325987	20326900	914	Peak_2271	257.374	0.692996	0.255543	0.00669069	0.0532543
531	chrX	6768914	6769458	545	Peak_12422	450.536	0.691343	0.282657	0.0144502	0.090625
532	chr2R	6763044	6763484	441	Peak_3266	156.437	0.690949	0.21908	0.00161122	0.019771
533	chrX	17572272	17573062	791	Peak_13649	289.046	0.690725	0.230909	0.00277771	0.028682
534	chr3L	14797773	14798395	623	Peak_7107	461.808	0.690589	0.239348	0.00391043	0.0365112
535	chr3L	14335550	14336315	766	Peak_7036	368.197	0.690548	0.239919	0.00399889	0.0370921
536	chr2L	8473069	8473979	911	Peak_1049	805.37	0.690001	0.235261	0.00335788	0.0326596
537	chr3R	17683058	17683940	883	Peak_10327	373.897	0.68944	0.264617	0.00917587	0.066518
538	chr2R	13023655	13024232	578	Peak_4105	198.298	0.688866	0.286801	0.0163103	0.0983729
539	chr3R	11495832	11496064	233	Peak_9593	108.923	0.688641	0.274182	0.0120178	0.0799826
540	chr3R	5909740	5910430	691	Peak_8958	800.22	0.688529	0.2263	0.00234586	0.0255872
541	chr3R	24894306	24895684	1379	Peak_11066	1046.5	0.688443	0.214717	0.00134461	0.017406
542	chr2L	12718744	12720540	1797	Peak_1514	695.815	0.686545	0.252404	0.00652763	0.0523693
543	chr2R	5816978	5817736	759	Peak_3126	574.102	0.68421	0.273585	0.0123876	0.0815608
544	chr3R	27886677	27887343	667	Peak_11461	220.932	0.684141	0.282157	0.0153218	0.0947876
545	chrX	10523165	10523599	435	Peak_12846	181.228	0.683691	0.250375	0.00632074	0.0512916
546	chr3L	11063390	11064133	744	Peak_6610	421.77	0.683132	0.214468	0.00144632	0.0184024
547	chrX	13127442	13128817	1376	Peak_13118	1187.07	0.68259	0.225942	0.00251868	0.0269584
548	chr3L	139865	140086	222	Peak_5197	156.981	0.682444	0.243546	0.00507681	0.044161
549	chr2R	20438482	20439178	697	Peak_5083	228.592	0.682167	0.263478	0.00962323	0.0687735
550	chr3R	21340302	21340781	480	Peak_10749	209.357	0.681541	0.254985	0.00752053	0.0582522
551	chr3R	17282297	17283000	704	Peak_10251	427.658	0.679774	0.236449	0.00404122	0.0373621
552	chr2R	12936380	12936921	542	Peak_4090	184.008	0.678181	0.240402	0.00478697	0.0422664
553	chr3L	10708600	10710346	1747	Peak_6532	1975.78	0.677621	0.225126	0.00261283	0.0274814
554	chr3L	647053	647567	515	Peak_5301	214.458	0.677411	0.258174	0.00869399	0.0640763
555	chr2R	17262371	17263476	1106	Peak_4645	326.837	0.67723	0.209956	0.00125715	0.016593
556	chr2R	10917214	10917964	751	Peak_3844	452.863	0.676771	0.272647	0.0130567	0.0848686
557	chr2R	8150175	8150669	495	Peak_3487	152.795	0.676623	0.262272	0.00988434	0.0700025
558	chr3L	16152886	16153199	314	Peak_7272	147.486	0.675903	0.274419	0.0137768	0.0877642
559	chr3R	19140857	19141353	497	Peak_10482	225.68	0.675708	0.217366	0.00187961	0.0219989
560	chrX	17700046	17700950	905	Peak_13675	339.442	0.675703	0.246545	0.0061311	0.0501558
561	chrX	15030931	15031670	740	Peak_13332	242.903	0.675664	0.273971	0.0136559	0.0871729
562	chrX	12630993	12632062	1070	Peak_13075	1105.76	0.67555	0.198625	0.000671071	0.0102003
563	chr3R	8890882	8891438	557	Peak_9269	368.236	0.675521	0.224891	0.00266654	0.0278803
564	chr3L	311459	311954	496	Peak_5236	172.094	0.675326	0.273267	0.0134619	0.0864341
565	chrX	12101192	12101692	501	Peak_13020	244.891	0.67407	0.230495	0.00345071	0.0332964
566	chr3R	17739121	17739974	854	Peak_10338	580.069	0.673968	0.231018	0.00352979	0.0338632
567	chr3R	25359420	25359951	532	Peak_11139	218.975	0.673483	0.275092	0.0143568	0.0902391
568	chr2R	14285495	14286269	775	Peak_4275	249.609	0.673352	0.220263	0.00223534	0.0246673
569	chrX	8301673	8301971	299	Peak_12594	153.736	0.672308	0.25647	0.00875729	0.0643885
570	chr2R	6987859	6988526	668	Peak_3298	479.103	0.671838	0.205421	0.00107341	0.0147604
571	chr2R	17248109	17248618	510	Peak_4639	208.464	0.669252	0.262935	0.010918	0.0749039
572	chr2L	3855997	3856367	371	Peak_490	111.671	0.668936	0.261902	0.010645	0.0737636
573	chr2L	14627471	14628016	546	Peak_1743	190.927	0.668849	0.275919	0.0153471	0.0948606
574	chrX	6627463	6628055	593	Peak_12391	196.114	0.668382	0.266503	0.0121426	0.0805099
575	chrX	4601109	4602043	935	Peak_12183	323.75	0.668275	0.241196	0.00559413	0.0469588
576	chr2L	18327024	18327532	509	Peak_2021	316.555	0.667239	0.258788	0.00992812	0.0701518
577	chr3L	8852304	8853021	718	Peak_6341	268.851	0.665838	0.23735	0.00502698	0.043784
578	chrX	17265521	17265743	223	Peak_13608	96.3769	0.665457	0.252226	0.00833139	0.0625189
579	chr3R	12039793	12040545	753	Peak_9656	311.266	0.663847	0.265665	0.0124611	0.0819302
580	chrX	16687163	16687623	461	Peak_13540	185.411	0.66327	0.249677	0.00789548	0.060135
581	chr3L	16888544	16888903	360	Peak_7398	146.168	0.662497	0.260049	0.0108471	0.0745064
582	chr2R	19473258	19474350	1093	Peak_4934	339.129	0.661309	0.233206	0.00457206	0.0408796
583	chr3L	685129	685890	762	Peak_5313	342.052	0.660563	0.214747	0.00209788	0.0236112
584	chrX	8801409	8801841	433	Peak_12663	296.686	0.660381	0.19124	0.000554092	0.00891085
585	chr3R	22060519	22061669	1151	Peak_10842	390.886	0.659654	0.267034	0.0134999	0.0864399
586	chrX	6442034	6442557	524	Peak_12360	189.648	0.658918	0.274758	0.0164771	0.0990307
587	chr3L	16794524	16795530	1007	Peak_7376	658.247	0.657494	0.252255	0.00914821	0.0664538
588	chrX	21102200	21102689	490	Peak_14049	228.005	0.656544	0.23998	0.00622222	0.0506959
589	chr2R	3646122	3646737	616	Peak_2849	265.943	0.655558	0.193893	0.000722149	0.0107682
590	chr2L	14495616	14496023	408	Peak_1699	223.569	0.654196	0.209926	0.00183123	0.0215756
591	chr2R	7552802	7553421	620	Peak_3405	661.872	0.654001	0.263496	0.0130641	0.0848686
592	chr3L	8689582	8690035	454	Peak_6315	167.658	0.653942	0.253716	0.00995306	0.0702297
593	chr3R	16890622	16891200	579	Peak_10188	361.718	0.652422	0.197952	0.00098121	0.0137045
594	chr3L	16806916	16807332	417	Peak_7382	125.41	0.652071	0.249404	0.00893535	0.0653188
595	chr2R	14058678	14060069	1392	Peak_4218	553.249	0.651538	0.178749	0.000267396	0.0051149
596	chr2L	8291985	8292822	838	Peak_1016	468.836	0.651052	0.252053	0.00979449	0.0696453
597	chr3L	70553	71840	1288	Peak_5192	947.226	0.650334	0.205235	0.00153109	0.0190691
598	chr3L	1007617	1008377	761	Peak_5375	296.703	0.649077	0.203574	0.00143061	0.0182683
599	chr2L	20242569	20243072	504	Peak_2266	287.416	0.648235	0.265159	0.0144971	0.090805
600	chrX	18298182	18299419	1238	Peak_13749	745.545	0.646205	0.178145	0.000286289	0.00540318
601	chr2L	16321349	16321751	403	Peak_1869	174.216	0.645782	0.236701	0.00636682	0.0516063
602	chr2L	19071618	19072306	689	Peak_2126	211.298	0.645423	0.193798	0.000867264	0.0125354
603	chr2L	9906933	9908061	1129	Peak_1198	610.045	0.644212	0.247791	0.00932726	0.0671341
604	chr3R	17662252	17662742	491	Peak_10321	212.119	0.643422	0.267371	0.0161072	0.0975731
605	chrX	9825869	9826799	931	Peak_12776	282.766	0.642314	0.238638	0.00711134	0.0559721
606	chr3L	15109652	15110019	368	Peak_7134	146.814	0.641954	0.241823	0.00793909	0.0603047
607	chr2L	2462057	2462661	605	Peak_326	221.895	0.64174	0.227298	0.0047527	0.042069
608	chr3R	3933682	3934034	353	Peak_8668	128.823	0.640775	0.261671	0.0143341	0.0902391
609	chr2R	5933141	5933567	427	Peak_3146	156.484	0.640768	0.258834	0.0133016	0.0858592
610	chr3L	166823	167403	581	Peak_5204	237.04	0.639815	0.245729	0.00922108	0.0667431
611	chr3R	15144853	15145319	467	Peak_10039	178.828	0.636201	0.234432	0.00665165	0.0530331
612	chr3R	12065039	12065754	716	Peak_9668	209.549	0.635437	0.239062	0.00785945	0.0599574
613	chr2R	11016638	11017673	1036	Peak_3857	839.486	0.635255	0.227112	0.00515641	0.0446089
614	chr3R	14272762	14273478	717	Peak_9921	963.503	0.634171	0.264386	0.0164554	0.0989859
615	chr2R	18785407	18787066	1660	Peak_4846	915.683	0.634151	0.248507	0.0107155	0.0738462
616	chrX	21102881	21103257	377	Peak_14050	196.189	0.630255	0.261892	0.0161042	0.0975731
617	chr3L	3307615	3308165	551	Peak_5678	222.883	0.630081	0.249595	0.011589	0.0781221
618	chr3L	7971758	7972673	916	Peak_6204	629.235	0.62897	0.200587	0.00171479	0.0205426
619	chr2R	8903011	8903622	612	Peak_3592	628.272	0.628482	0.213074	0.00318187	0.0314758
620	chr2L	13211824	13212156	333	Peak_1562	125.751	0.628258	0.250594	0.0121736	0.0805644
621	chr2R	8906607	8907313	707	Peak_3593	458.713	0.627679	0.255528	0.0140338	0.0890003
622	chr2R	19474424	19475623	1200	Peak_4935	556.761	0.625703	0.210546	0.00296053	0.0297865
623	chr3L	22830644	22831962	1319	Peak_8156	873.282	0.625633	0.212759	0.003276	0.0322042
624	chr2L	9182481	9183701	1221	Peak_1122	913.198	0.624067	0.228896	0.0064026	0.0518072
625	chr2R	10368254	10370363	2110	Peak_3782	1638.49	0.624053	0.145869	1.88434e-05	0.000693671
626	chr2R	7817741	7818122	382	Peak_3442	160.77	0.623163	0.247623	0.0118499	0.079389
627	chr2L	7023222	7024656	1435	Peak_840	584.29	0.622609	0.187581	0.000902941	0.012854
628	chr2L	9657397	9657686	290	Peak_1166	104.799	0.622417	0.235932	0.00833674	0.0625189
629	chr2L	4594816	4595391	576	Peak_555	483.416	0.621019	0.251782	0.0136441	0.0871729
630	chrX	9364098	9364485	388	Peak_12723	153.719	0.620701	0.236409	0.00865129	0.0639504
631	chr3L	3300167	3301404	1238	Peak_5676	523.417	0.620133	0.252278	0.0139661	0.0887304
632	chr2R	7501442	7502250	809	Peak_3387	751.662	0.61945	0.197818	0.00173967	0.0207702
633	chr3R	1486040	1486808	769	Peak_8404	282.922	0.619031	0.247067	0.0122272	0.0807305
634	chrX	8316520	8316924	405	Peak_12600	169.462	0.618509	0.221008	0.00513283	0.0444594
635	chr3R	12089585	12090162	578	Peak_9679	264.447	0.618165	0.226182	0.00627531	0.0510322
636	chr2R	14117104	14118249	1146	Peak_4232	652.009	0.613526	0.217562	0.00480235	0.0423758
637	chr3L	9688280	9688784	505	Peak_6433	310.14	0.613486	0.219012	0.00509197	0.0441866
638	chrX	1055988	1056301	314	Peak_11688	136.393	0.613211	0.24747	0.0132152	0.0854968
639	chr2R	13814474	13815032	559	Peak_4199	243.986	0.612249	0.245714	0.0127126	0.0831716
640	chr2R	13323121	13323579	459	Peak_4125	275.161	0.611434	0.228254	0.0073899	0.057651
641	chrX	3345232	3345727	496	Peak_12027	249.614	0.609652	0.253716	0.016266	0.0982633
642	chr3R	26172857	26173419	563	Peak_11272	251.934	0.609417	0.252754	0.015904	0.0970304
643	chr3L	16908999	16909460	462	Peak_7401	258.954	0.609115	0.242483	0.0120051	0.0799826
644	chr2L	9175223	9175541	319	Peak_1119	163.449	0.608772	0.223435	0.00643788	0.0519737
645	chr2R	16048592	16049254	663	Peak_4505	353.957	0.608742	0.246999	0.0137185	0.087511
646	chr3L	881682	882356	675	Peak_5370	289.61	0.60805	0.213129	0.00433125	0.0391661
647	chr2L	16520114	16521861	1748	Peak_1897	1095.4	0.607132	0.158275	0.000125089	0.00298693
648	chr2R	2902358	2903608	1251	Peak_2728	403.675	0.606511	0.192969	0.00167203	0.020167
649	chr2R	5452322	5453700	1379	Peak_3087	1434.18	0.605617	0.234977	0.00995616	0.0702297
650	chr3R	7575209	7576070	862	Peak_9136	364.371	0.605336	0.177416	0.000644972	0.00994256
651	chrX	3666633	3667905	1273	Peak_12063	861.722	0.604055	0.184318	0.00104826	0.014542
652	chrX	13172663	13173062	400	Peak_13130	218.242	0.603746	0.235876	0.0104795	0.0727593
653	chr3L	680338	680542	205	Peak_5311	138.345	0.601142	0.245506	0.0143418	0.0902391
654	chrX	3671127	3671698	572	Peak_12065	409.753	0.600863	0.193882	0.00194102	0.0224903
655	chrX	6747259	6747805	547	Peak_12412	268.973	0.600767	0.240758	0.0125846	0.0826272
656	chr3R	14299094	14300562	1469	Peak_9929	1654.08	0.600701	0.209508	0.0041413	0.0380633
657	chr3R	10198484	10199667	1184	Peak_9428	877.143	0.599399	0.204721	0.00341285	0.0330439
658	chrX	17698058	17699051	994	Peak_13674	424.012	0.597195	0.233017	0.0103808	0.0722514
659	chrX	3644082	3645709	1628	Peak_12058	1188.32	0.595364	0.223698	0.00778017	0.0595777
660	chr2L	9895371	9895952	582	Peak_1195	176.56	0.591058	0.241408	0.0143499	0.0902391
661	chr3L	626308	627395	1088	Peak_5293	814.47	0.58966	0.192508	0.00219104	0.024407
662	chr2R	5747371	5748553	1183	Peak_3119	738.569	0.588319	0.234226	0.0120133	0.0799826
663	chr4	1000293	1001106	814	Peak_11545	571.11	0.588284	0.206644	0.00441544	0.0397558
664	chr2L	12504874	12505308	435	Peak_1472	212.365	0.586225	0.210127	0.00527309	0.045176
665	chr2L	19423381	19424191	811	Peak_2177	399.625	0.586162	0.211811	0.00565092	0.0472671
666	chrX	6177392	6177923	532	Peak_12328	240.66	0.576162	0.214417	0.00720734	0.0566016
667	chr3L	11480312	11481132	821	Peak_6685	575.347	0.574278	0.207406	0.00562538	0.0471371
668	chr3R	22896840	22897362	523	Peak_10916	183.469	0.573011	0.199271	0.00403338	0.0373377
669	chr3R	7515595	7516099	505	Peak_9133	297.594	0.572545	0.214935	0.00772614	0.0592281
670	chrX	9380037	9381015	979	Peak_12727	535.378	0.571552	0.235177	0.015086	0.0936976
671	chr2R	7126736	7127016	281	Peak_3324	98.5358	0.570744	0.238183	0.0165642	0.0993431
672	chr2L	3477699	3478861	1163	Peak_428	684.241	0.570617	0.227036	0.0119596	0.0798964
673	chr2R	6305406	6306453	1048	Peak_3195	659.494	0.569737	0.233173	0.0145491	0.091003
674	chr2L	426125	426776	652	Peak_68	235.809	0.569258	0.22593	0.0117482	0.0789317
675	chrX	14841016	14842267	1252	Peak_13308	721.147	0.567845	0.222874	0.0108394	0.0744898
676	chr2L	18677030	18677776	747	Peak_2069	334.946	0.567525	0.203352	0.00525704	0.045111
677	chr3R	17478490	17478909	420	Peak_10294	240.23	0.567176	0.215104	0.00837029	0.062704
678	chr3R	20881742	20882921	1180	Peak_10702	541.09	0.566034	0.20325	0.0053542	0.0456496
679	chr3R	7638481	7639074	594	Peak_9147	212.475	0.56392	0.216382	0.00915713	0.0664844
680	chr3L	629551	630296	746	Peak_5296	357.98	0.562499	0.224234	0.0121231	0.0805022
681	chr3R	14273675	14275073	1399	Peak_9922	1825.13	0.561654	0.221512	0.011227	0.0765213
682	chrX	11510136	11510758	623	Peak_12958	270.316	0.561146	0.230928	0.0151004	0.093746
683	chrX	2919813	2920244	432	Peak_11959	252.573	0.560534	0.209444	0.00744404	0.0578499
684	chr3L	16030185	16030551	367	Peak_7251	126.73	0.559062	0.228442	0.0143939	0.0903918
685	chr2L	5151098	5151860	763	Peak_623	305.657	0.557662	0.213528	0.00901039	0.065689
686	chr3L	16996585	16997242	658	Peak_7416	260.799	0.557133	0.224458	0.0130602	0.0848686
687	chrX	11814828	11815519	692	Peak_13004	457.18	0.556583	0.209046	0.0077565	0.0594286
688	chr2R	14664741	14665147	407	Peak_4331	205.346	0.55657	0.226649	0.0140632	0.0891469
689	chrX	255455	255859	405	Peak_11589	177.163	0.556011	0.225719	0.0137668	0.0877403
690	chrX	12797111	12797693	583	Peak_13093	297.402	0.555606	0.191888	0.00378591	0.0356547
691	chrX	17551208	17553446	2239	Peak_13648	1381.77	0.555586	0.157826	0.000431155	0.00736978
692	chr2L	19546754	19547537	784	Peak_2198	290.854	0.553695	0.178817	0.00195859	0.0226198
693	chr3L	9454774	9456288	1515	Peak_6412	999.878	0.55313	0.164729	0.000785617	0.0115322
694	chr4	523092	523742	651	Peak_11507	271.768	0.550922	0.190577	0.00384251	0.0360096
695	chr2R	11418991	11419985	995	Peak_3906	390.813	0.550385	0.196913	0.00518881	0.0448039
696	chr3R	21849748	21850728	981	Peak_10806	439.832	0.549683	0.218401	0.0118409	0.0793684
697	chr2L	2858052	2858459	408	Peak_363	221.234	0.547004	0.199846	0.00619775	0.0505548
698	chrX	7826915	7827896	982	Peak_12541	511.923	0.546444	0.206926	0.00827176	0.0623292
699	chr3L	16374535	16374919	385	Peak_7316	169.313	0.54567	0.197392	0.0057029	0.0475612
700	chr3L	20502183	20503164	982	Peak_7850	559.035	0.545373	0.189374	0.00397847	0.0369754
701	chr3L	19009173	19010107	935	Peak_7675	504.577	0.544708	0.223515	0.0148093	0.092263
702	chrX	2035229	2036218	990	Peak_11835	575.693	0.543832	0.174227	0.00179998	0.0213461
703	chr2R	14706764	14707357	594	Peak_4339	183.763	0.54268	0.20292	0.0074874	0.0580684
704	chr3L	10667153	10667709	557	Peak_6517	494.215	0.542651	0.211138	0.0101662	0.0713102
705	chr3L	7847784	7848935	1152	Peak_6187	729.941	0.541302	0.162418	0.000859827	0.0124662
706	chr3L	7351899	7353381	1483	Peak_6140	539.327	0.540241	0.22514	0.0164139	0.0988192
707	chr3R	25517538	25518247	710	Peak_11160	253.984	0.53759	0.217014	0.0132415	0.0855879
708	chr3R	21384995	21385390	396	Peak_10759	154.712	0.536969	0.216378	0.0130786	0.0848947
709	chr3R	5399036	5400432	1397	Peak_8888	606.774	0.53561	0.180939	0.00307475	0.030691
710	chr3L	11529592	11530702	1111	Peak_6690	460.11	0.534843	0.220194	0.015142	0.0939217
711	chrX	13024832	13025973	1142	Peak_13107	1248.87	0.533761	0.211567	0.0116394	0.0783499
712	chr2L	2885722	2887125	1404	Peak_369	850.354	0.533441	0.209137	0.0107515	0.0739934
713	chr2R	7037356	7037772	417	Peak_3305	204.078	0.533146	0.218237	0.0145672	0.0910352
714	chrX	18820812	18821331	520	Peak_13817	203.543	0.531335	0.207377	0.010402	0.0723281
715	chr3R	20391160	20391901	742	Peak_10641	370.191	0.521467	0.215456	0.0155079	0.0953956
716	chrX	13518278	13519822	1545	Peak_13179	1406.81	0.520416	0.185155	0.00494327	0.0432681
717	chr2R	12697806	12698663	858	Peak_4063	275.517	0.519803	0.212051	0.0142339	0.0899062
718	chr3R	10522299	10523313	1015	Peak_9478	928.109	0.517005	0.17187	0.00262867	0.0276069
719	chr3R	4496605	4497172	568	Peak_8747	215.258	0.516121	0.213338	0.0155517	0.0954992
720	chr3L	16043959	16044441	483	Peak_7257	304.532	0.515884	0.194101	0.00786506	0.0599679
721	chrX	4891317	4892564	1248	Peak_12195	471.903	0.514647	0.192166	0.00740338	0.0576931
722	chr2R	4778550	4779328	779	Peak_2987	342.062	0.511234	0.208984	0.0144339	0.0905627
723	chr2L	540015	541265	1251	Peak_97	819.075	0.50988	0.20352	0.0122346	0.0807417
724	chrX	18586709	18587561	853	Peak_13786	454.701	0.507275	0.200563	0.0114307	0.0774613
725	chr2L	6085495	6086257	763	Peak_730	791.914	0.506379	0.209632	0.0157109	0.0962257
726	chr2R	20560168	20561428	1261	Peak_5101	670.618	0.505135	0.197892	0.0106927	0.0738462
727	chr3R	5243311	5245400	2090	Peak_8865	1675.21	0.50449	0.178079	0.00461207	0.0411333
728	chr3R	20476572	20477370	799	Peak_10657	536.881	0.501701	0.182617	0.00600923	0.0493994
729	chrX	1973985	1974942	958	Peak_11818	583.191	0.501402	0.175056	0.00418	0.0381848

## Sheet: DRMS
	Peak Attributes						Young Undamaged vs. Young Damaged				Young damaged vs. Old damaged
Rank	Chr	Start	End	Width	Peak ID	BaseMean	log2 Fold Change	Standard Error	P Value	Adjusted P Value	log2 Fold Change	Standard Error	P Value	Adjusted P Value
1	chr2R	19460551	19461404	854	Peak_4931	391.2	-1.12674	0.260739	1.55099e-05	0.00519829	0.939304	0.257249	0.000260877	0.00502419
2	chr3L	18750108	18750734	627	Peak_7631	332.456	-1.12512	0.333087	0.000730532	0.0422147	1.10284	0.331427	0.00087612	0.0125734
3	chrX	9534737	9535581	845	Peak_12747	320.901	-1.11724	0.282166	7.50996e-05	0.0136453	1.10243	0.279045	7.7911e-05	0.00203577
4	chrX	6768914	6769458	545	Peak_12422	450.536	-1.0362	0.285231	0.000280322	0.0246726	0.691343	0.282657	0.0144502	0.090625
5	chrX	20041420	20042328	909	Peak_13977	250.17	-1.02107	0.316271	0.00124459	0.0610756	1.46614	0.314371	3.10554e-06	0.0001749
6	chr3R	17029537	17030200	664	Peak_10212	307.765	-1.00128	0.275287	0.000275616	0.0246726	0.947883	0.271824	0.000488257	0.00807252
7	chr2L	20242569	20243072	504	Peak_2266	287.416	-0.996086	0.269786	0.000222385	0.021922	0.648235	0.265159	0.0144971	0.090805
8	chr2L	16612613	16613445	833	Peak_1914	343.701	-0.987678	0.281622	0.000453003	0.0308595	0.850965	0.278599	0.0022548	0.0248626
9	chrX	17572272	17573062	791	Peak_13649	289.046	-0.875807	0.236183	0.00020876	0.0213318	0.690725	0.230909	0.00277771	0.028682
10	chr2L	4626921	4627999	1079	Peak_561	426.044	-0.875124	0.279506	0.0017423	0.0710201	0.83598	0.277079	0.00255192	0.0270623
11	chrX	16419606	16420622	1017	Peak_13494	476.878	-0.855744	0.238816	0.000339316	0.0258466	0.829277	0.235822	0.000437216	0.00744637
12	chr2R	5816978	5817736	759	Peak_3126	574.102	-0.82252	0.27561	0.00284175	0.0856512	0.68421	0.273585	0.0123876	0.0815608
13	chrX	3664834	3665588	755	Peak_12062	394.66	-0.815404	0.213994	0.000138738	0.0176399	0.768828	0.209707	0.00024618	0.00483333
14	chr3R	17683058	17683940	883	Peak_10327	373.897	-0.781558	0.26752	0.00348356	0.0943299	0.68944	0.264617	0.00917587	0.066518
15	chr3R	14275856	14276432	577	Peak_9923	446.804	-0.752892	0.189036	6.811e-05	0.0132719	1.00306	0.185265	6.15655e-08	7.85229e-06
16	chr3L	21272907	21273527	621	Peak_7967	250.614	-0.732216	0.237477	0.00204713	0.076814	0.813388	0.232672	0.00047253	0.00788629
17	chr3R	8198307	8199062	756	Peak_9214	397.456	-0.729897	0.254748	0.00416776	0.0989911	0.901388	0.252181	0.000351069	0.00625975
18	chr2R	10368254	10370363	2110	Peak_3782	1638.49	-0.704788	0.147769	1.84647e-06	0.00193395	0.624053	0.145869	1.88434e-05	0.000693671
19	chr3L	881682	882356	675	Peak_5370	289.61	-0.70239	0.218828	0.00132834	0.0625291	0.60805	0.213129	0.00433125	0.0391661
20	chrX	3671127	3671698	572	Peak_12065	409.753	-0.701999	0.198595	0.000408047	0.0292316	0.600863	0.193882	0.00194102	0.0224903
21	chr2R	8903011	8903622	612	Peak_3592	628.272	-0.68966	0.2158	0.00139427	0.0638393	0.628482	0.213074	0.00318187	0.0314758
22	chr3L	11480312	11481132	821	Peak_6685	575.347	-0.645561	0.210477	0.00216121	0.0769812	0.574278	0.207406	0.00562538	0.0471371
23	chrX	18586709	18587561	853	Peak_13786	454.701	-0.628094	0.204814	0.00216463	0.0769812	0.507275	0.200563	0.0114307	0.0774613
24	chr3R	10522299	10523313	1015	Peak_9478	928.109	-0.626127	0.17455	0.000334377	0.0258466	0.517005	0.17187	0.00262867	0.0276069
25	chr4	1000293	1001106	814	Peak_11545	571.11	-0.623279	0.20969	0.00295492	0.087799	0.588284	0.206644	0.00441544	0.0397558
26	chr3L	1007617	1008377	761	Peak_5375	296.703	-0.619039	0.208868	0.00303889	0.0887207	0.649077	0.203574	0.00143061	0.0182683
27	chr3R	10198484	10199667	1184	Peak_9428	877.143	-0.611769	0.20678	0.0030909	0.0893056	0.599399	0.204721	0.00341285	0.0330439
28	chr2L	16520114	16521861	1748	Peak_1897	1095.4	-0.509068	0.16044	0.00150903	0.0655137	0.607132	0.158275	0.000125089	0.00298693

## Sheet: LL3 Damage responsive
	Peak Attributes						Old Undamaged vs. Old Damaged
Rank	Chr	Start	End	Width	Peak ID	BaseMean	log2 Fold Change	Standard Error	P Value	Adjusted P Value
1	chr2L	3090311	3090852	542	Peak_397	414.862	-1.68821	0.212116	1.73535e-15	2.45309e-11
2	chr2R	5970070	5970582	513	Peak_3159	160.486	-1.57031	0.293355	8.65375e-08	0.000611647
3	chr2R	5274836	5275387	552	Peak_3058	258.429	-1.35395	0.279247	1.24344e-06	0.00292954
4	chr3R	19918346	19919176	831	Peak_10588	504.893	-1.32454	0.275985	1.59211e-06	0.00321516
5	chrX	12440080	12440559	480	Peak_13039	224.832	-1.28741	0.312271	3.74394e-05	0.0322196
6	chr2L	6411913	6412430	518	Peak_752	209.841	-1.13712	0.28441	6.38354e-05	0.0379966
7	chr2R	8140272	8140688	417	Peak_3482	227.395	-1.13144	0.278723	4.92072e-05	0.0354764
8	chrX	4317789	4318509	721	Peak_12130	440.923	-1.11538	0.272105	4.14789e-05	0.0325747
9	chr3L	17026559	17027984	1426	Peak_7424	930.82	-1.08041	0.303367	0.000368899	0.0971141
10	chrX	20885476	20886216	741	Peak_14026	239.535	-1.07667	0.266939	5.49721e-05	0.0370041
11	chr3L	4188189	4188638	450	Peak_5803	108.036	-1.06766	0.298596	0.000349405	0.0971141
12	chr2L	6423189	6423798	610	Peak_753	239.851	-1.02082	0.27162	0.000171099	0.0653641
13	chr2R	16727066	16727706	641	Peak_4573	237.118	-0.988589	0.218753	6.20739e-06	0.00974974
14	chr3L	7821027	7821628	602	Peak_6184	325.817	-0.941239	0.188923	6.28848e-07	0.00177788
15	chr2L	8291985	8292822	838	Peak_1016	468.836	-0.901808	0.252726	0.000359269	0.0971141
16	chr2L	9567432	9567960	529	Peak_1158	436.383	-0.901095	0.235774	0.000132451	0.0603979
17	chr3R	22310384	22311065	682	Peak_10857	362.463	-0.894661	0.201245	8.76305e-06	0.012103
18	chr2R	15032078	15032636	559	Peak_4374	178.761	-0.880871	0.248272	0.000388151	0.099762
19	chr2L	16534180	16534637	458	Peak_1900	283.829	-0.858113	0.231421	0.000208888	0.0686709
20	chr2L	21618625	21619307	683	Peak_2415	286.454	-0.847687	0.231214	0.000246143	0.0756408
21	chrX	15041044	15041718	675	Peak_13334	251.863	-0.844387	0.222943	0.000152192	0.0651934
22	chr2R	18909727	18910861	1135	Peak_4861	803.092	-0.839544	0.217613	0.000114334	0.0577223
23	chr2R	17500213	17500877	665	Peak_4684	358.909	-0.828874	0.164354	4.57767e-07	0.00177788
24	chrX	19273462	19274222	761	Peak_13890	204.281	-0.828348	0.221183	0.000180334	0.0653641
25	chr3L	18764182	18765278	1097	Peak_7638	999.719	-0.817669	0.223934	0.00026083	0.0784489
26	chr3R	9200484	9201136	653	Peak_9293	277.289	-0.781473	0.198111	7.99241e-05	0.0451923
27	chr2R	11684688	11685572	885	Peak_3934	354.429	-0.762883	0.198731	0.000123656	0.0602759
28	chr3R	10957185	10957893	709	Peak_9517	881.519	-0.760304	0.198553	0.000128549	0.0603979
29	chrX	1737789	1738552	764	Peak_11774	313.606	-0.747298	0.168686	9.41801e-06	0.012103
30	chr3R	22896840	22897362	523	Peak_10916	183.469	-0.714832	0.200723	0.000369046	0.0971141
31	chr3R	9641949	9642542	594	Peak_9343	217.012	-0.707508	0.198743	0.000370979	0.0971141
32	chr2L	1642992	1643992	1001	Peak_231	952.503	-0.675416	0.179889	0.000173605	0.0653641
33	chr2R	5276898	5277814	917	Peak_3060	385.704	-0.658038	0.164687	6.45104e-05	0.0379966
