# Supplementary material for: Damage-responsive, maturity-silenced enhancers regulate multiple genes that direct regeneration in Drosophila
Source: eLife. 2020 Jun 3;9:e58305. doi: 10.7554/eLife.58305 (PMC7299344; doi:10.7554/eLife.58305)
Supplement: Supplementary file 3. — For each peak the closest two genes are shown, with the chromosome, start and stop coordinates, gene name, Flybase gene ID, the distance of the peak to the gene and the number of peaks associated with that gene. [file elife-58305-supp3.xlsx]

## Sheet: DRMS peak genes
Peak Attributes							Young Undamaged vs. Young Damaged				Young damaged vs. Old damaged				Gene Attributes
Rank	Chr.	Start	End	Width	Peak ID	Base Mean	Log2FC in accessibility	Log2FC Standard error	P-value	Adjusted P-value	log2 Fold Change	Standard Error	P Value	Adjusted P Value	Chr.	Start	End	Gene ID	FBgn	Distance peak-gene	Total peaks at gene
1	chr2R	19460551	19461404	854	Peak_4931	391.2	-1.12674	0.260739	1.55099e-05	0.00519829	0.939304	0.257249	0.000260877	0.00502419	chr2R	19452413	19487049	apt	FBgn0015903	0	1
	chr2R	19460551	19461404	854	Peak_4931	391.2	-1.12674	0.260739	1.55099e-05	0.00519829	0.939304	0.257249	0.000260877	0.00502419	chr2R	19451495	19452303	CG30184	FBgn0050184	-8249	1
2	chr3L	18750108	18750734	627	Peak_7631	332.456	-1.12512	0.333087	0.000730532	0.0422147	1.10284	0.331427	0.00087612	0.0125734	chr3L	18743706	18758844	ftz-f1	FBgn0001078	0	3
	chr3L	18750108	18750734	627	Peak_7631	332.456	-1.12512	0.333087	0.000730532	0.0422147	1.10284	0.331427	0.00087612	0.0125734	chr3L	18741786	18743583	Atg3	FBgn0036813	-6526	3
3	chrX	9534737	9535581	845	Peak_12747	320.901	-1.11724	0.282166	7.50996e-05	0.0136453	1.10243	0.279045	7.7911e-05	0.00203577	chrX	9520326	9534657	Ptpmeg2	FBgn0028341	-81	2
	chrX	9534737	9535581	845	Peak_12747	320.901	-1.11724	0.282166	7.50996e-05	0.0136453	1.10243	0.279045	7.7911e-05	0.00203577	chrX	9553127	9556936	CG3106	FBgn0030148	17547	2
4	chrX	6768914	6769458	545	Peak_12422	450.536	-1.0362	0.285231	0.000280322	0.0246726	0.691343	0.282657	0.0144502	0.090625	chrX	6757920	6770223	CG43736	FBgn0263993	0	1
	chrX	6768914	6769458	545	Peak_12422	450.536	-1.0362	0.285231	0.000280322	0.0246726	0.691343	0.282657	0.0144502	0.090625	chrX	6745941	6746671	CG14434	FBgn0029915	-22244	1
5	chrX	20041420	20042328	909	Peak_13977	250.17	-1.02107	0.316271	0.00124459	0.0610756	1.46614	0.314371	3.10554e-06	0.0001749	chrX	20042156	20049547	CG9572	FBgn0031089	0	1
	chrX	20041420	20042328	909	Peak_13977	250.17	-1.02107	0.316271	0.00124459	0.0610756	1.46614	0.314371	3.10554e-06	0.0001749	chrX	20035851	20037221	Or19a	FBgn0041626	-4200	1
6	chr3R	17029537	17030200	664	Peak_10212	307.765	-1.00128	0.275287	0.000275616	0.0246726	0.947883	0.271824	0.000488257	0.00807252	chr3R	16966460	17038409	SNF4Agamma	FBgn0264357	0	1
	chr3R	17029537	17030200	664	Peak_10212	307.765	-1.00128	0.275287	0.000275616	0.0246726	0.947883	0.271824	0.000488257	0.00807252	chr3R	17040800	17041948	CG5862	FBgn0038868	10601	1
7	chr2L	20242569	20243072	504	Peak_2266	287.416	-0.996086	0.269786	0.000222385	0.021922	0.648235	0.265159	0.0144971	0.090805	chr2L	20255987	20257192	CG17571	FBgn0259998	12916	1
	chr2L	20242569	20243072	504	Peak_2266	287.416	-0.996086	0.269786	0.000222385	0.021922	0.648235	0.265159	0.0144971	0.090805	chr2L	20263418	20264424	CG17570	FBgn0260000	20347	1
8	chr2L	16612613	16613445	833	Peak_1914	343.701	-0.987678	0.281622	0.000453003	0.0308595	0.850965	0.278599	0.0022548	0.0248626	chr2L	16545015	16662012	CG42389	FBgn0259735	0	1
	chr2L	16612613	16613445	833	Peak_1914	343.701	-0.987678	0.281622	0.000453003	0.0308595	0.850965	0.278599	0.0022548	0.0248626	chr2L	16607369	16610037	CG4631	FBgn0032590	-2577	1
9	chrX	17572272	17573062	791	Peak_13649	289.046	-0.875807	0.236183	0.00020876	0.0213318	0.690725	0.230909	0.00277771	0.028682	chrX	17566490	17592763	chas	FBgn0263258	0	1
	chrX	17572272	17573062	791	Peak_13649	289.046	-0.875807	0.236183	0.00020876	0.0213318	0.690725	0.230909	0.00277771	0.028682	chrX	17563240	17565921	CG12990	FBgn0030859	-6352	1
10	chr2L	4626921	4627999	1079	Peak_561	426.044	-0.875124	0.279506	0.0017423	0.0710201	0.83598	0.277079	0.00255192	0.0270623	chr2L	4641295	4642747	BG642163	FBgn0083938	13297	1
	chr2L	4626921	4627999	1079	Peak_561	426.044	-0.875124	0.279506	0.0017423	0.0710201	0.83598	0.277079	0.00255192	0.0270623	chr2L	4642971	4646562	CG15635	FBgn0031617	14973	1
11	chrX	16419606	16420622	1017	Peak_13494	476.878	-0.855744	0.238816	0.000339316	0.0258466	0.829277	0.235822	0.000437216	0.00744637	chrX	16349059	16421600	para	FBgn0285944	0	1
	chrX	16419606	16420622	1017	Peak_13494	476.878	-0.855744	0.238816	0.000339316	0.0258466	0.829277	0.235822	0.000437216	0.00744637	chrX	16416999	16419448	Cnx14D	FBgn0264077	-159	1
12	chr2R	5816978	5817736	759	Peak_3126	574.102	-0.82252	0.27561	0.00284175	0.0856512	0.68421	0.273585	0.0123876	0.0815608	chr2R	5801000	5817120	Mef2	FBgn0011656	0	1
	chr2R	5816978	5817736	759	Peak_3126	574.102	-0.82252	0.27561	0.00284175	0.0856512	0.68421	0.273585	0.0123876	0.0815608	chr2R	5798397	5800993	Etf-QO	FBgn0286783	-15986	1
13	chrX	3664834	3665588	755	Peak_12062	394.66	-0.815404	0.213994	0.000138738	0.0176399	0.768828	0.209707	0.00024618	0.00483333	chrX	3614039	3681002	Tlk	FBgn0283657	0	2
	chrX	3664834	3665588	755	Peak_12062	394.66	-0.815404	0.213994	0.000138738	0.0176399	0.768828	0.209707	0.00024618	0.00483333	chrX	3671414	3671538	mir-4962	FBgn0263532	5827	2
14	chr3R	17683058	17683940	883	Peak_10327	373.897	-0.781558	0.26752	0.00348356	0.0943299	0.68944	0.264617	0.00917587	0.066518	chr3R	17676415	17681988	glec	FBgn0015229	-1071	1
	chr3R	17683058	17683940	883	Peak_10327	373.897	-0.781558	0.26752	0.00348356	0.0943299	0.68944	0.264617	0.00917587	0.066518	chr3R	17690889	17691960	lsn	FBgn0260940	6950	1
15	chr3R	14275856	14276432	577	Peak_9923	446.804	-0.752892	0.189036	6.811e-05	0.0132719	1.00306	0.185265	6.15655e-08	7.85229e-06	chr3R	14239994	14371308	fru	FBgn0004652	0	1
	chr3R	14275856	14276432	577	Peak_9923	446.804	-0.752892	0.189036	6.811e-05	0.0132719	1.00306	0.185265	6.15655e-08	7.85229e-06	chr3R	14235801	14237353	CG10864	FBgn0038621	-38504	1
16	chr3L	21272907	21273527	621	Peak_7967	250.614	-0.732216	0.237477	0.00204713	0.076814	0.813388	0.232672	0.00047253	0.00788629	chr3L	21263821	21273343	AcCoAS	FBgn0012034	0	1
	chr3L	21272907	21273527	621	Peak_7967	250.614	-0.732216	0.237477	0.00204713	0.076814	0.813388	0.232672	0.00047253	0.00788629	chr3L	21273590	21274606	ppl	FBgn0027945	64	1
17	chr3R	8198307	8199062	756	Peak_9214	397.456	-0.729897	0.254748	0.00416776	0.0989911	0.901388	0.252181	0.000351069	0.00625975	chr3R	8197692	8198426	GstD2	FBgn0010038	0	1
	chr3R	8198307	8199062	756	Peak_9214	397.456	-0.729897	0.254748	0.00416776	0.0989911	0.901388	0.252181	0.000351069	0.00625975	chr3R	8198789	8199535	GstD3	FBgn0010039	0	1
18	chr2R	10368254	10370363	2110	Peak_3782	1638.49	-0.704788	0.147769	1.84647e-06	0.00193395	0.624053	0.145869	1.88434e-05	0.000693671	chr2R	10368691	10384817	PRAS40	FBgn0267824	0	1
	chr2R	10368254	10370363	2110	Peak_3782	1638.49	-0.704788	0.147769	1.84647e-06	0.00193395	0.624053	0.145869	1.88434e-05	0.000693671	chr2R	10384851	10390993	Cpsf160	FBgn0024698	14489	1
19	chr3L	881682	882356	675	Peak_5370	289.61	-0.70239	0.218828	0.00132834	0.0625291	0.60805	0.213129	0.00433125	0.0391661	chr3L	871898	893520	Usp10	FBgn0052479	0	1
	chr3L	881682	882356	675	Peak_5370	289.61	-0.70239	0.218828	0.00132834	0.0625291	0.60805	0.213129	0.00433125	0.0391661	chr3L	877290	881045	CG13907	FBgn0035173	-638	1
20	chrX	3671127	3671698	572	Peak_12065	409.753	-0.701999	0.198595	0.000408047	0.0292316	0.600863	0.193882	0.00194102	0.0224903	chrX	3614039	3681002	Tlk	FBgn0283657	0	2
	chrX	3671127	3671698	572	Peak_12065	409.753	-0.701999	0.198595	0.000408047	0.0292316	0.600863	0.193882	0.00194102	0.0224903	chrX	3671414	3671538	mir-4962	FBgn0263532	0	2
21	chr2R	8903011	8903622	612	Peak_3592	628.272	-0.68966	0.2158	0.00139427	0.0638393	0.628482	0.213074	0.00318187	0.0314758	chr2R	8884005	8895416	Su(z)2	FBgn0265623	-7596	1
	chr2R	8903011	8903622	612	Peak_3592	628.272	-0.68966	0.2158	0.00139427	0.0638393	0.628482	0.213074	0.00318187	0.0314758	chr2R	8881401	8882127	CG33798	FBgn0053798	-20885	1
22	chr3L	11480312	11481132	821	Peak_6685	575.347	-0.645561	0.210477	0.00216121	0.0769812	0.574278	0.207406	0.00562538	0.0471371	chr3L	11480649	11492155	chrb	FBgn0036165	0	1
	chr3L	11480312	11481132	821	Peak_6685	575.347	-0.645561	0.210477	0.00216121	0.0769812	0.574278	0.207406	0.00562538	0.0471371	chr3L	11468057	11468652	Vha16-2	FBgn0028668	-11661	1
23	chrX	18586709	18587561	853	Peak_13786	454.701	-0.628094	0.204814	0.00216463	0.0769812	0.507275	0.200563	0.0114307	0.0774613	chrX	18582570	18587075	Cyp18a1	FBgn0010383	0	1
	chrX	18586709	18587561	853	Peak_13786	454.701	-0.628094	0.204814	0.00216463	0.0769812	0.507275	0.200563	0.0114307	0.0774613	chrX	18601526	18620605	CCKLR-17D1	FBgn0259231	13966	1
24	chr3R	10522299	10523313	1015	Peak_9478	928.109	-0.626127	0.17455	0.000334377	0.0258466	0.517005	0.17187	0.00262867	0.0276069	chr3R	10490628	10523014	Meltrin	FBgn0265140	0	1
	chr3R	10522299	10523313	1015	Peak_9478	928.109	-0.626127	0.17455	0.000334377	0.0258466	0.517005	0.17187	0.00262867	0.0276069	chr3R	10523410	10549983	kibra	FBgn0262127	98	1
25	chr4	1000293	1001106	814	Peak_11545	571.11	-0.623279	0.20969	0.00295492	0.087799	0.588284	0.206644	0.00441544	0.0397558	chr4	995793	996436	sphinx	FBgn0083990	-3858	1
	chr4	1000293	1001106	814	Peak_11545	571.11	-0.623279	0.20969	0.00295492	0.087799	0.588284	0.206644	0.00441544	0.0397558	chr4	1010350	1026914	toy	FBgn0019650	9245	1
26	chr3L	1007617	1008377	761	Peak_5375	296.703	-0.619039	0.208868	0.00303889	0.0887207	0.649077	0.203574	0.00143061	0.0182683	chr3L	995981	1000567	trio	FBgn0024277	-7051	1
	chr3L	1007617	1008377	761	Peak_5375	296.703	-0.619039	0.208868	0.00303889	0.0887207	0.649077	0.203574	0.00143061	0.0182683	chr3L	993982	995703	CG12038	FBgn0035179	-11915	1
27	chr3R	10198484	10199667	1184	Peak_9428	877.143	-0.611769	0.20678	0.0030909	0.0893056	0.599399	0.204721	0.00341285	0.0330439	chr3R	10197396	10197468	snoRNA:Me18S-G1189	FBgn0086058	-1017	1
	chr3R	10198484	10199667	1184	Peak_9428	877.143	-0.611769	0.20678	0.0030909	0.0893056	0.599399	0.204721	0.00341285	0.0330439	chr3R	10155134	10195730	NK7.1	FBgn0024321	-2755	2
28	chr2L	16520114	16521861	1748	Peak_1897	1095.4	-0.509068	0.16044	0.00150903	0.0655137	0.607132	0.158275	0.000125089	0.00298693	chr2L	16508077	16532877	CG5953	FBgn0032587	0	2
	chr2L	16520114	16521861	1748	Peak_1897	1095.4	-0.509068	0.16044	0.00150903	0.0655137	0.607132	0.158275	0.000125089	0.00298693	chr2L	16528374	16528491	mir-4943	FBgn0263555	6514	1

## Sheet: DR peak genes
Peak Attributes							Young Undamaged vs. Young Damaged				Gene Attributes
Rank	Chr.	Start	End	Width	Peak ID	Base Mean	Log2FC in accessibility	Log2FC Standard error	P-value	Adjusted P-value	Chr.	Start	End	Gene ID	FBgn	Distance peak-gene	Total peaks at gene
1	chr3R	19918346	19919176	831	Peak_10588	504.893	-1.30234	0.278672	2.96289e-06	0.00206884	chr3R	19888798	19934682	eIF4EHP	FBgn0053100	0	1
	chr3R	19918346	19919176	831	Peak_10588	504.893	-1.30234	0.278672	2.96289e-06	0.00206884	chr3R	19927321	19931485	Syx1A	FBgn0013343	8146	1
2	chr3L	8029483	8030257	775	Peak_6216	310.852	-1.22154	0.296559	3.80465e-05	0.0090728	chr3L	7972145	8043433	nmo	FBgn0011817	0	1
	chr3L	8029483	8030257	775	Peak_6216	310.852	-1.22154	0.296559	3.80465e-05	0.0090728	chr3L	8047432	8049475	bip1	FBgn0026263	17176	1
3	chrX	18136983	18138248	1266	Peak_13716	987.55	-1.18251	0.250471	2.34513e-06	0.00206884	chrX	18134686	18137317	upd2	FBgn0030904	0	1
	chrX	18136983	18138248	1266	Peak_13716	987.55	-1.18251	0.250471	2.34513e-06	0.00206884	chrX	18152583	18153550	CG15059	FBgn0030905	14336	1
4	chr2R	2569231	2570294	1064	Peak_2697	637.497	-1.14027	0.315556	0.000302061	0.024773	chr2R	2563326	2580095	CG9422	FBgn0033092	0	1
	chr2R	2569231	2570294	1064	Peak_2697	637.497	-1.14027	0.315556	0.000302061	0.024773	chr2R	2570690	2572215	CG15909	FBgn0033090	397	1
5	chr2R	19460551	19461404	854	Peak_4931	391.2	-1.12674	0.260739	1.55099e-05	0.00519829	chr2R	19452413	19487049	apt	FBgn0015903	0	1
	chr2R	19460551	19461404	854	Peak_4931	391.2	-1.12674	0.260739	1.55099e-05	0.00519829	chr2R	19451495	19452303	CG30184	FBgn0050184	-8249	1
6	chr3L	18750108	18750734	627	Peak_7631	332.456	-1.12512	0.333087	0.000730532	0.0422147	chr3L	18743706	18758844	ftz-f1	FBgn0001078	0	3
	chr3L	18750108	18750734	627	Peak_7631	332.456	-1.12512	0.333087	0.000730532	0.0422147	chr3L	18741786	18743583	Atg3	FBgn0036813	-6526	3
7	chr2L	12404285	12404977	693	Peak_1457	433.031	-1.12479	0.2777	5.1132e-05	0.0112746	chr2L	12403269	12404479	vir-1	FBgn0043841	0	1
	chr2L	12404285	12404977	693	Peak_1457	433.031	-1.12479	0.2777	5.1132e-05	0.0112746	chr2L	12398273	12402023	Pkd2	FBgn0041195	-2263	1
8	chrX	9534737	9535581	845	Peak_12747	320.901	-1.11724	0.282166	7.50996e-05	0.0136453	chrX	9520326	9534657	Ptpmeg2	FBgn0028341	-81	2
	chrX	9534737	9535581	845	Peak_12747	320.901	-1.11724	0.282166	7.50996e-05	0.0136453	chrX	9553127	9556936	CG3106	FBgn0030148	17547	2
9	chr3L	2566658	2567756	1099	Peak_5569	744.909	-1.1092	0.280457	7.65398e-05	0.0136453	chr3L	2554846	2586540	msn	FBgn0010909	0	2
	chr3L	2566658	2567756	1099	Peak_5569	744.909	-1.1092	0.280457	7.65398e-05	0.0136453	chr3L	2587455	2588883	RpL8	FBgn0261602	19700	2
10	chrX	4317789	4318509	721	Peak_12130	440.923	-1.07187	0.275297	9.88042e-05	0.016592	chrX	4306888	4378485	bi	FBgn0000179	0	4
	chrX	4317789	4318509	721	Peak_12130	440.923	-1.07187	0.275297	9.88042e-05	0.016592	chrX	4274790	4276499	CG12688	FBgn0029707	-41291	4
11	chrX	6768914	6769458	545	Peak_12422	450.536	-1.0362	0.285231	0.000280322	0.0246726	chrX	6757920	6770223	CG43736	FBgn0263993	0	1
	chrX	6768914	6769458	545	Peak_12422	450.536	-1.0362	0.285231	0.000280322	0.0246726	chrX	6745941	6746671	CG14434	FBgn0029915	-22244	1
12	chrX	20041420	20042328	909	Peak_13977	250.17	-1.02107	0.316271	0.00124459	0.0610756	chrX	20042156	20049547	CG9572	FBgn0031089	0	1
	chrX	20041420	20042328	909	Peak_13977	250.17	-1.02107	0.316271	0.00124459	0.0610756	chrX	20035851	20037221	Or19a	FBgn0041626	-4200	1
13	chr3R	4781014	4781584	571	Peak_8795	429.807	-1.02035	0.281712	0.000292381	0.0246726	chr3R	4775967	4788759	CG11966	FBgn0286204	0	1
	chr3R	4781014	4781584	571	Peak_8795	429.807	-1.02035	0.281712	0.000292381	0.0246726	chr3R	4768675	4770742	CG11964	FBgn0037644	-10273	1
14	chrX	18202975	18203962	988	Peak_13736	1670.14	-1.00406	0.266473	0.000164584	0.019637	chrX	18199386	18203162	upd1	FBgn0004956	0	2
	chrX	18202975	18203962	988	Peak_13736	1670.14	-1.00406	0.266473	0.000164584	0.019637	chrX	18208156	18209934	CG6023	FBgn0030912	4195	2
15	chr3R	17029537	17030200	664	Peak_10212	307.765	-1.00128	0.275287	0.000275616	0.0246726	chr3R	16966460	17038409	SNF4Agamma	FBgn0264357	0	1
	chr3R	17029537	17030200	664	Peak_10212	307.765	-1.00128	0.275287	0.000275616	0.0246726	chr3R	17040800	17041948	CG5862	FBgn0038868	10601	1
16	chr2L	20242569	20243072	504	Peak_2266	287.416	-0.996086	0.269786	0.000222385	0.021922	chr2L	20255987	20257192	CG17571	FBgn0259998	12916	1
	chr2L	20242569	20243072	504	Peak_2266	287.416	-0.996086	0.269786	0.000222385	0.021922	chr2L	20263418	20264424	CG17570	FBgn0260000	20347	1
17	chr2L	16612613	16613445	833	Peak_1914	343.701	-0.987678	0.281622	0.000453003	0.0308595	chr2L	16545015	16662012	CG42389	FBgn0259735	0	1
	chr2L	16612613	16613445	833	Peak_1914	343.701	-0.987678	0.281622	0.000453003	0.0308595	chr2L	16607369	16610037	CG4631	FBgn0032590	-2577	1
18	chr3R	8293470	8293857	388	Peak_9232	341.378	-0.977747	0.269058	0.000279092	0.0246726	chr3R	8291174	8293498	Hsp70Ba	FBgn0013277	0	1
	chr3R	8293470	8293857	388	Peak_9232	341.378	-0.977747	0.269058	0.000279092	0.0246726	chr3R	8288283	8291020	CG5608	FBgn0038058	-2451	1
19	chr2L	17702229	17702929	701	Peak_1984	380.721	-0.974047	0.214553	5.62814e-06	0.0026199	chr2L	17647052	17752346	CadN	FBgn0015609	0	1
	chr2L	17702229	17702929	701	Peak_1984	380.721	-0.974047	0.214553	5.62814e-06	0.0026199	chr2L	17704680	17706142	CG43231	FBgn0262876	1752	1
20	chr2R	20276897	20277416	520	Peak_5070	279.406	-0.962954	0.249628	0.000114522	0.0171354	chr2R	20266152	20277817	mAChR-A	FBgn0000037	0	1
	chr2R	20276897	20277416	520	Peak_5070	279.406	-0.962954	0.249628	0.000114522	0.0171354	chr2R	20279651	20290203	Slik	FBgn0035001	2236	1
21	chrX	12981403	12981905	503	Peak_13097	305.404	-0.95321	0.257902	0.000219014	0.021922	chrX	12973237	12984467	hep	FBgn0010303	0	1
	chrX	12981403	12981905	503	Peak_13097	305.404	-0.95321	0.257902	0.000219014	0.021922	chrX	12985177	12988019	lic	FBgn0261524	3273	1
22	chr3L	7821027	7821628	602	Peak_6184	325.817	-0.943484	0.196916	1.65702e-06	0.00193395	chr3L	7804557	7848648	Pdp1	FBgn0016694	0	1
	chr3L	7821027	7821628	602	Peak_6184	325.817	-0.943484	0.196916	1.65702e-06	0.00193395	chr3L	7770204	7802925	CG32369	FBgn0052369	-18103	1
23	chrX	5454399	5455091	693	Peak_12239	1179.94	-0.937358	0.298425	0.00168361	0.070535	chrX	5422959	5454216	Vsx2	FBgn0263512	-184	1
	chrX	5454399	5455091	693	Peak_12239	1179.94	-0.937358	0.298425	0.00168361	0.070535	chrX	5488287	5506248	Vsx1	FBgn0263511	33197	1
24	chr2L	14418657	14419390	734	Peak_1681	483.242	-0.929222	0.281593	0.000967283	0.0516233	chr2L	14416728	14417331	Pburs	FBgn0264810	-1327	1
	chr2L	14418657	14419390	734	Peak_1681	483.242	-0.929222	0.281593	0.000967283	0.0516233	chr2L	14424314	14425189	Cpr35B	FBgn0028871	4925	1
25	chrX	9539749	9541488	1740	Peak_12748	1017.03	-0.925631	0.244998	0.000158024	0.0195893	chrX	9520326	9534657	Ptpmeg2	FBgn0028341	-5093	2
	chrX	9539749	9541488	1740	Peak_12748	1017.03	-0.925631	0.244998	0.000158024	0.0195893	chrX	9553127	9556936	CG3106	FBgn0030148	11640	2
26	chr2L	3090311	3090852	542	Peak_397	414.862	-0.92198	0.219286	2.61699e-05	0.00756129	chr2L	3068344	3108142	toc	FBgn0015600	0	1
	chr2L	3090311	3090852	542	Peak_397	414.862	-0.92198	0.219286	2.61699e-05	0.00756129	chr2L	3109671	3110998	PpD6	FBgn0005779	18820	1
27	chr3R	10957185	10957893	709	Peak_9517	881.519	-0.92196	0.202886	5.51358e-06	0.0026199	chr3R	10921678	10957648	CG42788	FBgn0261859	0	1
	chr3R	10957185	10957893	709	Peak_9517	881.519	-0.92196	0.202886	5.51358e-06	0.0026199	chr3R	10956475	10956581	mir-2493	FBgn0262315	-605	1
28	chr3L	11003317	11004212	896	Peak_6602	1187.68	-0.919177	0.239752	0.000126143	0.0173456	chr3L	10974270	11002288	klu	FBgn0013469	-1030	2
	chr3L	11003317	11004212	896	Peak_6602	1187.68	-0.919177	0.239752	0.000126143	0.0173456	chr3L	10994508	10994589	snoRNA:Me18S-G962	FBgn0086077	-8729	2
29	chr2R	16801177	16802110	934	Peak_4580	1179	-0.918474	0.219356	2.8249e-05	0.00788994	chr2R	16804257	16824535	Rx	FBgn0020617	2148	1
	chr2R	16801177	16802110	934	Peak_4580	1179	-0.918474	0.219356	2.8249e-05	0.00788994	chr2R	16797208	16798306	CG9235	FBgn0034560	-2872	1
30	chrX	10239842	10240396	555	Peak_12813	254.972	-0.898192	0.284634	0.00160164	0.0677784	chrX	10227684	10241827	CG43740	FBgn0263997	0	1
	chrX	10239842	10240396	555	Peak_12813	254.972	-0.898192	0.284634	0.00160164	0.0677784	chrX	10242202	10242370	snoRNA:U3:9B	FBgn0065046	1807	1
31	chr3R	26352564	26353548	985	Peak_11289	624.817	-0.897956	0.160531	2.22337e-08	6.20987e-05	chr3R	26342780	26352759	jdp	FBgn0027654	0	1
	chr3R	26352564	26353548	985	Peak_11289	624.817	-0.897956	0.160531	2.22337e-08	6.20987e-05	chr3R	26358328	26404627	tmod	FBgn0082582	4781	1
32	chr2L	5403395	5404113	719	Peak_658	1102.86	-0.894106	0.239513	0.000189206	0.0208599	chr2L	5404279	5415928	H15	FBgn0016660	167	2
	chr2L	5403395	5404113	719	Peak_658	1102.86	-0.894106	0.239513	0.000189206	0.0208599	chr2L	5437633	5437749	snoRNA:Me28S-A2486	FBgn0086033	33521	2
33	chr3R	5705347	5706627	1281	Peak_8933	799.763	-0.893656	0.28873	0.00196725	0.0754753	chr3R	5700402	5814598	Glut4EF	FBgn0267336	0	2
	chr3R	5705347	5706627	1281	Peak_8933	799.763	-0.893656	0.28873	0.00196725	0.0754753	chr3R	5651802	5693842	Teh1	FBgn0037766	-11506	1
34	chrX	11027981	11028686	706	Peak_12902	280.888	-0.888523	0.283222	0.00170571	0.0707533	chrX	11023394	11031151	Klp10A	FBgn0030268	0	1
	chrX	11027981	11028686	706	Peak_12902	280.888	-0.888523	0.283222	0.00170571	0.0707533	chrX	11025372	11026445	CG44385	FBgn0265535	-1537	1
35	chrX	19439971	19441103	1133	Peak_13907	840.25	-0.887101	0.219989	5.51911e-05	0.0118576	chrX	19425883	19441515	CG32532	FBgn0052532	0	1
	chrX	19439971	19441103	1133	Peak_13907	840.25	-0.887101	0.219989	5.51911e-05	0.0118576	chrX	19445184	19445274	mir-972	FBgn0262181	4082	1
36	chr3R	1638855	1639939	1085	Peak_8422	726.696	-0.883492	0.303293	0.00357973	0.0950924	chr3R	1639330	1644542	CG42675	FBgn0261561	0	1
	chr3R	1638855	1639939	1085	Peak_8422	726.696	-0.883492	0.303293	0.00357973	0.0950924	chr3R	1628049	1634499	CG11000	FBgn0263353	-4357	1
37	chr3R	8889572	8890465	894	Peak_9268	1465.13	-0.880383	0.274253	0.00132681	0.0625291	chr3R	8883476	8903846	sim	FBgn0004666	0	1
	chr3R	8889572	8890465	894	Peak_9268	1465.13	-0.880383	0.274253	0.00132681	0.0625291	chr3R	8877966	8882447	pic	FBgn0260962	-7126	1
38	chr3R	21009960	21010921	962	Peak_10719	993.975	-0.878763	0.191554	4.48496e-06	0.00234872	chr3R	20995286	21019498	lobo	FBgn0083946	0	1
	chr3R	21009960	21010921	962	Peak_10719	993.975	-0.878763	0.191554	4.48496e-06	0.00234872	chr3R	21010104	21018528	dan	FBgn0039286	0	1
39	chrX	17572272	17573062	791	Peak_13649	289.046	-0.875807	0.236183	0.00020876	0.0213318	chrX	17566490	17592763	chas	FBgn0263258	0	1
	chrX	17572272	17573062	791	Peak_13649	289.046	-0.875807	0.236183	0.00020876	0.0213318	chrX	17563240	17565921	CG12990	FBgn0030859	-6352	1
40	chr2L	18795839	18796832	994	Peak_2089	1100.84	-0.875218	0.231971	0.000161315	0.0195893	chr2L	18804490	18805347	CG43814	FBgn0264362	7659	1
	chr2L	18795839	18796832	994	Peak_2089	1100.84	-0.875218	0.231971	0.000161315	0.0195893	chr2L	18808693	18810986	CG42502	FBgn0260228	11862	1
41	chr2L	4626921	4627999	1079	Peak_561	426.044	-0.875124	0.279506	0.0017423	0.0710201	chr2L	4641295	4642747	BG642163	FBgn0083938	13297	1
	chr2L	4626921	4627999	1079	Peak_561	426.044	-0.875124	0.279506	0.0017423	0.0710201	chr2L	4642971	4646562	CG15635	FBgn0031617	14973	1
42	chr3R	7905509	7905991	483	Peak_9186	260.319	-0.8742	0.288089	0.00240957	0.0801182	chr3R	7894096	7916334	ATP8B	FBgn0037989	0	1
	chr3R	7905509	7905991	483	Peak_9186	260.319	-0.8742	0.288089	0.00240957	0.0801182	chr3R	7920597	7937142	dpr17	FBgn0051361	14607	1
43	chr3L	18764182	18765278	1097	Peak_7638	999.719	-0.870413	0.226074	0.000118059	0.0173456	chr3L	18743706	18758844	ftz-f1	FBgn0001078	-5339	3
	chr3L	18764182	18765278	1097	Peak_7638	999.719	-0.870413	0.226074	0.000118059	0.0173456	chr3L	18741786	18743583	Atg3	FBgn0036813	-20600	3
44	chr2L	11445410	11446590	1181	Peak_1396	2180.05	-0.867214	0.224732	0.000113908	0.0171354	chr2L	11434310	11445614	salm	FBgn0261648	0	1
	chr2L	11445410	11446590	1181	Peak_1396	2180.05	-0.867214	0.224732	0.000113908	0.0171354	chr2L	11484706	11486949	CG43355	FBgn0263087	38117	1
45	chrX	19243084	19243614	531	Peak_13881	364.136	-0.865266	0.258383	0.000811712	0.0453422	chrX	19221107	19242480	nAChRalpha7	FBgn0086778	-605	2
	chrX	19243084	19243614	531	Peak_13881	364.136	-0.865266	0.258383	0.000811712	0.0453422	chrX	19247213	19364074	kek5	FBgn0031016	3600	2
46	chr3R	12655675	12656175	501	Peak_9764	501.51	-0.859953	0.243839	0.000420742	0.0293448	chr3R	12632935	12655771	abd-A	FBgn0000014	0	1
	chr3R	12655675	12656175	501	Peak_9764	501.51	-0.859953	0.243839	0.000420742	0.0293448	chr3R	12656837	12717685	iab-8	FBgn0262290	663	2
47	chr3R	10172448	10173117	670	Peak_9421	609.136	-0.857918	0.224833	0.000135743	0.0176399	chr3R	10155134	10195730	NK7.1	FBgn0024321	0	2
	chr3R	10172448	10173117	670	Peak_9421	609.136	-0.857918	0.224833	0.000135743	0.0176399	chr3R	10184077	10187508	HEATR2	FBgn0051320	10961	1
48	chrX	16419606	16420622	1017	Peak_13494	476.878	-0.855744	0.238816	0.000339316	0.0258466	chrX	16349059	16421600	para	FBgn0285944	0	1
	chrX	16419606	16420622	1017	Peak_13494	476.878	-0.855744	0.238816	0.000339316	0.0258466	chrX	16416999	16419448	Cnx14D	FBgn0264077	-159	1
49	chr3R	9843260	9843857	598	Peak_9386	404.132	-0.85333	0.206531	3.60042e-05	0.00887292	chr3R	9854949	9857205	Cyp6d5	FBgn0038194	11093	1
	chr3R	9843260	9843857	598	Peak_9386	404.132	-0.85333	0.206531	3.60042e-05	0.00887292	chr3R	9858092	9860763	CG3061	FBgn0038195	14236	1
50	chr3L	11421415	11421886	472	Peak_6679	325.185	-0.8387	0.246739	0.000675998	0.0396914	chr3L	11418257	11419495	CG7560	FBgn0036157	-1921	1
	chr3L	11421415	11421886	472	Peak_6679	325.185	-0.8387	0.246739	0.000675998	0.0396914	chr3L	11427794	11428576	CG6149	FBgn0036158	5909	1
51	chr2L	1642992	1643992	1001	Peak_231	952.503	-0.827853	0.183976	6.80233e-06	0.00299983	chr2L	1651257	1704682	chinmo	FBgn0086758	7266	1
	chr2L	1642992	1643992	1001	Peak_231	952.503	-0.827853	0.183976	6.80233e-06	0.00299983	chr2L	1612428	1614160	RFeSP	FBgn0021906	-28833	1
52	chr3R	12589328	12590185	858	Peak_9759	1536.52	-0.82738	0.23473	0.000423765	0.0293448	chr3R	12567846	12598911	bxd	FBgn0020556	0	2
	chr3R	12589328	12590185	858	Peak_9759	1536.52	-0.82738	0.23473	0.000423765	0.0293448	chr3R	12576462	12577056	CG31275	FBgn0063261	-12273	1
53	chr2R	5816978	5817736	759	Peak_3126	574.102	-0.82252	0.27561	0.00284175	0.0856512	chr2R	5801000	5817120	Mef2	FBgn0011656	0	1
	chr2R	5816978	5817736	759	Peak_3126	574.102	-0.82252	0.27561	0.00284175	0.0856512	chr2R	5798397	5800993	Etf-QO	FBgn0286783	-15986	1
54	chrX	1718246	1719191	946	Peak_11768	901.111	-0.820038	0.267843	0.00220129	0.0769812	chrX	1667751	1746966	prage	FBgn0283741	0	1
	chrX	1718246	1719191	946	Peak_11768	901.111	-0.820038	0.267843	0.00220129	0.0769812	chrX	1715501	1716414	CG14811	FBgn0029590	-1833	1
55	chr2R	2932362	2933974	1613	Peak_2732	859.055	-0.817898	0.265133	0.00203647	0.076814	chr2R	2933273	2936043	Tsp42El	FBgn0033134	0	1
	chr2R	2932362	2933974	1613	Peak_2732	859.055	-0.817898	0.265133	0.00203647	0.076814	chr2R	2930160	2932215	Tsp42Ek	FBgn0033133	-148	1
56	chrX	3664834	3665588	755	Peak_12062	394.66	-0.815404	0.213994	0.000138738	0.0176399	chrX	3614039	3681002	Tlk	FBgn0283657	0	2
	chrX	3664834	3665588	755	Peak_12062	394.66	-0.815404	0.213994	0.000138738	0.0176399	chrX	3671414	3671538	mir-4962	FBgn0263532	5827	2
57	chr3L	14124347	14125167	821	Peak_7005	963.903	-0.815044	0.195817	3.15086e-05	0.00800031	chr3L	14105504	14124397	Sox21b	FBgn0042630	0	1
	chr3L	14124347	14125167	821	Peak_7005	963.903	-0.815044	0.195817	3.15086e-05	0.00800031	chr3L	14096580	14101218	Sox21a	FBgn0036411	-23130	1
58	chr2L	12617625	12618939	1315	Peak_1496	1752	-0.814003	0.221712	0.000241183	0.0229644	chr2L	12587624	12628135	nub	FBgn0085424	0	1
	chr2L	12617625	12618939	1315	Peak_1496	1752	-0.814003	0.221712	0.000241183	0.0229644	chr2L	12610516	12646356	Ref2	FBgn0032439	0	1
59	chr2R	8929449	8930072	624	Peak_3599	706.626	-0.813421	0.223456	0.000272445	0.0246726	chr2R	8932199	8934761	CG13323	FBgn0033788	2128	1
	chr2R	8929449	8930072	624	Peak_3599	706.626	-0.813421	0.223456	0.000272445	0.0246726	chr2R	8936650	8937161	CG13324	FBgn0033789	6579	1
60	chr3L	20614569	20615490	922	Peak_7869	2250.62	-0.809354	0.215415	0.000171837	0.0199364	chr3L	20590240	20613759	knrl	FBgn0001323	-811	1
	chr3L	20614569	20615490	922	Peak_7869	2250.62	-0.809354	0.215415	0.000171837	0.0199364	chr3L	20630298	20634010	CG13251	FBgn0037014	14809	1
61	chrX	7498409	7499117	709	Peak_12498	1192.61	-0.808894	0.249494	0.00118637	0.060269	chrX	7503180	7572292	ct	FBgn0004198	4064	4
	chrX	7498409	7499117	709	Peak_12498	1192.61	-0.808894	0.249494	0.00118637	0.060269	chrX	7479335	7480164	CG12689	FBgn0029952	-18246	3
62	chr2L	8424699	8425349	651	Peak_1042	304.311	-0.808568	0.270103	0.00275746	0.0843239	chr2L	8415689	8430977	Akap200	FBgn0027932	0	1
	chr2L	8424699	8425349	651	Peak_1042	304.311	-0.808568	0.270103	0.00275746	0.0843239	chr2L	8431085	8433598	grk	FBgn0001137	5737	1
63	chrX	589845	590424	580	Peak_11631	299.108	-0.806084	0.277117	0.00362798	0.0955937	chrX	580866	643529	sdk	FBgn0021764	0	1
	chrX	589845	590424	580	Peak_11631	299.108	-0.806084	0.277117	0.00362798	0.0955937	chrX	550146	551932	SkpA	FBgn0025637	-37914	1
64	chrX	8107698	8108678	981	Peak_12577	1408.96	-0.80255	0.22238	0.000307482	0.024773	chrX	8072581	8133460	sdt	FBgn0261873	0	1
	chrX	8107698	8108678	981	Peak_12577	1408.96	-0.80255	0.22238	0.000307482	0.024773	chrX	8134716	8135516	CG2147	FBgn0030025	26039	1
65	chr2L	3538497	3540391	1895	Peak_436	2175.01	-0.800107	0.18735	1.94901e-05	0.00583241	chr2L	3539246	3548423	drm	FBgn0024244	0	1
	chr2L	3538497	3540391	1895	Peak_436	2175.01	-0.800107	0.18735	1.94901e-05	0.00583241	chr2L	3530788	3532678	IFT57	FBgn0031550	-5820	1
66	chr3L	377158	378607	1450	Peak_5247	2310.82	-0.799639	0.250085	0.00138642	0.0638393	chr3L	366523	392633	trh	FBgn0262139	0	1
	chr3L	377158	378607	1450	Peak_5247	2310.82	-0.799639	0.250085	0.00138642	0.0638393	chr3L	365663	366437	CG13884	FBgn0035138	-10722	1
67	chr3L	20096923	20097678	756	Peak_7799	554.972	-0.795845	0.223896	0.000378655	0.0283282	chr3L	20091183	20096927	CG14186	FBgn0036935	0	1
	chr3L	20096923	20097678	756	Peak_7799	554.972	-0.795845	0.223896	0.000378655	0.0283282	chr3L	20099193	20100657	CG14185	FBgn0036936	1516	1
68	chr2R	15156251	15156789	539	Peak_4391	496.153	-0.786878	0.224678	0.000461348	0.0309233	chr2R	15157582	15168901	rib	FBgn0003254	794	1
	chr2R	15156251	15156789	539	Peak_4391	496.153	-0.786878	0.224678	0.000461348	0.0309233	chr2R	15147413	15149799	tbrd-2	FBgn0034423	-6453	1
69	chr3R	17683058	17683940	883	Peak_10327	373.897	-0.781558	0.26752	0.00348356	0.0943299	chr3R	17676415	17681988	glec	FBgn0015229	-1071	1
	chr3R	17683058	17683940	883	Peak_10327	373.897	-0.781558	0.26752	0.00348356	0.0943299	chr3R	17690889	17691960	lsn	FBgn0260940	6950	1
70	chr2R	7487322	7488115	794	Peak_3380	488.644	-0.780592	0.246487	0.00154091	0.0662312	chr2R	7464989	7480631	tou	FBgn0033636	-6692	1
	chr2R	7487322	7488115	794	Peak_3380	488.644	-0.780592	0.246487	0.00154091	0.0662312	chr2R	7478845	7478990	snoRNA:Psi28S-1180	FBgn0086658	-8333	1
71	chrX	4305264	4305928	665	Peak_12127	1214.07	-0.777262	0.221118	0.000439516	0.0301861	chrX	4306888	4378485	bi	FBgn0000179	961	4
	chrX	4305264	4305928	665	Peak_12127	1214.07	-0.777262	0.221118	0.000439516	0.0301861	chrX	4274790	4276499	CG12688	FBgn0029707	-28766	4
72	chrX	8700496	8701112	617	Peak_12644	726.782	-0.775498	0.226587	0.000620438	0.0379464	chrX	8650571	8679386	Lim1	FBgn0026411	-21111	1
	chrX	8700496	8701112	617	Peak_12644	726.782	-0.775498	0.226587	0.000620438	0.0379464	chrX	8732355	8766807	CG12075	FBgn0030065	31244	1
73	chrX	16041506	16042522	1017	Peak_13446	1202.57	-0.773915	0.21578	0.000335025	0.0258466	chrX	16012099	16043010	disco-r	FBgn0285879	0	2
	chrX	16041506	16042522	1017	Peak_13446	1202.57	-0.773915	0.21578	0.000335025	0.0258466	chrX	15987091	15998979	CG42354	FBgn0259700	-42528	1
74	chr3L	18751895	18752795	901	Peak_7632	1454.55	-0.773612	0.208199	0.000202609	0.0211829	chr3L	18743706	18758844	ftz-f1	FBgn0001078	0	3
	chr3L	18751895	18752795	901	Peak_7632	1454.55	-0.773612	0.208199	0.000202609	0.0211829	chr3L	18741786	18743583	Atg3	FBgn0036813	-8313	3
75	chr2R	5842169	5843174	1006	Peak_3132	1104.95	-0.772144	0.245003	0.00162397	0.0683782	chr2R	5846623	5847237	CG15863	FBgn0033467	3450	1
	chr2R	5842169	5843174	1006	Peak_3132	1104.95	-0.772144	0.245003	0.00162397	0.0683782	chr2R	5847053	5851358	Pal1	FBgn0283510	3880	1
76	chr3R	12672883	12673381	499	Peak_9765	500.062	-0.77079	0.260458	0.00308272	0.0893056	chr3R	12656837	12717685	iab-8	FBgn0262290	0	2
	chr3R	12672883	12673381	499	Peak_9765	500.062	-0.77079	0.260458	0.00308272	0.0893056	chr3R	12675725	12682218	iab-4	FBgn0251118	2345	1
77	chr2L	21618625	21619307	683	Peak_2415	286.454	-0.770219	0.237351	0.00117424	0.060269	chr2L	21614231	21618774	CG2201	FBgn0032955	0	1
	chr2L	21618625	21619307	683	Peak_2415	286.454	-0.770219	0.237351	0.00117424	0.060269	chr2L	21626308	21629932	Df31	FBgn0022893	7002	1
78	chr2R	5276898	5277814	917	Peak_3060	385.704	-0.767321	0.173653	9.92979e-06	0.00361747	chr2R	5277669	5282786	l(2)03659	FBgn0010549	0	1
	chr2R	5276898	5277814	917	Peak_3060	385.704	-0.767321	0.173653	9.92979e-06	0.00361747	chr2R	5196800	5275759	CG13954	FBgn0033405	-1140	1
79	chr3R	4484397	4484906	510	Peak_8742	294.83	-0.765324	0.224236	0.000642453	0.0384543	chr3R	4480696	4486483	bel	FBgn0263231	0	1
	chr3R	4484397	4484906	510	Peak_8742	294.83	-0.765324	0.224236	0.000642453	0.0384543	chr3R	4486624	4491054	p	FBgn0086679	1719	1
80	chrX	9623034	9623748	715	Peak_12759	956.724	-0.762581	0.24637	0.00196638	0.0754753	chrX	9623680	9649831	Sp1	FBgn0020378	0	1
	chrX	9623034	9623748	715	Peak_12759	956.724	-0.762581	0.24637	0.00196638	0.0754753	chrX	9588218	9591591	btd	FBgn0000233	-31444	1
81	chr2L	9567432	9567960	529	Peak_1158	436.383	-0.761816	0.239861	0.00149282	0.0655137	chr2L	9547719	9566750	jp	FBgn0032129	-683	1
	chr2L	9567432	9567960	529	Peak_1158	436.383	-0.761816	0.239861	0.00149282	0.0655137	chr2L	9568889	9573572	CG3838	FBgn0032130	930	1
82	chr3L	14699481	14700079	599	Peak_7096	768.904	-0.754535	0.245827	0.00214507	0.0769812	chr3L	14665938	14740968	ome	FBgn0259175	0	1
	chr3L	14699481	14700079	599	Peak_7096	768.904	-0.754535	0.245827	0.00214507	0.0769812	chr3L	14698563	14699257	CG13476	FBgn0036441	-225	1
83	chr3R	6439815	6440894	1080	Peak_9034	2618.55	-0.754186	0.246696	0.00223454	0.0769812	chr3R	6333282	6439998	hth	FBgn0001235	0	2
	chr3R	6439815	6440894	1080	Peak_9034	2618.55	-0.754186	0.246696	0.00223454	0.0769812	chr3R	6501281	6502973	CG6465	FBgn0037818	60388	2
84	chrX	4940293	4941595	1303	Peak_12210	2121.94	-0.753394	0.202273	0.000195594	0.0210113	chrX	4942305	4964962	ovo	FBgn0003028	711	1
	chrX	4940293	4941595	1303	Peak_12210	2121.94	-0.753394	0.202273	0.000195594	0.0210113	chrX	4965059	4977058	CG32767	FBgn0052767	23465	2
85	chr3R	14275856	14276432	577	Peak_9923	446.804	-0.752892	0.189036	6.811e-05	0.0132719	chr3R	14239994	14371308	fru	FBgn0004652	0	1
	chr3R	14275856	14276432	577	Peak_9923	446.804	-0.752892	0.189036	6.811e-05	0.0132719	chr3R	14235801	14237353	CG10864	FBgn0038621	-38504	1
86	chr2R	1578553	1579866	1314	Peak_2554	1542.76	-0.746325	0.244433	0.00226351	0.077412	chr2R	1564254	1578711	scaf	FBgn0033033	0	1
	chr2R	1578553	1579866	1314	Peak_2554	1542.76	-0.746325	0.244433	0.00226351	0.077412	chr2R	1585376	1587717	CG17337	FBgn0259979	5511	1
87	chrX	4089248	4089831	584	Peak_12109	264.537	-0.745898	0.246306	0.00245901	0.080578	chrX	4026919	4100126	Fas2	FBgn0000635	0	1
	chrX	4089248	4089831	584	Peak_12109	264.537	-0.745898	0.246306	0.00245901	0.080578	chrX	4107057	4107454	CG43288	FBgn0262980	17227	1
88	chr2L	20120813	20121429	617	Peak_2260	447.147	-0.743751	0.257872	0.00392422	0.0978603	chr2L	20133754	20134923	CG10651	FBgn0032853	12326	1
	chr2L	20120813	20121429	617	Peak_2260	447.147	-0.743751	0.257872	0.00392422	0.0978603	chr2L	20103385	20104150	CG13970	FBgn0032851	-16664	1
89	chr2L	3579743	3581268	1526	Peak_449	1606.8	-0.743707	0.259343	0.00413528	0.0989911	chr2L	3578012	3580769	sob	FBgn0004892	0	1
	chr2L	3579743	3581268	1526	Peak_449	1606.8	-0.743707	0.259343	0.00413528	0.0989911	chr2L	3576209	3576623	CG43815	FBgn0264363	-3121	1
90	chrX	13884390	13885255	866	Peak_13229	784.746	-0.738715	0.236191	0.00176231	0.0710201	chrX	13740148	13880475	mamo	FBgn0267033	-3916	1
	chrX	13884390	13885255	866	Peak_13229	784.746	-0.738715	0.236191	0.00176231	0.0710201	chrX	13890377	13893838	ben	FBgn0000173	5123	1
91	chr3L	18022571	18023072	502	Peak_7552	399.384	-0.737301	0.219434	0.000779374	0.0446541	chr3L	17944052	18057796	Eip75B	FBgn0000568	0	2
	chr3L	18022571	18023072	502	Peak_7552	399.384	-0.737301	0.219434	0.000779374	0.0446541	chr3L	18033416	18034838	CG32192	FBgn0052192	10345	1
92	chr3L	13221412	13222187	776	Peak_6928	1172.86	-0.735232	0.203926	0.000311686	0.0248725	chr3L	13221791	13272742	caps	FBgn0023095	0	1
	chr3L	13221412	13222187	776	Peak_6928	1172.86	-0.735232	0.203926	0.000311686	0.0248725	chr3L	13239963	13241802	CG32119	FBgn0052119	17777	1
93	chrX	4320578	4321356	779	Peak_12132	1864	-0.734445	0.212039	0.000532758	0.033818	chrX	4306888	4378485	bi	FBgn0000179	0	4
	chrX	4320578	4321356	779	Peak_12132	1864	-0.734445	0.212039	0.000532758	0.033818	chrX	4274790	4276499	CG12688	FBgn0029707	-44080	4
94	chr2R	13709495	13710358	864	Peak_4186	1081.56	-0.733827	0.202707	0.000294458	0.0246726	chr2R	13688636	13729118	grh	FBgn0259211	0	1
	chr2R	13709495	13710358	864	Peak_4186	1081.56	-0.733827	0.202707	0.000294458	0.0246726	chr2R	13730946	13748087	olf186-F	FBgn0041585	20589	1
95	chr3L	21272907	21273527	621	Peak_7967	250.614	-0.732216	0.237477	0.00204713	0.076814	chr3L	21263821	21273343	AcCoAS	FBgn0012034	0	1
	chr3L	21272907	21273527	621	Peak_7967	250.614	-0.732216	0.237477	0.00204713	0.076814	chr3L	21273590	21274606	ppl	FBgn0027945	64	1
96	chr3R	8198307	8199062	756	Peak_9214	397.456	-0.729897	0.254748	0.00416776	0.0989911	chr3R	8197692	8198426	GstD2	FBgn0010038	0	1
	chr3R	8198307	8199062	756	Peak_9214	397.456	-0.729897	0.254748	0.00416776	0.0989911	chr3R	8198789	8199535	GstD3	FBgn0010039	0	1
97	chr2R	6505682	6506283	602	Peak_3237	462.075	-0.727138	0.190225	0.000132097	0.0175689	chr2R	6505166	6529312	CG11883	FBgn0033538	0	1
	chr2R	6505682	6506283	602	Peak_3237	462.075	-0.727138	0.190225	0.000132097	0.0175689	chr2R	6445392	6504785	psq	FBgn0263102	-898	2
98	chr2R	9844793	9845921	1129	Peak_3695	1195.38	-0.72696	0.188285	0.000112946	0.0171354	chr2R	9830891	9845594	AGO1	FBgn0262739	0	1
	chr2R	9844793	9845921	1129	Peak_3695	1195.38	-0.72696	0.188285	0.000112946	0.0171354	chr2R	9846049	9847713	Rpn13	FBgn0033886	129	1
99	chr3L	17599800	17600373	574	Peak_7484	354.369	-0.725624	0.219767	0.000960691	0.0516002	chr3L	17613222	17614725	Vps60	FBgn0036740	12850	1
	chr3L	17599800	17600373	574	Peak_7484	354.369	-0.725624	0.219767	0.000960691	0.0516002	chr3L	17614923	17624071	CG7510	FBgn0036741	14551	1
100	chrX	8544478	8545613	1136	Peak_12622	2118.45	-0.723252	0.228911	0.00158018	0.0672099	chrX	8524191	8544714	oc	FBgn0004102	0	1
	chrX	8544478	8545613	1136	Peak_12622	2118.45	-0.723252	0.228911	0.00158018	0.0672099	chrX	8571095	8574735	CG12772	FBgn0030055	25483	1
101	chr3R	5046044	5046497	454	Peak_8831	299.055	-0.722053	0.251702	0.00412185	0.0989598	chr3R	5063804	5065989	D1	FBgn0000412	17308	1
	chr3R	5046044	5046497	454	Peak_8831	299.055	-0.722053	0.251702	0.00412185	0.0989598	chr3R	5066478	5071591	Vps15	FBgn0260935	19982	1
102	chrX	16042947	16043515	569	Peak_13447	722.965	-0.721819	0.230358	0.00172751	0.0710201	chrX	16012099	16043010	disco-r	FBgn0285879	0	2
	chrX	16042947	16043515	569	Peak_13447	722.965	-0.721819	0.230358	0.00172751	0.0710201	chrX	16085286	16085372	mir-985	FBgn0262283	41772	1
103	chr3R	10108990	10110202	1213	Peak_9411	974.525	-0.719465	0.203141	0.000397545	0.0292316	chr3R	10089080	10112625	trx	FBgn0003862	0	2
	chr3R	10108990	10110202	1213	Peak_9411	974.525	-0.719465	0.203141	0.000397545	0.0292316	chr3R	10114792	10127998	red	FBgn0285913	4591	2
104	chr2L	14094621	14095016	396	Peak_1642	253.005	-0.716098	0.244621	0.00341832	0.0943299	chr2L	14040169	14092725	nAChRalpha5	FBgn0028875	-1897	1
	chr2L	14094621	14095016	396	Peak_1642	253.005	-0.716098	0.244621	0.00341832	0.0943299	chr2L	14104089	14160587	CG46301	FBgn0283651	9074	1
105	chr3R	9638295	9638990	696	Peak_9342	841.553	-0.712681	0.240354	0.00302561	0.0887207	chr3R	9638830	9640370	tal-3A	FBgn0259732	0	1
	chr3R	9638295	9638990	696	Peak_9342	841.553	-0.712681	0.240354	0.00302561	0.0887207	chr3R	9652872	9653408	Mst87F	FBgn0002862	13883	1
106	chr2R	20701100	20701646	547	Peak_5121	558.469	-0.709657	0.239784	0.00308068	0.0893056	chr2R	20702344	20722125	Dll	FBgn0000157	699	1
	chr2R	20701100	20701646	547	Peak_5121	558.469	-0.709657	0.239784	0.00308068	0.0893056	chr2R	20696847	20697630	CG42851	FBgn0262098	-3471	1
107	chr2R	10368254	10370363	2110	Peak_3782	1638.49	-0.704788	0.147769	1.84647e-06	0.00193395	chr2R	10368691	10384817	PRAS40	FBgn0267824	0	1
	chr2R	10368254	10370363	2110	Peak_3782	1638.49	-0.704788	0.147769	1.84647e-06	0.00193395	chr2R	10384851	10390993	Cpsf160	FBgn0024698	14489	1
108	chr2R	7524755	7525448	694	Peak_3393	476.34	-0.704499	0.218712	0.0012769	0.0616115	chr2R	7528981	7533734	CG9003	FBgn0033639	3534	1
	chr2R	7524755	7525448	694	Peak_3393	476.34	-0.704499	0.218712	0.0012769	0.0616115	chr2R	7506983	7520020	CG9005	FBgn0033638	-4736	2
109	chr2L	3825353	3825768	416	Peak_486	325.997	-0.70388	0.24324	0.00380647	0.0975301	chr2L	3825674	3827099	slp1	FBgn0003430	0	1
	chr2L	3825353	3825768	416	Peak_486	325.997	-0.70388	0.24324	0.00380647	0.0975301	chr2L	3836839	3839185	slp2	FBgn0004567	11072	1
110	chr3L	881682	882356	675	Peak_5370	289.61	-0.70239	0.218828	0.00132834	0.0625291	chr3L	871898	893520	Usp10	FBgn0052479	0	1
	chr3L	881682	882356	675	Peak_5370	289.61	-0.70239	0.218828	0.00132834	0.0625291	chr3L	877290	881045	CG13907	FBgn0035173	-638	1
111	chrX	3671127	3671698	572	Peak_12065	409.753	-0.701999	0.198595	0.000408047	0.0292316	chrX	3614039	3681002	Tlk	FBgn0283657	0	2
	chrX	3671127	3671698	572	Peak_12065	409.753	-0.701999	0.198595	0.000408047	0.0292316	chrX	3671414	3671538	mir-4962	FBgn0263532	0	2
112	chr3R	12145832	12146524	693	Peak_9694	525.769	-0.697336	0.238835	0.00350325	0.0943299	chr3R	12136263	12164265	Sulf1	FBgn0040271	0	1
	chr3R	12145832	12146524	693	Peak_9694	525.769	-0.697336	0.238835	0.00350325	0.0943299	chr3R	12147559	12147911	CG44044	FBgn0264836	1036	1
113	chr3L	10668821	10669294	474	Peak_6518	282.65	-0.694667	0.236955	0.00337175	0.0943299	chr3L	10657838	10683834	simj	FBgn0010762	0	1
	chr3L	10668821	10669294	474	Peak_6518	282.65	-0.694667	0.236955	0.00337175	0.0943299	chr3L	10656475	10657535	Adi1	FBgn0052068	-11287	1
114	chr4	527373	529487	2115	Peak_11509	3540.42	-0.69416	0.191377	0.000286529	0.0246726	chr4	522435	560418	zfh2	FBgn0004607	0	1
	chr4	527373	529487	2115	Peak_11509	3540.42	-0.69416	0.191377	0.000286529	0.0246726	chr4	490034	506659	Asator	FBgn0039908	-20715	1
115	chr2R	16771896	16772441	546	Peak_4577	609.547	-0.693622	0.226431	0.00218926	0.0769812	chr2R	16771129	16790919	otp	FBgn0015524	0	1
	chr2R	16771896	16772441	546	Peak_4577	609.547	-0.693622	0.226431	0.00218926	0.0769812	chr2R	16767434	16770168	Cib2	FBgn0034558	-1729	1
116	chr2R	17500213	17500877	665	Peak_4684	358.909	-0.693268	0.173491	6.44263e-05	0.012853	chr2R	17495897	17500576	CG15673	FBgn0034639	0	1
	chr2R	17500213	17500877	665	Peak_4684	358.909	-0.693268	0.173491	6.44263e-05	0.012853	chr2R	17501349	17504412	CG18870	FBgn0042180	473	1
117	chr2R	8903011	8903622	612	Peak_3592	628.272	-0.68966	0.2158	0.00139427	0.0638393	chr2R	8884005	8895416	Su(z)2	FBgn0265623	-7596	1
	chr2R	8903011	8903622	612	Peak_3592	628.272	-0.68966	0.2158	0.00139427	0.0638393	chr2R	8881401	8882127	CG33798	FBgn0053798	-20885	1
118	chr3L	14170511	14171398	888	Peak_7011	1395.62	-0.685442	0.237231	0.00386055	0.0975301	chr3L	14179348	14182748	nan	FBgn0036414	7951	1
	chr3L	14170511	14171398	888	Peak_7011	1395.62	-0.685442	0.237231	0.00386055	0.0975301	chr3L	14183969	14226350	nuf	FBgn0013718	12572	1
119	chr2L	12854433	12854932	500	Peak_1523	370.584	-0.685262	0.195895	0.000468568	0.0309233	chr2L	12816999	12822787	kek1	FBgn0015399	-31647	1
	chr2L	12854433	12854932	500	Peak_1523	370.584	-0.685262	0.195895	0.000468568	0.0309233	chr2L	12912529	12916774	ACXC	FBgn0040508	57598	1
120	chr3L	5177221	5178523	1303	Peak_5904	1323.51	-0.683974	0.190824	0.00033796	0.0258466	chr3L	5148920	5177897	shep	FBgn0052423	0	1
	chr3L	5177221	5178523	1303	Peak_5904	1323.51	-0.683974	0.190824	0.00033796	0.0258466	chr3L	5145777	5147877	Srp54k	FBgn0010747	-29345	1
121	chr3L	8442788	8443567	780	Peak_6272	534.51	-0.682057	0.192958	0.000408175	0.0292316	chr3L	8443021	8465769	Gug	FBgn0010825	0	1
	chr3L	8442788	8443567	780	Peak_6272	534.51	-0.682057	0.192958	0.000408175	0.0292316	chr3L	8436141	8442477	CG6983	FBgn0035896	-312	1
122	chrX	17662019	17662669	651	Peak_13671	1064.12	-0.681181	0.227898	0.0027992	0.085289	chrX	17662601	17672612	unc-4	FBgn0024184	0	1
	chrX	17662019	17662669	651	Peak_13671	1064.12	-0.681181	0.227898	0.0027992	0.085289	chrX	17604176	17645718	CG42684	FBgn0261570	-16302	1
123	chr2R	1976466	1977057	592	Peak_2598	386.427	-0.679828	0.221218	0.00211834	0.0769812	chr2R	1975377	2019346	EcR	FBgn0000546	0	2
	chr2R	1976466	1977057	592	Peak_2598	386.427	-0.679828	0.221218	0.00211834	0.0769812	chr2R	1968332	1973130	Ars2	FBgn0033062	-3337	1
124	chr3R	10111768	10112818	1051	Peak_9412	954.409	-0.675113	0.201011	0.000783405	0.0446541	chr3R	10089080	10112625	trx	FBgn0003862	0	2
	chr3R	10111768	10112818	1051	Peak_9412	954.409	-0.675113	0.201011	0.000783405	0.0446541	chr3R	10114792	10127998	red	FBgn0285913	1975	2
125	chr3R	22286899	22288238	1340	Peak_10855	670.433	-0.674736	0.161891	3.07513e-05	0.00800031	chr3R	22287248	22295730	CG5455	FBgn0039430	0	1
	chr3R	22286899	22288238	1340	Peak_10855	670.433	-0.674736	0.161891	3.07513e-05	0.00800031	chr3R	22283970	22286703	CG14238	FBgn0039429	-197	1
126	chrX	4318811	4319673	863	Peak_12131	1669.91	-0.672943	0.211551	0.00146767	0.0655137	chrX	4306888	4378485	bi	FBgn0000179	0	4
	chrX	4318811	4319673	863	Peak_12131	1669.91	-0.672943	0.211551	0.00146767	0.0655137	chrX	4274790	4276499	CG12688	FBgn0029707	-42313	4
127	chr3R	27514711	27515574	864	Peak_11410	1133.14	-0.670558	0.215104	0.00182478	0.0724635	chr3R	27503868	27505602	CG11550	FBgn0039864	-9110	1
	chr3R	27514711	27515574	864	Peak_11410	1133.14	-0.670558	0.215104	0.00182478	0.0724635	chr3R	27495186	27503693	CG1815	FBgn0039863	-11019	1
128	chrX	19254972	19255679	708	Peak_13885	929.939	-0.670369	0.151176	9.23466e-06	0.00351715	chrX	19247213	19364074	kek5	FBgn0031016	0	2
	chrX	19254972	19255679	708	Peak_13885	929.939	-0.670369	0.151176	9.23466e-06	0.00351715	chrX	19221107	19242480	nAChRalpha7	FBgn0086778	-12493	2
129	chr3R	19026704	19027347	644	Peak_10466	1093.49	-0.670043	0.201988	0.000909097	0.050114	chr3R	19027365	19029756	fzo	FBgn0011596	19	2
	chr3R	19026704	19027347	644	Peak_10466	1093.49	-0.670043	0.201988	0.000909097	0.050114	chr3R	19011301	19019002	cnc	FBgn0262975	-7703	1
130	chr2L	3606329	3607243	915	Peak_458	1373.26	-0.669651	0.21566	0.00190196	0.0748195	chr2L	3604223	3606756	odd	FBgn0002985	0	1
	chr2L	3606329	3607243	915	Peak_458	1373.26	-0.669651	0.21566	0.00190196	0.0748195	chr2L	3619096	3621573	UGt36A1	FBgn0015663	11854	1
131	chr2L	16422560	16423235	676	Peak_1881	641.971	-0.668611	0.22012	0.00238561	0.0796374	chr2L	16417749	16417884	snoRNA:Me28S-A2958	FBgn0086037	-4677	1
	chr2L	16422560	16423235	676	Peak_1881	641.971	-0.668611	0.22012	0.00238561	0.0796374	chr2L	16400174	16405957	CG5888	FBgn0028523	-16604	1
132	chr2R	6046916	6047954	1039	Peak_3174	1235.95	-0.667796	0.167969	7.01725e-05	0.0133631	chr2R	6033401	6079899	KCNQ	FBgn0033494	0	1
	chr2R	6046916	6047954	1039	Peak_3174	1235.95	-0.667796	0.167969	7.01725e-05	0.0133631	chr2R	6043420	6046089	mlt	FBgn0265512	-828	1
133	chr2L	552207	553784	1578	Peak_101	1695.95	-0.667572	0.183588	0.000276643	0.0246726	chr2L	544924	552454	Ets21C	FBgn0005660	0	2
	chr2L	552207	553784	1578	Peak_101	1695.95	-0.667572	0.183588	0.000276643	0.0246726	chr2L	553741	559079	rempA	FBgn0260933	0	1
134	chr3R	3605367	3606431	1065	Peak_8634	793.27	-0.665869	0.195926	0.000677392	0.0396914	chr3R	3606605	3609168	CG18747	FBgn0042104	175	1
	chr3R	3605367	3606431	1065	Peak_8634	793.27	-0.665869	0.195926	0.000677392	0.0396914	chr3R	3609564	3611841	CG18745	FBgn0042102	3134	1
135	chr3L	5623550	5624219	670	Peak_5938	940.722	-0.664377	0.201073	0.00095262	0.0514968	chr3L	5624082	5645194	Blimp-1	FBgn0035625	0	1
	chr3L	5623550	5624219	670	Peak_5938	940.722	-0.664377	0.201073	0.00095262	0.0514968	chr3L	5600261	5601400	Eaf6	FBgn0035624	-22151	1
136	chr2R	13149125	13150796	1672	Peak_4112	3574.69	-0.663155	0.197942	0.00080738	0.0453422	chr2R	13104053	13266881	mbl	FBgn0265487	0	1
	chr2R	13149125	13150796	1672	Peak_4112	3574.69	-0.663155	0.197942	0.00080738	0.0453422	chr2R	13144660	13145391	CG43108	FBgn0262568	-3735	1
137	chr3L	3034974	3035760	787	Peak_5617	505.086	-0.657832	0.214178	0.00213037	0.0769812	chr3L	3035195	3040469	CG2162	FBgn0035388	0	1
	chr3L	3034974	3035760	787	Peak_5617	505.086	-0.657832	0.214178	0.00213037	0.0769812	chr3L	3042358	3044174	Jafrac2	FBgn0040308	6599	1
138	chr2L	12545777	12546891	1115	Peak_1485	922.95	-0.657449	0.217726	0.00253089	0.0815629	chr2L	12455539	12546611	bun	FBgn0259176	0	1
	chr2L	12545777	12546891	1115	Peak_1485	922.95	-0.657449	0.217726	0.00253089	0.0815629	chr2L	12508107	12508254	snoRNA:CG43051-a	FBgn0263458	-37524	1
139	chr3R	9700447	9701242	796	Peak_9355	1433.87	-0.655035	0.213171	0.00212049	0.0769812	chr3R	9693066	9700638	E5	FBgn0008646	0	1
	chr3R	9700447	9701242	796	Peak_9355	1433.87	-0.655035	0.213171	0.00212049	0.0769812	chr3R	9680320	9681176	CG14362	FBgn0038186	-19272	1
140	chr3R	21561255	21561782	528	Peak_10779	308.948	-0.654053	0.220668	0.00303693	0.0887207	chr3R	21567069	21586044	LpR1	FBgn0066101	5288	1
	chr3R	21561255	21561782	528	Peak_10779	308.948	-0.654053	0.220668	0.00303693	0.0887207	chr3R	21524448	21545839	LpR2	FBgn0051092	-15417	1
141	chr2R	11684688	11685572	885	Peak_3934	354.429	-0.653319	0.204789	0.00142173	0.0642675	chr2R	11650069	11702422	Zasp52	FBgn0265991	0	1
	chr2R	11684688	11685572	885	Peak_3934	354.429	-0.653319	0.204789	0.00142173	0.0642675	chr2R	11681504	11741094	tun	FBgn0034046	0	1
142	chr3L	12460908	12461660	753	Peak_6800	1367.55	-0.651655	0.216769	0.0026452	0.0839552	chr3L	12455636	12461121	eyg	FBgn0000625	0	1
	chr3L	12460908	12461660	753	Peak_6800	1367.55	-0.651655	0.216769	0.0026452	0.0839552	chr3L	12462171	12462884	CG32102	FBgn0052102	512	1
143	chrX	16806951	16807650	700	Peak_13555	567.561	-0.651119	0.210114	0.00194247	0.0753518	chrX	16807212	16831444	CG4928	FBgn0027556	0	1
	chrX	16806951	16807650	700	Peak_13555	567.561	-0.651119	0.210114	0.00194247	0.0753518	chrX	16790247	16791220	CG33252	FBgn0053252	-15732	1
144	chr2R	6115279	6115957	679	Peak_3183	943.16	-0.650979	0.187407	0.000513524	0.0330986	chr2R	6091499	6122112	Hr3	FBgn0000448	0	1
	chr2R	6115279	6115957	679	Peak_3183	943.16	-0.650979	0.187407	0.000513524	0.0330986	chr2R	6125492	6133582	Hdc	FBgn0005619	9536	1
145	chrX	5906513	5907899	1387	Peak_12300	1537.51	-0.649871	0.157987	3.89809e-05	0.0090728	chrX	5902215	5907214	mab-21	FBgn0029003	0	1
	chrX	5906513	5907899	1387	Peak_12300	1537.51	-0.649871	0.157987	3.89809e-05	0.0090728	chrX	5891540	5894830	CG4766	FBgn0027546	-11684	1
146	chrX	7585762	7586994	1233	Peak_12510	761.104	-0.649581	0.207599	0.00175395	0.0710201	chrX	7576370	7603418	CHES-1-like	FBgn0029504	0	1
	chrX	7585762	7586994	1233	Peak_12510	761.104	-0.649581	0.207599	0.00175395	0.0710201	chrX	7503180	7572292	ct	FBgn0004198	-13471	4
147	chrX	8785108	8786171	1064	Peak_12655	1398.61	-0.6477	0.178536	0.000285796	0.0246726	chrX	8767044	8785840	Moe	FBgn0011661	0	1
	chrX	8785108	8786171	1064	Peak_12655	1398.61	-0.6477	0.178536	0.000285796	0.0246726	chrX	8792586	8794297	CG1885	FBgn0030066	6416	1
148	chr3L	11480312	11481132	821	Peak_6685	575.347	-0.645561	0.210477	0.00216121	0.0769812	chr3L	11480649	11492155	chrb	FBgn0036165	0	1
	chr3L	11480312	11481132	821	Peak_6685	575.347	-0.645561	0.210477	0.00216121	0.0769812	chr3L	11468057	11468652	Vha16-2	FBgn0028668	-11661	1
149	chrX	1127800	1128575	776	Peak_11697	807.675	-0.644982	0.200239	0.00127719	0.0616115	chrX	1109321	1130717	CG3638	FBgn0261444	0	1
	chrX	1127800	1128575	776	Peak_11697	807.675	-0.644982	0.200239	0.00127719	0.0616115	chrX	1130905	1133917	CG11403	FBgn0026876	2331	1
150	chr2R	11989924	11992636	2713	Peak_3983	2251.9	-0.644285	0.182501	0.000415071	0.0293448	chr2R	11986810	11990113	CG8414	FBgn0034073	0	1
	chr2R	11989924	11992636	2713	Peak_3983	2251.9	-0.644285	0.182501	0.000415071	0.0293448	chr2R	11990191	11993994	Rho1	FBgn0014020	0	1
151	chrX	18206403	18207226	824	Peak_13737	1712.72	-0.642232	0.215026	0.00281947	0.0855955	chrX	18208156	18209934	CG6023	FBgn0030912	931	2
	chrX	18206403	18207226	824	Peak_13737	1712.72	-0.642232	0.215026	0.00281947	0.0855955	chrX	18199386	18203162	upd1	FBgn0004956	-3242	2
152	chr3L	2808046	2809045	1000	Peak_5592	1039.85	-0.64162	0.197914	0.00118727	0.060269	chr3L	2786206	2879158	Tet	FBgn0263392	0	1
	chr3L	2808046	2809045	1000	Peak_5592	1039.85	-0.64162	0.197914	0.00118727	0.060269	chr3L	2782254	2786010	Pgant6	FBgn0035375	-22037	1
153	chrX	1942870	1944966	2097	Peak_11811	2247.13	-0.641201	0.213417	0.00266059	0.0840522	chrX	1935900	1949447	CG4313	FBgn0025632	0	1
	chrX	1942870	1944966	2097	Peak_11811	2247.13	-0.641201	0.213417	0.00266059	0.0840522	chrX	1938324	1942428	moody	FBgn0025631	-443	1
154	chr3R	6442318	6443214	897	Peak_9035	1342.27	-0.640962	0.210858	0.00236754	0.0796374	chr3R	6333282	6439998	hth	FBgn0001235	-2321	2
	chr3R	6442318	6443214	897	Peak_9035	1342.27	-0.640962	0.210858	0.00236754	0.0796374	chr3R	6501281	6502973	CG6465	FBgn0037818	58068	2
155	chr2R	3609972	3610909	938	Peak_2839	1057.87	-0.636611	0.171378	0.000203478	0.0211829	chr2R	3604312	3615015	CG18812	FBgn0042135	0	1
	chr2R	3609972	3610909	938	Peak_2839	1057.87	-0.636611	0.171378	0.000203478	0.0211829	chr2R	3602427	3604286	CG1946	FBgn0033216	-5687	1
156	chr2L	547932	549063	1132	Peak_100	806.656	-0.633378	0.216558	0.0034474	0.0943299	chr2L	544924	552454	Ets21C	FBgn0005660	0	2
	chr2L	547932	549063	1132	Peak_100	806.656	-0.633378	0.216558	0.0034474	0.0943299	chr2L	545128	547096	nAChRbeta3	FBgn0031261	-837	1
157	chrX	3055631	3057423	1793	Peak_11987	4059.93	-0.630257	0.216209	0.0035564	0.0949016	chrX	3028902	3066254	N	FBgn0004647	0	1
	chrX	3055631	3057423	1793	Peak_11987	4059.93	-0.630257	0.216209	0.0035564	0.0949016	chrX	3066300	3067173	CG18508	FBgn0028746	8878	1
158	chrX	18586709	18587561	853	Peak_13786	454.701	-0.628094	0.204814	0.00216463	0.0769812	chrX	18582570	18587075	Cyp18a1	FBgn0010383	0	1
	chrX	18586709	18587561	853	Peak_13786	454.701	-0.628094	0.204814	0.00216463	0.0769812	chrX	18601526	18620605	CCKLR-17D1	FBgn0259231	13966	1
159	chr3L	2576665	2577662	998	Peak_5571	439.556	-0.627879	0.219025	0.00414779	0.0989911	chr3L	2554846	2586540	msn	FBgn0010909	0	2
	chr3L	2576665	2577662	998	Peak_5571	439.556	-0.627879	0.219025	0.00414779	0.0989911	chr3L	2587455	2588883	RpL8	FBgn0261602	9794	2
160	chrX	10451057	10451986	930	Peak_12834	1093.4	-0.627506	0.218241	0.00403664	0.0980653	chrX	10459874	10460624	CG15296	FBgn0030215	7889	1
	chrX	10451057	10451986	930	Peak_12834	1093.4	-0.627506	0.218241	0.00403664	0.0980653	chrX	10483121	10484018	Rab9D	FBgn0067052	31136	1
161	chr3R	10522299	10523313	1015	Peak_9478	928.109	-0.626127	0.17455	0.000334377	0.0258466	chr3R	10490628	10523014	Meltrin	FBgn0265140	0	1
	chr3R	10522299	10523313	1015	Peak_9478	928.109	-0.626127	0.17455	0.000334377	0.0258466	chr3R	10523410	10549983	kibra	FBgn0262127	98	1
162	chr3R	25597143	25598109	967	Peak_11175	1606.03	-0.62342	0.205886	0.00246186	0.080578	chr3R	25591716	25619835	kay	FBgn0001297	0	1
	chr3R	25597143	25598109	967	Peak_11175	1606.03	-0.62342	0.205886	0.00246186	0.080578	chr3R	25604994	25606174	fig	FBgn0039694	6886	1
163	chr4	1000293	1001106	814	Peak_11545	571.11	-0.623279	0.20969	0.00295492	0.087799	chr4	995793	996436	sphinx	FBgn0083990	-3858	1
	chr4	1000293	1001106	814	Peak_11545	571.11	-0.623279	0.20969	0.00295492	0.087799	chr4	1010350	1026914	toy	FBgn0019650	9245	1
164	chr3R	24410885	24411844	960	Peak_11024	1101.27	-0.622121	0.207188	0.00267614	0.0840522	chr3R	24406697	24410986	fkh	FBgn0000659	0	1
	chr3R	24410885	24411844	960	Peak_11024	1101.27	-0.622121	0.207188	0.00267614	0.0840522	chr3R	24411769	24413849	Noa36	FBgn0026400	0	1
165	chr3L	4825355	4826079	725	Peak_5887	784.638	-0.62089	0.200189	0.00192532	0.0753518	chr3L	4807367	4825687	Dhc64C	FBgn0261797	0	1
	chr3L	4825355	4826079	725	Peak_5887	784.638	-0.62089	0.200189	0.00192532	0.0753518	chr3L	4825852	4829038	LeuRS-m	FBgn0027085	0	1
166	chr2L	7495257	7496618	1362	Peak_912	1394.57	-0.619724	0.205023	0.00250532	0.0814044	chr2L	7472512	7496307	Ziz	FBgn0260486	0	1
	chr2L	7495257	7496618	1362	Peak_912	1394.57	-0.619724	0.205023	0.00250532	0.0814044	chr2L	7496790	7497365	Obp28a	FBgn0011283	173	1
167	chr3L	1007617	1008377	761	Peak_5375	296.703	-0.619039	0.208868	0.00303889	0.0887207	chr3L	995981	1000567	trio	FBgn0024277	-7051	1
	chr3L	1007617	1008377	761	Peak_5375	296.703	-0.619039	0.208868	0.00303889	0.0887207	chr3L	993982	995703	CG12038	FBgn0035179	-11915	1
168	chr3R	12528446	12529138	693	Peak_9752	1100.11	-0.614446	0.21208	0.00376466	0.0972917	chr3R	12482344	12560148	Ubx	FBgn0003944	0	1
	chr3R	12528446	12529138	693	Peak_9752	1100.11	-0.614446	0.21208	0.00376466	0.0972917	chr3R	12567846	12598911	bxd	FBgn0020556	38709	2
169	chr3L	10729750	10730900	1151	Peak_6534	2041.77	-0.61387	0.197254	0.00185779	0.0734265	chr3L	10765024	10766499	CG43245	FBgn0262890	34125	2
	chr3L	10729750	10730900	1151	Peak_6534	2041.77	-0.61387	0.197254	0.00185779	0.0734265	chr3L	10687459	10689977	NijA	FBgn0036101	-39774	1
170	chr3R	10198484	10199667	1184	Peak_9428	877.143	-0.611769	0.20678	0.0030909	0.0893056	chr3R	10197396	10197468	snoRNA:Me18S-G1189	FBgn0086058	-1017	1
	chr3R	10198484	10199667	1184	Peak_9428	877.143	-0.611769	0.20678	0.0030909	0.0893056	chr3R	10155134	10195730	NK7.1	FBgn0024321	-2755	2
171	chr3L	10764409	10766380	1972	Peak_6544	1579.12	-0.610326	0.204995	0.00290816	0.086717	chr3L	10765024	10766499	CG43245	FBgn0262890	0	2
	chr3L	10764409	10766380	1972	Peak_6544	1579.12	-0.610326	0.204995	0.00290816	0.086717	chr3L	10794289	10795450	CG12523	FBgn0036102	27910	1
172	chrX	7501906	7502757	852	Peak_12500	1158.71	-0.609856	0.208453	0.00343759	0.0943299	chrX	7503180	7572292	ct	FBgn0004198	424	4
	chrX	7501906	7502757	852	Peak_12500	1158.71	-0.609856	0.208453	0.00343759	0.0943299	chrX	7479335	7480164	CG12689	FBgn0029952	-21743	3
173	chr3R	22014278	22014865	588	Peak_10839	566.97	-0.609501	0.191975	0.00149891	0.0655137	chr3R	22012739	22014529	CG6073	FBgn0039417	0	1
	chr3R	22014278	22014865	588	Peak_10839	566.97	-0.609501	0.191975	0.00149891	0.0655137	chr3R	22014725	22015699	CG34130	FBgn0083966	0	1
174	chr3R	19040624	19041677	1054	Peak_10467	600.902	-0.609065	0.19692	0.00198169	0.0754753	chr3R	19027365	19029756	fzo	FBgn0011596	-10869	2
	chr3R	19040624	19041677	1054	Peak_10467	600.902	-0.609065	0.19692	0.00198169	0.0754753	chr3R	19053448	19074625	CG4467	FBgn0039064	11772	1
175	chr2R	18129331	18129933	603	Peak_4758	741.505	-0.607888	0.211538	0.00405747	0.0982588	chr2R	18131467	18173974	dve	FBgn0020307	1535	1
	chr2R	18129331	18129933	603	Peak_4758	741.505	-0.607888	0.211538	0.00405747	0.0982588	chr2R	18111185	18116079	Oatp58Dc	FBgn0034716	-13253	1
176	chr3L	2493321	2494092	772	Peak_5563	352.867	-0.605297	0.194169	0.00182466	0.0724635	chr3L	2488803	2492613	CG1146	FBgn0035346	-709	1
	chr3L	2493321	2494092	772	Peak_5563	352.867	-0.605297	0.194169	0.00182466	0.0724635	chr3L	2499371	2503606	CG16758	FBgn0035348	5280	1
177	chr3L	20688288	20689075	788	Peak_7881	1034.01	-0.604093	0.203787	0.00303345	0.0887207	chr3L	20685429	20688478	kni	FBgn0001320	0	1
	chr3L	20688288	20689075	788	Peak_7881	1034.01	-0.604093	0.203787	0.00303345	0.0887207	chr3L	20705937	20712300	cmpy	FBgn0037015	16863	1
178	chr2L	5421440	5422150	711	Peak_660	788.885	-0.602775	0.210526	0.00419404	0.0989911	chr2L	5404279	5415928	H15	FBgn0016660	-5513	2
	chr2L	5421440	5422150	711	Peak_660	788.885	-0.602775	0.210526	0.00419404	0.0989911	chr2L	5437633	5437749	snoRNA:Me28S-A2486	FBgn0086033	15484	2
179	chrX	3570644	3572037	1394	Peak_12038	1918.15	-0.602299	0.198787	0.00244653	0.080578	chrX	3565833	3594813	Mnt	FBgn0023215	0	1
	chrX	3570644	3572037	1394	Peak_12038	1918.15	-0.602299	0.198787	0.00244653	0.080578	chrX	3562869	3565535	Parg	FBgn0023216	-5110	1
180	chr2L	1972569	1973275	707	Peak_269	1140.9	-0.601864	0.207434	0.00371424	0.0969522	chr2L	1973956	1975413	Der-1	FBgn0267972	682	1
	chr2L	1972569	1973275	707	Peak_269	1140.9	-0.601864	0.207434	0.00371424	0.0969522	chr2L	1975462	1980755	CG15356	FBgn0031377	2188	1
181	chrX	12678806	12679323	518	Peak_13087	419.488	-0.599736	0.204897	0.00342244	0.0943299	chrX	12665876	12678991	CG32647	FBgn0052647	0	1
	chrX	12678806	12679323	518	Peak_13087	419.488	-0.599736	0.204897	0.00342244	0.0943299	chrX	12679595	12791360	Pde9	FBgn0259171	273	1
182	chr2L	16485580	16487106	1527	Peak_1892	2104.39	-0.598128	0.187088	0.00138842	0.0638393	chr2L	16466511	16485998	dac	FBgn0005677	0	1
	chr2L	16485580	16487106	1527	Peak_1892	2104.39	-0.598128	0.187088	0.00138842	0.0638393	chr2L	16488147	16490182	CG4580	FBgn0032585	1042	1
183	chr3R	2826249	2827122	874	Peak_8557	2299.98	-0.592295	0.204709	0.00381161	0.0975301	chr3R	2721974	2824950	Antp	FBgn0260642	-1300	1
	chr3R	2826249	2827122	874	Peak_8557	2299.98	-0.592295	0.204709	0.00381161	0.0975301	chr3R	2878056	2880263	Sodh-1	FBgn0024289	50935	2
184	chr3R	13769363	13769993	631	Peak_9859	723.845	-0.588797	0.194338	0.00244748	0.080578	chr3R	13745553	13844614	cpo	FBgn0263995	0	1
	chr3R	13769363	13769993	631	Peak_9859	723.845	-0.588797	0.194338	0.00244748	0.080578	chr3R	13698469	13742300	Rim	FBgn0053547	-27064	1
185	chrX	7520746	7521762	1017	Peak_12503	1554.86	-0.587768	0.200603	0.00338956	0.0943299	chrX	7503180	7572292	ct	FBgn0004198	0	4
	chrX	7520746	7521762	1017	Peak_12503	1554.86	-0.587768	0.200603	0.00338956	0.0943299	chrX	7479335	7480164	CG12689	FBgn0029952	-40583	3
186	chr2L	6791886	6792460	575	Peak_809	608.046	-0.586683	0.181014	0.00119074	0.060269	chr2L	6789769	6794599	nrv2	FBgn0015777	0	1
	chr2L	6791886	6792460	575	Peak_809	608.046	-0.586683	0.181014	0.00119074	0.060269	chr2L	6778554	6786861	nrv1	FBgn0015776	-5026	1
187	chr2R	9426907	9427716	810	Peak_3647	865.73	-0.583983	0.171297	0.000651573	0.0387201	chr2R	9424875	9427173	CG6145	FBgn0033853	0	1
	chr2R	9426907	9427716	810	Peak_3647	865.73	-0.583983	0.171297	0.000651573	0.0387201	chr2R	9400636	9420494	Vmat	FBgn0260964	-6414	1
188	chr3R	2862713	2863779	1067	Peak_8564	2085.14	-0.583612	0.19438	0.00267836	0.0840522	chr3R	2878056	2880263	Sodh-1	FBgn0024289	14278	2
	chr3R	2862713	2863779	1067	Peak_8564	2085.14	-0.583612	0.19438	0.00267836	0.0840522	chr3R	2880307	2884393	CG1979	FBgn0026563	16529	1
189	chr3R	18498799	18500100	1302	Peak_10423	388.774	-0.583572	0.183872	0.00150457	0.0655137	chr3R	18465529	18507898	wake	FBgn0266418	0	1
	chr3R	18498799	18500100	1302	Peak_10423	388.774	-0.583572	0.183872	0.00150457	0.0655137	chr3R	18510727	18512232	Gclm	FBgn0046114	10628	1
190	chr3L	16044810	16046125	1316	Peak_7258	909.79	-0.582433	0.20232	0.00399233	0.0980653	chr3L	16045058	16075126	Mbs	FBgn0005536	0	1
	chr3L	16044810	16046125	1316	Peak_7258	909.79	-0.582433	0.20232	0.00399233	0.0980653	chr3L	16031509	16039946	Diap1	FBgn0260635	-4865	1
191	chrX	12364117	12364704	588	Peak_13032	516.482	-0.579211	0.194512	0.00290352	0.086717	chrX	12357560	12372464	CG42258	FBgn0259143	0	1
	chrX	12364117	12364704	588	Peak_13032	516.482	-0.579211	0.194512	0.00290352	0.086717	chrX	12353828	12357145	Rab40	FBgn0030391	-6973	1
192	chr2R	6315292	6316722	1431	Peak_3198	1126.08	-0.577533	0.189731	0.00233488	0.0792636	chr2R	6314384	6315420	CG12896	FBgn0033521	0	1
	chr2R	6315292	6316722	1431	Peak_3198	1126.08	-0.577533	0.189731	0.00233488	0.0792636	chr2R	6317212	6324086	RanBPM	FBgn0262114	491	1
193	chr3R	5753997	5755089	1093	Peak_8942	1279.61	-0.575628	0.161153	0.000354358	0.0267492	chr3R	5700402	5814598	Glut4EF	FBgn0267336	0	2
	chr3R	5753997	5755089	1093	Peak_8942	1279.61	-0.575628	0.161153	0.000354358	0.0267492	chr3R	5808537	5811782	Art4	FBgn0037770	53449	1
194	chr3R	14411147	14411558	412	Peak_9938	298.588	-0.57552	0.198169	0.0036821	0.0967157	chr3R	14398812	14416448	CG7694	FBgn0038627	0	1
	chr3R	14411147	14411558	412	Peak_9938	298.588	-0.57552	0.198169	0.0036821	0.0967157	chr3R	14398812	14415175	fray	FBgn0023083	0	1
195	chr2R	9806927	9807572	646	Peak_3683	470.518	-0.575414	0.201069	0.00421274	0.0991533	chr2R	9751741	9813008	shot	FBgn0013733	0	1
	chr2R	9806927	9807572	646	Peak_3683	470.518	-0.575414	0.201069	0.00421274	0.0991533	chr2R	9830038	9830882	DJ-1alpha	FBgn0033885	22467	1
196	chr2R	15042372	15042972	601	Peak_4378	381.464	-0.574772	0.196976	0.00352309	0.0943299	chr2R	15029136	15049602	ena	FBgn0000578	0	1
	chr2R	15042372	15042972	601	Peak_4378	381.464	-0.574772	0.196976	0.00352309	0.0943299	chr2R	15051647	15065728	CG10737	FBgn0034420	8676	1
197	chr3L	11001914	11002769	856	Peak_6601	765.294	-0.574398	0.17794	0.00124644	0.0610756	chr3L	10974270	11002288	klu	FBgn0013469	0	2
	chr3L	11001914	11002769	856	Peak_6601	765.294	-0.574398	0.17794	0.00124644	0.0610756	chr3L	10994508	10994589	snoRNA:Me18S-G962	FBgn0086077	-7326	2
198	chr2L	15333398	15334124	727	Peak_1799	1424.99	-0.573122	0.199177	0.00400896	0.0980653	chr2L	15333865	15336138	esg	FBgn0001981	0	1
	chr2L	15333398	15334124	727	Peak_1799	1424.99	-0.573122	0.199177	0.00400896	0.0980653	chr2L	15317953	15318901	nht	FBgn0041103	-14498	1
199	chr2R	6451566	6452807	1242	Peak_3225	1224.1	-0.571355	0.186867	0.00223158	0.0769812	chr2R	6445392	6504785	psq	FBgn0263102	0	2
	chr2R	6451566	6452807	1242	Peak_3225	1224.1	-0.571355	0.186867	0.00223158	0.0769812	chr2R	6432429	6434765	acal	FBgn0283426	-16802	1
200	chr2L	16532685	16533771	1087	Peak_1899	1443.62	-0.571271	0.17046	0.000804201	0.0453422	chr2L	16508077	16532877	CG5953	FBgn0032587	0	2
	chr2L	16532685	16533771	1087	Peak_1899	1443.62	-0.571271	0.17046	0.000804201	0.0453422	chr2L	16528822	16528922	snoRNA:Me28S-C1237	FBgn0086038	-3764	1
201	chrX	12643931	12647180	3250	Peak_13081	5990	-0.571123	0.193437	0.00315215	0.0907624	chrX	12638244	12642400	CG4004	FBgn0030418	-1532	1
	chrX	12643931	12647180	3250	Peak_13081	5990	-0.571123	0.193437	0.00315215	0.0907624	chrX	12651068	12654650	ade5	FBgn0068001	3889	1
202	chrX	13457507	13458400	894	Peak_13174	1310.1	-0.560958	0.194947	0.00400849	0.0980653	chrX	13457855	13484603	Tpst	FBgn0086674	0	1
	chrX	13457507	13458400	894	Peak_13174	1310.1	-0.560958	0.194947	0.00400849	0.0980653	chrX	13455703	13456907	CG32633	FBgn0052633	-601	1
203	chr4	827583	829099	1517	Peak_11533	1230.57	-0.560576	0.191067	0.00334707	0.0943299	chr4	821061	855019	Sox102F	FBgn0039938	0	1
	chr4	827583	829099	1517	Peak_11533	1230.57	-0.560576	0.191067	0.00334707	0.0943299	chr4	799141	809604	MED26	FBgn0039923	-17980	1
204	chrX	18757575	18759720	2146	Peak_13808	2310.43	-0.556864	0.173646	0.0013418	0.0627355	chrX	18755229	18757809	CG7326	FBgn0030970	0	1
	chrX	18757575	18759720	2146	Peak_13808	2310.43	-0.556864	0.173646	0.0013418	0.0627355	chrX	18757982	18778108	CG34401	FBgn0085430	0	1
205	chr3L	5544081	5544611	531	Peak_5917	405.25	-0.554058	0.192077	0.00391957	0.0978603	chr3L	5531510	5544254	frm	FBgn0035612	0	1
	chr3L	5544081	5544611	531	Peak_5917	405.25	-0.554058	0.192077	0.00391957	0.0978603	chr3L	5552569	5554698	sinu	FBgn0010894	7959	1
206	chr2R	2019237	2019910	674	Peak_2608	924.118	-0.546897	0.178557	0.0021923	0.0769812	chr2R	1975377	2019346	EcR	FBgn0000546	0	2
	chr2R	2019237	2019910	674	Peak_2608	924.118	-0.546897	0.178557	0.0021923	0.0769812	chr2R	2024807	2025916	CG14589	FBgn0033063	4898	1
207	chrX	17780138	17781718	1581	Peak_13695	1249.29	-0.546756	0.190532	0.00410958	0.0989598	chrX	17782209	17783437	CG6788	FBgn0030880	492	1
	chrX	17780138	17781718	1581	Peak_13695	1249.29	-0.546756	0.190532	0.00410958	0.0989598	chrX	17777750	17779271	CG12985	FBgn0030881	-868	1
208	chr2L	19508272	19509075	804	Peak_2192	677.165	-0.544872	0.173567	0.00169374	0.0706063	chr2L	19502334	19508764	CG10188	FBgn0032796	0	1
	chr2L	19508272	19509075	804	Peak_2192	677.165	-0.544872	0.173567	0.00169374	0.0706063	chr2L	19508952	19517204	Hasp	FBgn0032797	0	1
209	chr3R	5934802	5936114	1313	Peak_8964	1061.24	-0.536141	0.158222	0.000702659	0.040886	chr3R	5927141	5935843	Fmr1	FBgn0028734	0	1
	chr3R	5934802	5936114	1313	Peak_8964	1061.24	-0.536141	0.158222	0.000702659	0.040886	chr3R	5937958	5945146	CG3940	FBgn0037788	1845	1
210	chr2R	19519582	19520260	679	Peak_4939	605.341	-0.532146	0.179189	0.00298048	0.0882453	chr2R	19520132	19542343	retn	FBgn0004795	0	1
	chr2R	19519582	19520260	679	Peak_4939	605.341	-0.532146	0.179189	0.00298048	0.0882453	chr2R	19491244	19504277	Eglp2	FBgn0034883	-15306	1
211	chrX	6624310	6625643	1334	Peak_12390	754.349	-0.531355	0.1832	0.00372687	0.0969795	chrX	6614036	6624566	CG3168	FBgn0029896	0	1
	chrX	6624310	6625643	1334	Peak_12390	754.349	-0.531355	0.1832	0.00372687	0.0969795	chrX	6635569	6638271	RpL17	FBgn0029897	9927	1
212	chr3R	912186	914128	1943	Peak_8317	2221.02	-0.529498	0.18246	0.003708	0.0969522	chr3R	903500	912794	corto	FBgn0010313	0	1
	chr3R	912186	914128	1943	Peak_8317	2221.02	-0.529498	0.18246	0.003708	0.0969522	chr3R	934399	934900	CG43131	FBgn0262605	20272	1
213	chr2L	10756096	10756597	502	Peak_1293	423.872	-0.528607	0.172716	0.00220926	0.0769812	chr2L	10744074	10756325	CG17124	FBgn0032297	0	1
	chr2L	10756096	10756597	502	Peak_1293	423.872	-0.528607	0.172716	0.00220926	0.0769812	chr2L	10751876	10751938	mir-9378	FBgn0283551	-4159	1
214	chr3L	18009572	18010149	578	Peak_7549	590.58	-0.526741	0.183953	0.00419045	0.0989911	chr3L	17944052	18057796	Eip75B	FBgn0000568	0	2
	chr3L	18009572	18010149	578	Peak_7549	590.58	-0.526741	0.183953	0.00419045	0.0989911	chr3L	17996077	17996178	snoRNA:Me28S-A30	FBgn0086081	-13395	1
215	chr2R	7513299	7514388	1090	Peak_3390	696.177	-0.519254	0.17927	0.0037737	0.0972917	chr2R	7506983	7520020	CG9005	FBgn0033638	0	2
	chr2R	7513299	7514388	1090	Peak_3390	696.177	-0.519254	0.17927	0.0037737	0.0972917	chr2R	7504373	7506528	Egm	FBgn0086712	-6772	1
216	chr3L	18793098	18794829	1732	Peak_7642	2051.64	-0.516942	0.171832	0.0026262	0.0839552	chr3L	18795364	18813775	CG14073	FBgn0036814	536	1
	chr3L	18793098	18794829	1732	Peak_7642	2051.64	-0.516942	0.171832	0.0026262	0.0839552	chr3L	18814270	18815453	HipHop	FBgn0036815	19442	1
217	chr3L	2191959	2192582	624	Peak_5534	473.431	-0.513023	0.178816	0.00411776	0.0989598	chr3L	2189159	2192221	CG5707	FBgn0026593	0	1
	chr3L	2191959	2192582	624	Peak_5534	473.431	-0.513023	0.178816	0.00411776	0.0989598	chr3L	2185929	2187676	CG13810	FBgn0035313	-4284	1
218	chr2L	16520114	16521861	1748	Peak_1897	1095.4	-0.509068	0.16044	0.00150903	0.0655137	chr2L	16508077	16532877	CG5953	FBgn0032587	0	2
	chr2L	16520114	16521861	1748	Peak_1897	1095.4	-0.509068	0.16044	0.00150903	0.0655137	chr2L	16528374	16528491	mir-4943	FBgn0263555	6514	1
219	chrX	4976337	4979056	2720	Peak_12218	2815.67	-0.506622	0.168504	0.00264204	0.0839552	chrX	4965059	4977058	CG32767	FBgn0052767	0	2
	chrX	4976337	4979056	2720	Peak_12218	2815.67	-0.506622	0.168504	0.00264204	0.0839552	chrX	4979791	5148897	rg	FBgn0266098	736	1
220	chrX	7861061	7862498	1438	Peak_12547	923.425	-0.506212	0.176062	0.00403778	0.0980653	chrX	7850852	7862269	sws	FBgn0003656	0	1
	chrX	7861061	7862498	1438	Peak_12547	923.425	-0.506212	0.176062	0.00403778	0.0980653	chrX	7858056	7880118	sn	FBgn0003447	0	1
221	chr2L	7983949	7984503	555	Peak_969	842.755	-0.503457	0.172308	0.00347958	0.0943299	chr2L	7891186	7984196	Snoo	FBgn0085450	0	1
	chr2L	7983949	7984503	555	Peak_969	842.755	-0.503457	0.172308	0.00347958	0.0943299	chr2L	7983945	7986785	CG7231	FBgn0031968	0	1
222	chr2L	3631910	3633302	1393	Peak_462	1833.03	-0.500093	0.172625	0.00376767	0.0972917	chr2L	3622073	3632154	for	FBgn0000721	0	1
	chr2L	3631910	3633302	1393	Peak_462	1833.03	-0.500093	0.172625	0.00376767	0.0972917	chr2L	3636966	3637073	mir-4972	FBgn0263523	3665	1

## Sheet: MS peak genes
Peak Attributes							Young Damaged vs. Old Damaged				Gene Attributes
Rank	Chr	Start	End	Width	Peak ID	BaseMean	log2 Fold Change	Standard Error	P Value	Adjusted P Value	chr	start	end	gene_ID	FBgn	Distance peak-gene	Total peaks at gene
1	chr2L	1927377	1927817	441	Peak_265	159.301	1.66729	0.313215	1.01998e-07	1.19161e-05	chr2L	1884621	1943461	Wdr62	FBgn0031374	0	2
	chr2L	1927377	1927817	441	Peak_265	159.301	1.66729	0.313215	1.01998e-07	1.19161e-05	chr2L	1945149	1945709	CG15357	FBgn0040719	17333	1
2	chr3L	2130150	2130496	347	Peak_5522	74.183	1.60436	0.337997	2.06785e-06	0.000125996	chr3L	2117465	2151700	zormin	FBgn0052311	0	2
	chr3L	2130150	2130496	347	Peak_5522	74.183	1.60436	0.337997	2.06785e-06	0.000125996	chr3L	2039680	2115611	sls	FBgn0086906	-14540	1
3	chrX	8937921	8938299	379	Peak_12671	131.655	1.57896	0.291649	6.16585e-08	7.85229e-06	chrX	8924237	8947352	Nost	FBgn0259734	0	3
	chrX	8937921	8938299	379	Peak_12671	131.655	1.57896	0.291649	6.16585e-08	7.85229e-06	chrX	8948730	8962016	CG15365	FBgn0030077	10432	2
4	chr3L	13212545	13213147	603	Peak_6927	123.522	1.55091	0.364156	2.05414e-05	0.000740747	chr3L	13221791	13272742	caps	FBgn0023095	8645	2
	chr3L	13212545	13213147	603	Peak_6927	123.522	1.55091	0.364156	2.05414e-05	0.000740747	chr3L	13239963	13241802	CG32119	FBgn0052119	26817	2
5	chr3R	17030457	17030797	341	Peak_10213	95.79	1.55033	0.296118	1.64516e-07	1.72267e-05	chr3R	16966460	17038409	SNF4Agamma	FBgn0264357	0	2
	chr3R	17030457	17030797	341	Peak_10213	95.79	1.55033	0.296118	1.64516e-07	1.72267e-05	chr3R	17040800	17041948	CG5862	FBgn0038868	10004	2
6	chr3R	27318476	27318926	451	Peak_11375	125.63	1.5476	0.323682	1.74224e-06	0.000111441	chr3R	27324956	27332714	mey	FBgn0039851	6031	1
	chr3R	27318476	27318926	451	Peak_11375	125.63	1.5476	0.323682	1.74224e-06	0.000111441	chr3R	27289022	27289856	CG11333	FBgn0039850	-28621	1
7	chr3L	18388696	18389034	339	Peak_7614	73.4619	1.54715	0.386519	6.25996e-05	0.00173232	chr3L	18390634	18391535	rpr	FBgn0011706	1601	1
	chr3L	18388696	18389034	339	Peak_7614	73.4619	1.54715	0.386519	6.25996e-05	0.00173232	chr3L	18431660	18433042	skl	FBgn0036786	42627	1
8	chrX	1885924	1886278	355	Peak_11802	91.935	1.5244	0.329767	3.78838e-06	0.00020285	chrX	1835972	1899495	Hr4	FBgn0264562	0	1
	chrX	1885924	1886278	355	Peak_11802	91.935	1.5244	0.329767	3.78838e-06	0.00020285	chrX	1901943	1903397	PIG-K	FBgn0023545	15666	1
9	chr2R	18537149	18537615	467	Peak_4815	118.47	1.49876	0.321554	3.14698e-06	0.000176531	chr2R	18536499	18537255	CG3746	FBgn0034755	0	1
	chr2R	18537149	18537615	467	Peak_4815	118.47	1.49876	0.321554	3.14698e-06	0.000176531	chr2R	18538060	18541100	nsr	FBgn0034740	446	1
10	chr2L	4656793	4657207	415	Peak_567	101.682	1.49312	0.343228	1.35997e-05	0.000544988	chr2L	4655477	4656209	lncRNA:TS6	FBgn0284415	-585	1
	chr2L	4656793	4657207	415	Peak_567	101.682	1.49312	0.343228	1.35997e-05	0.000544988	chr2L	4651402	4652877	CG3355	FBgn0031619	-3917	1
11	chr2R	8858231	8858715	485	Peak_3578	186.887	1.48046	0.351684	2.55773e-05	0.000886178	chr2R	8853501	8868499	Psc	FBgn0005624	0	1
	chr2R	8858231	8858715	485	Peak_3578	186.887	1.48046	0.351684	2.55773e-05	0.000886178	chr2R	8840616	8843217	CG13321	FBgn0033787	-15015	1
12	chr3L	21785770	21786057	288	Peak_8039	73.8756	1.47466	0.347029	2.14361e-05	0.000768446	chr3L	21801802	21810700	eg	FBgn0000560	15746	2
	chr3L	21785770	21786057	288	Peak_8039	73.8756	1.47466	0.347029	2.14361e-05	0.000768446	chr3L	21806104	21806798	CG43895	FBgn0264487	20048	1
13	chrX	20041420	20042328	909	Peak_13977	250.17	1.46614	0.314371	3.10554e-06	0.0001749	chrX	20042156	20049547	CG9572	FBgn0031089	0	1
	chrX	20041420	20042328	909	Peak_13977	250.17	1.46614	0.314371	3.10554e-06	0.0001749	chrX	20035851	20037221	Or19a	FBgn0041626	-4200	1
14	chrX	4953709	4954211	503	Peak_12215	157.135	1.46203	0.372984	8.86134e-05	0.00225701	chrX	4942305	4964962	ovo	FBgn0003028	0	2
	chrX	4953709	4954211	503	Peak_12215	157.135	1.46203	0.372984	8.86134e-05	0.00225701	chrX	4965059	4977058	CG32767	FBgn0052767	10849	1
15	chr2L	11247295	11248421	1127	Peak_1358	267.019	1.41835	0.291936	1.1832e-06	8.09438e-05	chr2L	11210677	11260808	ab	FBgn0264442	0	2
	chr2L	11247295	11248421	1127	Peak_1358	267.019	1.41835	0.291936	1.1832e-06	8.09438e-05	chr2L	11234834	11234912	snoRNA:Me18S-G642	FBgn0086035	-12384	1
16	chrX	3291846	3292337	492	Peak_12013	122.84	1.38917	0.346953	6.2304e-05	0.00173031	chrX	3281976	3342976	CG12535	FBgn0029657	0	3
	chrX	3291846	3292337	492	Peak_12013	122.84	1.38917	0.346953	6.2304e-05	0.00173031	chrX	3267191	3280044	Myc	FBgn0262656	-11803	3
17	chr2R	6162839	6163323	485	Peak_3190	149.036	1.38825	0.332463	2.97125e-05	0.000986699	chr2R	6156520	6194529	CAP	FBgn0033504	0	1
	chr2R	6162839	6163323	485	Peak_3190	149.036	1.38825	0.332463	2.97125e-05	0.000986699	chr2R	6152561	6156710	CG12910	FBgn0033502	-6130	1
18	chr2R	11362284	11362734	451	Peak_3893	106.861	1.38225	0.323375	1.91613e-05	0.000701719	chr2R	11359679	11370339	CG8180	FBgn0034021	0	1
	chr2R	11362284	11362734	451	Peak_3893	106.861	1.38225	0.323375	1.91613e-05	0.000701719	chr2R	11373457	11384736	CG12964	FBgn0034022	10724	1
19	chr3R	1037734	1038272	539	Peak_8335	181.707	1.38075	0.291168	2.1152e-06	0.000127236	chr3R	995725	1043178	cno	FBgn0259212	0	1
	chr3R	1037734	1038272	539	Peak_8335	181.707	1.38075	0.291168	2.1152e-06	0.000127236	chr3R	1043472	1045250	Prosbeta2R2	FBgn0037296	5201	1
20	chr3L	783011	783300	290	Peak_5346	86.1812	1.37379	0.281854	1.09301e-06	7.68694e-05	chr3L	803426	804051	CG13898	FBgn0035161	20127	1
	chr3L	783011	783300	290	Peak_5346	86.1812	1.37379	0.281854	1.09301e-06	7.68694e-05	chr3L	737679	755489	hng3	FBgn0035160	-27523	1
21	chr3L	16814205	16814550	346	Peak_7384	84.179	1.36497	0.333006	4.15068e-05	0.0012564	chr3L	16802757	16822174	CG13024	FBgn0036665	0	3
	chr3L	16814205	16814550	346	Peak_7384	84.179	1.36497	0.333006	4.15068e-05	0.0012564	chr3L	16798093	16812632	nudC	FBgn0021768	-1574	4
22	chrX	9608001	9608404	404	Peak_12758	105.371	1.35487	0.3299	4.00954e-05	0.00122442	chrX	9623680	9649831	Sp1	FBgn0020378	15277	1
	chrX	9608001	9608404	404	Peak_12758	105.371	1.35487	0.3299	4.00954e-05	0.00122442	chrX	9588218	9591591	btd	FBgn0000233	-16411	2
23	chr3R	21826554	21827410	857	Peak_10797	426.367	1.35153	0.315232	1.80772e-05	0.000675103	chr3R	21825572	21826483	E(spl)mgamma-HLH	FBgn0002735	-72	2
	chr3R	21826554	21827410	857	Peak_10797	426.367	1.35153	0.315232	1.80772e-05	0.000675103	chr3R	21823342	21824355	E(spl)mdelta-HLH	FBgn0002734	-2200	2
24	chr2L	12467593	12467955	363	Peak_1467	92.8671	1.34146	0.322608	3.2082e-05	0.00103778	chr2L	12455539	12546611	bun	FBgn0259176	0	3
	chr2L	12467593	12467955	363	Peak_1467	92.8671	1.34146	0.322608	3.2082e-05	0.00103778	chr2L	12460003	12460100	mir-967	FBgn0262203	-7494	1
25	chr2L	14890417	14890929	513	Peak_1767	135.011	1.34016	0.332119	5.45589e-05	0.00156122	chr2L	14882100	14883721	ProtB	FBgn0013301	-6697	1
	chr2L	14890417	14890929	513	Peak_1767	135.011	1.34016	0.332119	5.45589e-05	0.00156122	chr2L	14879049	14881652	ProtA	FBgn0013300	-8766	1
26	chr2R	16056003	16056408	406	Peak_4508	97.2527	1.3401	0.358267	0.00018366	0.00390992	chr2R	16033622	16034329	CG11041	FBgn0034481	-21675	3
	chr2R	16056003	16056408	406	Peak_4508	97.2527	1.3401	0.358267	0.00018366	0.00390992	chr2R	16099089	16100124	CG16894	FBgn0034483	42682	1
27	chrX	10702508	10703161	654	Peak_12871	354.459	1.33848	0.287269	3.17283e-06	0.000177188	chrX	10681901	10715850	Imp	FBgn0285926	0	4
	chrX	10702508	10703161	654	Peak_12871	354.459	1.33848	0.287269	3.17283e-06	0.000177188	chrX	10726784	10741125	sbr	FBgn0003321	23624	3
28	chr2L	704703	705204	502	Peak_136	153.576	1.32729	0.36294	0.000255137	0.00495415	chr2L	640012	714983	ds	FBgn0284247	0	3
	chr2L	704703	705204	502	Peak_136	153.576	1.32729	0.36294	0.000255137	0.00495415	chr2L	728361	730564	Hsp60B	FBgn0011244	23158	2
29	chrX	1513047	1516832	3786	Peak_11755	2692.1	1.32602	0.228683	6.69074e-09	1.27811e-06	chrX	1469164	1539195	br	FBgn0283451	0	1
	chrX	1513047	1516832	3786	Peak_11755	2692.1	1.32602	0.228683	6.69074e-09	1.27811e-06	chrX	1417586	1512188	Mur2B	FBgn0025390	-860	1
30	chr3R	21825143	21825696	554	Peak_10796	163.386	1.32596	0.319445	3.31291e-05	0.00105714	chr3R	21825572	21826483	E(spl)mgamma-HLH	FBgn0002735	0	2
	chr3R	21825143	21825696	554	Peak_10796	163.386	1.32596	0.319445	3.31291e-05	0.00105714	chr3R	21823342	21824355	E(spl)mdelta-HLH	FBgn0002734	-789	2
31	chr2R	17681789	17682331	543	Peak_4712	126.495	1.32496	0.342705	0.00011055	0.00272254	chr2R	17683899	17684446	CG34204	FBgn0085233	1569	1
	chr2R	17681789	17682331	543	Peak_4712	126.495	1.32496	0.342705	0.00011055	0.00272254	chr2R	17677127	17679085	Loxl2	FBgn0034660	-2705	1
32	chrX	18896127	18896429	303	Peak_13835	80.3486	1.3119	0.354738	0.000217108	0.00445433	chrX	18824367	18922662	CG43759	FBgn0264090	0	4
	chrX	18896127	18896429	303	Peak_13835	80.3486	1.3119	0.354738	0.000217108	0.00445433	chrX	18944474	18945008	Diedel3	FBgn0085358	48046	1
33	chr3L	16155236	16155554	319	Peak_7273	104.75	1.30993	0.326863	6.13464e-05	0.00171382	chr3L	16130901	16157801	CG5151	FBgn0036576	0	3
	chr3L	16155236	16155554	319	Peak_7273	104.75	1.30993	0.326863	6.13464e-05	0.00171382	chr3L	16162554	16163206	CG33796	FBgn0053796	7001	3
34	chr2L	1886449	1886674	226	Peak_258	71.2333	1.29911	0.324377	6.20365e-05	0.00172628	chr2L	1884621	1943461	Wdr62	FBgn0031374	0	2
	chr2L	1886449	1886674	226	Peak_258	71.2333	1.29911	0.324377	6.20365e-05	0.00172628	chr2L	1882007	1883185	CG15358	FBgn0031373	-3265	1
35	chrX	16674988	16675320	333	Peak_13535	109.902	1.29083	0.313038	3.73075e-05	0.00116163	chrX	16646221	16677467	if	FBgn0001250	0	1
	chrX	16674988	16675320	333	Peak_13535	109.902	1.29083	0.313038	3.73075e-05	0.00116163	chrX	16677965	16679125	mRpL22	FBgn0030786	2646	1
36	chrX	14881859	14882357	499	Peak_13312	145.054	1.28572	0.33547	0.000126799	0.00300892	chrX	14849509	14904022	eag	FBgn0000535	0	1
	chrX	14881859	14882357	499	Peak_13312	145.054	1.28572	0.33547	0.000126799	0.00300892	chrX	14904169	14957462	hiw	FBgn0030600	21813	1
37	chr3L	14610838	14611192	355	Peak_7081	105.947	1.26591	0.35912	0.000423416	0.00727266	chr3L	14607557	14615305	shd	FBgn0003388	0	1
	chr3L	14610838	14611192	355	Peak_7081	105.947	1.26591	0.35912	0.000423416	0.00727266	chr3L	14615895	14621083	CG9628	FBgn0036433	4704	1
38	chrX	8653251	8653790	540	Peak_12640	130.727	1.26589	0.346081	0.000254387	0.00494638	chrX	8650571	8679386	Lim1	FBgn0026411	0	3
	chrX	8653251	8653790	540	Peak_12640	130.727	1.26589	0.346081	0.000254387	0.00494638	chrX	8614552	8615536	CG1789	FBgn0030063	-37716	4
39	chr3L	3347604	3347999	396	Peak_5685	124.446	1.26287	0.331217	0.000137391	0.00321244	chr3L	3336859	3368133	kst	FBgn0004167	0	1
	chr3L	3347604	3347999	396	Peak_5685	124.446	1.26287	0.331217	0.000137391	0.00321244	chr3L	3336031	3336418	Drsl6	FBgn0052268	-11187	1
40	chr2R	13823077	13824798	1722	Peak_4200	441.747	1.25888	0.378285	0.000875138	0.0125721	chr2R	13761443	13814045	Elk	FBgn0011589	-9033	2
	chr2R	13823077	13824798	1722	Peak_4200	441.747	1.25888	0.378285	0.000875138	0.0125721	chr2R	13842900	13844075	PpY-55A	FBgn0003140	18103	2
41	chrX	10703563	10704657	1095	Peak_12872	385.522	1.25788	0.28671	1.14772e-05	0.000470266	chrX	10681901	10715850	Imp	FBgn0285926	0	4
	chrX	10703563	10704657	1095	Peak_12872	385.522	1.25788	0.28671	1.14772e-05	0.000470266	chrX	10726784	10741125	sbr	FBgn0003321	22128	3
42	chr2R	14098625	14098921	297	Peak_4227	79.757	1.25788	0.377928	0.000873621	0.0125721	chr2R	14095259	14096483	CG30114	FBgn0050114	-2143	2
	chr2R	14098625	14098921	297	Peak_4227	79.757	1.25788	0.377928	0.000873621	0.0125721	chr2R	14071886	14080356	CG33958	FBgn0053958	-18270	1
43	chr3L	13757066	13757390	325	Peak_6962	75.2509	1.25693	0.374693	0.000794906	0.0116323	chr3L	13830855	13831180	CG43184	FBgn0262813	73466	1
	chr3L	13757066	13757390	325	Peak_6962	75.2509	1.25693	0.374693	0.000794906	0.0116323	chr3L	13833296	13835340	CG8757	FBgn0036380	75907	1
44	chrX	14615571	14615944	374	Peak_13282	134.622	1.25441	0.320009	8.85718e-05	0.00225701	chrX	14580070	14643409	NetB	FBgn0015774	0	1
	chrX	14615571	14615944	374	Peak_13282	134.622	1.25441	0.320009	8.85718e-05	0.00225701	chrX	14612305	14612975	hog	FBgn0266710	-2597	1
45	chr3L	8484115	8484633	519	Peak_6278	188.83	1.24772	0.308266	5.17601e-05	0.00150552	chr3L	8465906	8500246	CG43163	FBgn0262719	0	1
	chr3L	8484115	8484633	519	Peak_6278	188.83	1.24772	0.308266	5.17601e-05	0.00150552	chr3L	8500568	8502863	ZC3H3	FBgn0035900	15936	1
46	chr3L	22137465	22138058	594	Peak_8080	231.679	1.24656	0.270859	4.17974e-06	0.000220466	chr3L	22129189	22240802	olf413	FBgn0037153	0	1
	chr3L	22137465	22138058	594	Peak_8080	231.679	1.24656	0.270859	4.17974e-06	0.000220466	chr3L	22075819	22076467	msopa	FBgn0004414	-60999	1
47	chr3R	4647394	4647797	404	Peak_8772	121.934	1.23938	0.336966	0.000235026	0.00468402	chr3R	4647729	4648560	CG8369	FBgn0040532	0	1
	chr3R	4647394	4647797	404	Peak_8772	121.934	1.23938	0.336966	0.000235026	0.00468402	chr3R	4648570	4649899	IscU	FBgn0037637	774	1
48	chr3L	18197133	18197843	711	Peak_7584	303.674	1.23114	0.238609	2.47422e-07	2.41211e-05	chr3L	18194593	18196737	CG7320	FBgn0036782	-397	3
	chr3L	18197133	18197843	711	Peak_7584	303.674	1.23114	0.238609	2.47422e-07	2.41211e-05	chr3L	18160844	18178741	hid	FBgn0003997	-18393	2
49	chr2L	5869715	5870149	435	Peak_697	132.512	1.22845	0.358075	0.000602009	0.00944506	chr2L	5859768	5879498	rau	FBgn0031745	0	1
	chr2L	5869715	5870149	435	Peak_697	132.512	1.22845	0.358075	0.000602009	0.00944506	chr2L	5824003	5856767	TrissinR	FBgn0085410	-12949	1
50	chr3R	16106017	16106843	827	Peak_10113	251.177	1.2271	0.309782	7.45837e-05	0.00197808	chr3R	16078491	16129664	cic	FBgn0262582	0	1
	chr3R	16106017	16106843	827	Peak_10113	251.177	1.2271	0.309782	7.45837e-05	0.00197808	chr3R	16129676	16130676	CG4367	FBgn0038783	22834	1
51	chr2R	18260597	18261045	449	Peak_4779	169.338	1.22641	0.269365	5.28931e-06	0.00026235	chr2R	18262594	18265989	Rtf1	FBgn0034722	1550	1
	chr2R	18260597	18261045	449	Peak_4779	169.338	1.22641	0.269365	5.28931e-06	0.00026235	chr2R	18267141	18270180	wrapper	FBgn0025878	6097	1
52	chr3R	2488481	2489188	708	Peak_8498	175.055	1.22152	0.285832	1.92376e-05	0.000701935	chr3R	2487148	2504312	lab	FBgn0002522	0	1
	chr3R	2488481	2489188	708	Peak_8498	175.055	1.22152	0.285832	1.92376e-05	0.000701935	chr3R	2484527	2485822	agt	FBgn0024912	-2660	1
53	chr2L	9192351	9192700	350	Peak_1124	87.5711	1.21932	0.340077	0.000336528	0.00609111	chr2L	9166777	9247186	tai	FBgn0041092	0	3
	chr2L	9192351	9192700	350	Peak_1124	87.5711	1.21932	0.340077	0.000336528	0.00609111	chr2L	9165420	9166514	CG9586	FBgn0032101	-25838	3
54	chrX	1994356	1994750	395	Peak_11826	95.1204	1.21845	0.340004	0.000338833	0.00612491	chrX	1988266	2007697	csw	FBgn0000382	0	2
	chrX	1994356	1994750	395	Peak_11826	95.1204	1.21845	0.340004	0.000338833	0.00612491	chrX	1995959	1996058	snoRNA:Me18S-C1024	FBgn0086043	1210	2
55	chr2L	1734173	1734548	376	Peak_253	99.1308	1.21809	0.355677	0.000615472	0.00960583	chr2L	1732523	1750612	CG17646	FBgn0264494	0	1
	chr2L	1734173	1734548	376	Peak_253	99.1308	1.21809	0.355677	0.000615472	0.00960583	chr2L	1731032	1732356	CG17652	FBgn0031361	-1818	1
56	chr3L	18218529	18218846	318	Peak_7595	87.9345	1.20054	0.363275	0.000950537	0.0134234	chr3L	18194593	18196737	CG7320	FBgn0036782	-21793	3
	chr3L	18218529	18218846	318	Peak_7595	87.9345	1.20054	0.363275	0.000950537	0.0134234	chr3L	18245187	18245946	CheA75a	FBgn0036783	26342	2
57	chr3L	18019728	18020016	289	Peak_7551	73.9667	1.19825	0.368367	0.00114241	0.0154833	chr3L	17944052	18057796	Eip75B	FBgn0000568	0	5
	chr3L	18019728	18020016	289	Peak_7551	73.9667	1.19825	0.368367	0.00114241	0.0154833	chr3L	18033416	18034838	CG32192	FBgn0052192	13401	1
58	chr3R	17959935	17960648	714	Peak_10359	367.214	1.19517	0.245552	1.13144e-06	7.91783e-05	chr3R	17959551	18121848	SKIP	FBgn0051163	0	1
	chr3R	17959935	17960648	714	Peak_10359	367.214	1.19517	0.245552	1.13144e-06	7.91783e-05	chr3R	17945782	17959089	CG42390	FBgn0259736	-847	1
59	chrX	87619	88574	956	Peak_11574	607.143	1.19497	0.314852	0.000147448	0.00334562	chrX	38594	96465	tyn	FBgn0284435	0	2
	chrX	87619	88574	956	Peak_11574	607.143	1.19497	0.314852	0.000147448	0.00334562	chrX	39117	44813	CG17707	FBgn0025835	-42807	2
60	chr3R	3274726	3275198	473	Peak_8621	138.08	1.19281	0.349922	0.000652522	0.00997195	chr3R	3277173	3277265	mir-4950	FBgn0263565	1976	2
	chr3R	3274726	3275198	473	Peak_8621	138.08	1.19281	0.349922	0.000652522	0.00997195	chr3R	3265481	3267698	CG14598	FBgn0037503	-7029	2
61	chrX	5916749	5917100	352	Peak_12306	96.547	1.19223	0.318302	0.000179976	0.003875	chrX	5902215	5907214	mab-21	FBgn0029003	-9536	2
	chrX	5916749	5917100	352	Peak_12306	96.547	1.19223	0.318302	0.000179976	0.003875	chrX	5929785	5931295	rux	FBgn0003302	12686	1
62	chr3R	9823185	9823873	689	Peak_9379	227.019	1.19151	0.318453	0.000182889	0.00390992	chr3R	9792782	9797522	rdx	FBgn0264493	-25664	1
	chr3R	9823185	9823873	689	Peak_9379	227.019	1.19151	0.318453	0.000182889	0.00390992	chr3R	9790606	9792797	Orc2	FBgn0015270	-30389	1
63	chr2L	7913148	7913865	718	Peak_962	228.299	1.19137	0.349336	0.000648734	0.00995711	chr2L	7891186	7984196	Snoo	FBgn0085450	0	1
	chr2L	7913148	7913865	718	Peak_962	228.299	1.19137	0.349336	0.000648734	0.00995711	chr2L	7889287	7890594	Spn28Db	FBgn0053121	-22555	1
64	chrX	18280101	18280504	404	Peak_13748	105.401	1.18954	0.337996	0.000432562	0.00738489	chrX	18281116	18284377	Tsf1	FBgn0022355	613	1
	chrX	18280101	18280504	404	Peak_13748	105.401	1.18954	0.337996	0.000432562	0.00738489	chrX	18275581	18279275	betaCOP	FBgn0008635	-827	1
65	chrX	12130571	12131137	567	Peak_13025	178.014	1.18681	0.240372	7.91734e-07	6.21775e-05	chrX	11937730	12226198	Ten-a	FBgn0267001	0	3
	chrX	12130571	12131137	567	Peak_13025	178.014	1.18681	0.240372	7.91734e-07	6.21775e-05	chrX	12128594	12129910	CG32655	FBgn0052655	-662	2
66	chr3R	21467061	21467614	554	Peak_10769	244.171	1.1831	0.277543	2.01924e-05	0.000730025	chr3R	21463564	21476119	jigr1	FBgn0039350	0	2
	chr3R	21467061	21467614	554	Peak_10769	244.171	1.1831	0.277543	2.01924e-05	0.000730025	chr3R	21472227	21472322	mir-92a	FBgn0262411	4614	2
67	chr2L	2861485	2861988	504	Peak_364	175.003	1.18066	0.3402	0.000519538	0.00848358	chr2L	2857163	2868548	CG2991	FBgn0031474	0	2
	chr2L	2861485	2861988	504	Peak_364	175.003	1.18066	0.3402	0.000519538	0.00848358	chr2L	2856069	2856705	RpS21	FBgn0015521	-4781	2
68	chrX	11404159	11404781	623	Peak_12937	246.771	1.18063	0.327347	0.00031015	0.00577156	chrX	11387167	11449078	Drak	FBgn0052666	0	1
	chrX	11404159	11404781	623	Peak_12937	246.771	1.18063	0.327347	0.00031015	0.00577156	chrX	11380578	11385606	CG33235	FBgn0030307	-18554	1
69	chr2R	10221551	10221959	409	Peak_3759	123.193	1.17725	0.299398	8.42164e-05	0.00216869	chr2R	10195646	10239307	Shroom	FBgn0085408	0	2
	chr2R	10221551	10221959	409	Peak_3759	123.193	1.17725	0.299398	8.42164e-05	0.00216869	chr2R	10239735	10243179	CG8613	FBgn0033924	17777	1
70	chr3R	6355263	6355658	396	Peak_9013	138.436	1.17546	0.283047	3.28344e-05	0.00105065	chr3R	6333282	6439998	hth	FBgn0001235	0	2
	chr3R	6355263	6355658	396	Peak_9013	138.436	1.17546	0.283047	3.28344e-05	0.00105065	chr3R	6338726	6338855	mir-4944	FBgn0263547	-16409	1
71	chrX	19666182	19666539	358	Peak_13953	131.608	1.17521	0.350795	0.000807687	0.0117949	chrX	19660497	19677581	zld	FBgn0259789	0	2
	chrX	19666182	19666539	358	Peak_13953	131.608	1.17521	0.350795	0.000807687	0.0117949	chrX	19653205	19658907	CG12702	FBgn0031070	-7276	2
72	chr3L	13052625	13053416	792	Peak_6901	319.717	1.17393	0.307947	0.00013778	0.00321244	chr3L	13053621	13054494	CG14115	FBgn0036343	206	1
	chr3L	13052625	13053416	792	Peak_6901	319.717	1.17393	0.307947	0.00013778	0.00321244	chr3L	13054978	13055787	CG34428	FBgn0085457	1563	1
73	chr3L	4119041	4119373	333	Peak_5787	122.667	1.17282	0.258996	5.94524e-06	0.000287815	chr3L	4114288	4115752	Chd64	FBgn0035499	-3290	1
	chr3L	4119041	4119373	333	Peak_5787	122.667	1.17282	0.258996	5.94524e-06	0.000287815	chr3L	4122906	4134550	ens	FBgn0264693	3534	1
74	chr3L	3250211	3250785	575	Peak_5664	271.313	1.17111	0.260514	6.94426e-06	0.000327214	chr3L	3251021	3251118	mir-282	FBgn0262368	237	1
	chr3L	3250211	3250785	575	Peak_5664	271.313	1.17111	0.260514	6.94426e-06	0.000327214	chr3L	3248014	3249044	CG43389	FBgn0263246	-1168	1
75	chr2L	7324784	7325243	460	Peak_887	105.988	1.1701	0.361688	0.00121592	0.0161241	chr2L	7333713	7352524	Wnt6	FBgn0031902	8471	2	BRV118 (1 of 2)
	chr2L	7324784	7325243	460	Peak_887	105.988	1.1701	0.361688	0.00121592	0.0161241	chr2L	7307158	7316265	wg	FBgn0284084	-8520	2
76	chrX	7409417	7409803	387	Peak_12483	114.973	1.16619	0.357811	0.00111709	0.0152277	chrX	7402683	7442025	CG32719	FBgn0052719	0	1
	chrX	7409417	7409803	387	Peak_12483	114.973	1.16619	0.357811	0.00111709	0.0152277	chrX	7422336	7422829	CG43138	FBgn0262612	12534	1
77	chrX	1000218	1000577	360	Peak_11681	85.9248	1.16607	0.349014	0.000834674	0.0121513	chrX	967073	1028929	CG3655	FBgn0040397	0	2
	chrX	1000218	1000577	360	Peak_11681	85.9248	1.16607	0.349014	0.000834674	0.0121513	chrX	1039676	1040165	CG14628	FBgn0040365	39100	2
78	chr3L	11118701	11119129	429	Peak_6622	120.966	1.16269	0.255042	5.14401e-06	0.000257857	chr3L	11116447	11127763	NaPi-III	FBgn0260795	0	1
	chr3L	11118701	11119129	429	Peak_6622	120.966	1.16269	0.255042	5.14401e-06	0.000257857	chr3L	11115065	11116316	Ufd1-like	FBgn0036136	-2386	1
79	chr3R	9877184	9877745	562	Peak_9394	241.961	1.16224	0.325593	0.000357496	0.00633278	chr3R	9882666	9913700	foxo	FBgn0038197	4922	1
	chr3R	9877184	9877745	562	Peak_9394	241.961	1.16224	0.325593	0.000357496	0.00633278	chr3R	9860739	9862120	CG9922	FBgn0038196	-15065	1
80	chr3R	857549	858088	540	Peak_8305	221.708	1.16179	0.258677	7.08001e-06	0.000331401	chr3R	812221	836753	plh	FBgn0037292	-20797	3
	chr3R	857549	858088	540	Peak_8305	221.708	1.16179	0.258677	7.08001e-06	0.000331401	chr3R	903500	912794	corto	FBgn0010313	45413	4
81	chr3L	16013886	16014479	594	Peak_7247	131.989	1.16085	0.331591	0.000463783	0.00780481	chr3L	16016579	16025852	Notum	FBgn0044028	2101	1
	chr3L	16013886	16014479	594	Peak_7247	131.989	1.16085	0.331591	0.000463783	0.00780481	chr3L	16024288	16024391	mir-4941	FBgn0263570	9810	1
82	chrX	1165618	1166067	450	Peak_11710	151.547	1.1607	0.261766	9.24468e-06	0.000398423	chrX	1136772	1169317	Atf3	FBgn0028550	0	4
	chrX	1165618	1166067	450	Peak_11710	151.547	1.1607	0.261766	9.24468e-06	0.000398423	chrX	1181322	1182978	CG32812	FBgn0025642	15256	3
83	chr2L	622115	622766	652	Peak_115	240.854	1.15814	0.268938	1.65977e-05	0.000632585	chr2L	620297	621201	lectin-21Cb	FBgn0040106	-915	1
	chr2L	622115	622766	652	Peak_115	240.854	1.15814	0.268938	1.65977e-05	0.000632585	chr2L	624616	625556	lectin-21Ca	FBgn0040107	1851	1
84	chr2L	3555207	3556739	1533	Peak_442	530.581	1.15368	0.262015	1.06706e-05	0.000444955	chr2L	3539246	3548423	drm	FBgn0024244	-6785	1
	chr2L	3555207	3556739	1533	Peak_442	530.581	1.15368	0.262015	1.06706e-05	0.000444955	chr2L	3576209	3576623	CG43815	FBgn0264363	19471	1
85	chr3R	5703158	5703740	583	Peak_8931	179.147	1.14966	0.328608	0.000467753	0.00786226	chr3R	5700402	5814598	Glut4EF	FBgn0267336	0	3
	chr3R	5703158	5703740	583	Peak_8931	179.147	1.14966	0.328608	0.000467753	0.00786226	chr3R	5651802	5693842	Teh1	FBgn0037766	-9317	2
86	chr2R	7794341	7794603	263	Peak_3438	63.9767	1.14818	0.354414	0.00119674	0.0159467	chr2R	7791827	7800284	reb	FBgn0033667	0	3
	chr2R	7794341	7794603	263	Peak_3438	63.9767	1.14818	0.354414	0.00119674	0.0159467	chr2R	7783501	7791423	MCPH1	FBgn0260959	-2919	1
87	chr3L	16150496	16151890	1395	Peak_7271	743.384	1.14592	0.303779	0.000161811	0.00356843	chr3L	16130901	16157801	CG5151	FBgn0036576	0	3
	chr3L	16150496	16151890	1395	Peak_7271	743.384	1.14592	0.303779	0.000161811	0.00356843	chr3L	16162554	16163206	CG33796	FBgn0053796	10665	3
88	chr3L	18198471	18199442	972	Peak_7585	346.859	1.14251	0.238617	1.68396e-06	0.000108696	chr3L	18194593	18196737	CG7320	FBgn0036782	-1735	3
	chr3L	18198471	18199442	972	Peak_7585	346.859	1.14251	0.238617	1.68396e-06	0.000108696	chr3L	18160844	18178741	hid	FBgn0003997	-19731	2
89	chrX	13266259	13266663	405	Peak_13152	153.807	1.14218	0.302573	0.000160083	0.00354542	chrX	13264638	13274193	CG1640	FBgn0030478	0	1
	chrX	13266259	13266663	405	Peak_13152	153.807	1.14218	0.302573	0.000160083	0.00354542	chrX	13262223	13264505	dmrt11E	FBgn0030477	-1755	1
90	chrX	2830414	2830791	378	Peak_11939	119.377	1.12095	0.304336	0.000230253	0.00463656	chrX	2634416	3026824	kirre	FBgn0028369	0	5
	chrX	2830414	2830791	378	Peak_11939	119.377	1.12095	0.304336	0.000230253	0.00463656	chrX	2831059	2832106	CG3598	FBgn0025645	269	1
91	chr3L	7732547	7732773	227	Peak_6173	63.7082	1.1167	0.363848	0.00214685	0.02407	chr3L	7643647	7752223	CG32373	FBgn0261788	0	1
	chr3L	7732547	7732773	227	Peak_6173	63.7082	1.1167	0.363848	0.00214685	0.02407	chr3L	7726349	7735785	Snmp2	FBgn0035815	0	1
92	chr3L	12094743	12095272	530	Peak_6759	277.498	1.11594	0.266856	2.89214e-05	0.000971101	chr3L	12081725	12082325	CG17154	FBgn0036246	-12419	1
	chr3L	12094743	12095272	530	Peak_6759	277.498	1.11594	0.266856	2.89214e-05	0.000971101	chr3L	12109200	12111155	vers	FBgn0011335	13929	1
93	chr3L	21763479	21763866	388	Peak_8034	115.861	1.11295	0.319062	0.000486314	0.00804981	chr3L	21738458	21763634	Syn1	FBgn0037130	0	1
	chr3L	21763479	21763866	388	Peak_8034	115.861	1.11295	0.319062	0.000486314	0.00804981	chr3L	21762914	21764421	CG7370	FBgn0037133	0	2
94	chrX	18804460	18804865	406	Peak_13813	125.913	1.11267	0.348688	0.00141777	0.0181373	chrX	18794442	18804091	CG7378	FBgn0030976	-370	4
	chrX	18804460	18804865	406	Peak_13813	125.913	1.11267	0.348688	0.00141777	0.0181373	chrX	18788478	18790614	SdhBL	FBgn0030975	-13847	1
95	chr2L	21871563	21872123	561	Peak_2458	164.641	1.10888	0.289385	0.000127183	0.00301054	chr2L	21896665	21898289	CG11629	FBgn0032965	24543	2
	chr2L	21871563	21872123	561	Peak_2458	164.641	1.10888	0.289385	0.000127183	0.00301054	chr2L	21902992	21903739	CG1421	FBgn0032966	30870	2
96	chrX	17452556	17453040	485	Peak_13633	166.966	1.10393	0.303327	0.00027326	0.00520473	chrX	17460584	17463261	ppk23	FBgn0030844	7545	2
	chrX	17452556	17453040	485	Peak_13633	166.966	1.10393	0.303327	0.00027326	0.00520473	chrX	17465886	17473262	Ankle2	FBgn0028343	12847	1
97	chrX	13852697	13852981	285	Peak_13222	130.076	1.10378	0.335973	0.0010187	0.0141596	chrX	13740148	13880475	mamo	FBgn0267033	0	2
	chrX	13852697	13852981	285	Peak_13222	130.076	1.10378	0.335973	0.0010187	0.0141596	chrX	13849268	13850607	CG11068	FBgn0030536	-2091	1
98	chr3L	18750108	18750734	627	Peak_7631	332.456	1.10284	0.331427	0.00087612	0.0125734	chr3L	18743706	18758844	ftz-f1	FBgn0001078	0	1
	chr3L	18750108	18750734	627	Peak_7631	332.456	1.10284	0.331427	0.00087612	0.0125734	chr3L	18741786	18743583	Atg3	FBgn0036813	-6526	1
99	chrX	9534737	9535581	845	Peak_12747	320.901	1.10243	0.279045	7.7911e-05	0.00203577	chrX	9520326	9534657	Ptpmeg2	FBgn0028341	-81	1
	chrX	9534737	9535581	845	Peak_12747	320.901	1.10243	0.279045	7.7911e-05	0.00203577	chrX	9553127	9556936	CG3106	FBgn0030148	17547	1
100	chr3R	9047885	9048527	643	Peak_9273	278.408	1.10012	0.290273	0.000150677	0.00339795	chr3R	9048672	9084499	Ace	FBgn0000024	146	1
	chr3R	9047885	9048527	643	Peak_9273	278.408	1.10012	0.290273	0.000150677	0.00339795	chr3R	9045365	9046300	CG8476	FBgn0038127	-1586	1
101	chrX	3710704	3710994	291	Peak_12071	84.9008	1.09798	0.371556	0.00312595	0.0311186	chrX	3705730	3751654	ec	FBgn0000542	0	1
	chrX	3710704	3710994	291	Peak_12071	84.9008	1.09798	0.371556	0.00312595	0.0311186	chrX	3696348	3705073	fd3F	FBgn0264954	-5632	1
102	chrX	16144879	16145211	333	Peak_13460	113.932	1.0968	0.324332	0.00072032	0.0107523	chrX	16148040	16148150	snRNA:U5:14B	FBgn0003933	2830	1
	chrX	16144879	16145211	333	Peak_13460	113.932	1.0968	0.324332	0.00072032	0.0107523	chrX	16148704	16148896	snRNA:U2:14B	FBgn0003920	3494	1
103	chr3R	10394284	10394885	602	Peak_9459	193.625	1.0941	0.269944	5.05486e-05	0.00147635	chr3R	10393332	10394569	CG8066	FBgn0038243	0	1
	chr3R	10394284	10394885	602	Peak_9459	193.625	1.0941	0.269944	5.05486e-05	0.00147635	chr3R	10394824	10395366	Cys	FBgn0004629	0	1
104	chr3R	2766559	2767896	1338	Peak_8542	892.93	1.09262	0.36629	0.00285492	0.0292896	chr3R	2721974	2824950	Antp	FBgn0260642	0	3
	chr3R	2766559	2767896	1338	Peak_8542	892.93	1.09262	0.36629	0.00285492	0.0292896	chr3R	2690045	2691966	ftz	FBgn0001077	-74594	2
105	chrX	6600744	6601210	467	Peak_12386	175.566	1.09226	0.291626	0.000180098	0.003875	chrX	6593540	6613422	CG14441	FBgn0029895	0	2
	chrX	6600744	6601210	467	Peak_12386	175.566	1.09226	0.291626	0.000180098	0.003875	chrX	6589898	6592536	CG14440	FBgn0029894	-8209	2
106	chr3L	7564095	7564613	519	Peak_6154	287.601	1.09221	0.301836	0.000296259	0.00556904	chr3L	7555709	7562599	frac	FBgn0035798	-1497	1
	chr3L	7564095	7564613	519	Peak_6154	287.601	1.09221	0.301836	0.000296259	0.00556904	chr3L	7548879	7553137	CG14837	FBgn0035797	-10959	1
107	chrX	13785887	13786638	752	Peak_13215	301.766	1.09167	0.278865	9.05251e-05	0.0022892	chrX	13740148	13880475	mamo	FBgn0267033	0	2
	chrX	13785887	13786638	752	Peak_13215	301.766	1.09167	0.278865	9.05251e-05	0.0022892	chrX	13724773	13739899	AMPdeam	FBgn0052626	-45989	1
108	chr3L	10354134	10354541	408	Peak_6481	84.2592	1.07943	0.362017	0.00286646	0.0293413	chr3L	10358327	10358425	mir-276a	FBgn0266076	3787	1
	chr3L	10354134	10354541	408	Peak_6481	84.2592	1.07943	0.362017	0.00286646	0.0293413	chr3L	10312884	10312983	mir-276b	FBgn0262381	-41152	2
109	chr3L	18249778	18250298	521	Peak_7606	107.784	1.07623	0.369451	0.00357926	0.0341637	chr3L	18245187	18245946	CheA75a	FBgn0036783	-3833	2
	chr3L	18249778	18250298	521	Peak_7606	107.784	1.07623	0.369451	0.00357926	0.0341637	chr3L	18285224	18287362	CG5103	FBgn0036784	34927	1
110	chr3R	20374543	20374931	389	Peak_10637	113.475	1.07382	0.3306	0.00116175	0.0156404	chr3R	20370440	20382271	Esyt2	FBgn0266758	0	2
	chr3R	20374543	20374931	389	Peak_10637	113.475	1.07382	0.3306	0.00116175	0.0156404	chr3R	20361925	20369147	CG5789	FBgn0039207	-5397	1
111	chr3R	27515868	27516452	585	Peak_11411	241.671	1.07163	0.284171	0.000162542	0.00357339	chr3R	27503868	27505602	CG11550	FBgn0039864	-10267	1
	chr3R	27515868	27516452	585	Peak_11411	241.671	1.07163	0.284171	0.000162542	0.00357339	chr3R	27495186	27503693	CG1815	FBgn0039863	-12176	1
112	chr2L	3784239	3784584	346	Peak_478	83.9783	1.07088	0.362093	0.00310176	0.0308996	chr2L	3771699	3784121	bowl	FBgn0004893	-119	1
	chr2L	3784239	3784584	346	Peak_478	83.9783	1.07088	0.362093	0.00310176	0.0308996	chr2L	3784946	3785622	CG31960	FBgn0051960	363	1
113	chr3R	18378462	18379237	776	Peak_10412	183.572	1.06929	0.293734	0.00027228	0.00519427	chr3R	18376401	18382216	bond	FBgn0260942	0	1
	chr3R	18378462	18379237	776	Peak_10412	183.572	1.06929	0.293734	0.00027228	0.00519427	chr3R	18384063	18388294	sit	FBgn0038986	4827	1
114	chr3R	18619689	18620062	374	Peak_10435	103.646	1.06231	0.308969	0.000585514	0.00923055	chr3R	18576622	18619752	CG7029	FBgn0039026	0	1
	chr3R	18619689	18620062	374	Peak_10435	103.646	1.06231	0.308969	0.000585514	0.00923055	chr3R	18630012	18633012	CG7031	FBgn0039027	9951	1
115	chrX	839864	840280	417	Peak_11660	119.911	1.05988	0.328906	0.00127103	0.0167411	chrX	836506	839806	CG3703	FBgn0040348	-59	1
	chrX	839864	840280	417	Peak_11660	119.911	1.05988	0.328906	0.00127103	0.0167411	chrX	840694	841533	CG3699	FBgn0040349	415	1
116	chr2L	10321545	10321936	392	Peak_1250	134.221	1.05813	0.313301	0.000731838	0.0109012	chr2L	10317496	10321802	CG5381	FBgn0032218	0	1
	chr2L	10321545	10321936	392	Peak_1250	134.221	1.05813	0.313301	0.000731838	0.0109012	chr2L	10322475	10324990	CG4995	FBgn0032219	540	1
117	chr2L	11403832	11404109	278	Peak_1388	81.1059	1.05643	0.352105	0.0026968	0.0280722	chr2L	11358872	11373636	salr	FBgn0000287	-30197	1
	chr2L	11403832	11404109	278	Peak_1388	81.1059	1.05643	0.352105	0.0026968	0.0280722	chr2L	11434310	11445614	salm	FBgn0261648	30202	2
118	chr3L	20627686	20627899	214	Peak_7871	35.7908	1.05336	0.387008	0.00649275	0.0522284	chr3L	20630298	20634010	CG13251	FBgn0037014	2400	2
	chr3L	20627686	20627899	214	Peak_7871	35.7908	1.05336	0.387008	0.00649275	0.0522284	chr3L	20590240	20613759	knrl	FBgn0001323	-13928	2
119	chr2R	19461853	19462261	409	Peak_4932	152.959	1.04796	0.372978	0.00495865	0.0433491	chr2R	19452413	19487049	apt	FBgn0015903	0	5
	chr2R	19461853	19462261	409	Peak_4932	152.959	1.04796	0.372978	0.00495865	0.0433491	chr2R	19451495	19452303	CG30184	FBgn0050184	-9551	3
120	chr2L	2929801	2931046	1246	Peak_376	251.934	1.04749	0.297547	0.000430878	0.00736978	chr2L	2885928	2952511	lilli	FBgn0041111	0	3
	chr2L	2929801	2931046	1246	Peak_376	251.934	1.04749	0.297547	0.000430878	0.00736978	chr2L	2954761	2964851	Rbp9	FBgn0010263	23716	2
121	chrX	5436847	5437369	523	Peak_12238	159.562	1.04625	0.259916	5.68981e-05	0.00160862	chrX	5422959	5454216	Vsx2	FBgn0263512	0	1
	chrX	5436847	5437369	523	Peak_12238	159.562	1.04625	0.259916	5.68981e-05	0.00160862	chrX	5418334	5418498	snoRNA:Psi28S-3342	FBgn0086667	-18350	1
122	chr3L	17951206	17951672	467	Peak_7525	141.43	1.04606	0.342043	0.00222611	0.0246039	chr3L	17944052	18057796	Eip75B	FBgn0000568	0	5
	chr3L	17951206	17951672	467	Peak_7525	141.43	1.04606	0.342043	0.00222611	0.0246039	chr3L	17996077	17996178	snoRNA:Me28S-A30	FBgn0086081	44406	2
123	chr2L	11206785	11207193	409	Peak_1353	153.599	1.0451	0.263155	7.14506e-05	0.00192753	chr2L	11210677	11260808	ab	FBgn0264442	3485	2
	chr2L	11206785	11207193	409	Peak_1353	153.599	1.0451	0.263155	7.14506e-05	0.00192753	chr2L	11179031	11180231	CG4788	FBgn0032354	-26555	1
124	chr3R	26133254	26134523	1270	Peak_11263	288.568	1.04388	0.274892	0.000146212	0.00332291	chr3R	26131529	26132362	CG34300	FBgn0085329	-893	2
	chr3R	26133254	26134523	1270	Peak_11263	288.568	1.04388	0.274892	0.000146212	0.00332291	chr3R	26078903	26079819	CG18404	FBgn0039761	-53436	2
125	chr3L	17942189	17942843	655	Peak_7524	188.86	1.04284	0.302651	0.000569592	0.00904311	chr3L	17944052	18057796	Eip75B	FBgn0000568	1210	5
	chr3L	17942189	17942843	655	Peak_7524	188.86	1.04284	0.302651	0.000569592	0.00904311	chr3L	17902582	17905665	CG5290	FBgn0036772	-36525	1
126	chr2L	7324124	7324664	541	Peak_886	157.216	1.04181	0.331131	0.00165394	0.0200344	chr2L	7307158	7316265	wg	FBgn0284084	-7860	2	BRV118 (2 of 2)
	chr2L	7324124	7324664	541	Peak_886	157.216	1.04181	0.331131	0.00165394	0.0200344	chr2L	7333713	7352524	Wnt6	FBgn0031902	9050	2
127	chrX	4914972	4915827	856	Peak_12202	320.016	1.04171	0.318118	0.00105808	0.01462	chrX	4891473	4892270	CG12680	FBgn0029740	-22703	2
	chrX	4914972	4915827	856	Peak_12202	320.016	1.04171	0.318118	0.00105808	0.01462	chrX	4942305	4964962	ovo	FBgn0003028	26479	2
128	chrX	8670666	8671433	768	Peak_12642	182.574	1.04119	0.330863	0.00165012	0.0200145	chrX	8650571	8679386	Lim1	FBgn0026411	0	3
	chrX	8670666	8671433	768	Peak_12642	182.574	1.04119	0.330863	0.00165012	0.0200145	chrX	8614552	8615536	CG1789	FBgn0030063	-55131	4
129	chrX	17205000	17205359	360	Peak_13599	116.552	1.03908	0.341635	0.00235408	0.0256176	chrX	17208613	17218208	B-H2	FBgn0004854	3255	1
	chrX	17205000	17205359	360	Peak_13599	116.552	1.03908	0.341635	0.00235408	0.0256176	chrX	17176528	17199508	CG5445	FBgn0030838	-5493	1
130	chr3R	17244947	17245700	754	Peak_10245	385.152	1.03832	0.290147	0.000345424	0.00619564	chr3R	17235700	17259855	lbl	FBgn0008651	0	3
	chr3R	17244947	17245700	754	Peak_10245	385.152	1.03832	0.290147	0.000345424	0.00619564	chr3R	17234844	17235646	CheB93b	FBgn0051438	-9302	2
131	chr3L	1590220	1590683	464	Peak_5458	100.177	1.03767	0.28796	0.000313951	0.00580891	chr3L	1576698	1600320	CG13917	FBgn0035237	0	1
	chr3L	1590220	1590683	464	Peak_5458	100.177	1.03767	0.28796	0.000313951	0.00580891	chr3L	1600725	1602674	CG12104	FBgn0035238	10043	1
132	chrX	11271956	11272522	567	Peak_12922	268.307	1.03651	0.332479	0.00182372	0.0215268	chrX	11263697	11303809	dlg1	FBgn0001624	0	1
	chrX	11271956	11272522	567	Peak_12922	268.307	1.03651	0.332479	0.00182372	0.0215268	chrX	11262477	11263216	Tim8	FBgn0027359	-8741	1
133	chr3R	10308679	10309254	576	Peak_9453	245.098	1.03372	0.347672	0.00294663	0.0297716	chr3R	10217404	10307435	cv-c	FBgn0285955	-1245	1
	chr3R	10308679	10309254	576	Peak_9453	245.098	1.03372	0.347672	0.00294663	0.0297716	chr3R	10334770	10337434	HtrA2	FBgn0038233	25517	1
134	chrX	1135930	1136912	983	Peak_11701	307.618	1.03168	0.324583	0.00148058	0.018604	chrX	1136772	1169317	Atf3	FBgn0028550	0	4
	chrX	1135930	1136912	983	Peak_11701	307.618	1.03168	0.324583	0.00148058	0.018604	chrX	1130905	1133917	CG11403	FBgn0026876	-2014	2
135	chr3R	5703859	5704112	254	Peak_8932	123.065	1.02954	0.323311	0.00145071	0.018404	chr3R	5700402	5814598	Glut4EF	FBgn0267336	0	3
	chr3R	5703859	5704112	254	Peak_8932	123.065	1.02954	0.323311	0.00145071	0.018404	chr3R	5651802	5693842	Teh1	FBgn0037766	-10018	2
136	chr2R	16959488	16961450	1963	Peak_4606	736.813	1.02938	0.160455	1.40455e-10	5.22494e-08	chr2R	16957872	16960294	CG10527	FBgn0034583	0	1
	chr2R	16959488	16961450	1963	Peak_4606	736.813	1.02938	0.160455	1.40455e-10	5.22494e-08	chr2R	16961522	16976450	Treh	FBgn0003748	73	1
137	chr3R	12939522	12939819	298	Peak_9804	95.6919	1.02833	0.254736	5.41745e-05	0.00155653	chr3R	12917254	12944804	cher	FBgn0014141	0	1
	chr3R	12939522	12939819	298	Peak_9804	95.6919	1.02833	0.254736	5.41745e-05	0.00155653	chr3R	12946186	12946530	CG34278	FBgn0085307	6368	1
138	chrX	11341475	11342311	837	Peak_12927	282.949	1.02653	0.278277	0.000225243	0.00456165	chrX	11324555	11348371	Evi5	FBgn0262740	0	2
	chrX	11341475	11342311	837	Peak_12927	282.949	1.02653	0.278277	0.000225243	0.00456165	chrX	11336571	11340045	Sk1	FBgn0030300	-1431	1
139	chrX	3760220	3760677	458	Peak_12083	158.61	1.02371	0.334681	0.00222264	0.0245847	chrX	3756998	3762364	yin	FBgn0265575	0	1
	chrX	3760220	3760677	458	Peak_12083	158.61	1.02371	0.334681	0.00222264	0.0245847	chrX	3763005	3772850	CG2930	FBgn0028491	2329	1
140	chrX	4388774	4389278	505	Peak_12150	257.649	1.02237	0.31264	0.00107505	0.0147686	chrX	4306888	4378485	bi	FBgn0000179	-10290	3
	chrX	4388774	4389278	505	Peak_12150	257.649	1.02237	0.31264	0.00107505	0.0147686	chrX	4424263	4427873	CG3556	FBgn0029708	34986	2
141	chrX	2431537	2431828	292	Peak_11898	99.3536	1.02077	0.322445	0.00154697	0.0191825	chrX	2364492	2439443	trol	FBgn0284408	0	2
	chrX	2431537	2431828	292	Peak_11898	99.3536	1.02077	0.322445	0.00154697	0.0191825	chrX	2438772	2438941	mir-4955	FBgn0263531	6945	2
142	chr3R	3995846	3996289	444	Peak_8687	143.603	1.0203	0.274871	0.000205699	0.00427612	chr3R	3973089	4007166	grn	FBgn0001138	0	2
	chr3R	3995846	3996289	444	Peak_8687	143.603	1.0203	0.274871	0.000205699	0.00427612	chr3R	4029916	4030552	CheA84a	FBgn0261290	33628	3
143	chr3R	3264585	3264856	272	Peak_8619	119.841	1.01904	0.308048	0.000939504	0.0132941	chr3R	3265481	3267698	CG14598	FBgn0037503	626	2
	chr3R	3264585	3264856	272	Peak_8619	119.841	1.01904	0.308048	0.000939504	0.0132941	chr3R	3277173	3277265	mir-4950	FBgn0263565	12318	2
144	chrX	1154229	1154776	548	Peak_11706	147.359	1.0178	0.288642	0.000421629	0.00726848	chrX	1136772	1169317	Atf3	FBgn0028550	0	4
	chrX	1154229	1154776	548	Peak_11706	147.359	1.0178	0.288642	0.000421629	0.00726848	chrX	1130905	1133917	CG11403	FBgn0026876	-20313	2
145	chr2L	12600654	12601094	441	Peak_1491	114.324	1.01695	0.319928	0.00147951	0.018604	chr2L	12587624	12628135	nub	FBgn0085424	0	1
	chr2L	12600654	12601094	441	Peak_1491	114.324	1.01695	0.319928	0.00147951	0.018604	chr2L	12610516	12646356	Ref2	FBgn0032439	9423	1
146	chr3L	14329133	14330063	931	Peak_7034	389.467	1.01691	0.265967	0.000131606	0.00309032	chr3L	14267442	14361739	fz	FBgn0001085	0	2
	chr3L	14329133	14330063	931	Peak_7034	389.467	1.01691	0.265967	0.000131606	0.00309032	chr3L	14322445	14322985	CG13482	FBgn0036419	-6149	2
147	chr3L	16471854	16472121	268	Peak_7328	89.817	1.01607	0.361936	0.00499572	0.0435923	chr3L	16412696	16489660	CG33158	FBgn0053158	0	2
	chr3L	16471854	16472121	268	Peak_7328	89.817	1.01607	0.361936	0.00499572	0.0435923	chr3L	16463485	16476750	aos	FBgn0004569	0	2
148	chr2R	11552426	11552846	421	Peak_3921	126.083	1.01405	0.340683	0.00291546	0.0295858	chr2R	11544822	11563458	fus	FBgn0023441	0	2
	chr2R	11552426	11552846	421	Peak_3921	126.083	1.01405	0.340683	0.00291546	0.0295858	chr2R	11544570	11544668	mir-278	FBgn0262403	-7759	2
149	chrX	11534356	11534772	417	Peak_12962	221.335	1.01362	0.350472	0.00382598	0.0359363	chrX	11516047	11571371	Ptp10D	FBgn0004370	0	2
	chrX	11534356	11534772	417	Peak_12962	221.335	1.01362	0.350472	0.00382598	0.0359363	chrX	11510156	11513981	Met	FBgn0002723	-20376	3
150	chr3L	7614608	7615467	860	Peak_6165	260.358	1.0115	0.280857	0.00031642	0.00584694	chr3L	7586190	7632673	Pura	FBgn0035802	0	2
	chr3L	7614608	7615467	860	Peak_6165	260.358	1.0115	0.280857	0.00031642	0.00584694	chr3L	7632816	7632894	snoRNA:Me18S-A1806	FBgn0086074	17350	1
151	chrX	9026302	9027117	816	Peak_12691	410.713	1.00974	0.326296	0.00197106	0.0226528	chrX	9016005	9029132	fend	FBgn0030090	0	1
	chrX	9026302	9027117	816	Peak_12691	410.713	1.00974	0.326296	0.00197106	0.0226528	chrX	9036525	9041927	CG7065	FBgn0030091	9409	1
152	chr2R	4542092	4542392	301	Peak_2959	111.516	1.00886	0.312049	0.00122491	0.0162196	chr2R	4537153	4552728	ptc	FBgn0003892	0	3
	chr2R	4542092	4542392	301	Peak_2959	111.516	1.00886	0.312049	0.00122491	0.0162196	chr2R	4553317	4570527	Acsl	FBgn0263120	10926	3
153	chr2L	16450897	16451430	534	Peak_1886	216.78	1.00855	0.295697	0.000647864	0.00995711	chr2L	16450906	16453042	Idgf3	FBgn0020414	0	1
	chr2L	16450897	16451430	534	Peak_1886	216.78	1.00855	0.295697	0.000647864	0.00995711	chr2L	16447329	16450508	Idgf2	FBgn0020415	-390	1
154	chr3R	9849925	9851369	1445	Peak_9388	796.67	1.00782	0.283102	0.000370982	0.00652264	chr3R	9854949	9857205	Cyp6d5	FBgn0038194	3581	4
	chr3R	9849925	9851369	1445	Peak_9388	796.67	1.00782	0.283102	0.000370982	0.00652264	chr3R	9858092	9860763	CG3061	FBgn0038195	6724	4
155	chr3R	15221266	15221558	293	Peak_10051	86.1946	1.00766	0.334493	0.00259107	0.0273542	chr3R	15194716	15228875	Ino80	FBgn0086613	0	1
	chr3R	15221266	15221558	293	Peak_10051	86.1946	1.00766	0.334493	0.00259107	0.0273542	chr3R	15219081	15220910	CG3739	FBgn0038702	-357	1
156	chrX	8658449	8658969	521	Peak_12641	180.575	1.00507	0.282241	0.000369399	0.00650289	chrX	8650571	8679386	Lim1	FBgn0026411	0	3
	chrX	8658449	8658969	521	Peak_12641	180.575	1.00507	0.282241	0.000369399	0.00650289	chrX	8614552	8615536	CG1789	FBgn0030063	-42914	4
157	chr3R	14275856	14276432	577	Peak_9923	446.804	1.00306	0.185265	6.15655e-08	7.85229e-06	chr3R	14239994	14371308	fru	FBgn0004652	0	8
	chr3R	14275856	14276432	577	Peak_9923	446.804	1.00306	0.185265	6.15655e-08	7.85229e-06	chr3R	14235801	14237353	CG10864	FBgn0038621	-38504	8
158	chr3R	12101760	12102191	432	Peak_9684	196.324	1.00168	0.294466	0.000669735	0.0101909	chr3R	12098173	12128094	gish	FBgn0250823	0	2
	chr3R	12101760	12102191	432	Peak_9684	196.324	1.00168	0.294466	0.000669735	0.0101909	chr3R	12094050	12098137	Mat89Ba	FBgn0261286	-3624	2
159	chr3R	923759	924435	677	Peak_8322	221.76	0.997316	0.261982	0.00014077	0.00325426	chr3R	934399	934900	CG43131	FBgn0262605	9965	1
	chr3R	923759	924435	677	Peak_8322	221.76	0.997316	0.261982	0.00014077	0.00325426	chr3R	903500	912794	corto	FBgn0010313	-10966	4
160	chr3R	12048906	12049566	661	Peak_9661	382.675	0.994828	0.304739	0.00109646	0.0149674	chr3R	12051372	12086051	tara	FBgn0040071	1807	6
	chr3R	12048906	12049566	661	Peak_9661	382.675	0.994828	0.304739	0.00109646	0.0149674	chr3R	12029915	12030972	mtSSB	FBgn0010438	-17935	6
161	chrX	2148102	2148494	393	Peak_11850	142.697	0.994427	0.28103	0.000402396	0.00700526	chrX	2146364	2148163	CG3091	FBgn0029608	0	1
	chrX	2148102	2148494	393	Peak_11850	142.697	0.994427	0.28103	0.000402396	0.00700526	chrX	2148435	2153896	CG3078	FBgn0023524	0	1
162	chrX	19663809	19665609	1801	Peak_13952	868.75	0.994278	0.274917	0.000298438	0.00559511	chrX	19660497	19677581	zld	FBgn0259789	0	2
	chrX	19663809	19665609	1801	Peak_13952	868.75	0.994278	0.274917	0.000298438	0.00559511	chrX	19653205	19658907	CG12702	FBgn0031070	-4903	2
163	chr2L	12391392	12391613	222	Peak_1456	47.5336	0.993254	0.39216	0.0113162	0.0769436	chr2L	12344218	12397528	bru2	FBgn0262475	0	1
	chr2L	12391392	12391613	222	Peak_1456	47.5336	0.993254	0.39216	0.0113162	0.0769436	chr2L	12398273	12402023	Pkd2	FBgn0041195	6661	1
164	chr3R	9750809	9751032	224	Peak_9365	78.7491	0.992878	0.333984	0.00295062	0.0297716	chr3R	9767959	9769182	Art9	FBgn0038188	16928	1
	chr3R	9750809	9751032	224	Peak_9365	78.7491	0.992878	0.333984	0.00295062	0.0297716	chr3R	9770375	9771534	Art6	FBgn0038189	19344	1
165	chr2L	5228643	5229040	398	Peak_627	123.486	0.992741	0.247299	5.96156e-05	0.00167208	chr2L	5218999	5244139	tkv	FBgn0003716	0	2
	chr2L	5228643	5229040	398	Peak_627	123.486	0.992741	0.247299	5.96156e-05	0.00167208	chr2L	5216700	5219053	TpnC25D	FBgn0031692	-9591	2
166	chr2R	3042929	3043228	300	Peak_2752	96.6538	0.99202	0.290611	0.000641194	0.00991676	chr2R	3038207	3110883	pk	FBgn0003090	0	1
	chr2R	3042929	3043228	300	Peak_2752	96.6538	0.99202	0.290611	0.000641194	0.00991676	chr2R	3041242	3042929	Spn43Ad	FBgn0044011	-1	1
167	chrX	13643023	13643618	596	Peak_13198	274.861	0.991975	0.333892	0.00296887	0.0298492	chrX	13639609	13649439	Pdcd4	FBgn0030520	0	1
	chrX	13643023	13643618	596	Peak_13198	274.861	0.991975	0.333892	0.00296887	0.0298492	chrX	13630602	13638716	Grip91	FBgn0001612	-4308	1
168	chr2R	13386763	13387959	1197	Peak_4136	710.796	0.989093	0.225724	1.17662e-05	0.000479329	chr2R	13389858	13396150	nw	FBgn0283508	1900	1
	chr2R	13386763	13387959	1197	Peak_4136	710.796	0.989093	0.225724	1.17662e-05	0.000479329	chr2R	13381199	13383503	CG30103	FBgn0050103	-3261	1
169	chrX	7532864	7533112	249	Peak_12507	75.4107	0.983475	0.338208	0.00363863	0.0345206	chrX	7503180	7572292	ct	FBgn0004198	0	1
	chrX	7532864	7533112	249	Peak_12507	75.4107	0.983475	0.338208	0.00363863	0.0345206	chrX	7576370	7603418	CHES-1-like	FBgn0029504	43259	2
170	chr3R	27868937	27869180	244	Peak_11457	90.5978	0.982942	0.30931	0.00148369	0.01861	chr3R	27871035	27877715	krz	FBgn0040206	1856	1
	chr3R	27868937	27869180	244	Peak_11457	90.5978	0.982942	0.30931	0.00148369	0.01861	chr3R	27864051	27865475	CG2053	FBgn0039887	-3463	1
171	chr3L	6367665	6368208	544	Peak_6031	198.705	0.982153	0.308448	0.00145165	0.018404	chr3L	6322423	6345490	CG13300	FBgn0035699	-22176	4
	chr3L	6367665	6368208	544	Peak_6031	198.705	0.982153	0.308448	0.00145165	0.018404	chr3L	6343375	6343929	Sfp65A	FBgn0259969	-23737	2
172	chr2R	20574712	20576248	1537	Peak_5105	467.514	0.982145	0.265047	0.000210937	0.00436574	chr2R	20558816	20572613	Mmp1	FBgn0035049	-2100	2	Mmp1-US
	chr2R	20574712	20576248	1537	Peak_5105	467.514	0.982145	0.265047	0.000210937	0.00436574	chr2R	20578944	20581909	ST6Gal	FBgn0035050	2697	1
173	chr2L	18752953	18753724	772	Peak_2084	397.497	0.98125	0.254168	0.000113094	0.00275637	chr2L	18762873	18782600	ham	FBgn0045852	9150	2
	chr2L	18752953	18753724	772	Peak_2084	397.497	0.98125	0.254168	0.000113094	0.00275637	chr2L	18740357	18740807	CG15167	FBgn0032709	-12147	1
174	chr2R	15728809	15729335	527	Peak_4447	160.009	0.978962	0.272976	0.000335463	0.00609111	chr2R	15729999	15731173	CG44569	FBgn0265762	665	1
	chr2R	15728809	15729335	527	Peak_4447	160.009	0.978962	0.272976	0.000335463	0.00609111	chr2R	15714082	15720478	Toll-7	FBgn0034476	-8332	1
175	chr3R	10535521	10536042	522	Peak_9480	114.581	0.978588	0.347244	0.00482997	0.0425472	chr3R	10523410	10549983	kibra	FBgn0262127	0	3
	chr3R	10535521	10536042	522	Peak_9480	114.581	0.978588	0.347244	0.00482997	0.0425472	chr3R	10490628	10523014	Meltrin	FBgn0265140	-12508	3
176	chr3R	27548705	27549024	320	Peak_11422	117.255	0.977571	0.263342	0.00020549	0.00427612	chr3R	27539588	27558490	ttk	FBgn0003870	0	2
	chr3R	27548705	27549024	320	Peak_11422	117.255	0.977571	0.263342	0.00020549	0.00427612	chr3R	27561224	27562685	CstF50	FBgn0039867	12201	1
177	chr3L	22704740	22705626	887	Peak_8139	229.711	0.977004	0.310192	0.00163453	0.0199078	chr3L	22705254	22706760	CG11370	FBgn0037181	0	1
	chr3L	22704740	22705626	887	Peak_8139	229.711	0.977004	0.310192	0.00163453	0.0199078	chr3L	22707412	22710677	ArfGAP3	FBgn0037182	1787	1
178	chr3L	395061	395686	626	Peak_5252	169.617	0.976882	0.32778	0.00287971	0.0294193	chr3L	366523	392633	trh	FBgn0262139	-2429	1
	chr3L	395061	395686	626	Peak_5252	169.617	0.976882	0.32778	0.00287971	0.0294193	chr3L	365663	366437	CG13884	FBgn0035138	-28625	1
179	chr2R	8930766	8930974	209	Peak_3600	74.9553	0.976278	0.367725	0.00793286	0.0602897	chr2R	8932199	8934761	CG13323	FBgn0033788	1226	1
	chr2R	8930766	8930974	209	Peak_3600	74.9553	0.976278	0.367725	0.00793286	0.0602897	chr2R	8936650	8937161	CG13324	FBgn0033789	5677	1
180	chr3L	20906114	20906403	290	Peak_7901	108.028	0.975125	0.315612	0.00200407	0.0229574	chr3L	20898894	20899431	CG11458	FBgn0040637	-6684	1
	chr3L	20906114	20906403	290	Peak_7901	108.028	0.975125	0.315612	0.00200407	0.0229574	chr3L	20918990	20942612	fng	FBgn0011591	12588	1
181	chr2L	707994	708737	744	Peak_137	447.94	0.974361	0.33681	0.00381693	0.0358989	chr2L	640012	714983	ds	FBgn0284247	0	3
	chr2L	707994	708737	744	Peak_137	447.94	0.974361	0.33681	0.00381693	0.0358989	chr2L	728361	730564	Hsp60B	FBgn0011244	19625	2
182	chr2L	20879695	20879974	280	Peak_2325	92.8019	0.972362	0.331411	0.00334619	0.0326369	chr2L	20871334	20885976	sky	FBgn0032901	0	1
	chr2L	20879695	20879974	280	Peak_2325	92.8019	0.972362	0.331411	0.00334619	0.0326369	chr2L	20869853	20871472	CG14401	FBgn0032900	-8224	1
183	chrX	8007815	8008262	448	Peak_12561	175.646	0.970776	0.272397	0.000365492	0.00645784	chrX	7996213	8010180	Gclc	FBgn0040319	0	1
	chrX	8007815	8008262	448	Peak_12561	175.646	0.970776	0.272397	0.000365492	0.00645784	chrX	8011044	8013163	CG1575	FBgn0029999	2783	1
184	chr3L	14050023	14050363	341	Peak_6995	101.444	0.969762	0.28135	0.000567226	0.00903224	chr3L	14046314	14064683	Frl	FBgn0267795	0	3
	chr3L	14050023	14050363	341	Peak_6995	101.444	0.969762	0.28135	0.000567226	0.00903224	chr3L	14045527	14046179	CG13484	FBgn0036406	-3845	1
185	chrX	15514442	15515062	621	Peak_13374	160.284	0.969692	0.30902	0.00170126	0.0204434	chrX	15497315	15520573	sog	FBgn0003463	0	1
	chrX	15514442	15515062	621	Peak_13374	160.284	0.969692	0.30902	0.00170126	0.0204434	chrX	15538254	15539024	CG8117	FBgn0030663	23193	1
186	chr3R	2696591	2696884	294	Peak_8529	103.315	0.96918	0.314664	0.00206968	0.0233496	chr3R	2690045	2691966	ftz	FBgn0001077	-4626	2
	chr3R	2696591	2696884	294	Peak_8529	103.315	0.96918	0.314664	0.00206968	0.0233496	chr3R	2648841	2674227	Scr	FBgn0003339	-22365	1
187	chr2R	14237415	14238043	629	Peak_4269	209.164	0.968679	0.251319	0.000116025	0.00280364	chr2R	14165702	14244801	sbb	FBgn0285917	0	1
	chr2R	14237415	14238043	629	Peak_4269	209.164	0.968679	0.251319	0.000116025	0.00280364	chr2R	14268897	14269349	CG43202	FBgn0262838	30855	1
188	chr3L	17988405	17988855	451	Peak_7538	137.032	0.96758	0.307801	0.00166928	0.020167	chr3L	17944052	18057796	Eip75B	FBgn0000568	0	5
	chr3L	17988405	17988855	451	Peak_7538	137.032	0.96758	0.307801	0.00166928	0.020167	chr3L	17996077	17996178	snoRNA:Me28S-A30	FBgn0086081	7223	2
189	chr3R	19765335	19766180	846	Peak_10567	396.622	0.967566	0.286932	0.00074594	0.0110763	chr3R	19761679	19768823	Gdh	FBgn0001098	0	1
	chr3R	19765335	19766180	846	Peak_10567	396.622	0.967566	0.286932	0.00074594	0.0110763	chr3R	19769349	19774105	CG12268	FBgn0039131	3170	1
190	chr2R	8553283	8553608	326	Peak_3536	168.905	0.967311	0.2389	5.14331e-05	0.00149909	chr2R	8547001	8553304	nemy	FBgn0261673	0	1
	chr2R	8553283	8553608	326	Peak_3536	168.905	0.967311	0.2389	5.14331e-05	0.00149909	chr2R	8557987	8562923	GLS	FBgn0261625	4380	1
191	chr2R	8425405	8425813	409	Peak_3521	96.4446	0.962062	0.346045	0.00543314	0.0460725	chr2R	8416557	8451689	fra	FBgn0011592	0	1
	chr2R	8425405	8425813	409	Peak_3521	96.4446	0.962062	0.346045	0.00543314	0.0460725	chr2R	8433193	8433806	CG33752	FBgn0053752	7381	1
192	chr2L	833259	833566	308	Peak_147	102.237	0.961591	0.290854	0.000946056	0.0133735	chr2L	833583	851071	drongo	FBgn0020304	18	1
	chr2L	833259	833566	308	Peak_147	102.237	0.961591	0.290854	0.000946056	0.0133735	chr2L	825968	833241	dock	FBgn0010583	-19	1
193	chr3R	1074461	1074866	406	Peak_8342	125.728	0.961303	0.264573	0.000279699	0.00530573	chr3R	1063372	1077467	CG12163	FBgn0260462	0	1
	chr3R	1074461	1074866	406	Peak_8342	125.728	0.961303	0.264573	0.000279699	0.00530573	chr3R	1078874	1081125	CG1113	FBgn0037304	4009	1
194	chr2L	654695	654985	291	Peak_123	129.635	0.960228	0.321239	0.00279764	0.0288037	chr2L	640012	714983	ds	FBgn0284247	0	3
	chr2L	654695	654985	291	Peak_123	129.635	0.960228	0.321239	0.00279764	0.0288037	chr2L	625651	628200	CG2839	FBgn0031273	-26496	1
195	chr2L	19789299	19789739	441	Peak_2213	121.37	0.960193	0.301263	0.00143645	0.0183099	chr2L	19774873	19791882	CdGAPr	FBgn0032821	0	1
	chr2L	19789299	19789739	441	Peak_2213	121.37	0.960193	0.301263	0.00143645	0.0183099	chr2L	19792103	19792782	CG10466	FBgn0032822	2365	1
196	chr3L	20192289	20192668	380	Peak_7811	151.865	0.959929	0.250535	0.000127356	0.00301054	chr3L	20193192	20193587	CG42833	FBgn0262022	525	1
	chr3L	20192289	20192668	380	Peak_7811	151.865	0.959929	0.250535	0.000127356	0.00301054	chr3L	20142713	20191417	CG42674	FBgn0261556	-873	1
197	chr3R	4035687	4036171	485	Peak_8696	134.59	0.959556	0.31307	0.00217678	0.0242865	chr3R	4029916	4030552	CheA84a	FBgn0261290	-5136	3
	chr3R	4035687	4036171	485	Peak_8696	134.59	0.959556	0.31307	0.00217678	0.0242865	chr3R	4043678	4045456	CG7800	FBgn0037552	7508	1
198	chr3L	6799942	6800291	350	Peak_6071	109.179	0.95866	0.34057	0.00487965	0.0428705	chr3L	6783257	6787637	vvl	FBgn0086680	-12306	1
	chr3L	6799942	6800291	350	Peak_6071	109.179	0.95866	0.34057	0.00487965	0.0428705	chr3L	6749728	6756346	CG32392	FBgn0052392	-43597	1
199	chr3R	9851449	9851992	544	Peak_9389	242.392	0.958389	0.279859	0.000615828	0.00960583	chr3R	9854949	9857205	Cyp6d5	FBgn0038194	2958	4
	chr3R	9851449	9851992	544	Peak_9389	242.392	0.958389	0.279859	0.000615828	0.00960583	chr3R	9858092	9860763	CG3061	FBgn0038195	6101	4
200	chrX	2812529	2813000	472	Peak_11937	207.624	0.958163	0.285325	0.000784661	0.0115301	chrX	2634416	3026824	kirre	FBgn0028369	0	5
	chrX	2812529	2813000	472	Peak_11937	207.624	0.958163	0.285325	0.000784661	0.0115301	chrX	2813802	2817501	CG3588	FBgn0025643	803	1
201	chr2L	13150879	13151090	212	Peak_1552	87.5833	0.958106	0.318886	0.0026598	0.0278346	chr2L	13143213	13143622	CG16978	FBgn0040972	-7258	2
	chr2L	13150879	13151090	212	Peak_1552	87.5833	0.958106	0.318886	0.0026598	0.0278346	chr2L	13158809	13160173	Pk34A	FBgn0028410	7720	1
202	chr2L	6502922	6503251	330	Peak_769	137.494	0.957475	0.300394	0.00143557	0.0183099	chr2L	6498646	6526919	CG31637	FBgn0051637	0	1
	chr2L	6502922	6503251	330	Peak_769	137.494	0.957475	0.300394	0.00143557	0.0183099	chr2L	6497052	6498466	CG9550	FBgn0031826	-4457	1
203	chr2R	12491579	12492165	587	Peak_4042	305.861	0.957232	0.233168	4.03732e-05	0.00122999	chr2R	12482532	12491878	CG8303	FBgn0034143	0	1
	chr2R	12491579	12492165	587	Peak_4042	305.861	0.957232	0.233168	4.03732e-05	0.00122999	chr2R	12495158	12512399	CG5065	FBgn0034145	2994	1
204	chrX	3303610	3303944	335	Peak_12018	139.524	0.956411	0.319325	0.00274354	0.0283908	chrX	3281976	3342976	CG12535	FBgn0029657	0	3
	chrX	3303610	3303944	335	Peak_12018	139.524	0.956411	0.319325	0.00274354	0.0283908	chrX	3267191	3280044	Myc	FBgn0262656	-23567	3
205	chr3R	15101644	15102345	702	Peak_10023	313.617	0.954193	0.275348	0.000529437	0.00861233	chr3R	15082498	15085854	CG14280	FBgn0038695	-15791	2
	chr3R	15101644	15102345	702	Peak_10023	313.617	0.954193	0.275348	0.000529437	0.00861233	chr3R	15122967	15123417	CG44174	FBgn0265063	20623	2
206	chr3R	1126530	1126942	413	Peak_8352	113.996	0.95378	0.331354	0.00399653	0.0370921	chr3R	1125866	1126908	Tim17b1	FBgn0037310	0	1
	chr3R	1126530	1126942	413	Peak_8352	113.996	0.95378	0.331354	0.00399653	0.0370921	chr3R	1095837	1105630	mtd	FBgn0013576	-20901	1
207	chr3R	26649496	26649816	321	Peak_11318	144.386	0.952169	0.337382	0.00476916	0.0421355	chr3R	26634338	26652281	cindr	FBgn0027598	0	1
	chr3R	26649496	26649816	321	Peak_11318	144.386	0.952169	0.337382	0.00476916	0.0421355	chr3R	26653540	26667756	CG15544	FBgn0039804	3725	1
208	chr3L	17596989	17597338	350	Peak_7483	98.8776	0.9507	0.368149	0.00981219	0.0697011	chr3L	17613222	17614725	Vps60	FBgn0036740	15885	2
	chr3L	17596989	17597338	350	Peak_7483	98.8776	0.9507	0.368149	0.00981219	0.0697011	chr3L	17614923	17624071	CG7510	FBgn0036741	17586	1
209	chr2L	1424611	1425406	796	Peak_197	492.609	0.950101	0.211432	7.0014e-06	0.00032881	chr2L	1428473	1429159	CG43401	FBgn0263320	3068	1
	chr2L	1424611	1425406	796	Peak_197	492.609	0.950101	0.211432	7.0014e-06	0.00032881	chr2L	1380085	1420453	robo2	FBgn0002543	-4159	1
210	chr2L	1688243	1688576	334	Peak_241	150.307	0.949172	0.363045	0.00893651	0.0653188	chr2L	1651257	1704682	chinmo	FBgn0086758	0	1
	chr2L	1688243	1688576	334	Peak_241	150.307	0.949172	0.363045	0.00893651	0.0653188	chr2L	1704901	1706777	cpb	FBgn0011570	16326	1
211	chr2L	15415977	15416363	387	Peak_1822	110.215	0.948961	0.353421	0.0072514	0.0569161	chr2L	15417928	15418361	CG44869	FBgn0266163	1566	1
	chr2L	15415977	15416363	387	Peak_1822	110.215	0.948961	0.353421	0.0072514	0.0569161	chr2L	15423296	15425580	wor	FBgn0001983	6934	1
212	chr3R	17029537	17030200	664	Peak_10212	307.765	0.947883	0.271824	0.000488257	0.00807252	chr3R	16966460	17038409	SNF4Agamma	FBgn0264357	0	2
	chr3R	17029537	17030200	664	Peak_10212	307.765	0.947883	0.271824	0.000488257	0.00807252	chr3R	17040800	17041948	CG5862	FBgn0038868	10601	2
213	chr2L	4219027	4219756	730	Peak_513	283.208	0.947106	0.387991	0.0146444	0.0914392	chr2L	4198403	4221796	ft	FBgn0001075	0	1
	chr2L	4219027	4219756	730	Peak_513	283.208	0.947106	0.387991	0.0146444	0.0914392	chr2L	4224649	4226980	CG3702	FBgn0031590	4894	1
214	chr3L	10289522	10290186	665	Peak_6467	241.674	0.946596	0.276456	0.000616984	0.00960583	chr3L	10266303	10267724	Or67d	FBgn0036080	-21799	1
	chr3L	10289522	10290186	665	Peak_6467	241.674	0.946596	0.276456	0.000616984	0.00960583	chr3L	10312884	10312983	mir-276b	FBgn0262381	22699	2
215	chr3L	6330994	6331436	443	Peak_6020	130.462	0.945148	0.345841	0.00627795	0.0510322	chr3L	6322423	6345490	CG13300	FBgn0035699	0	4
	chr3L	6330994	6331436	443	Peak_6020	130.462	0.945148	0.345841	0.00627795	0.0510322	chr3L	6320707	6322169	Or65c	FBgn0041623	-8826	1
216	chr3L	14144664	14145171	508	Peak_7009	162.341	0.945135	0.331298	0.00433331	0.0391661	chr3L	14105504	14124397	Sox21b	FBgn0042630	-20268	1
	chr3L	14144664	14145171	508	Peak_7009	162.341	0.945135	0.331298	0.00433331	0.0391661	chr3L	14179348	14182748	nan	FBgn0036414	34178	1
217	chrX	8615597	8615881	285	Peak_12637	100.274	0.943868	0.319899	0.00317243	0.0314261	chrX	8614552	8615536	CG1789	FBgn0030063	-62	4
	chrX	8615597	8615881	285	Peak_12637	100.274	0.943868	0.319899	0.00317243	0.0314261	chrX	8610745	8614310	l(1)G0020	FBgn0027330	-1288	1
218	chr3L	839592	840009	418	Peak_5366	143.21	0.942031	0.257477	0.000253491	0.00493573	chr3L	837860	839931	CG13887	FBgn0035165	0	1
	chr3L	839592	840009	418	Peak_5366	143.21	0.942031	0.257477	0.000253491	0.00493573	chr3L	839979	841360	CG13902	FBgn0035166	0	1
219	chr2R	19460551	19461404	854	Peak_4931	391.2	0.939304	0.257249	0.000260877	0.00502419	chr2R	19452413	19487049	apt	FBgn0015903	0	5
	chr2R	19460551	19461404	854	Peak_4931	391.2	0.939304	0.257249	0.000260877	0.00502419	chr2R	19451495	19452303	CG30184	FBgn0050184	-8249	3
220	chr3R	9830704	9831220	517	Peak_9382	238.155	0.938542	0.356603	0.00849089	0.0630985	chr3R	9854949	9857205	Cyp6d5	FBgn0038194	23730	4
	chr3R	9830704	9831220	517	Peak_9382	238.155	0.938542	0.356603	0.00849089	0.0630985	chr3R	9858092	9860763	CG3061	FBgn0038195	26873	4
221	chr3R	19052315	19052801	487	Peak_10470	190.733	0.938458	0.244183	0.00012141	0.0029188	chr3R	19053448	19074625	CG4467	FBgn0039064	648	1
	chr3R	19052315	19052801	487	Peak_10470	190.733	0.938458	0.244183	0.00012141	0.0029188	chr3R	19075164	19077199	Rad60	FBgn0039065	22364	1
222	chr3L	15246994	15247700	707	Peak_7172	329.885	0.937053	0.269319	0.000502647	0.00826212	chr3L	15228718	15235932	Tollo	FBgn0029114	-11063	2
	chr3L	15246994	15247700	707	Peak_7172	329.885	0.937053	0.269319	0.000502647	0.00826212	chr3L	15292057	15294042	Best4	FBgn0036491	44358	1
223	chr2L	18774030	18774365	336	Peak_2086	96.1135	0.936973	0.369925	0.0113132	0.0769436	chr2L	18762873	18782600	ham	FBgn0045852	0	2
	chr2L	18774030	18774365	336	Peak_2086	96.1135	0.936973	0.369925	0.0113132	0.0769436	chr2L	18804490	18805347	CG43814	FBgn0264362	30126	1
224	chrX	6890169	6890531	363	Peak_12435	128.747	0.935157	0.217206	1.66684e-05	0.000633397	chrX	6892704	6897528	Inx2	FBgn0027108	2174	1
	chrX	6890169	6890531	363	Peak_12435	128.747	0.935157	0.217206	1.66684e-05	0.000633397	chrX	6885644	6887645	Inx7	FBgn0027106	-2525	1
225	chr2L	14850353	14850888	536	Peak_1765	111.265	0.93466	0.295882	0.00158368	0.019569	chr2L	14844992	14851749	CG15279	FBgn0028886	0	1
	chr2L	14850353	14850888	536	Peak_1765	111.265	0.93466	0.295882	0.00158368	0.019569	chr2L	14842357	14843108	CG42682	FBgn0261568	-7246	1
226	chr2L	8086731	8087165	435	Peak_990	158.902	0.933138	0.287877	0.00118926	0.0158748	chr2L	8083419	8116531	Bsg	FBgn0261822	0	1
	chr2L	8086731	8087165	435	Peak_990	158.902	0.933138	0.287877	0.00118926	0.0158748	chr2L	8074116	8082982	Mcr	FBgn0267488	-3750	1
227	chr3R	15529131	15529600	470	Peak_10073	184.119	0.931311	0.304636	0.00223471	0.0246673	chr3R	15497171	15524272	Naam	FBgn0051216	-4860	1
	chr3R	15529131	15529600	470	Peak_10073	184.119	0.931311	0.304636	0.00223471	0.0246673	chr3R	15540907	15541649	CG34286	FBgn0085315	11308	1
228	chr2L	8012420	8012968	549	Peak_981	238.594	0.929087	0.306336	0.00242216	0.0261771	chr2L	8011404	8026898	Tg	FBgn0031975	0	1
	chr2L	8012420	8012968	549	Peak_981	238.594	0.929087	0.306336	0.00242216	0.0261771	chr2L	8009602	8010652	Glyat	FBgn0054010	-1769	1
229	chr2L	17743031	17743316	286	Peak_1986	133.965	0.929004	0.297988	0.00182336	0.0215268	chr2L	17647052	17752346	CadN	FBgn0015609	0	1
	chr2L	17743031	17743316	286	Peak_1986	133.965	0.929004	0.297988	0.00182336	0.0215268	chr2L	17704680	17706142	CG43231	FBgn0262876	-36890	1
230	chr2R	5118465	5119312	848	Peak_3044	402.033	0.928928	0.201477	4.0152e-06	0.00021258	chr2R	5115289	5134754	hig	FBgn0010114	0	1
	chr2R	5118465	5119312	848	Peak_3044	402.033	0.928928	0.201477	4.0152e-06	0.00021258	chr2R	5125016	5127336	Cyp4p2	FBgn0033395	5705	1
231	chr3R	11362844	11363324	481	Peak_9573	170.141	0.928482	0.329899	0.0048861	0.0429005	chr3R	11357858	11363014	AOX1	FBgn0267408	0	1
	chr3R	11362844	11363324	481	Peak_9573	170.141	0.928482	0.329899	0.0048861	0.0429005	chr3R	11363434	11368136	AOX2	FBgn0038348	111	1
232	chr3L	21784644	21785101	458	Peak_8038	142.781	0.927889	0.320992	0.00384398	0.0360096	chr3L	21801802	21810700	eg	FBgn0000560	16702	2
	chr3L	21784644	21785101	458	Peak_8038	142.781	0.927889	0.320992	0.00384398	0.0360096	chr3L	21762914	21764421	CG7370	FBgn0037133	-20224	2
233	chr2R	2424297	2424602	306	Peak_2662	96.08	0.927672	0.347478	0.00759122	0.058575	chr2R	2389510	2506887	jing	FBgn0086655	0	2
	chr2R	2424297	2424602	306	Peak_2662	96.08	0.927672	0.347478	0.00759122	0.058575	chr2R	2487548	2488483	CG15233	FBgn0033076	62947	2
234	chr2L	4801546	4802301	756	Peak_571	455.587	0.925507	0.299693	0.00201381	0.0230317	chr2L	4796599	4801923	Clect27	FBgn0031629	0	1
	chr2L	4801546	4802301	756	Peak_571	455.587	0.925507	0.299693	0.00201381	0.0230317	chr2L	4794548	4796576	CG3294	FBgn0031628	-4971	1
235	chr2L	110129	110475	347	Peak_22	126.636	0.924527	0.353868	0.00898481	0.0655701	chr2L	106902	114432	Sam-S	FBgn0005278	0	1
	chr2L	110129	110475	347	Peak_22	126.636	0.924527	0.353868	0.00898481	0.0655701	chr2L	103961	106732	Nhe1	FBgn0026787	-3398	1
236	chr3L	14056909	14057411	503	Peak_6998	158.945	0.924354	0.278008	0.000884442	0.0126659	chr3L	14046314	14064683	Frl	FBgn0267795	0	3
	chr3L	14056909	14057411	503	Peak_6998	158.945	0.924354	0.278008	0.000884442	0.0126659	chr3L	14064991	14069223	Pex1	FBgn0013563	7581	2
237	chr3R	17239941	17241407	1467	Peak_10243	554.975	0.924117	0.269488	0.000605454	0.00946758	chr3R	17235700	17259855	lbl	FBgn0008651	0	3
	chr3R	17239941	17241407	1467	Peak_10243	554.975	0.924117	0.269488	0.000605454	0.00946758	chr3R	17234844	17235646	CheB93b	FBgn0051438	-4296	2
238	chr2L	12520264	12520717	454	Peak_1476	340.14	0.924077	0.234062	7.88089e-05	0.00204787	chr2L	12455539	12546611	bun	FBgn0259176	0	3
	chr2L	12520264	12520717	454	Peak_1476	340.14	0.924077	0.234062	7.88089e-05	0.00204787	chr2L	12508107	12508254	snoRNA:CG43051-a	FBgn0263458	-12011	2
239	chr3R	6482184	6483034	851	Peak_9042	384.314	0.923586	0.297287	0.00189181	0.0220648	chr3R	6501281	6502973	CG6465	FBgn0037818	18248	3
	chr3R	6482184	6483034	851	Peak_9042	384.314	0.923586	0.297287	0.00189181	0.0220648	chr3R	6503458	6506647	CG14688	FBgn0037819	20425	2
240	chr3L	3411075	3411408	334	Peak_5697	104.328	0.922565	0.291239	0.00153636	0.0190843	chr3L	3401152	3424935	sty	FBgn0014388	0	1
	chr3L	3411075	3411408	334	Peak_5697	104.328	0.922565	0.291239	0.00153636	0.0190843	chr3L	3412144	3412251	mir-2282	FBgn0262260	737	1
241	chrX	18154730	18155342	613	Peak_13724	200.713	0.919124	0.345678	0.00783955	0.0598379	chrX	18152583	18153550	CG15059	FBgn0030905	-1181	2
	chrX	18154730	18155342	613	Peak_13724	200.713	0.919124	0.345678	0.00783955	0.0598379	chrX	18171265	18178629	upd3	FBgn0053542	15924	1
242	chr2L	14559021	14559465	445	Peak_1724	142.078	0.918754	0.345266	0.00779076	0.0595943	chr2L	14563014	14563726	CG3473	FBgn0028913	3550	1
	chr2L	14559021	14559465	445	Peak_1724	142.078	0.918754	0.345266	0.00779076	0.0595943	chr2L	14547497	14549109	CG4218	FBgn0250844	-9913	1
243	chr3L	3978238	3978544	307	Peak_5777	102.986	0.917656	0.243883	0.000168096	0.00366699	chr3L	3972898	3973784	CG43915	FBgn0264516	-4455	1
	chr3L	3978238	3978544	307	Peak_5777	102.986	0.917656	0.243883	0.000168096	0.00366699	chr3L	3983895	3988569	scrt	FBgn0004880	5352	1
244	chr2R	20472072	20472466	395	Peak_5090	104.769	0.91572	0.333274	0.00600248	0.0493994	chr2R	20468767	20485385	pio	FBgn0020521	0	1
	chr2R	20472072	20472466	395	Peak_5090	104.769	0.91572	0.333274	0.00600248	0.0493994	chr2R	20465769	20467350	CG4681	FBgn0069913	-4723	1
245	chr3R	11950901	11951258	358	Peak_9637	125.743	0.915285	0.333135	0.00600538	0.0493994	chr3R	11941882	11971006	Sb	FBgn0003319	0	1
	chr3R	11950901	11951258	358	Peak_9637	125.743	0.915285	0.333135	0.00600538	0.0493994	chr3R	11970122	11972577	CG5903	FBgn0038400	18865	1
246	chr3R	864689	864958	270	Peak_8307	106.289	0.915106	0.328629	0.00535903	0.0456632	chr3R	812221	836753	plh	FBgn0037292	-27937	3
	chr3R	864689	864958	270	Peak_8307	106.289	0.915106	0.328629	0.00535903	0.0456632	chr3R	903500	912794	corto	FBgn0010313	38543	4
247	chrX	9384860	9385269	410	Peak_12728	146.021	0.913652	0.358079	0.0107248	0.0738462	chrX	9252528	9394162	mgl	FBgn0261260	0	4
	chrX	9384860	9385269	410	Peak_12728	146.021	0.913652	0.358079	0.0107248	0.0738462	chrX	9396858	9444871	CG32700	FBgn0267253	11590	3
248	chr2L	8293177	8293465	289	Peak_1017	85.3692	0.911572	0.332543	0.00612122	0.0501231	chr2L	8258372	8300746	Btk29A	FBgn0003502	0	3
	chr2L	8293177	8293465	289	Peak_1017	85.3692	0.911572	0.332543	0.00612122	0.0501231	chr2L	8301344	8302985	wol	FBgn0261020	7880	2
249	chrX	19467810	19468126	317	Peak_13909	138.097	0.910543	0.302851	0.00264212	0.0277145	chrX	19463753	19473833	Tao	FBgn0031030	0	1
	chrX	19467810	19468126	317	Peak_13909	138.097	0.910543	0.302851	0.00264212	0.0277145	chrX	19460051	19463434	car	FBgn0000257	-4377	1
250	chrX	16473412	16474000	589	Peak_13498	171.346	0.910068	0.249083	0.000258517	0.00500357	chrX	16454716	16480698	CanA-14F	FBgn0267912	0	1
	chrX	16473412	16474000	589	Peak_13498	171.346	0.910068	0.249083	0.000258517	0.00500357	chrX	16481905	16482963	CG13014	FBgn0030759	7906	1
251	chr3R	14905000	14906955	1956	Peak_9991	497.393	0.909679	0.260104	0.000469885	0.00787295	chr3R	14870603	14919992	cdi	FBgn0004876	0	1
	chr3R	14905000	14906955	1956	Peak_9991	497.393	0.909679	0.260104	0.000469885	0.00787295	chr3R	14920115	14920627	mRpL55	FBgn0038678	13161	1
252	chrX	1178208	1178686	479	Peak_11714	183.119	0.909133	0.312428	0.00361543	0.0343697	chrX	1181322	1182978	CG32812	FBgn0025642	2637	3
	chrX	1178208	1178686	479	Peak_11714	183.119	0.909133	0.312428	0.00361543	0.0343697	chrX	1183745	1188720	DAAM	FBgn0025641	5060	1
253	chr2L	8699811	8700075	265	Peak_1078	100.484	0.908556	0.323393	0.00496261	0.0433569	chr2L	8687225	8709042	Hnf4	FBgn0004914	0	1
	chr2L	8699811	8700075	265	Peak_1078	100.484	0.908556	0.323393	0.00496261	0.0433569	chr2L	8705571	8707527	CG9314	FBgn0032061	5497	1
254	chr3L	20625094	20625583	490	Peak_7870	166.629	0.908012	0.345944	0.00867167	0.0639785	chr3L	20630298	20634010	CG13251	FBgn0037014	4716	2
	chr3L	20625094	20625583	490	Peak_7870	166.629	0.908012	0.345944	0.00867167	0.0639785	chr3L	20590240	20613759	knrl	FBgn0001323	-11336	2
255	chrX	6154117	6154428	312	Peak_12320	89.6208	0.907128	0.362483	0.0123306	0.0812615	chrX	6151700	6161261	schlank	FBgn0040918	0	1
	chrX	6154117	6154428	312	Peak_12320	89.6208	0.907128	0.362483	0.0123306	0.0812615	chrX	6155201	6156152	CG3781	FBgn0029853	774	1
256	chr3L	2144383	2144733	351	Peak_5524	111.567	0.906213	0.311575	0.00363177	0.0344787	chr3L	2117465	2151700	zormin	FBgn0052311	0	2
	chr3L	2144383	2144733	351	Peak_5524	111.567	0.906213	0.311575	0.00363177	0.0344787	chr3L	2153200	2163863	CG15822	FBgn0035308	8468	1
257	chr2L	2165705	2167345	1641	Peak_289	818.924	0.905498	0.285662	0.00152531	0.019014	chr2L	2156483	2178754	aop	FBgn0000097	0	1
	chr2L	2165705	2167345	1641	Peak_289	818.924	0.905498	0.285662	0.00152531	0.019014	chr2L	2155752	2156790	CG15382	FBgn0031393	-8916	1
258	chr2R	4545267	4545998	732	Peak_2961	252.135	0.905418	0.276826	0.00107277	0.0147604	chr2R	4537153	4552728	ptc	FBgn0003892	0	3
	chr2R	4545267	4545998	732	Peak_2961	252.135	0.905418	0.276826	0.00107277	0.0147604	chr2R	4553317	4570527	Acsl	FBgn0263120	7320	3
259	chrX	15391610	15392351	742	Peak_13357	169.719	0.903656	0.289531	0.00180171	0.0213487	chrX	15380954	15404816	Gmap	FBgn0027287	0	1
	chrX	15391610	15392351	742	Peak_13357	169.719	0.903656	0.289531	0.00180171	0.0213487	chrX	15401988	15402088	mir-283	FBgn0262426	9638	1
260	chr2R	18892129	18893194	1066	Peak_4857	380.511	0.903624	0.302956	0.00285727	0.0292896	chr2R	18872896	18935848	twi	FBgn0003900	0	1
	chr2R	18892129	18893194	1066	Peak_4857	380.511	0.903624	0.302956	0.00285727	0.0292896	chr2R	18898600	18930466	CG42741	FBgn0261705	5407	1
261	chr2R	9458415	9458715	301	Peak_3655	121.446	0.902468	0.276939	0.00111913	0.0152409	chr2R	9458099	9460264	CG42807	FBgn0261989	0	1
	chr2R	9458415	9458715	301	Peak_3655	121.446	0.902468	0.276939	0.00111913	0.0152409	chr2R	9461122	9461762	CG42808	FBgn0261990	2408	2
262	chrX	13425062	13425569	508	Peak_13168	148.478	0.90194	0.30471	0.00307648	0.030691	chrX	13423688	13424282	CG44428	FBgn0265610	-781	1
	chrX	13425062	13425569	508	Peak_13168	148.478	0.90194	0.30471	0.00307648	0.030691	chrX	13422038	13423313	CG15754	FBgn0030492	-1750	1
263	chr3R	8198307	8199062	756	Peak_9214	397.456	0.901388	0.252181	0.000351069	0.00625975	chr3R	8197692	8198426	GstD2	FBgn0010038	0	1
	chr3R	8198307	8199062	756	Peak_9214	397.456	0.901388	0.252181	0.000351069	0.00625975	chr3R	8198789	8199535	GstD3	FBgn0010039	0	1
264	chr3L	18888075	18888480	406	Peak_7660	139.053	0.900875	0.345587	0.00913939	0.0664538	chr3L	18886219	18891393	CG3902	FBgn0036824	0	1
	chr3L	18888075	18888480	406	Peak_7660	139.053	0.900875	0.345587	0.00913939	0.0664538	chr3L	18889288	18889556	snoRNA:Psi28S-2566	FBgn0086661	809	1
265	chrX	15864127	15864633	507	Peak_13422	148.998	0.900757	0.296208	0.00235822	0.0256429	chrX	15840968	15867100	mmd	FBgn0259110	0	1
	chrX	15864127	15864633	507	Peak_13422	148.998	0.900757	0.296208	0.00235822	0.0256429	chrX	15868457	15870739	Or13a	FBgn0030715	3825	1
266	chr3L	11274820	11275349	530	Peak_6643	294.811	0.899873	0.285712	0.00163504	0.0199078	chr3L	11281035	11289019	CG6175	FBgn0036152	5687	1
	chr3L	11274820	11275349	530	Peak_6643	294.811	0.899873	0.285712	0.00163504	0.0199078	chr3L	11245406	11249272	scyl	FBgn0041094	-25549	1
267	chr2R	5437555	5437983	429	Peak_3084	169.815	0.899708	0.246305	0.000259367	0.00500876	chr2R	5429451	5434463	CG1888	FBgn0033421	-3093	1
	chr2R	5437555	5437983	429	Peak_3084	169.815	0.899708	0.246305	0.000259367	0.00500876	chr2R	5441266	5441329	mir-14	FBgn0262447	3284	1
268	chr2L	6695357	6695774	418	Peak_799	128.837	0.898007	0.261803	0.00060339	0.00944577	chr2L	6686790	6689393	Tsp	FBgn0031850	-5965	1
	chr2L	6695357	6695774	418	Peak_799	128.837	0.898007	0.261803	0.00060339	0.00944577	chr2L	6684841	6686712	CG11327	FBgn0031849	-8646	1
269	chr3L	11344096	11344451	356	Peak_6661	97.2814	0.896728	0.300892	0.00288033	0.0294193	chr3L	11355085	11357985	CG6163	FBgn0036155	10635	4
	chr3L	11344096	11344451	356	Peak_6661	97.2814	0.896728	0.300892	0.00288033	0.0294193	chr3L	11312741	11314819	CG6168	FBgn0036154	-29278	4
270	chr3L	6456378	6457454	1077	Peak_6045	334.54	0.894049	0.29757	0.0026602	0.0278346	chr3L	6393689	6479064	CG42747	FBgn0261801	0	2
	chr3L	6456378	6457454	1077	Peak_6045	334.54	0.894049	0.29757	0.0026602	0.0278346	chr3L	6479266	6481524	CG10147	FBgn0035702	21813	1
271	chr2R	7815187	7815487	301	Peak_3441	99.1057	0.891071	0.322892	0.00578627	0.0480016	chr2R	7827061	7854940	exp	FBgn0033668	11575	2
	chr2R	7815187	7815487	301	Peak_3441	99.1057	0.891071	0.322892	0.00578627	0.0480016	chr2R	7791827	7800284	reb	FBgn0033667	-14904	3
272	chrX	200167	200490	324	Peak_11582	97.4187	0.89024	0.238359	0.000187811	0.00396845	chrX	173735	244235	CG3777	FBgn0024989	0	1
	chrX	200167	200490	324	Peak_11582	97.4187	0.89024	0.238359	0.000187811	0.00396845	chrX	201716	202968	CG12470	FBgn0040371	1227	1
273	chr3R	6500874	6501182	309	Peak_9050	96.6893	0.889559	0.342304	0.00935679	0.0672775	chr3R	6501281	6502973	CG6465	FBgn0037818	100	3
	chr3R	6500874	6501182	309	Peak_9050	96.6893	0.889559	0.342304	0.00935679	0.0672775	chr3R	6503458	6506647	CG14688	FBgn0037819	2277	2
274	chrX	4358582	4359227	646	Peak_12141	307.259	0.889103	0.26633	0.000842765	0.0122565	chrX	4306888	4378485	bi	FBgn0000179	0	3
	chrX	4358582	4359227	646	Peak_12141	307.259	0.889103	0.26633	0.000842765	0.0122565	chrX	4424263	4427873	CG3556	FBgn0029708	65037	2
275	chr3R	9105204	9105721	518	Peak_9282	161.486	0.888425	0.284842	0.00181459	0.0214833	chr3R	9105442	9110249	CG8630	FBgn0038130	0	1
	chr3R	9105204	9105721	518	Peak_9282	161.486	0.888425	0.284842	0.00181459	0.0214833	chr3R	9110667	9112251	CG15888	FBgn0038131	4947	1
276	chrX	9824819	9825375	557	Peak_12775	472.099	0.888058	0.21474	3.54164e-05	0.00111255	chrX	9822005	9824981	Idgf4	FBgn0026415	0	2
	chrX	9824819	9825375	557	Peak_12775	472.099	0.888058	0.21474	3.54164e-05	0.00111255	chrX	9823921	9824039	snoRNA:Me28S-U1688	FBgn0086044	-781	2
277	chr2L	5230350	5231212	863	Peak_628	360.423	0.887873	0.30276	0.00336137	0.0326596	chr2L	5218999	5244139	tkv	FBgn0003716	0	2
	chr2L	5230350	5231212	863	Peak_628	360.423	0.887873	0.30276	0.00336137	0.0326596	chr2L	5216700	5219053	TpnC25D	FBgn0031692	-11298	2
278	chr3R	12222071	12222547	477	Peak_9706	174.727	0.886426	0.268967	0.000981869	0.0137045	chr3R	12200155	12229405	ss	FBgn0003513	0	1
	chr3R	12222071	12222547	477	Peak_9706	174.727	0.886426	0.268967	0.000981869	0.0137045	chr3R	12194576	12196255	CG10317	FBgn0038423	-25817	1
279	chrX	4507485	4507894	410	Peak_12167	160.281	0.885217	0.286296	0.00198834	0.0228328	chrX	4511596	4521239	peb	FBgn0003053	3703	1
	chrX	4507485	4507894	410	Peak_12167	160.281	0.885217	0.286296	0.00198834	0.0228328	chrX	4521412	4524969	CG12184	FBgn0025387	13519	1
280	chr3L	2531397	2531695	299	Peak_5564	105.047	0.884797	0.309376	0.00423713	0.0385431	chr3L	2505244	2536585	Spn	FBgn0010905	0	1
	chr3L	2531397	2531695	299	Peak_5564	105.047	0.884797	0.309376	0.00423713	0.0385431	chr3L	2525798	2526973	CG32295	FBgn0260480	-4425	1
281	chr3L	6117886	6118170	285	Peak_5986	107.701	0.883627	0.314184	0.00491657	0.0430878	chr3L	6117033	6121907	l(3)mbn	FBgn0002440	0	1
	chr3L	6117886	6118170	285	Peak_5986	107.701	0.883627	0.314184	0.00491657	0.0430878	chr3L	6090716	6117013	Ets65A	FBgn0005658	-874	1
282	chr3L	21094473	21094765	293	Peak_7943	93.9789	0.883247	0.302504	0.00350272	0.0336375	chr3L	21068680	21124259	ko	FBgn0020294	0	1
	chr3L	21094473	21094765	293	Peak_7943	93.9789	0.883247	0.302504	0.00350272	0.0336375	chr3L	21081322	21082089	CG33285	FBgn0053285	-12385	1
283	chrX	10704752	10705343	592	Peak_12873	317.198	0.883063	0.31708	0.00535301	0.0456496	chrX	10681901	10715850	Imp	FBgn0285926	0	4
	chrX	10704752	10705343	592	Peak_12873	317.198	0.883063	0.31708	0.00535301	0.0456496	chrX	10726784	10741125	sbr	FBgn0003321	21442	3
284	chr2R	4039624	4039918	295	Peak_2900	125.239	0.882847	0.285969	0.00202041	0.0230725	chr2R	4034422	4036083	kermit	FBgn0010504	-3542	1
	chr2R	4039624	4039918	295	Peak_2900	125.239	0.882847	0.285969	0.00202041	0.0230725	chr2R	4024490	4033486	Lpin	FBgn0263593	-6139	1
285	chrX	3034768	3035220	453	Peak_11980	303.702	0.882005	0.271002	0.00113552	0.0154047	chrX	3028902	3066254	N	FBgn0004647	0	1
	chrX	3034768	3035220	453	Peak_11980	303.702	0.882005	0.271002	0.00113552	0.0154047	chrX	2634416	3026824	kirre	FBgn0028369	-7945	5
286	chrX	6870459	6871071	613	Peak_12427	235.805	0.881846	0.288772	0.00225975	0.0248784	chrX	6867652	6885351	ogre	FBgn0004646	0	1
	chrX	6870459	6871071	613	Peak_12427	235.805	0.881846	0.288772	0.00225975	0.0248784	chrX	6866356	6867426	CG3040	FBgn0029925	-3034	1
287	chrX	1742895	1743387	493	Peak_11775	131.433	0.880432	0.307118	0.00414706	0.0380915	chrX	1667751	1746966	prage	FBgn0283741	0	1
	chrX	1742895	1743387	493	Peak_11775	131.433	0.880432	0.307118	0.00414706	0.0380915	chrX	1751921	1753004	CG14812	FBgn0026090	8535	1
288	chr2L	4576499	4577062	564	Peak_550	212.055	0.878913	0.312615	0.00493133	0.0431904	chr2L	4477461	4591963	dpy	FBgn0053196	0	2
	chr2L	4576499	4577062	564	Peak_550	212.055	0.878913	0.312615	0.00493133	0.0431904	chr2L	4577718	4578218	HP6	FBgn0031613	657	2
289	chr3L	6126546	6126819	274	Peak_5988	103.35	0.876181	0.332927	0.00849458	0.0630985	chr3L	6126089	6126693	Lcp65Ag2	FBgn0020637	0	1
	chr3L	6126546	6126819	274	Peak_5988	103.35	0.876181	0.332927	0.00849458	0.0630985	chr3L	6127796	6128374	Lcp65Ag1	FBgn0020638	978	1
290	chr2L	14672530	14672889	360	Peak_1753	116.532	0.8755	0.33269	0.00849883	0.0630985	chr2L	14599195	14689340	osp	FBgn0003016	0	3
	chr2L	14672530	14672889	360	Peak_1753	116.532	0.8755	0.33269	0.00849883	0.0630985	chr2L	14712470	14713118	CG15282	FBgn0028855	39582	1
291	chr2R	2442602	2443017	416	Peak_2668	127.874	0.874178	0.293828	0.00292859	0.0296764	chr2R	2389510	2506887	jing	FBgn0086655	0	2
	chr2R	2442602	2443017	416	Peak_2668	127.874	0.874178	0.293828	0.00292859	0.0296764	chr2R	2487548	2488483	CG15233	FBgn0033076	44532	2
292	chr2R	14582584	14582938	355	Peak_4328	129.716	0.873232	0.289856	0.00258985	0.0273542	chr2R	14575636	14593310	Sik3	FBgn0262103	0	1
	chr2R	14582584	14582938	355	Peak_4328	129.716	0.873232	0.289856	0.00258985	0.0273542	chr2R	14584089	14584850	CG15071	FBgn0034377	1152	1
293	chr3L	22411020	22411590	571	Peak_8120	223.611	0.872929	0.312818	0.00526215	0.045111	chr3L	22286143	22400963	Ten-m	FBgn0004449	-10058	1
	chr3L	22411020	22411590	571	Peak_8120	223.611	0.872929	0.312818	0.00526215	0.045111	chr3L	22447472	22449089	CG11449	FBgn0037162	35883	1
294	chr2R	17738686	17739846	1161	Peak_4716	216.551	0.872757	0.356275	0.0142986	0.0901941	chr2R	17748329	17749499	CG9294	FBgn0034666	8484	1
	chr2R	17738686	17739846	1161	Peak_4716	216.551	0.872757	0.356275	0.0142986	0.0901941	chr2R	17725109	17726303	CG4372	FBgn0034665	-12384	1
295	chr3L	6372671	6373225	555	Peak_6033	138.994	0.871823	0.335772	0.00941856	0.0676493	chr3L	6393689	6479064	CG42747	FBgn0261801	20465	2
	chr3L	6372671	6373225	555	Peak_6033	138.994	0.871823	0.335772	0.00941856	0.0676493	chr3L	6322423	6345490	CG13300	FBgn0035699	-27182	4
296	chr3L	20223397	20223943	547	Peak_7813	398.797	0.871565	0.277101	0.00165922	0.0200811	chr3L	20219480	20223350	Su(var)3-3	FBgn0260397	-48	1
	chr3L	20223397	20223943	547	Peak_7813	398.797	0.871565	0.277101	0.00165922	0.0200811	chr3L	20224768	20226355	CG13813	FBgn0036956	826	1
297	chrX	14733722	14734590	869	Peak_13294	464.063	0.871022	0.249122	0.000471643	0.00788079	chrX	14733408	14827616	Flo2	FBgn0264078	0	1
	chrX	14733722	14734590	869	Peak_13294	464.063	0.871022	0.249122	0.000471643	0.00788079	chrX	14732384	14733139	CG32590	FBgn0052590	-584	1
298	chr3L	19769197	19769586	390	Peak_7765	117.881	0.868728	0.295977	0.00333419	0.0326026	chr3L	19744042	19786669	CG42637	FBgn0261360	0	1
	chr3L	19769197	19769586	390	Peak_7765	117.881	0.868728	0.295977	0.00333419	0.0326026	chr3L	19787034	19792079	SREBP	FBgn0261283	17449	1
299	chr3R	9924311	9924678	368	Peak_9401	148.258	0.868071	0.30002	0.00381121	0.035869	chr3R	9923014	9923802	CG9920	FBgn0038200	-510	1
	chr3R	9924311	9924678	368	Peak_9401	148.258	0.868071	0.30002	0.00381121	0.035869	chr3R	9925553	9928844	PK1-R	FBgn0038201	876	1
300	chr3L	7828218	7828642	425	Peak_6185	158.116	0.867884	0.276966	0.00172712	0.0206728	chr3L	7804557	7848648	Pdp1	FBgn0016694	0	2
	chr3L	7828218	7828642	425	Peak_6185	158.116	0.867884	0.276966	0.00172712	0.0206728	chr3L	7770204	7802925	CG32369	FBgn0052369	-25294	1
301	chr3R	5765687	5766140	454	Peak_8943	96.345	0.867611	0.32512	0.00761717	0.0587112	chr3R	5700402	5814598	Glut4EF	FBgn0267336	0	3
	chr3R	5765687	5766140	454	Peak_8943	96.345	0.867611	0.32512	0.00761717	0.0587112	chr3R	5808537	5811782	Art4	FBgn0037770	42398	1
302	chr2R	11251256	11251673	418	Peak_3890	109.68	0.866716	0.289399	0.00274549	0.0283908	chr2R	11227976	11255805	unc-5	FBgn0034013	0	1
	chr2R	11251256	11251673	418	Peak_3890	109.68	0.866716	0.289399	0.00274549	0.0283908	chr2R	11255578	11259025	Pms2	FBgn0011660	3906	1
303	chr3L	17589987	17590384	398	Peak_7482	183.498	0.866712	0.313508	0.00569993	0.0475612	chr3L	17551771	17569420	Eip74EF	FBgn0000567	-20568	1
	chr3L	17589987	17590384	398	Peak_7482	183.498	0.866712	0.313508	0.00569993	0.0475612	chr3L	17613222	17614725	Vps60	FBgn0036740	22839	2
304	chrX	2429243	2429822	580	Peak_11897	225.442	0.866085	0.331242	0.00893156	0.0653188	chrX	2364492	2439443	trol	FBgn0284408	0	2
	chrX	2429243	2429822	580	Peak_11897	225.442	0.866085	0.331242	0.00893156	0.0653188	chrX	2438772	2438941	mir-4955	FBgn0263531	8951	2
305	chr3R	19599543	19600085	543	Peak_10534	226.035	0.864987	0.294958	0.00336161	0.0326596	chr3R	19598719	19599849	CG10208	FBgn0039118	0	1
	chr3R	19599543	19600085	543	Peak_10534	226.035	0.864987	0.294958	0.00336161	0.0326596	chr3R	19599946	19607131	Nup98-96	FBgn0039120	0	2
306	chr3L	4446258	4446495	238	Peak_5852	82.2571	0.863862	0.344671	0.0121989	0.0806118	chr3L	4446572	4448072	CG12607	FBgn0035545	78	1
	chr3L	4446258	4446495	238	Peak_5852	82.2571	0.863862	0.344671	0.0121989	0.0806118	chr3L	4436720	4438311	CG15021	FBgn0035544	-7948	1
307	chr3L	17850248	17850763	516	Peak_7511	227.694	0.862812	0.336424	0.0103277	0.072024	chr3L	17851573	17853582	CG34002	FBgn0054002	811	1
	chr3L	17850248	17850763	516	Peak_7511	227.694	0.862812	0.336424	0.0103277	0.072024	chr3L	17845723	17848788	CG5535	FBgn0036764	-1461	1
308	chr2R	19677351	19677712	362	Peak_4963	83.0672	0.862627	0.358267	0.01605	0.0975418	chr2R	19640999	19685918	sona	FBgn0034903	0	1
	chr2R	19677351	19677712	362	Peak_4963	83.0672	0.862627	0.358267	0.01605	0.0975418	chr2R	19678136	19678750	CG15800	FBgn0034904	425	1
309	chr3L	3777013	3777233	221	Peak_5746	60.3877	0.860661	0.341698	0.0117763	0.0790827	chr3L	3714825	3806459	CG32264	FBgn0052264	0	1
	chr3L	3777013	3777233	221	Peak_5746	60.3877	0.860661	0.341698	0.0117763	0.0790827	chr3L	3790803	3791560	CG32266	FBgn0052266	13571	1
310	chrX	18153432	18153833	402	Peak_13723	102.87	0.860513	0.336765	0.0106118	0.0735696	chrX	18152583	18153550	CG15059	FBgn0030905	0	2
	chrX	18153432	18153833	402	Peak_13723	102.87	0.860513	0.336765	0.0106118	0.0735696	chrX	18134686	18137317	upd2	FBgn0030904	-16116	1
311	chr3R	10533658	10533971	314	Peak_9479	100.72	0.859596	0.328141	0.00880349	0.0645467	chr3R	10523410	10549983	kibra	FBgn0262127	0	3
	chr3R	10533658	10533971	314	Peak_9479	100.72	0.859596	0.328141	0.00880349	0.0645467	chr3R	10490628	10523014	Meltrin	FBgn0265140	-10645	3
312	chr3R	14306003	14307755	1753	Peak_9933	1150.5	0.859587	0.262374	0.00105216	0.0145818	chr3R	14239994	14371308	fru	FBgn0004652	0	8
	chr3R	14306003	14307755	1753	Peak_9933	1150.5	0.859587	0.262374	0.00105216	0.0145818	chr3R	14235801	14237353	CG10864	FBgn0038621	-68651	8
313	chr3R	9829505	9830163	659	Peak_9381	329.057	0.858205	0.310919	0.00577617	0.0479741	chr3R	9854949	9857205	Cyp6d5	FBgn0038194	24787	4
	chr3R	9829505	9830163	659	Peak_9381	329.057	0.858205	0.310919	0.00577617	0.0479741	chr3R	9858092	9860763	CG3061	FBgn0038195	27930	4
314	chr3R	14292559	14292970	412	Peak_9927	121.972	0.857932	0.355233	0.0157299	0.0962689	chr3R	14239994	14371308	fru	FBgn0004652	0	8
	chr3R	14292559	14292970	412	Peak_9927	121.972	0.857932	0.355233	0.0157299	0.0962689	chr3R	14235801	14237353	CG10864	FBgn0038621	-55207	8
315	chr2L	7518102	7518685	584	Peak_916	188.065	0.857781	0.288491	0.00294583	0.0297716	chr2L	7497804	7578980	RapGAP1	FBgn0264895	0	1
	chr2L	7518102	7518685	584	Peak_916	188.065	0.857781	0.288491	0.00294583	0.0297716	chr2L	7496790	7497365	Obp28a	FBgn0011283	-20738	1
316	chr2L	520957	521356	400	Peak_90	149.869	0.855246	0.283774	0.00257977	0.0273267	chr2L	476219	540532	ush	FBgn0003963	0	4
	chr2L	520957	521356	400	Peak_90	149.869	0.855246	0.283774	0.00257977	0.0273267	chr2L	540598	542580	lwr	FBgn0010602	19243	3
317	chr2L	7075964	7076727	764	Peak_851	252.721	0.854404	0.334575	0.0106584	0.0737711	chr2L	7069535	7084635	Pvf2	FBgn0031888	0	1
	chr2L	7075964	7076727	764	Peak_851	252.721	0.854404	0.334575	0.0106584	0.0737711	chr2L	7067982	7069546	CG11289	FBgn0031887	-6419	1
318	chr3R	27150189	27150749	561	Peak_11360	155.464	0.854366	0.342709	0.0126677	0.0829796	chr3R	27136878	27197470	CG34347	FBgn0085376	0	1
	chr3R	27150189	27150749	561	Peak_11360	155.464	0.854366	0.342709	0.0126677	0.0829796	chr3R	27126639	27131106	pHCl-2	FBgn0039840	-19084	1
319	chrX	12165576	12166484	909	Peak_13029	279.413	0.853531	0.233266	0.000253149	0.00493573	chrX	11937730	12226198	Ten-a	FBgn0267001	0	3
	chrX	12165576	12166484	909	Peak_13029	279.413	0.853531	0.233266	0.000253149	0.00493573	chrX	12168667	12169188	CG45603	FBgn0267163	2184	1
320	chr2R	21015844	21016144	301	Peak_5177	81.1843	0.853293	0.355074	0.0162548	0.0982378	chr2R	21016954	21017508	CG30430	FBgn0050430	811	1
	chr2R	21015844	21016144	301	Peak_5177	81.1843	0.853293	0.355074	0.0162548	0.0982378	chr2R	21026149	21027150	CG43106	FBgn0262566	10006	1
321	chr2R	15995131	15995543	413	Peak_4495	100.693	0.851956	0.319374	0.00763995	0.0587906	chr2R	15999015	16004437	18w	FBgn0004364	3473	2
	chr2R	15995131	15995543	413	Peak_4495	100.693	0.851956	0.319374	0.00763995	0.0587906	chr2R	16033622	16034329	CG11041	FBgn0034481	38080	3
322	chrX	14011416	14011903	488	Peak_13244	146.079	0.851632	0.260493	0.0010781	0.0147962	chrX	14045611	14046039	CG12479	FBgn0040871	33709	1
	chrX	14011416	14011903	488	Peak_13244	146.079	0.851632	0.260493	0.0010781	0.0147962	chrX	14063624	14065578	CG12480	FBgn0030537	51722	1
323	chr2L	16612613	16613445	833	Peak_1914	343.701	0.850965	0.278599	0.0022548	0.0248626	chr2L	16545015	16662012	CG42389	FBgn0259735	0	1
	chr2L	16612613	16613445	833	Peak_1914	343.701	0.850965	0.278599	0.0022548	0.0248626	chr2L	16607369	16610037	CG4631	FBgn0032590	-2577	1
324	chr2L	8171548	8172009	462	Peak_1000	132.775	0.848859	0.270616	0.0017082	0.0204811	chr2L	8163072	8190137	Piezo	FBgn0264953	0	1
	chr2L	8171548	8172009	462	Peak_1000	132.775	0.848859	0.270616	0.0017082	0.0204811	chr2L	8161795	8162452	CG8498	FBgn0031992	-9097	1
325	chrX	19191036	19191450	415	Peak_13869	199.838	0.848662	0.254992	0.000874133	0.0125721	chrX	19175264	19192195	CG8034	FBgn0031011	0	1
	chrX	19191036	19191450	415	Peak_13869	199.838	0.848662	0.254992	0.000874133	0.0125721	chrX	19195362	19198127	CG8051	FBgn0031012	3913	1
326	chr3R	15094418	15094922	505	Peak_10022	267.373	0.848082	0.27489	0.00203435	0.0231543	chr3R	15082498	15085854	CG14280	FBgn0038695	-8565	2
	chr3R	15094418	15094922	505	Peak_10022	267.373	0.848082	0.27489	0.00203435	0.0231543	chr3R	15072773	15073858	CG5217	FBgn0038694	-20561	1
327	chr3R	276955	277352	398	Peak_8229	121.131	0.847624	0.245819	0.000564412	0.00901528	chr3R	267136	288605	CG31522	FBgn0051522	0	1
	chr3R	276955	277352	398	Peak_8229	121.131	0.847624	0.245819	0.000564412	0.00901528	chr3R	263108	267050	CG14650	FBgn0037252	-9906	1
328	chr2R	11672688	11673113	426	Peak_3933	123.755	0.845995	0.28144	0.00264752	0.027743	chr2R	11650069	11702422	Zasp52	FBgn0265991	0	1
	chr2R	11672688	11673113	426	Peak_3933	123.755	0.845995	0.28144	0.00264752	0.027743	chr2R	11681504	11741094	tun	FBgn0034046	8392	1
329	chr3L	4388080	4388979	900	Peak_5842	301.84	0.845014	0.310044	0.00642117	0.0519277	chr3L	4384441	4403181	slow	FBgn0035539	0	1
	chr3L	4388080	4388979	900	Peak_5842	301.84	0.845014	0.310044	0.00642117	0.0519277	chr3L	4380863	4381629	CG32240	FBgn0052240	-6452	1
330	chr2R	15873527	15874603	1077	Peak_4475	348.738	0.844334	0.264101	0.00138861	0.0178287	chr2R	15866746	15872255	CG8654	FBgn0034479	-1273	1
	chr2R	15873527	15874603	1077	Peak_4475	348.738	0.844334	0.264101	0.00138861	0.0178287	chr2R	15891124	15892508	CG16898	FBgn0034480	16522	1
331	chr3R	21469571	21469924	354	Peak_10770	132.94	0.844211	0.33085	0.0107217	0.0738462	chr3R	21463564	21476119	jigr1	FBgn0039350	0	2
	chr3R	21469571	21469924	354	Peak_10770	132.94	0.844211	0.33085	0.0107217	0.0738462	chr3R	21472227	21472322	mir-92a	FBgn0262411	2304	2
332	chrX	11455525	11456083	559	Peak_12948	159.945	0.842613	0.271093	0.00188228	0.0220081	chrX	11455675	11456812	PGRP-SA	FBgn0030310	0	1
	chrX	11455525	11456083	559	Peak_12948	159.945	0.842613	0.271093	0.00188228	0.0220081	chrX	11456832	11464359	RpII215	FBgn0003277	750	1
333	chr2R	20849119	20849574	456	Peak_5147	168.053	0.842148	0.292381	0.00397281	0.0369471	chr2R	20847363	20850771	CG2765	FBgn0035087	0	1
	chr2R	20849119	20849574	456	Peak_5147	168.053	0.842148	0.292381	0.00397281	0.0369471	chr2R	20852797	20854821	CG30424	FBgn0050424	3224	1
334	chr3R	10383616	10384246	631	Peak_9458	214.804	0.841831	0.274937	0.00219937	0.0244229	chr3R	10384887	10385776	CG14854	FBgn0038238	642	1
	chr3R	10383616	10384246	631	Peak_9458	214.804	0.841831	0.274937	0.00219937	0.0244229	chr3R	10339622	10381820	Pde6	FBgn0038237	-1797	1
335	chrX	4308540	4308880	341	Peak_12129	128.626	0.841527	0.301375	0.00523365	0.045084	chrX	4306888	4378485	bi	FBgn0000179	0	3
	chrX	4308540	4308880	341	Peak_12129	128.626	0.841527	0.301375	0.00523365	0.045084	chrX	4274790	4276499	CG12688	FBgn0029707	-32042	1
336	chr3R	17453280	17454110	831	Peak_10283	337.997	0.841433	0.273146	0.00206641	0.0233313	chr3R	17446025	17458795	E2f1	FBgn0011766	0	1
	chr3R	17453280	17454110	831	Peak_10283	337.997	0.841433	0.273146	0.00206641	0.0233313	chr3R	17448218	17448293	mir-11	FBgn0262434	-4988	1
337	chr3L	21948027	21948411	385	Peak_8065	172.859	0.841421	0.278648	0.00253061	0.0269584	chr3L	21948209	21951141	CG7458	FBgn0037144	0	1
	chr3L	21948027	21948411	385	Peak_8065	172.859	0.841421	0.278648	0.00253061	0.0269584	chr3L	21935320	21942966	CG14562	FBgn0037142	-5062	1
338	chrX	17606975	17607411	437	Peak_13660	221.406	0.841331	0.286706	0.0033411	0.0326369	chrX	17604176	17645718	CG42684	FBgn0261570	0	1
	chrX	17606975	17607411	437	Peak_13660	221.406	0.841331	0.286706	0.0033411	0.0326369	chrX	17601433	17603686	CG8173	FBgn0030864	-3290	1
339	chr3R	14262505	14262949	445	Peak_9919	178.623	0.840497	0.249572	0.000757818	0.0112173	chr3R	14239994	14371308	fru	FBgn0004652	0	8
	chr3R	14262505	14262949	445	Peak_9919	178.623	0.840497	0.249572	0.000757818	0.0112173	chr3R	14235801	14237353	CG10864	FBgn0038621	-25153	8
340	chr2L	512572	513338	767	Peak_87	289.334	0.837079	0.271246	0.00202832	0.0231228	chr2L	476219	540532	ush	FBgn0003963	0	4
	chr2L	512572	513338	767	Peak_87	289.334	0.837079	0.271246	0.00202832	0.0231228	chr2L	540598	542580	lwr	FBgn0010602	27261	3
341	chr2L	4626921	4627999	1079	Peak_561	426.044	0.83598	0.277079	0.00255192	0.0270623	chr2L	4641295	4642747	BG642163	FBgn0083938	13297	1
	chr2L	4626921	4627999	1079	Peak_561	426.044	0.83598	0.277079	0.00255192	0.0270623	chr2L	4642971	4646562	CG15635	FBgn0031617	14973	1
342	chrX	12507112	12507519	408	Peak_13048	123.955	0.834255	0.335053	0.0127772	0.0835426	chrX	12505899	12509563	CG2543	FBgn0030407	0	1
	chrX	12507112	12507519	408	Peak_13048	123.955	0.834255	0.335053	0.0127772	0.0835426	chrX	12504009	12505641	CG1463	FBgn0030406	-1472	1
343	chr2R	14160726	14161154	429	Peak_4250	135.476	0.833534	0.288347	0.00384342	0.0360096	chr2R	14163111	14164682	Ote	FBgn0266420	1958	1
	chr2R	14160726	14161154	429	Peak_4250	135.476	0.833534	0.288347	0.00384342	0.0360096	chr2R	14164943	14166267	pen-2	FBgn0053198	3790	1
344	chr3L	6366644	6367087	444	Peak_6030	126.511	0.832966	0.31771	0.00874719	0.0643677	chr3L	6322423	6345490	CG13300	FBgn0035699	-21155	4
	chr3L	6366644	6367087	444	Peak_6030	126.511	0.832966	0.31771	0.00874719	0.0643677	chr3L	6343375	6343929	Sfp65A	FBgn0259969	-22716	2
345	chr2R	18196134	18196475	342	Peak_4770	121.1	0.831569	0.291042	0.00427383	0.038827	chr2R	18185718	18188928	wdp	FBgn0034718	-7207	1
	chr2R	18196134	18196475	342	Peak_4770	121.1	0.831569	0.291042	0.00427383	0.038827	chr2R	18205166	18216921	Gp150	FBgn0013272	8692	1
346	chrX	9390961	9391656	696	Peak_12730	890.398	0.830883	0.26356	0.00161856	0.0198267	chrX	9252528	9394162	mgl	FBgn0261260	0	4
	chrX	9390961	9391656	696	Peak_12730	890.398	0.830883	0.26356	0.00161856	0.0198267	chrX	9396858	9444871	CG32700	FBgn0267253	5203	3
347	chr3R	20688078	20688801	724	Peak_10676	226.433	0.830252	0.257731	0.00127568	0.016775	chr3R	20688652	20689938	CG7016	FBgn0039238	0	1
	chr3R	20688078	20688801	724	Peak_10676	226.433	0.830252	0.257731	0.00127568	0.016775	chr3R	20687380	20687887	CG13640	FBgn0039237	-192	1
348	chr3R	4538855	4539475	621	Peak_8752	176.732	0.829895	0.281292	0.00317463	0.0314261	chr3R	4538627	4541601	Cks85A	FBgn0037613	0	1
	chr3R	4538855	4539475	621	Peak_8752	176.732	0.829895	0.281292	0.00317463	0.0314261	chr3R	4538654	4540985	CG8112	FBgn0037612	0	1
349	chrX	16419606	16420622	1017	Peak_13494	476.878	0.829277	0.235822	0.000437216	0.00744637	chrX	16349059	16421600	para	FBgn0285944	0	2
	chrX	16419606	16420622	1017	Peak_13494	476.878	0.829277	0.235822	0.000437216	0.00744637	chrX	16416999	16419448	Cnx14D	FBgn0264077	-159	2
350	chr3L	13250622	13251146	525	Peak_6932	150.349	0.829234	0.339753	0.014659	0.0914879	chr3L	13221791	13272742	caps	FBgn0023095	0	2
	chr3L	13250622	13251146	525	Peak_6932	150.349	0.829234	0.339753	0.014659	0.0914879	chr3L	13239963	13241802	CG32119	FBgn0052119	-8821	2
351	chr3R	17417690	17418017	328	Peak_10267	164.429	0.828053	0.272191	0.00234876	0.0255991	chr3R	17395969	17444758	InR	FBgn0283499	0	1
	chr3R	17417690	17418017	328	Peak_10267	164.429	0.828053	0.272191	0.00234876	0.0255991	chr3R	17393240	17394871	CG15498	FBgn0038892	-22820	2
352	chr3R	13429444	13429795	352	Peak_9830	132.191	0.827981	0.310252	0.00761375	0.0587112	chr3R	13431827	13434263	sll	FBgn0038524	2033	1
	chr3R	13429444	13429795	352	Peak_9830	132.191	0.827981	0.310252	0.00761375	0.0587112	chr3R	13435080	13436255	CG14329	FBgn0038525	5286	1
353	chr2R	5324872	5325353	482	Peak_3072	163.935	0.826223	0.255567	0.00122542	0.0162196	chr2R	5322173	5329071	ced-6	FBgn0029092	0	1
	chr2R	5324872	5325353	482	Peak_3072	163.935	0.826223	0.255567	0.00122542	0.0162196	chr2R	5313943	5322143	Pdk	FBgn0017558	-2730	1
354	chrX	3246539	3246784	246	Peak_12001	66.4877	0.82613	0.292084	0.00467812	0.0415535	chrX	3070472	3237800	dnc	FBgn0000479	-8740	1
	chrX	3246539	3246784	246	Peak_12001	66.4877	0.82613	0.292084	0.00467812	0.0415535	chrX	3267191	3280044	Myc	FBgn0262656	20408	3
355	chrX	9581756	9582103	348	Peak_12755	140.17	0.825387	0.293692	0.00494822	0.0432847	chrX	9559474	9581099	nej	FBgn0261617	-658	1
	chrX	9581756	9582103	348	Peak_12755	140.17	0.825387	0.293692	0.00494822	0.0432847	chrX	9588218	9591591	btd	FBgn0000233	6116	2
356	chrX	16858027	16858436	410	Peak_13563	141.567	0.824501	0.227666	0.000292856	0.00551241	chrX	16850264	16862712	Ubr1	FBgn0030809	0	1
	chrX	16858027	16858436	410	Peak_13563	141.567	0.824501	0.227666	0.000292856	0.00551241	chrX	16863101	16926738	CG45002	FBgn0266354	4666	1
357	chr3R	4569423	4569995	573	Peak_8757	187.878	0.824409	0.331687	0.012937	0.0842752	chr3R	4561600	4573397	CG9801	FBgn0037623	0	1
	chr3R	4569423	4569995	573	Peak_8757	187.878	0.824409	0.331687	0.012937	0.0842752	chr3R	4573519	4579826	CG8223	FBgn0037624	3525	1
358	chr2L	19145879	19147138	1260	Peak_2140	585.527	0.824236	0.250434	0.000997511	0.0138924	chr2L	19133815	19171852	brat	FBgn0010300	0	2
	chr2L	19145879	19147138	1260	Peak_2140	585.527	0.824236	0.250434	0.000997511	0.0138924	chr2L	19133022	19135233	l(2)37Cg	FBgn0086447	-10647	2
359	chrX	6754127	6755008	882	Peak_12414	551.805	0.823918	0.21778	0.000154785	0.00346644	chrX	6757920	6770223	CG43736	FBgn0263993	2913	3
	chrX	6754127	6755008	882	Peak_12414	551.805	0.823918	0.21778	0.000154785	0.00346644	chrX	6745941	6746671	CG14434	FBgn0029915	-7457	4
360	chr2R	14492767	14493072	306	Peak_4306	96.2297	0.823823	0.342077	0.016027	0.0974442	chr2R	14499149	14500235	CG42697	FBgn0261587	6078	1
	chr2R	14492767	14493072	306	Peak_4306	96.2297	0.823823	0.342077	0.016027	0.0974442	chr2R	14500594	14501760	CG10927	FBgn0034360	7523	1
361	chr2R	6741371	6741823	453	Peak_3261	299.954	0.823305	0.228975	0.000323636	0.00595454	chr2R	6726606	6731532	CG30015	FBgn0050015	-9840	1
	chr2R	6741371	6741823	453	Peak_3261	299.954	0.823305	0.228975	0.000323636	0.00595454	chr2R	6724074	6726232	LTV1	FBgn0027525	-15140	1
362	chr2L	11038048	11038581	534	Peak_1324	228.236	0.821194	0.297489	0.0057727	0.0479741	chr2L	11013205	11066998	Samuel	FBgn0032330	0	1
	chr2L	11038048	11038581	534	Peak_1324	228.236	0.821194	0.297489	0.0057727	0.0479741	chr2L	11034794	11035308	CG18666	FBgn0040967	-2741	1
363	chr2R	10769436	10769763	328	Peak_3821	122.44	0.819888	0.271029	0.00248556	0.0267372	chr2R	10769622	10771551	Cyp6a20	FBgn0033980	0	1
	chr2R	10769436	10769763	328	Peak_3821	122.44	0.819888	0.271029	0.00248556	0.0267372	chr2R	10766860	10768877	Cyp6a9	FBgn0013771	-560	1
364	chr2R	6416011	6416355	345	Peak_3209	126.099	0.819144	0.278162	0.0032312	0.0318302	chr2R	6369398	6429175	lola	FBgn0283521	0	2
	chr2R	6416011	6416355	345	Peak_3209	126.099	0.819144	0.278162	0.0032312	0.0318302	chr2R	6423999	6424165	snoRNA:lola-a	FBgn0263466	7645	2
365	chr3R	10576848	10577104	257	Peak_9495	83.3397	0.817048	0.300188	0.00649299	0.0522284	chr3R	10567303	10619457	jvl	FBgn0263929	0	1
	chr3R	10576848	10577104	257	Peak_9495	83.3397	0.817048	0.300188	0.00649299	0.0522284	chr3R	10577469	10580182	CG7362	FBgn0038258	366	1
366	chr2R	11545302	11545730	429	Peak_3920	143.22	0.816882	0.305516	0.00750027	0.0581271	chr2R	11544822	11563458	fus	FBgn0023441	0	2
	chr2R	11545302	11545730	429	Peak_3920	143.22	0.816882	0.305516	0.00750027	0.0581271	chr2R	11544570	11544668	mir-278	FBgn0262403	-635	2
367	chr3R	19271480	19271889	410	Peak_10501	140.426	0.816238	0.307568	0.00795808	0.0604165	chr3R	19234405	19298000	CG4374	FBgn0039078	0	1
	chr3R	19271480	19271889	410	Peak_10501	140.426	0.816238	0.307568	0.00795808	0.0604165	chr3R	19251323	19251751	CG43694	FBgn0263777	-19730	1
368	chr3R	12050132	12050681	550	Peak_9662	275.07	0.816174	0.218881	0.000192352	0.00404627	chr3R	12051372	12086051	tara	FBgn0040071	692	6
	chr3R	12050132	12050681	550	Peak_9662	275.07	0.816174	0.218881	0.000192352	0.00404627	chr3R	12029915	12030972	mtSSB	FBgn0010438	-19161	6
369	chr2R	10763262	10763485	224	Peak_3820	90.0553	0.815518	0.330351	0.0135626	0.0867909	chr2R	10763333	10765159	Cyp6a23	FBgn0033978	0	1
	chr2R	10763262	10763485	224	Peak_3820	90.0553	0.815518	0.330351	0.0135626	0.0867909	chr2R	10761457	10763244	Cyp6a17	FBgn0015714	-19	1
370	chr3R	23567066	23567577	512	Peak_10989	185.508	0.81465	0.305333	0.00762879	0.0587687	chr3R	23562259	23574088	Ets98B	FBgn0005659	0	1
	chr3R	23567066	23567577	512	Peak_10989	185.508	0.81465	0.305333	0.00762879	0.0587687	chr3R	23593687	23731565	CG34353	FBgn0085382	26111	1
371	chrX	614444	614752	309	Peak_11637	104.077	0.814074	0.290548	0.00508098	0.044161	chrX	580866	643529	sdk	FBgn0021764	0	2
	chrX	614444	614752	309	Peak_11637	104.077	0.814074	0.290548	0.00508098	0.044161	chrX	643273	645334	CG13362	FBgn0029531	28522	1
372	chr3L	21272907	21273527	621	Peak_7967	250.614	0.813388	0.232672	0.00047253	0.00788629	chr3L	21263821	21273343	AcCoAS	FBgn0012034	0	1
	chr3L	21272907	21273527	621	Peak_7967	250.614	0.813388	0.232672	0.00047253	0.00788629	chr3L	21273590	21274606	ppl	FBgn0027945	64	1
373	chr3L	16473551	16473996	446	Peak_7329	159.615	0.811985	0.224609	0.000300227	0.0056212	chr3L	16412696	16489660	CG33158	FBgn0053158	0	2
	chr3L	16473551	16473996	446	Peak_7329	159.615	0.811985	0.224609	0.000300227	0.0056212	chr3L	16463485	16476750	aos	FBgn0004569	0	2
374	chr2R	3869756	3870183	428	Peak_2875	135.102	0.811939	0.312104	0.00928164	0.0670434	chr2R	3861619	3871568	ACC	FBgn0033246	0	1
	chr2R	3869756	3870183	428	Peak_2875	135.102	0.811939	0.312104	0.00928164	0.0670434	chr2R	3875966	3878788	Nup44A	FBgn0033247	5784	1
375	chr2R	6079794	6080145	352	Peak_3175	110.143	0.811816	0.272257	0.00286561	0.0293413	chr2R	6033401	6079899	KCNQ	FBgn0033494	0	1
	chr2R	6079794	6080145	352	Peak_3175	110.143	0.811816	0.272257	0.00286561	0.0293413	chr2R	6084640	6087216	CG34221	FBgn0085250	4496	1
376	chr3L	14056194	14056423	230	Peak_6997	116.522	0.811756	0.306206	0.00802504	0.0607942	chr3L	14046314	14064683	Frl	FBgn0267795	0	3
	chr3L	14056194	14056423	230	Peak_6997	116.522	0.811756	0.306206	0.00802504	0.0607942	chr3L	14064991	14069223	Pex1	FBgn0013563	8569	2
377	chr3L	12546515	12547384	870	Peak_6821	492.449	0.811749	0.315813	0.0101597	0.0713098	chr3L	12530612	12565642	sowah	FBgn0036302	0	1
	chr3L	12546515	12547384	870	Peak_6821	492.449	0.811749	0.315813	0.0101597	0.0713098	chr3L	12528525	12530415	CG4069	FBgn0036301	-16101	1
378	chr2L	20320284	20320704	421	Peak_2270	125.786	0.810786	0.315124	0.0100848	0.0708923	chr2L	20311218	20348386	spir	FBgn0003475	0	2
	chr2L	20320284	20320704	421	Peak_2270	125.786	0.810786	0.315124	0.0100848	0.0708923	chr2L	20294692	20295351	CG12617	FBgn0040996	-24934	1
379	chr3R	9230323	9231517	1195	Peak_9300	350.369	0.808264	0.256552	0.00162995	0.0198905	chr3R	9229144	9230592	yellow-e3	FBgn0038150	0	1
	chr3R	9230323	9231517	1195	Peak_9300	350.369	0.808264	0.256552	0.00162995	0.0198905	chr3R	9230830	9232720	yellow-e2	FBgn0038151	0	1
380	chrX	8349077	8349763	687	Peak_12602	228.636	0.805984	0.275769	0.00347036	0.0334632	chrX	8341723	8349102	org-1	FBgn0021767	0	1
	chrX	8349077	8349763	687	Peak_12602	228.636	0.805984	0.275769	0.00347036	0.0334632	chrX	8350869	8351665	CG32713	FBgn0052713	1107	1
381	chr3R	25111992	25112409	418	Peak_11110	151.777	0.805923	0.334294	0.0159165	0.0970485	chr3R	25119464	25122902	CG14506	FBgn0039659	7056	1
	chr3R	25111992	25112409	418	Peak_11110	151.777	0.805923	0.334294	0.0159165	0.0970485	chr3R	25140975	25145320	Cnx99A	FBgn0015622	28567	1
382	chrX	17419634	17420128	495	Peak_13626	159.864	0.80581	0.28319	0.00443447	0.0398511	chrX	17350201	17401122	CG43658	FBgn0263706	-18513	1
	chrX	17419634	17420128	495	Peak_13626	159.864	0.80581	0.28319	0.00443447	0.0398511	chrX	17460584	17463261	ppk23	FBgn0030844	40457	2
383	chrX	5904410	5905146	737	Peak_12299	298.017	0.805373	0.315409	0.010667	0.0737711	chrX	5902215	5907214	mab-21	FBgn0029003	0	2
	chrX	5904410	5905146	737	Peak_12299	298.017	0.805373	0.315409	0.010667	0.0737711	chrX	5891540	5894830	CG4766	FBgn0027546	-9581	1
384	chrX	351109	352111	1003	Peak_11605	403.07	0.80516	0.293596	0.00609898	0.0500379	chrX	354779	357209	ase	FBgn0000137	2669	1
	chrX	351109	352111	1003	Peak_11605	403.07	0.80516	0.293596	0.00609898	0.0500379	chrX	361089	363368	Cyp4g1	FBgn0010019	8979	1
385	chr2L	8844704	8845040	337	Peak_1086	103.385	0.804681	0.292428	0.00592826	0.0489783	chr2L	8825644	8829670	SoxN	FBgn0029123	-15035	1
	chr2L	8844704	8845040	337	Peak_1086	103.385	0.804681	0.292428	0.00592826	0.0489783	chr2L	8862775	8863743	CG32986	FBgn0052986	17736	2
386	chr3R	2791142	2791532	391	Peak_8548	173.066	0.804117	0.26032	0.00200864	0.0229912	chr3R	2721974	2824950	Antp	FBgn0260642	0	3
	chr3R	2791142	2791532	391	Peak_8548	173.066	0.804117	0.26032	0.00200864	0.0229912	chr3R	2878056	2880263	Sodh-1	FBgn0024289	86525	2
387	chr2R	16158192	16158966	775	Peak_4530	292.982	0.803352	0.294599	0.00639252	0.0517849	chr2R	16152424	16158499	CG8908	FBgn0034493	0	1
	chr2R	16158192	16158966	775	Peak_4530	292.982	0.803352	0.294599	0.00639252	0.0517849	chr2R	16159157	16162004	CG10444	FBgn0034494	192	1
388	chrX	81680	82095	416	Peak_11572	239.621	0.802755	0.26527	0.00247663	0.0266638	chrX	38594	96465	tyn	FBgn0284435	0	2
	chrX	81680	82095	416	Peak_11572	239.621	0.802755	0.26527	0.00247663	0.0266638	chrX	39117	44813	CG17707	FBgn0025835	-36868	2
389	chr2L	8857664	8858268	605	Peak_1089	200.421	0.802541	0.309248	0.00945543	0.0678143	chr2L	8862775	8863743	CG32986	FBgn0052986	4508	2
	chr2L	8857664	8858268	605	Peak_1089	200.421	0.802541	0.309248	0.00945543	0.0678143	chr2L	8863810	8864847	CG32987	FBgn0052987	5543	1
390	chr3R	4716859	4717513	655	Peak_8783	231.674	0.801565	0.301782	0.00790489	0.0601742	chr3R	4760847	4764117	osk	FBgn0003015	43335	1
	chr3R	4716859	4717513	655	Peak_8783	231.674	0.801565	0.301782	0.00790489	0.0601742	chr3R	4652789	4672011	pyd	FBgn0262614	-44849	1
391	chr2R	14813746	14814693	948	Peak_4360	333.274	0.801482	0.303253	0.00821877	0.0619961	chr2R	14765895	14847005	sano	FBgn0034408	0	1
	chr2R	14813746	14814693	948	Peak_4360	333.274	0.801482	0.303253	0.00821877	0.0619961	chr2R	14796465	14799400	Vha100-3	FBgn0028669	-14347	1
392	chrX	2823540	2823958	419	Peak_11938	159.175	0.800418	0.330469	0.0154326	0.0951811	chrX	2634416	3026824	kirre	FBgn0028369	0	5
	chrX	2823540	2823958	419	Peak_11938	159.175	0.800418	0.330469	0.0154326	0.0951811	chrX	2823828	2826659	CG32793	FBgn0052793	0	1
393	chrX	18841088	18841491	404	Peak_13826	120.798	0.799071	0.319688	0.0124356	0.0818387	chrX	18824367	18922662	CG43759	FBgn0264090	0	4
	chrX	18841088	18841491	404	Peak_13826	120.798	0.799071	0.319688	0.0124356	0.0818387	chrX	18794442	18804091	CG7378	FBgn0030976	-36998	4
394	chrX	1992147	1992729	583	Peak_11825	154.511	0.798265	0.329575	0.015431	0.0951811	chrX	1988266	2007697	csw	FBgn0000382	0	2
	chrX	1992147	1992729	583	Peak_11825	154.511	0.798265	0.329575	0.015431	0.0951811	chrX	1995959	1996058	snoRNA:Me18S-C1024	FBgn0086043	3231	2
395	chr2R	12996111	12996774	664	Peak_4102	261.431	0.797499	0.285686	0.00524601	0.045111	chr2R	12996348	13001865	CG15611	FBgn0034194	0	1
	chr2R	12996111	12996774	664	Peak_4102	261.431	0.797499	0.285686	0.00524601	0.045111	chr2R	12987745	12995047	CG30456	FBgn0050456	-1065	1
396	chr3R	17387266	17387622	357	Peak_10262	107.237	0.797492	0.307075	0.00940245	0.0675714	chr3R	17374382	17382904	slou	FBgn0002941	-4363	1
	chr3R	17387266	17387622	357	Peak_10262	107.237	0.797492	0.307075	0.00940245	0.0675714	chr3R	17393240	17394871	CG15498	FBgn0038892	5619	2
397	chr2L	20704363	20704849	487	Peak_2298	117.543	0.797428	0.312352	0.0106805	0.0738284	chr2L	20683461	20714588	Hr38	FBgn0014859	0	1
	chr2L	20704363	20704849	487	Peak_2298	117.543	0.797428	0.312352	0.0106805	0.0738284	chr2L	20724208	20726551	CG9316	FBgn0032878	19360	1
398	chr3L	10543040	10543603	564	Peak_6502	238.887	0.797098	0.332154	0.0164048	0.0988192	chr3L	10474511	10584067	Rbfox1	FBgn0052062	0	1
	chr3L	10543040	10543603	564	Peak_6502	238.887	0.797098	0.332154	0.0164048	0.0988192	chr3L	10550122	10552182	CG6527	FBgn0036085	6520	1
399	chr2L	3585444	3585778	335	Peak_451	129.908	0.796376	0.291513	0.00629752	0.051162	chr2L	3587067	3587469	lncRNA:TS2	FBgn0284410	1290	1
	chr2L	3585444	3585778	335	Peak_451	129.908	0.796376	0.291513	0.00629752	0.051162	chr2L	3578012	3580769	sob	FBgn0004892	-4676	1
400	chr2R	3173158	3173660	503	Peak_2770	333.019	0.796062	0.305875	0.00925279	0.066904	chr2R	3170076	3188309	pwn	FBgn0003174	0	1
	chr2R	3173158	3173660	503	Peak_2770	333.019	0.796062	0.305875	0.00925279	0.066904	chr2R	3165971	3169060	Incenp	FBgn0260991	-4099	1
401	chrX	6768243	6768720	478	Peak_12421	193.785	0.795382	0.211109	0.000164803	0.00361747	chrX	6757920	6770223	CG43736	FBgn0263993	0	3
	chrX	6768243	6768720	478	Peak_12421	193.785	0.795382	0.211109	0.000164803	0.00361747	chrX	6745941	6746671	CG14434	FBgn0029915	-21573	4
402	chr2R	20637026	20637393	368	Peak_5107	132.286	0.795226	0.325331	0.0145111	0.090805	chr2R	20631271	20644499	Usp15-31	FBgn0050421	0	1
	chr2R	20637026	20637393	368	Peak_5107	132.286	0.795226	0.325331	0.0145111	0.090805	chr2R	20644900	20647989	spz6	FBgn0035056	7508	1
403	chr3R	14268920	14269303	384	Peak_9920	145.529	0.793053	0.291343	0.00648764	0.0522284	chr3R	14239994	14371308	fru	FBgn0004652	0	8
	chr3R	14268920	14269303	384	Peak_9920	145.529	0.793053	0.291343	0.00648764	0.0522284	chr3R	14235801	14237353	CG10864	FBgn0038621	-31568	8
404	chr2R	2020315	2021183	869	Peak_2609	326.981	0.79296	0.257297	0.00205691	0.0232426	chr2R	1975377	2019346	EcR	FBgn0000546	-970	1
	chr2R	2020315	2021183	869	Peak_2609	326.981	0.79296	0.257297	0.00205691	0.0232426	chr2R	2024807	2025916	CG14589	FBgn0033063	3625	1
405	chr2L	9082870	9083284	415	Peak_1107	169.525	0.792773	0.231596	0.000619142	0.0096178	chr2L	9084106	9089440	Toll-4	FBgn0032095	823	1
	chr2L	9082870	9083284	415	Peak_1107	169.525	0.792773	0.231596	0.000619142	0.0096178	chr2L	9077120	9077988	CG12439	FBgn0032094	-4883	1
406	chrX	2036375	2036832	458	Peak_11836	144.917	0.79245	0.325644	0.0149541	0.0930012	chrX	2035521	2038970	D2hgdh	FBgn0023507	0	2
	chrX	2036375	2036832	458	Peak_11836	144.917	0.79245	0.325644	0.0149541	0.0930012	chrX	2039168	2042599	Pgd	FBgn0004654	2337	2
407	chr2L	1074111	1074565	455	Peak_169	152.939	0.792248	0.247388	0.00136262	0.0175428	chr2L	1049673	1077815	S	FBgn0003310	0	1
	chr2L	1074111	1074565	455	Peak_169	152.939	0.792248	0.247388	0.00136262	0.0175428	chr2L	1077947	1080803	ast	FBgn0015905	3383	1
408	chr2L	267365	268093	729	Peak_46	265.966	0.791047	0.310847	0.0109336	0.0749549	chr2L	252588	271744	CG3645	FBgn0031238	0	1
	chr2L	267365	268093	729	Peak_46	265.966	0.791047	0.310847	0.0109336	0.0749549	chr2L	259948	267505	CG17075	FBgn0031239	0	1
409	chrX	19612066	19612705	640	Peak_13941	177.802	0.790522	0.263981	0.00274794	0.0283954	chrX	19612955	19624232	CG12531	FBgn0031064	251	1
	chrX	19612066	19612705	640	Peak_13941	177.802	0.790522	0.263981	0.00274794	0.0283954	chrX	19600450	19607078	meso18E	FBgn0040089	-4989	1
410	chr2L	20831076	20831427	352	Peak_2320	125.173	0.790224	0.322411	0.0142467	0.0899467	chr2L	20829608	20831161	CG31673	FBgn0051673	0	1
	chr2L	20831076	20831427	352	Peak_2320	125.173	0.790224	0.322411	0.0142467	0.0899467	chr2L	20831261	20832859	CG31674	FBgn0051674	0	1
411	chr3L	9342402	9343011	610	Peak_6383	220.826	0.789811	0.29229	0.00688932	0.05462	chr3L	9342708	9344589	PGRP-LF	FBgn0035977	0	1
	chr3L	9342402	9343011	610	Peak_6383	220.826	0.789811	0.29229	0.00688932	0.05462	chr3L	9343966	9350983	UGP	FBgn0035978	956	1
412	chrX	8427791	8428420	630	Peak_12611	312.393	0.788464	0.305657	0.00989222	0.0700232	chrX	8411405	8449203	Nrg	FBgn0264975	0	2
	chrX	8427791	8428420	630	Peak_12611	312.393	0.788464	0.305657	0.00989222	0.0700232	chrX	8419419	8423731	PIP82	FBgn0024943	-4061	1
413	chr2L	16493722	16494048	327	Peak_1895	115.818	0.786082	0.312931	0.0120049	0.0799826	chr2L	16491539	16507234	Tpr2	FBgn0032586	0	1
	chr2L	16493722	16494048	327	Peak_1895	115.818	0.786082	0.312931	0.0120049	0.0799826	chr2L	16488147	16490182	CG4580	FBgn0032585	-3541	1
414	chr3R	8086902	8087444	543	Peak_9198	181.853	0.784797	0.274808	0.00429288	0.03895	chr3R	8084458	8088601	CG44037	FBgn0264829	0	1
	chr3R	8086902	8087444	543	Peak_9198	181.853	0.784797	0.274808	0.00429288	0.03895	chr3R	8084458	8128507	svp	FBgn0003651	0	1
415	chr3R	22419577	22419893	317	Peak_10873	100.413	0.783764	0.305259	0.0102423	0.0716619	chr3R	22362071	22421910	scrib	FBgn0263289	0	1
	chr3R	22419577	22419893	317	Peak_10873	100.413	0.783764	0.305259	0.0102423	0.0716619	chr3R	22444839	22445946	TwdlM	FBgn0039434	24947	1
416	chr3L	4146367	4146589	223	Peak_5794	65.9192	0.783311	0.326788	0.0165299	0.0992135	chr3L	4142363	4145966	CG32260	FBgn0052260	-402	1
	chr3L	4146367	4146589	223	Peak_5794	65.9192	0.783311	0.326788	0.0165299	0.0992135	chr3L	4148695	4152473	CG1299	FBgn0035501	2107	1
417	chr3L	11342557	11343672	1116	Peak_6660	430.027	0.783163	0.305053	0.0102492	0.0716619	chr3L	11355085	11357985	CG6163	FBgn0036155	11414	4
	chr3L	11342557	11343672	1116	Peak_6660	430.027	0.783163	0.305053	0.0102492	0.0716619	chr3L	11312741	11314819	CG6168	FBgn0036154	-27739	4
418	chrX	6594103	6594954	852	Peak_12385	438.99	0.782608	0.257644	0.00238504	0.0258551	chrX	6593540	6613422	CG14441	FBgn0029895	0	2
	chrX	6594103	6594954	852	Peak_12385	438.99	0.782608	0.257644	0.00238504	0.0258551	chrX	6589898	6592536	CG14440	FBgn0029894	-1568	2
419	chrX	8929206	8929629	424	Peak_12669	170.796	0.782444	0.287207	0.00644344	0.0519889	chrX	8924237	8947352	Nost	FBgn0259734	0	3
	chrX	8929206	8929629	424	Peak_12669	170.796	0.782444	0.287207	0.00644344	0.0519889	chrX	8801100	8918969	rdgA	FBgn0261549	-10238	2
420	chr2L	14436883	14437685	803	Peak_1686	239.803	0.781002	0.274782	0.00447944	0.0401786	chr2L	14424314	14425189	Cpr35B	FBgn0028871	-11695	1
	chr2L	14436883	14437685	803	Peak_1686	239.803	0.781002	0.274782	0.00447944	0.0401786	chr2L	14450281	14450922	CG15283	FBgn0028844	12597	1
421	chr2L	7872194	7873085	892	Peak_952	420.518	0.779914	0.206811	0.000162502	0.00357339	chr2L	7873494	7879552	spz3	FBgn0031959	410	1
	chr2L	7872194	7873085	892	Peak_952	420.518	0.779914	0.206811	0.000162502	0.00357339	chr2L	7864641	7871341	Proc	FBgn0045038	-854	1
422	chr2R	3314777	3315296	520	Peak_2792	268.955	0.779516	0.310067	0.0119362	0.0797778	chr2R	3306854	3322377	so	FBgn0003460	0	1
	chr2R	3314777	3315296	520	Peak_2792	268.955	0.779516	0.310067	0.0119362	0.0797778	chr2R	3315409	3316098	CG11145	FBgn0033168	114	1
423	chr2L	13145296	13145681	386	Peak_1549	145.357	0.777902	0.291315	0.00757798	0.0585676	chr2L	13143213	13143622	CG16978	FBgn0040972	-1675	2
	chr2L	13145296	13145681	386	Peak_1549	145.357	0.777902	0.291315	0.00757798	0.0585676	chr2L	13142444	13142903	CG9928	FBgn0032472	-2394	1
424	chr2L	4889291	4889860	570	Peak_583	202.841	0.777774	0.310149	0.0121505	0.0805248	chr2L	4889994	4891277	CG15625	FBgn0031644	135	1
	chr2L	4889291	4889860	570	Peak_583	202.841	0.777774	0.310149	0.0121505	0.0805248	chr2L	4892111	4903458	CG3036	FBgn0031645	2252	1
425	chr3L	1204121	1204714	594	Peak_5396	173.926	0.77771	0.272268	0.00428449	0.0388989	chr3L	1200785	1232700	mwh	FBgn0264272	0	1
	chr3L	1204121	1204714	594	Peak_5396	173.926	0.77771	0.272268	0.00428449	0.0388989	chr3L	1203315	1204795	CG9119	FBgn0035189	0	1
426	chrX	1026625	1026964	340	Peak_11686	141.573	0.776679	0.321418	0.0156743	0.0960849	chrX	967073	1028929	CG3655	FBgn0040397	0	2
	chrX	1026625	1026964	340	Peak_11686	141.573	0.776679	0.321418	0.0156743	0.0960849	chrX	1039676	1040165	CG14628	FBgn0040365	12713	2
427	chr3R	2817273	2819148	1876	Peak_8554	1051.33	0.775306	0.244483	0.00151808	0.0189405	chr3R	2721974	2824950	Antp	FBgn0260642	0	3
	chr3R	2817273	2819148	1876	Peak_8554	1051.33	0.775306	0.244483	0.00151808	0.0189405	chr3R	2878056	2880263	Sodh-1	FBgn0024289	58909	2
428	chr3L	6935350	6936148	799	Peak_6093	254.694	0.775275	0.261522	0.00303195	0.0303109	chr3L	6935955	6942413	tow	FBgn0035719	0	1
	chr3L	6935350	6936148	799	Peak_6093	254.694	0.775275	0.261522	0.00303195	0.0303109	chr3L	6942590	6948612	CG10077	FBgn0035720	6443	1
429	chr2R	7710738	7711589	852	Peak_3424	425.346	0.774211	0.313942	0.0136593	0.0871729	chr2R	7712849	7714602	CG13192	FBgn0033653	1261	1
	chr2R	7710738	7711589	852	Peak_3424	425.346	0.774211	0.313942	0.0136593	0.0871729	chr2R	7714674	7727049	Sobp	FBgn0033654	3086	1
430	chr3L	11335476	11336337	862	Peak_6657	678.35	0.773189	0.256174	0.00254263	0.026984	chr3L	11355085	11357985	CG6163	FBgn0036155	18749	4
	chr3L	11335476	11336337	862	Peak_6657	678.35	0.773189	0.256174	0.00254263	0.026984	chr3L	11312741	11314819	CG6168	FBgn0036154	-20658	4
431	chrX	3664834	3665588	755	Peak_12062	394.66	0.768828	0.209707	0.00024618	0.00483333	chrX	3614039	3681002	Tlk	FBgn0283657	0	4
	chrX	3664834	3665588	755	Peak_12062	394.66	0.768828	0.209707	0.00024618	0.00483333	chrX	3671414	3671538	mir-4962	FBgn0263532	5827	4
432	chr3R	6203662	6204050	389	Peak_8986	165.173	0.767896	0.226828	0.000710817	0.0106442	chr3R	6213979	6226474	cwo	FBgn0259938	9930	1
	chr3R	6203662	6204050	389	Peak_8986	165.173	0.767896	0.226828	0.000710817	0.0106442	chr3R	6187481	6193201	Rfx	FBgn0020379	-10462	1
433	chr2R	19101116	19101642	527	Peak_4889	150.455	0.767703	0.3207	0.0166732	0.0998153	chr2R	19097652	19099062	LS2	FBgn0034834	-2055	2
	chr2R	19101116	19101642	527	Peak_4889	150.455	0.767703	0.3207	0.0166732	0.0998153	chr2R	19050534	19091496	CG34371	FBgn0085400	-9621	2
434	chr2L	18147718	18148130	413	Peak_2012	150.759	0.765082	0.256941	0.0029046	0.0294967	chr2L	18138674	18152417	Socs36E	FBgn0041184	0	1
	chr2L	18147718	18148130	413	Peak_2012	150.759	0.765082	0.256941	0.0029046	0.0294967	chr2L	18153122	18154516	CG17681	FBgn0032668	4993	1
435	chrX	7943334	7943655	322	Peak_12555	90.8213	0.764831	0.3175	0.0159999	0.0974442	chrX	7931840	7950170	fs(1)h	FBgn0004656	0	1
	chrX	7943334	7943655	322	Peak_12555	90.8213	0.764831	0.3175	0.0159999	0.0974442	chrX	7929773	7931550	CG2233	FBgn0029990	-11785	1
436	chr3R	17291355	17291986	632	Peak_10253	151.443	0.763607	0.286453	0.00768215	0.0589549	chr3R	17308046	17313166	Fancm	FBgn0038889	16061	1
	chr3R	17291355	17291986	632	Peak_10253	151.443	0.763607	0.286453	0.00768215	0.0589549	chr3R	17267298	17272259	lbe	FBgn0011278	-19097	2
437	chrX	16385133	16385429	297	Peak_13493	91.8618	0.761915	0.301033	0.0113736	0.077161	chrX	16349059	16421600	para	FBgn0285944	0	2
	chrX	16385133	16385429	297	Peak_13493	91.8618	0.761915	0.301033	0.0113736	0.077161	chrX	16416999	16419448	Cnx14D	FBgn0264077	31571	2
438	chr3R	25585168	25585989	822	Peak_11170	309.008	0.7605	0.295322	0.0100194	0.0705349	chr3R	25574940	25580250	yata	FBgn0260990	-4919	1
	chr3R	25585168	25585989	822	Peak_11170	309.008	0.7605	0.295322	0.0100194	0.0705349	chr3R	25591716	25619835	kay	FBgn0001297	5728	1
439	chr3R	17661629	17662193	565	Peak_10320	249.884	0.760188	0.309777	0.0141284	0.0894399	chr3R	17658224	17659735	Gr93a	FBgn0041229	-1895	2
	chr3R	17661629	17662193	565	Peak_10320	249.884	0.760188	0.309777	0.0141284	0.0894399	chr3R	17668242	17669487	Gr93b	FBgn0045470	6050	2
440	chr3L	20388532	20388939	408	Peak_7827	169.076	0.75928	0.284627	0.00763871	0.0587906	chr3L	20389387	20394709	trbl	FBgn0028978	449	1
	chr3L	20388532	20388939	408	Peak_7827	169.076	0.75928	0.284627	0.00763871	0.0587906	chr3L	20384784	20386653	CG33969	FBgn0053969	-1880	1
441	chrX	16061609	16062331	723	Peak_13452	257.523	0.758638	0.305832	0.0131174	0.0849803	chrX	16012099	16043010	disco-r	FBgn0285879	-18600	2
	chrX	16061609	16062331	723	Peak_13452	257.523	0.758638	0.305832	0.0131174	0.0849803	chrX	16085286	16085372	mir-985	FBgn0262283	22956	1
442	chr3R	5252850	5253416	567	Peak_8866	163.754	0.758167	0.268429	0.00473612	0.0419485	chr3R	5243661	5274371	ps	FBgn0261552	0	2
	chr3R	5252850	5253416	567	Peak_8866	163.754	0.758167	0.268429	0.00473612	0.0419485	chr3R	5238269	5242986	alpha-Man-IIa	FBgn0011740	-9865	2
443	chr2R	9784961	9785730	770	Peak_3678	501.218	0.757424	0.171719	1.02972e-05	0.000434512	chr2R	9751741	9813008	shot	FBgn0013733	0	1
	chr2R	9784961	9785730	770	Peak_3678	501.218	0.757424	0.171719	1.02972e-05	0.000434512	chr2R	9749501	9751084	CG13344	FBgn0033884	-33878	1
444	chrX	15019456	15019903	448	Peak_13330	165.797	0.756389	0.239	0.00155188	0.0192096	chrX	15019785	15031344	drd	FBgn0260006	0	2
	chrX	15019456	15019903	448	Peak_13330	165.797	0.756389	0.239	0.00155188	0.0192096	chrX	15007334	15010575	Cyp4s3	FBgn0030615	-8882	1
445	chr3R	12046842	12047667	826	Peak_9659	533.102	0.75603	0.208108	0.000280273	0.00530573	chr3R	12051372	12086051	tara	FBgn0040071	3706	6
	chr3R	12046842	12047667	826	Peak_9659	533.102	0.75603	0.208108	0.000280273	0.00530573	chr3R	12029915	12030972	mtSSB	FBgn0010438	-15871	6
446	chr3L	15222942	15224719	1778	Peak_7166	871.202	0.755544	0.261765	0.00389743	0.0364138	chr3L	15228718	15235932	Tollo	FBgn0029114	4000	2
	chr3L	15222942	15224719	1778	Peak_7166	871.202	0.755544	0.261765	0.00389743	0.0364138	chr3L	15200943	15201686	CG6888	FBgn0036490	-21257	1
447	chr2R	8902158	8902564	407	Peak_3591	156.742	0.755417	0.292639	0.00984025	0.0698041	chr2R	8884005	8895416	Su(z)2	FBgn0265623	-6743	3
	chr2R	8902158	8902564	407	Peak_3591	156.742	0.755417	0.292639	0.00984025	0.0698041	chr2R	8881401	8882127	CG33798	FBgn0053798	-20032	3
448	chr2R	7064093	7064497	405	Peak_3308	190.852	0.754615	0.267616	0.00480579	0.0423797	chr2R	7046590	7104899	shn	FBgn0003396	0	2
	chr2R	7064093	7064497	405	Peak_3308	190.852	0.754615	0.267616	0.00480579	0.0423797	chr2R	7026808	7059711	CG13229	FBgn0033579	-4383	3
449	chr4	1263986	1264388	403	Peak_11564	137.843	0.754142	0.289906	0.00928629	0.0670434	chr4	1234562	1275485	Cadps	FBgn0053653	0	1
	chr4	1263986	1264388	403	Peak_11564	137.843	0.754142	0.289906	0.00928629	0.0670434	chr4	1228814	1234439	Dyrk3	FBgn0027101	-29548	1
450	chrX	7601884	7602409	526	Peak_12520	195.197	0.754065	0.253555	0.00293976	0.0297572	chrX	7576370	7603418	CHES-1-like	FBgn0029504	0	2
	chrX	7601884	7602409	526	Peak_12520	195.197	0.754065	0.253555	0.00293976	0.0297572	chrX	7606815	7611965	CG15478	FBgn0029955	4407	1
451	chr3R	27536921	27537915	995	Peak_11417	348.906	0.752802	0.238959	0.00163081	0.0198905	chr3R	27539588	27558490	ttk	FBgn0003870	1674	2
	chr3R	27536921	27537915	995	Peak_11417	348.906	0.752802	0.238959	0.00163081	0.0198905	chr3R	27533591	27534062	CG42693	FBgn0261583	-2860	1
452	chr2R	17549439	17550021	583	Peak_4692	181.952	0.751804	0.300227	0.0122756	0.0809365	chr2R	17548471	17550500	pirk	FBgn0034647	0	1
	chr2R	17549439	17550021	583	Peak_4692	181.952	0.751804	0.300227	0.0122756	0.0809365	chr2R	17551630	17553613	CG42362	FBgn0259708	1610	1
453	chr3R	6998481	6998876	396	Peak_9082	158.623	0.751556	0.308516	0.0148491	0.0924702	chr3R	6996538	6998386	Ugt35a	FBgn0026315	-96	1
	chr3R	6998481	6998876	396	Peak_9082	158.623	0.751556	0.308516	0.0148491	0.0924702	chr3R	6999162	7001130	Ugt86Dj	FBgn0040250	287	1
454	chr3L	10839821	10840524	704	Peak_6556	179.979	0.750476	0.263823	0.00444639	0.0399328	chr3L	10850988	10867746	tna	FBgn0026160	10465	1
	chr3L	10839821	10840524	704	Peak_6556	179.979	0.750476	0.263823	0.00444639	0.0399328	chr3L	10869414	10872137	CG6418	FBgn0036104	28891	1
455	chr2R	6620103	6620396	294	Peak_3245	93.412	0.749474	0.271656	0.00579948	0.048083	chr2R	6618839	6625875	CG7220	FBgn0033544	0	1
	chr2R	6620103	6620396	294	Peak_3245	93.412	0.749474	0.271656	0.00579948	0.048083	chr2R	6617082	6619033	CG12338	FBgn0033543	-1071	1
456	chr3R	26106813	26107205	393	Peak_11257	178.641	0.748666	0.279579	0.00741002	0.0577124	chr3R	26131529	26132362	CG34300	FBgn0085329	24325	2
	chr3R	26106813	26107205	393	Peak_11257	178.641	0.748666	0.279579	0.00741002	0.0577124	chr3R	26078903	26079819	CG18404	FBgn0039761	-26995	2
457	chr3L	15663059	15663419	361	Peak_7211	129.054	0.747642	0.309683	0.0157689	0.0963726	chr3L	15654966	15655379	CG43082	FBgn0262528	-7681	1
	chr3L	15663059	15663419	361	Peak_7211	129.054	0.747642	0.309683	0.0157689	0.0963726	chr3L	15654347	15654909	Eig71Ek	FBgn0014851	-8151	1
458	chr3R	19218018	19218471	454	Peak_10496	137.318	0.746856	0.285067	0.00879464	0.0645153	chr3R	19214094	19214620	CG31515	FBgn0051515	-3399	1
	chr3R	19218018	19218471	454	Peak_10496	137.318	0.746856	0.285067	0.00879464	0.0645153	chr3R	19201649	19210499	CG4393	FBgn0039075	-7520	1
459	chr2L	19143658	19144612	955	Peak_2139	878.247	0.746597	0.241214	0.00196706	0.0226446	chr2L	19133815	19171852	brat	FBgn0010300	0	2
	chr2L	19143658	19144612	955	Peak_2139	878.247	0.746597	0.241214	0.00196706	0.0226446	chr2L	19133022	19135233	l(2)37Cg	FBgn0086447	-8426	2
460	chr2R	18569073	18570140	1068	Peak_4825	550.327	0.746309	0.224739	0.000897638	0.0127913	chr2R	18572472	18576492	Ppa	FBgn0020257	2333	1
	chr2R	18569073	18570140	1068	Peak_4825	550.327	0.746309	0.224739	0.000897638	0.0127913	chr2R	18558091	18560717	RYBP	FBgn0034763	-8357	1
461	chr3L	4413874	4414411	538	Peak_5848	218.749	0.746154	0.256223	0.00358971	0.0342326	chr3L	4406942	4420266	DOR	FBgn0035542	0	1
	chr3L	4413874	4414411	538	Peak_5848	218.749	0.746154	0.256223	0.00358971	0.0342326	chr3L	4421661	4426621	CG15020	FBgn0035543	7251	1
462	chr3R	19015918	19017476	1559	Peak_10463	992.123	0.745384	0.182745	4.52661e-05	0.00134147	chr3R	19011301	19019002	cnc	FBgn0262975	0	1
	chr3R	19015918	19017476	1559	Peak_10463	992.123	0.745384	0.182745	4.52661e-05	0.00134147	chr3R	18994038	19011364	Irk1	FBgn0265042	-4555	1
463	chr3R	17173300	17173638	339	Peak_10231	152.21	0.744348	0.277598	0.00733181	0.0573561	chr3R	17144021	17175323	CG16791	FBgn0038881	0	1
	chr3R	17173300	17173638	339	Peak_10231	152.21	0.744348	0.277598	0.00733181	0.0573561	chr3R	17176567	17203123	mod(mdg4)	FBgn0002781	2930	1
464	chr2R	18556809	18557077	269	Peak_4820	105.859	0.74367	0.257343	0.00385482	0.0360873	chr2R	18556649	18558127	CG13516	FBgn0040658	0	1
	chr2R	18556809	18557077	269	Peak_4820	105.859	0.74367	0.257343	0.00385482	0.0360873	chr2R	18554659	18556353	CG30269	FBgn0050269	-457	1
465	chr3L	4225974	4226469	496	Peak_5807	168.414	0.742711	0.259144	0.00415672	0.0381344	chr3L	4224005	4227302	ImpL2	FBgn0001257	0	1
	chr3L	4225974	4226469	496	Peak_5807	168.414	0.742711	0.259144	0.00415672	0.0381344	chr3L	4193992	4224003	CG43367	FBgn0263110	-1972	1
466	chrX	16589724	16590065	342	Peak_13523	136.652	0.741592	0.248616	0.00285546	0.0292896	chrX	16590163	16605178	CG4678	FBgn0030778	99	1
	chrX	16589724	16590065	342	Peak_13523	136.652	0.741592	0.248616	0.00285546	0.0292896	chrX	16593184	16594203	CG9676	FBgn0030773	3120	1
467	chr4	414002	414315	314	Peak_11493	136.449	0.741556	0.250258	0.00304491	0.030419	chr4	396265	408948	dati	FBgn0262636	-5055	1
	chr4	414002	414315	314	Peak_11493	136.449	0.741556	0.250258	0.00304491	0.030419	chr4	421328	421391	mir-9385	FBgn0283557	7014	1
468	chr2L	2925030	2926441	1412	Peak_375	504.259	0.741359	0.247269	0.00271596	0.0281886	chr2L	2885928	2952511	lilli	FBgn0041111	0	3
	chr2L	2925030	2926441	1412	Peak_375	504.259	0.741359	0.247269	0.00271596	0.0281886	chr2L	2954761	2964851	Rbp9	FBgn0010263	28321	2
469	chr2L	4812214	4813358	1145	Peak_574	374.684	0.741024	0.243504	0.00234104	0.0255758	chr2L	4813008	4815891	CG15629	FBgn0031630	0	1
	chr2L	4812214	4813358	1145	Peak_574	374.684	0.741024	0.243504	0.00234104	0.0255758	chr2L	4815612	4818245	CG3225	FBgn0031631	2255	1
470	chr3R	11112346	11112775	430	Peak_9540	200.149	0.740304	0.257391	0.00402508	0.0373075	chr3R	11107092	11134501	Tm1	FBgn0003721	0	1
	chr3R	11112346	11112775	430	Peak_9540	200.149	0.740304	0.257391	0.00402508	0.0373075	chr3R	11116030	11116521	CG45218	FBgn0266745	3256	1
471	chrX	8954526	8955397	872	Peak_12673	339.346	0.740265	0.234664	0.0016073	0.01974	chrX	8948730	8962016	CG15365	FBgn0030077	0	2
	chrX	8954526	8955397	872	Peak_12673	339.346	0.740265	0.234664	0.0016073	0.01974	chrX	8924237	8947352	Nost	FBgn0259734	-7175	3
472	chr3R	7474506	7475223	718	Peak_9124	291.331	0.737944	0.294447	0.0122035	0.0806118	chr3R	7476692	7481413	Elp1	FBgn0037926	1470	1
	chr3R	7474506	7475223	718	Peak_9124	291.331	0.737944	0.294447	0.0122035	0.0806118	chr3R	7458999	7472698	Csk	FBgn0262081	-1809	1
473	chr2R	19099408	19100658	1251	Peak_4888	427.029	0.737802	0.279764	0.00835853	0.0626491	chr2R	19097652	19099062	LS2	FBgn0034834	-347	2
	chr2R	19099408	19100658	1251	Peak_4888	427.029	0.737802	0.279764	0.00835853	0.0626491	chr2R	19050534	19091496	CG34371	FBgn0085400	-7913	2
474	chr2L	11441093	11441376	284	Peak_1395	97.884	0.737707	0.290536	0.011113	0.0759637	chr2L	11434310	11445614	salm	FBgn0261648	0	2
	chr2L	11441093	11441376	284	Peak_1395	97.884	0.737707	0.290536	0.011113	0.0759637	chr2L	11484706	11486949	CG43355	FBgn0263087	43331	1
475	chrX	11321269	11321545	277	Peak_12925	90.1325	0.736105	0.279024	0.00833623	0.0625189	chrX	11316864	11324230	Gs2	FBgn0001145	0	1
	chrX	11321269	11321545	277	Peak_12925	90.1325	0.736105	0.279024	0.00833623	0.0625189	chrX	11324555	11348371	Evi5	FBgn0262740	3011	2
476	chr3R	20095687	20096277	591	Peak_10617	249.462	0.735908	0.238185	0.00200394	0.0229574	chr3R	20078547	20096955	jar	FBgn0011225	0	1
	chr3R	20095687	20096277	591	Peak_10617	249.462	0.735908	0.238185	0.00200394	0.0229574	chr3R	20098750	20101450	Orct2	FBgn0086365	2474	1
477	chr3L	8066935	8067565	631	Peak_6226	364.69	0.735242	0.255839	0.00405501	0.0374162	chr3L	8056973	8101936	Ect4	FBgn0262579	0	1
	chr3L	8066935	8067565	631	Peak_6226	364.69	0.735242	0.255839	0.00405501	0.0374162	chr3L	8062552	8063060	CG42591	FBgn0260968	-3876	1
478	chr2L	1578902	1579748	847	Peak_224	291.651	0.734913	0.304795	0.0159013	0.0970304	chr2L	1555128	1608404	haf	FBgn0261509	0	1
	chr2L	1578902	1579748	847	Peak_224	291.651	0.734913	0.304795	0.0159013	0.0970304	chr2L	1584865	1587155	CG10869	FBgn0031347	5118	1
479	chrX	11049892	11050507	616	Peak_12910	239.736	0.734695	0.230957	0.00146724	0.0185064	chrX	11048453	11057229	Dlic	FBgn0030276	0	1
	chrX	11049892	11050507	616	Peak_12910	239.736	0.734695	0.230957	0.00146724	0.0185064	chrX	11050708	11053793	CG32668	FBgn0052668	202	1
480	chr3L	11336474	11337372	899	Peak_6658	778.954	0.733783	0.263808	0.00541072	0.0459375	chr3L	11355085	11357985	CG6163	FBgn0036155	17714	4
	chr3L	11336474	11337372	899	Peak_6658	778.954	0.733783	0.263808	0.00541072	0.0459375	chr3L	11312741	11314819	CG6168	FBgn0036154	-21656	4
481	chr3R	12056082	12056444	363	Peak_9664	112.228	0.73086	0.290711	0.0119355	0.0797778	chr3R	12051372	12086051	tara	FBgn0040071	0	6
	chr3R	12056082	12056444	363	Peak_9664	112.228	0.73086	0.290711	0.0119355	0.0797778	chr3R	12029915	12030972	mtSSB	FBgn0010438	-25111	6
482	chrX	11526707	11527542	836	Peak_12961	691.215	0.730788	0.300862	0.0151414	0.0939217	chrX	11516047	11571371	Ptp10D	FBgn0004370	0	2
	chrX	11526707	11527542	836	Peak_12961	691.215	0.730788	0.300862	0.0151414	0.0939217	chrX	11510156	11513981	Met	FBgn0002723	-12727	3
483	chrX	8411908	8413159	1252	Peak_12609	1128.33	0.729639	0.227418	0.00133497	0.0173129	chrX	8411405	8449203	Nrg	FBgn0264975	0	2
	chrX	8411908	8413159	1252	Peak_12609	1128.33	0.729639	0.227418	0.00133497	0.0173129	chrX	8383380	8411062	CG33181	FBgn0053181	-847	1
484	chr3R	18215737	18216476	740	Peak_10393	443.281	0.728971	0.224468	0.00116402	0.0156561	chr3R	18215501	18218071	CG7059	FBgn0038957	0	1
	chr3R	18215737	18216476	740	Peak_10393	443.281	0.728971	0.224468	0.00116402	0.0156561	chr3R	18212210	18215436	CG5379	FBgn0038956	-302	1
485	chr2L	14621291	14621575	285	Peak_1741	110.116	0.728755	0.282402	0.00986402	0.0698936	chr2L	14599195	14689340	osp	FBgn0003016	0	3
	chr2L	14621291	14621575	285	Peak_1741	110.116	0.728755	0.282402	0.00986402	0.0698936	chr2L	14615551	14618902	Adh	FBgn0000055	-2390	2
486	chrX	12559901	12561032	1132	Peak_13059	898.581	0.728623	0.214399	0.000677707	0.0102659	chrX	12553447	12573735	Tis11	FBgn0011837	0	1
	chrX	12559901	12561032	1132	Peak_13059	898.581	0.728623	0.214399	0.000677707	0.0102659	chrX	12559249	12559301	mir-9377	FBgn0283559	-601	1
487	chr2R	13679949	13680517	569	Peak_4177	335.203	0.727675	0.224206	0.00117216	0.0157356	chr2R	13677183	13679953	CG5033	FBgn0028744	0	1
	chr2R	13679949	13680517	569	Peak_4177	335.203	0.727675	0.224206	0.00117216	0.0157356	chr2R	13680374	13688182	Dhit	FBgn0028743	0	1
488	chr3R	19613195	19613927	733	Peak_10539	287.047	0.726382	0.271616	0.00748859	0.0580684	chr3R	19607486	19627356	mbc	FBgn0015513	0	1
	chr3R	19613195	19613927	733	Peak_10539	287.047	0.726382	0.271616	0.00748859	0.0580684	chr3R	19599946	19607131	Nup98-96	FBgn0039120	-6065	2
489	chr2L	502640	503044	405	Peak_84	172.288	0.725811	0.259744	0.00520067	0.0448546	chr2L	476219	540532	ush	FBgn0003963	0	4
	chr2L	502640	503044	405	Peak_84	172.288	0.725811	0.259744	0.00520067	0.0448546	chr2L	476445	479688	cbt	FBgn0043364	-22953	1
490	chr3R	856549	857229	681	Peak_8304	265.553	0.72489	0.282326	0.0102415	0.0716619	chr3R	812221	836753	plh	FBgn0037292	-19797	3
	chr3R	856549	857229	681	Peak_8304	265.553	0.72489	0.282326	0.0102415	0.0716619	chr3R	903500	912794	corto	FBgn0010313	46272	4
491	chr3R	26955919	26956242	324	Peak_11343	157.518	0.723938	0.293882	0.0137642	0.0877403	chr3R	26953686	26956103	CG15556	FBgn0039821	0	1
	chr3R	26955919	26956242	324	Peak_11343	157.518	0.723938	0.293882	0.0137642	0.0877403	chr3R	26951870	26953057	CG15554	FBgn0039820	-2863	1
492	chr3R	689592	689824	233	Peak_8268	106.693	0.723142	0.301702	0.0165356	0.0992135	chr3R	678534	695701	opa	FBgn0003002	0	2
	chr3R	689592	689824	233	Peak_8268	106.693	0.723142	0.301702	0.0165356	0.0992135	chr3R	701726	704255	laf	FBgn0020280	11903	2
493	chr2L	21883350	21883967	618	Peak_2461	190.457	0.722292	0.237723	0.00237852	0.0258041	chr2L	21896665	21898289	CG11629	FBgn0032965	12699	2
	chr2L	21883350	21883967	618	Peak_2461	190.457	0.722292	0.237723	0.00237852	0.0258041	chr2L	21902992	21903739	CG1421	FBgn0032966	19026	2
494	chrX	1163533	1165456	1924	Peak_11709	630.119	0.722054	0.23911	0.00252984	0.0269584	chrX	1136772	1169317	Atf3	FBgn0028550	0	4
	chrX	1163533	1165456	1924	Peak_11709	630.119	0.722054	0.23911	0.00252984	0.0269584	chrX	1181322	1182978	CG32812	FBgn0025642	15867	3
495	chr2L	21935459	21935902	444	Peak_2467	153.283	0.71997	0.297243	0.0154284	0.0951811	chr2L	21916299	21920324	CG11634	FBgn0032968	-15136	1
	chr2L	21935459	21935902	444	Peak_2467	153.283	0.71997	0.297243	0.0154284	0.0951811	chr2L	21914268	21915358	CG31600	FBgn0283728	-20102	1
496	chr3R	9717765	9718394	630	Peak_9359	165.668	0.719961	0.292501	0.0138397	0.0880858	chr3R	9727574	9730342	ems	FBgn0000576	9181	1
	chr3R	9717765	9718394	630	Peak_9359	165.668	0.719961	0.292501	0.0138397	0.0880858	chr3R	9693066	9700638	E5	FBgn0008646	-17128	1
497	chr3R	685149	685806	658	Peak_8267	348.723	0.719567	0.299144	0.016154	0.0977537	chr3R	678534	695701	opa	FBgn0003002	0	2
	chr3R	685149	685806	658	Peak_8267	348.723	0.719567	0.299144	0.016154	0.0977537	chr3R	701726	704255	laf	FBgn0020280	15921	2
498	chrX	596293	596766	474	Peak_11633	226.901	0.718961	0.247145	0.00362513	0.0344388	chrX	580866	643529	sdk	FBgn0021764	0	2
	chrX	596293	596766	474	Peak_11633	226.901	0.718961	0.247145	0.00362513	0.0344388	chrX	550146	551932	SkpA	FBgn0025637	-44362	1
499	chr2R	6417958	6418371	414	Peak_3210	164.841	0.718187	0.250146	0.0040908	0.0376727	chr2R	6369398	6429175	lola	FBgn0283521	0	2
	chr2R	6417958	6418371	414	Peak_3210	164.841	0.718187	0.250146	0.0040908	0.0376727	chr2R	6423999	6424165	snoRNA:lola-a	FBgn0263466	5629	2
500	chr3L	16889460	16889844	385	Peak_7399	140.349	0.717958	0.271827	0.00826059	0.0622783	chr3L	16858394	16915587	Lmpt	FBgn0261565	0	4
	chr3L	16889460	16889844	385	Peak_7399	140.349	0.717958	0.271827	0.00826059	0.0622783	chr3L	16870408	16872472	CG32170	FBgn0052170	-16989	3
501	chr2R	10191892	10192583	692	Peak_3752	209.622	0.717484	0.238158	0.00258992	0.0273542	chr2R	10187607	10189858	tej	FBgn0033921	-2035	1
	chr2R	10191892	10192583	692	Peak_3752	209.622	0.717484	0.238158	0.00258992	0.0273542	chr2R	10195646	10239307	Shroom	FBgn0085408	3064	2
502	chr2L	8276975	8277380	406	Peak_1010	224.827	0.717179	0.258413	0.00551466	0.0465712	chr2L	8258372	8300746	Btk29A	FBgn0003502	0	3
	chr2L	8276975	8277380	406	Peak_1010	224.827	0.717179	0.258413	0.00551466	0.0465712	chr2L	8258615	8258692	mir-2b-1	FBgn0262374	-18284	1
503	chr3R	4013118	4013870	753	Peak_8690	248.779	0.716637	0.276955	0.00966596	0.0689743	chr3R	3973089	4007166	grn	FBgn0001138	-5953	2
	chr3R	4013118	4013870	753	Peak_8690	248.779	0.716637	0.276955	0.00966596	0.0689743	chr3R	4029916	4030552	CheA84a	FBgn0261290	16047	3
504	chr3R	1531063	1531799	737	Peak_8410	221.063	0.716228	0.298698	0.0164925	0.0990811	chr3R	1511576	1538559	plx	FBgn0261261	0	1
	chr3R	1531063	1531799	737	Peak_8410	221.063	0.716228	0.298698	0.0164925	0.0990811	chr3R	1538696	1542527	cas	FBgn0004878	6898	1
505	chr2R	9915552	9915934	383	Peak_3713	128.529	0.716202	0.281154	0.010854	0.0745178	chr2R	9878707	9946202	mam	FBgn0002643	0	1
	chr2R	9915552	9915934	383	Peak_3713	128.529	0.716202	0.281154	0.010854	0.0745178	chr2R	9916124	9916601	CG18371	FBgn0033893	191	1
506	chrX	18259986	18261744	1759	Peak_13743	1068.25	0.714806	0.277822	0.0100852	0.0708923	chrX	18260389	18270850	CrebB	FBgn0265784	0	1
	chrX	18259986	18261744	1759	Peak_13743	1068.25	0.714806	0.277822	0.0100852	0.0708923	chrX	18252913	18256560	CG6106	FBgn0030914	-3427	1
507	chr2L	6757612	6757976	365	Peak_807	93.3668	0.714794	0.278635	0.0103074	0.0719178	chr2L	6757863	6759628	CG11322	FBgn0031856	0	1
	chr2L	6757612	6757976	365	Peak_807	93.3668	0.714794	0.278635	0.0103074	0.0719178	chr2L	6742501	6756133	CG11221	FBgn0031855	-1480	1
508	chr3L	3892917	3893551	635	Peak_5766	283.263	0.712821	0.213932	0.000862261	0.0124887	chr3L	3892573	3894833	Fie	FBgn0026592	0	1
	chr3L	3892917	3893551	635	Peak_5766	283.263	0.712821	0.213932	0.000862261	0.0124887	chr3L	3893055	3893330	snRNA:U11	FBgn0083987	0	1
509	chr2R	9463437	9464880	1444	Peak_3657	879.386	0.710018	0.264972	0.0073711	0.0575513	chr2R	9461122	9461762	CG42808	FBgn0261990	-1676	2
	chr2R	9463437	9464880	1444	Peak_3657	879.386	0.710018	0.264972	0.0073711	0.0575513	chr2R	9467817	9480844	CG6191	FBgn0027581	2938	1
510	chrX	18845005	18845592	588	Peak_13827	250.688	0.707969	0.223487	0.0015358	0.0190843	chrX	18824367	18922662	CG43759	FBgn0264090	0	4
	chrX	18845005	18845592	588	Peak_13827	250.688	0.707969	0.223487	0.0015358	0.0190843	chrX	18794442	18804091	CG7378	FBgn0030976	-40915	4
511	chr2R	7080227	7080704	478	Peak_3316	202.845	0.706242	0.253424	0.00532307	0.045439	chr2R	7046590	7104899	shn	FBgn0003396	0	2
	chr2R	7080227	7080704	478	Peak_3316	202.845	0.706242	0.253424	0.00532307	0.045439	chr2R	7026808	7059711	CG13229	FBgn0033579	-20517	3
512	chr3L	16800145	16801077	933	Peak_7378	359.427	0.70613	0.235148	0.00267408	0.0279179	chr3L	16798093	16812632	nudC	FBgn0021768	0	4
	chr3L	16800145	16801077	933	Peak_7378	359.427	0.70613	0.235148	0.00267408	0.0279179	chr3L	16802757	16822174	CG13024	FBgn0036665	1681	3
513	chr3R	12114450	12114934	485	Peak_9689	233.89	0.705064	0.278262	0.011283	0.0768285	chr3R	12098173	12128094	gish	FBgn0250823	0	2
	chr3R	12114450	12114934	485	Peak_9689	233.89	0.705064	0.278262	0.011283	0.0768285	chr3R	12094050	12098137	Mat89Ba	FBgn0261286	-16314	2
514	chr3L	1440506	1441485	980	Peak_5432	517.597	0.70215	0.263467	0.00769804	0.0590447	chr3L	1434335	1437872	SA-2	FBgn0043865	-2635	1
	chr3L	1440506	1441485	980	Peak_5432	517.597	0.70215	0.263467	0.00769804	0.0590447	chr3L	1421198	1423471	CG9173	FBgn0035218	-17036	1
515	chr3R	6456713	6457212	500	Peak_9037	236.272	0.701898	0.278086	0.0116017	0.078151	chr3R	6333282	6439998	hth	FBgn0001235	-16716	2
	chr3R	6456713	6457212	500	Peak_9037	236.272	0.701898	0.278086	0.0116017	0.078151	chr3R	6501281	6502973	CG6465	FBgn0037818	44070	3
516	chr3L	11054360	11054814	455	Peak_6607	161.03	0.700701	0.272686	0.0101807	0.0713508	chr3L	11054670	11055315	Blos2	FBgn0036118	0	1
	chr3L	11054360	11054814	455	Peak_6607	161.03	0.700701	0.272686	0.0101807	0.0713508	chr3L	11052536	11054324	CG6321	FBgn0036117	-37	1
517	chrX	16017837	16018649	813	Peak_13440	416.886	0.700234	0.239788	0.00349783	0.0336134	chrX	16012099	16043010	disco-r	FBgn0285879	0	2
	chrX	16017837	16018649	813	Peak_13440	416.886	0.700234	0.239788	0.00349783	0.0336134	chrX	15987091	15998979	CG42354	FBgn0259700	-18859	1
518	chrX	19323090	19323677	588	Peak_13896	147.265	0.699452	0.276616	0.0114518	0.0775301	chrX	19247213	19364074	kek5	FBgn0031016	0	1
	chrX	19323090	19323677	588	Peak_13896	147.265	0.699452	0.276616	0.0114518	0.0775301	chrX	19368188	19373352	CG32533	FBgn0052533	44512	1
519	chr2R	4541140	4541443	304	Peak_2958	113.054	0.699367	0.286503	0.0146448	0.0914392	chr2R	4537153	4552728	ptc	FBgn0003892	0	3
	chr2R	4541140	4541443	304	Peak_2958	113.054	0.699367	0.286503	0.0146448	0.0914392	chr2R	4553317	4570527	Acsl	FBgn0263120	11875	3
520	chr2L	9120640	9121252	613	Peak_1108	222.059	0.697933	0.269291	0.00954899	0.068312	chr2L	9125736	9163721	CG32982	FBgn0052982	4485	1
	chr2L	9120640	9121252	613	Peak_1108	222.059	0.697933	0.269291	0.00954899	0.068312	chr2L	9111813	9113285	Or30a	FBgn0032096	-7356	1
521	chrX	10680706	10681131	426	Peak_12866	198.434	0.69753	0.229127	0.00233226	0.0255375	chrX	10681901	10715850	Imp	FBgn0285926	771	4
	chrX	10680706	10681131	426	Peak_12866	198.434	0.69753	0.229127	0.00233226	0.0255375	chrX	10674925	10678491	sesB	FBgn0003360	-2216	1
522	chr2R	19457323	19457904	582	Peak_4930	165.74	0.696937	0.256007	0.00648219	0.0522284	chr2R	19452413	19487049	apt	FBgn0015903	0	5
	chr2R	19457323	19457904	582	Peak_4930	165.74	0.696937	0.256007	0.00648219	0.0522284	chr2R	19451495	19452303	CG30184	FBgn0050184	-5021	3
523	chr3R	12047785	12048519	735	Peak_9660	528.704	0.696896	0.188169	0.000212593	0.0043781	chr3R	12051372	12086051	tara	FBgn0040071	2854	6
	chr3R	12047785	12048519	735	Peak_9660	528.704	0.696896	0.188169	0.000212593	0.0043781	chr3R	12029915	12030972	mtSSB	FBgn0010438	-16814	6
524	chr3L	16870229	16870620	392	Peak_7394	138.814	0.696823	0.272149	0.0104537	0.072616	chr3L	16858394	16915587	Lmpt	FBgn0261565	0	4
	chr3L	16870229	16870620	392	Peak_7394	138.814	0.696823	0.272149	0.0104537	0.072616	chr3L	16870408	16872472	CG32170	FBgn0052170	0	3
525	chr3R	13532301	13533022	722	Peak_9847	300.645	0.696458	0.240489	0.00377938	0.0356169	chr3R	13513539	13544072	osa	FBgn0261885	0	1
	chr3R	13532301	13533022	722	Peak_9847	300.645	0.696458	0.240489	0.00377938	0.0356169	chr3R	13545175	13548677	Pxt	FBgn0261987	12154	1
526	chr3L	7588352	7588858	507	Peak_6157	215.171	0.695637	0.274568	0.0112907	0.0768443	chr3L	7586190	7632673	Pura	FBgn0035802	0	2
	chr3L	7588352	7588858	507	Peak_6157	215.171	0.695637	0.274568	0.0112907	0.0768443	chr3L	7581707	7584098	CG7716	FBgn0035800	-4255	1
527	chr2L	22179599	22180092	494	Peak_2489	198.795	0.694492	0.226458	0.00216395	0.0242017	chr2L	22175414	22183991	CG3635	FBgn0032981	0	1
	chr2L	22179599	22180092	494	Peak_2489	198.795	0.694492	0.226458	0.00216395	0.0242017	chr2L	22189525	22198553	Ir40a	FBgn0259683	9434	1
528	chr3L	18050078	18050546	469	Peak_7556	252.206	0.694095	0.245235	0.00464999	0.0413931	chr3L	17944052	18057796	Eip75B	FBgn0000568	0	5
	chr3L	18050078	18050546	469	Peak_7556	252.206	0.694095	0.245235	0.00464999	0.0413931	chr3L	18061827	18063250	CG44006	FBgn0264748	11282	1
529	chr2L	5974097	5974379	283	Peak_709	113.424	0.693362	0.263319	0.00845929	0.0630699	chr2L	5972114	5981018	chic	FBgn0000308	0	1
	chr2L	5974097	5974379	283	Peak_709	113.424	0.693362	0.263319	0.00845929	0.0630699	chr2L	5969858	5970651	Ucp4B	FBgn0031758	-3447	1
530	chr2L	20325987	20326900	914	Peak_2271	257.374	0.692996	0.255543	0.00669069	0.0532543	chr2L	20311218	20348386	spir	FBgn0003475	0	2
	chr2L	20325987	20326900	914	Peak_2271	257.374	0.692996	0.255543	0.00669069	0.0532543	chr2L	20348392	20350012	La	FBgn0011638	21493	1
531	chrX	6768914	6769458	545	Peak_12422	450.536	0.691343	0.282657	0.0144502	0.090625	chrX	6757920	6770223	CG43736	FBgn0263993	0	3
	chrX	6768914	6769458	545	Peak_12422	450.536	0.691343	0.282657	0.0144502	0.090625	chrX	6745941	6746671	CG14434	FBgn0029915	-22244	4
532	chr2R	6763044	6763484	441	Peak_3266	156.437	0.690949	0.21908	0.00161122	0.019771	chr2R	6763252	6764801	nclb	FBgn0263510	0	1
	chr2R	6763044	6763484	441	Peak_3266	156.437	0.690949	0.21908	0.00161122	0.019771	chr2R	6762396	6762897	CG30016	FBgn0050016	-148	1
533	chrX	17572272	17573062	791	Peak_13649	289.046	0.690725	0.230909	0.00277771	0.028682	chrX	17566490	17592763	chas	FBgn0263258	0	1
	chrX	17572272	17573062	791	Peak_13649	289.046	0.690725	0.230909	0.00277771	0.028682	chrX	17563240	17565921	CG12990	FBgn0030859	-6352	1
534	chr3L	14797773	14798395	623	Peak_7107	461.808	0.690589	0.239348	0.00391043	0.0365112	chr3L	14798235	14860805	CG17839	FBgn0036454	0	1
	chr3L	14797773	14798395	623	Peak_7107	461.808	0.690589	0.239348	0.00391043	0.0365112	chr3L	14795479	14796460	gnu	FBgn0001120	-1314	1
535	chr3L	14335550	14336315	766	Peak_7036	368.197	0.690548	0.239919	0.00399889	0.0370921	chr3L	14267442	14361739	fz	FBgn0001085	0	2
	chr3L	14335550	14336315	766	Peak_7036	368.197	0.690548	0.239919	0.00399889	0.0370921	chr3L	14322445	14322985	CG13482	FBgn0036419	-12566	2
536	chr2L	8473069	8473979	911	Peak_1049	805.37	0.690001	0.235261	0.00335788	0.0326596	chr2L	8466816	8488671	d	FBgn0262029	0	1
	chr2L	8473069	8473979	911	Peak_1049	805.37	0.690001	0.235261	0.00335788	0.0326596	chr2L	8477348	8478088	CheA29a	FBgn0053194	3370	1
537	chr3R	17683058	17683940	883	Peak_10327	373.897	0.68944	0.264617	0.00917587	0.066518	chr3R	17676415	17681988	glec	FBgn0015229	-1071	1
	chr3R	17683058	17683940	883	Peak_10327	373.897	0.68944	0.264617	0.00917587	0.066518	chr3R	17690889	17691960	lsn	FBgn0260940	6950	1
538	chr2R	13023655	13024232	578	Peak_4105	198.298	0.688866	0.286801	0.0163103	0.0983729	chr2R	13023955	13024408	Gbp1	FBgn0034199	0	1
	chr2R	13023655	13024232	578	Peak_4105	198.298	0.688866	0.286801	0.0163103	0.0983729	chr2R	13024744	13027100	Gbp2	FBgn0034200	513	1
539	chr3R	11495832	11496064	233	Peak_9593	108.923	0.688641	0.274182	0.0120178	0.0799826	chr3R	11491904	11516235	pxb	FBgn0053207	0	1
	chr3R	11495832	11496064	233	Peak_9593	108.923	0.688641	0.274182	0.0120178	0.0799826	chr3R	11518807	11519916	CG31446	FBgn0051446	22744	1
540	chr3R	5909740	5910430	691	Peak_8958	800.22	0.688529	0.2263	0.00234586	0.0255872	chr3R	5916847	5916939	mir-317	FBgn0262378	6418	1
	chr3R	5909740	5910430	691	Peak_8958	800.22	0.688529	0.2263	0.00234586	0.0255872	chr3R	5899542	5901095	CG5361	FBgn0037786	-8646	1
541	chr3R	24894306	24895684	1379	Peak_11066	1046.5	0.688443	0.214717	0.00134461	0.017406	chr3R	24888761	24934670	CG11873	FBgn0039633	0	1
	chr3R	24894306	24895684	1379	Peak_11066	1046.5	0.688443	0.214717	0.00134461	0.017406	chr3R	24884993	24888697	Cul5	FBgn0039632	-5610	1
542	chr2L	12718744	12720540	1797	Peak_1514	695.815	0.686545	0.252404	0.00652763	0.0523693	chr2L	12713275	12721843	Pih1D1	FBgn0032455	0	1
	chr2L	12718744	12720540	1797	Peak_1514	695.815	0.686545	0.252404	0.00652763	0.0523693	chr2L	12719044	12766546	MRP	FBgn0032456	0	1
543	chr2R	5816978	5817736	759	Peak_3126	574.102	0.68421	0.273585	0.0123876	0.0815608	chr2R	5801000	5817120	Mef2	FBgn0011656	0	1
	chr2R	5816978	5817736	759	Peak_3126	574.102	0.68421	0.273585	0.0123876	0.0815608	chr2R	5798397	5800993	Etf-QO	FBgn0286783	-15986	1
544	chr3R	27886677	27887343	667	Peak_11461	220.932	0.684141	0.282157	0.0153218	0.0947876	chr3R	27881000	27894163	Map205	FBgn0002645	0	1
	chr3R	27886677	27887343	667	Peak_11461	220.932	0.684141	0.282157	0.0153218	0.0947876	chr3R	27877781	27880696	mod	FBgn0002780	-5982	1
545	chrX	10523165	10523599	435	Peak_12846	181.228	0.683691	0.250375	0.00632074	0.0512916	chrX	10521769	10604659	X11Lbeta	FBgn0052677	0	1
	chrX	10523165	10523599	435	Peak_12846	181.228	0.683691	0.250375	0.00632074	0.0512916	chrX	10517757	10521145	CG9806	FBgn0030222	-2021	1
546	chr3L	11063390	11064133	744	Peak_6610	421.77	0.683132	0.214468	0.00144632	0.0184024	chr3L	11063625	11066448	Mocs1	FBgn0263241	0	1
	chr3L	11063390	11064133	744	Peak_6610	421.77	0.683132	0.214468	0.00144632	0.0184024	chr3L	11062145	11062964	CG6310	FBgn0036121	-427	1
547	chrX	13127442	13128817	1376	Peak_13118	1187.07	0.68259	0.225942	0.00251868	0.0269584	chrX	13108441	13151216	mew	FBgn0004456	0	1
	chrX	13127442	13128817	1376	Peak_13118	1187.07	0.68259	0.225942	0.00251868	0.0269584	chrX	13129957	13130599	CG32639	FBgn0052639	1141	1
548	chr3L	139865	140086	222	Peak_5197	156.981	0.682444	0.243546	0.00507681	0.044161	chr3L	129449	145895	Pdk1	FBgn0020386	0	1
	chr3L	139865	140086	222	Peak_5197	156.981	0.682444	0.243546	0.00507681	0.044161	chr3L	146432	149056	CG6845	FBgn0035099	6347	1
549	chr2R	20438482	20439178	697	Peak_5083	228.592	0.682167	0.263478	0.00962323	0.0687735	chr2R	20420896	20443823	CG4622	FBgn0035021	0	1
	chr2R	20438482	20439178	697	Peak_5083	228.592	0.682167	0.263478	0.00962323	0.0687735	chr2R	20424943	20444460	ITP	FBgn0035023	0	1
550	chr3R	21340302	21340781	480	Peak_10749	209.357	0.681541	0.254985	0.00752053	0.0582522	chr3R	21341839	21434145	msi	FBgn0011666	1059	2
	chr3R	21340302	21340781	480	Peak_10749	209.357	0.681541	0.254985	0.00752053	0.0582522	chr3R	21331996	21334001	CG5111	FBgn0039343	-6302	1
551	chr3R	17282297	17283000	704	Peak_10251	427.658	0.679774	0.236449	0.00404122	0.0373621	chr3R	17267298	17272259	lbe	FBgn0011278	-10039	2
	chr3R	17282297	17283000	704	Peak_10251	427.658	0.679774	0.236449	0.00404122	0.0373621	chr3R	17235700	17259855	lbl	FBgn0008651	-22443	3
552	chr2R	12936380	12936921	542	Peak_4090	184.008	0.678181	0.240402	0.00478697	0.0422664	chr2R	12936379	12941360	CG9646	FBgn0034184	0	1
	chr2R	12936380	12936921	542	Peak_4090	184.008	0.678181	0.240402	0.00478697	0.0422664	chr2R	12934343	12936299	SmydA-6	FBgn0034183	-82	1
553	chr3L	10708600	10710346	1747	Peak_6532	1975.78	0.677621	0.225126	0.00261283	0.0274814	chr3L	10687459	10689977	NijA	FBgn0036101	-18624	1
	chr3L	10708600	10710346	1747	Peak_6532	1975.78	0.677621	0.225126	0.00261283	0.0274814	chr3L	10686283	10687208	ND-13B	FBgn0047038	-21393	1
554	chr3L	647053	647567	515	Peak_5301	214.458	0.677411	0.258174	0.00869399	0.0640763	chr3L	648554	651311	Gale	FBgn0035147	988	1
	chr3L	647053	647567	515	Peak_5301	214.458	0.677411	0.258174	0.00869399	0.0640763	chr3L	651541	652881	CG3402	FBgn0035148	3975	1
555	chr2R	17262371	17263476	1106	Peak_4645	326.837	0.67723	0.209956	0.00125715	0.016593	chr2R	17242519	17266969	cv-2	FBgn0000395	0	2
	chr2R	17262371	17263476	1106	Peak_4645	326.837	0.67723	0.209956	0.00125715	0.016593	chr2R	17270731	17271896	CG10795	FBgn0034626	7256	1
556	chr2R	10917214	10917964	751	Peak_3844	452.863	0.676771	0.272647	0.0130567	0.0848686	chr2R	10898900	10928883	hbs	FBgn0029082	0	1
	chr2R	10917214	10917964	751	Peak_3844	452.863	0.676771	0.272647	0.0130567	0.0848686	chr2R	10911879	10912344	Obp51a	FBgn0043530	-4871	1
557	chr2R	8150175	8150669	495	Peak_3487	152.795	0.676623	0.262272	0.00988434	0.0700025	chr2R	8146902	8162130	Cam	FBgn0000253	0	1
	chr2R	8150175	8150669	495	Peak_3487	152.795	0.676623	0.262272	0.00988434	0.0700025	chr2R	8144786	8146157	Vha36-2	FBgn0033706	-4019	1
558	chr3L	16152886	16153199	314	Peak_7272	147.486	0.675903	0.274419	0.0137768	0.0877642	chr3L	16130901	16157801	CG5151	FBgn0036576	0	3
	chr3L	16152886	16153199	314	Peak_7272	147.486	0.675903	0.274419	0.0137768	0.0877642	chr3L	16162554	16163206	CG33796	FBgn0053796	9356	3
559	chr3R	19140857	19141353	497	Peak_10482	225.68	0.675708	0.217366	0.00187961	0.0219989	chr3R	19115952	19171889	pnt	FBgn0003118	0	1
	chr3R	19140857	19141353	497	Peak_10482	225.68	0.675708	0.217366	0.00187961	0.0219989	chr3R	19113938	19115911	bb8	FBgn0039071	-24947	1
560	chrX	17700046	17700950	905	Peak_13675	339.442	0.675703	0.246545	0.0061311	0.0501558	chrX	17685042	17708044	OdsH	FBgn0026058	0	2
	chrX	17700046	17700950	905	Peak_13675	339.442	0.675703	0.246545	0.0061311	0.0501558	chrX	17713187	17713718	CG12986	FBgn0030868	12238	2
561	chrX	15030931	15031670	740	Peak_13332	242.903	0.675664	0.273971	0.0136559	0.0871729	chrX	15019785	15031344	drd	FBgn0260006	0	2
	chrX	15030931	15031670	740	Peak_13332	242.903	0.675664	0.273971	0.0136559	0.0871729	chrX	15033969	15057258	CG9095	FBgn0030617	2300	1
562	chrX	12630993	12632062	1070	Peak_13075	1105.76	0.67555	0.198625	0.000671071	0.0102003	chrX	12578235	12636477	Smr	FBgn0265523	0	1
	chrX	12630993	12632062	1070	Peak_13075	1105.76	0.67555	0.198625	0.000671071	0.0102003	chrX	12638244	12642400	CG4004	FBgn0030418	6183	1
563	chr3R	8890882	8891438	557	Peak_9269	368.236	0.675521	0.224891	0.00266654	0.0278803	chr3R	8883476	8903846	sim	FBgn0004666	0	1
	chr3R	8890882	8891438	557	Peak_9269	368.236	0.675521	0.224891	0.00266654	0.0278803	chr3R	8877966	8882447	pic	FBgn0260962	-8436	1
564	chr3L	311459	311954	496	Peak_5236	172.094	0.675326	0.273267	0.0134619	0.0864341	chr3L	305392	319884	fwd	FBgn0004373	0	1
	chr3L	311459	311954	496	Peak_5236	172.094	0.675326	0.273267	0.0134619	0.0864341	chr3L	317083	317699	ddbt	FBgn0284444	5130	1
565	chrX	12101192	12101692	501	Peak_13020	244.891	0.67407	0.230495	0.00345071	0.0332964	chrX	11937730	12226198	Ten-a	FBgn0267001	0	3
	chrX	12101192	12101692	501	Peak_13020	244.891	0.67407	0.230495	0.00345071	0.0332964	chrX	12128594	12129910	CG32655	FBgn0052655	26903	2
566	chr3R	17739121	17739974	854	Peak_10338	580.069	0.673968	0.231018	0.00352979	0.0338632	chr3R	17737537	17739313	CG6690	FBgn0038918	0	1
	chr3R	17739121	17739974	854	Peak_10338	580.069	0.673968	0.231018	0.00352979	0.0338632	chr3R	17739468	17741268	CG17843	FBgn0038919	0	1
567	chr3R	25359420	25359951	532	Peak_11139	218.975	0.673483	0.275092	0.0143568	0.0902391	chr3R	25341438	25342249	ND-20L	FBgn0039669	-17172	1
	chr3R	25359420	25359951	532	Peak_11139	218.975	0.673483	0.275092	0.0143568	0.0902391	chr3R	25382107	25390966	Dr	FBgn0000492	22157	1
568	chr2R	14285495	14286269	775	Peak_4275	249.609	0.673352	0.220263	0.00223534	0.0246673	chr2R	14284142	14286024	GstE10	FBgn0063499	0	1
	chr2R	14285495	14286269	775	Peak_4275	249.609	0.673352	0.220263	0.00223534	0.0246673	chr2R	14285897	14286728	GstE1	FBgn0034335	0	1
569	chrX	8301673	8301971	299	Peak_12594	153.736	0.672308	0.25647	0.00875729	0.0643885	chrX	8302040	8304131	lawc	FBgn0262976	70	1
	chrX	8301673	8301971	299	Peak_12594	153.736	0.672308	0.25647	0.00875729	0.0643885	chrX	8298567	8301296	PIG-T	FBgn0030035	-378	1
570	chr2R	6987859	6988526	668	Peak_3298	479.103	0.671838	0.205421	0.00107341	0.0147604	chr2R	6865460	6994321	luna	FBgn0040765	0	1
	chr2R	6987859	6988526	668	Peak_3298	479.103	0.671838	0.205421	0.00107341	0.0147604	chr2R	6973090	6975805	CG43188	FBgn0262817	-12055	1
571	chr2R	17248109	17248618	510	Peak_4639	208.464	0.669252	0.262935	0.010918	0.0749039	chr2R	17242519	17266969	cv-2	FBgn0000395	0	2
	chr2R	17248109	17248618	510	Peak_4639	208.464	0.669252	0.262935	0.010918	0.0749039	chr2R	17236449	17238083	CG17974	FBgn0034624	-10027	1
572	chr2L	3855997	3856367	371	Peak_490	111.671	0.668936	0.261902	0.010645	0.0737636	chr2L	3862667	3867507	CG3964	FBgn0031574	6301	1
	chr2L	3855997	3856367	371	Peak_490	111.671	0.668936	0.261902	0.010645	0.0737636	chr2L	3867696	3871425	Cep97	FBgn0031575	11330	1
573	chr2L	14627471	14628016	546	Peak_1743	190.927	0.668849	0.275919	0.0153471	0.0948606	chr2L	14599195	14689340	osp	FBgn0003016	0	3
	chr2L	14627471	14628016	546	Peak_1743	190.927	0.668849	0.275919	0.0153471	0.0948606	chr2L	14615551	14618902	Adh	FBgn0000055	-8570	2
574	chrX	6627463	6628055	593	Peak_12391	196.114	0.668382	0.266503	0.0121426	0.0805099	chrX	6614036	6624566	CG3168	FBgn0029896	-2898	1
	chrX	6627463	6628055	593	Peak_12391	196.114	0.668382	0.266503	0.0121426	0.0805099	chrX	6635569	6638271	RpL17	FBgn0029897	7515	1
575	chrX	4601109	4602043	935	Peak_12183	323.75	0.668275	0.241196	0.00559413	0.0469588	chrX	4599341	4601537	CG7024	FBgn0029722	0	1
	chrX	4601109	4602043	935	Peak_12183	323.75	0.668275	0.241196	0.00559413	0.0469588	chrX	4601948	4622777	Proc-R	FBgn0029723	0	1
576	chr2L	18327024	18327532	509	Peak_2021	316.555	0.667239	0.258788	0.00992812	0.0701518	chr2L	18320101	18390710	Fas3	FBgn0000636	0	1
	chr2L	18327024	18327532	509	Peak_2021	316.555	0.667239	0.258788	0.00992812	0.0701518	chr2L	18309186	18309446	CG43354	FBgn0263086	-17579	1
577	chr3L	8852304	8853021	718	Peak_6341	268.851	0.665838	0.23735	0.00502698	0.043784	chr3L	8820604	8883253	dally	FBgn0263930	0	1
	chr3L	8852304	8853021	718	Peak_6341	268.851	0.665838	0.23735	0.00502698	0.043784	chr3L	8829561	8831943	CG32026	FBgn0052026	-20362	1
578	chrX	17265521	17265743	223	Peak_13608	96.3769	0.665457	0.252226	0.00833139	0.0625189	chrX	17291510	17297311	B-H1	FBgn0011758	25768	1
	chrX	17265521	17265743	223	Peak_13608	96.3769	0.665457	0.252226	0.00833139	0.0625189	chrX	17307299	17316178	CG8611	FBgn0027602	41557	1
579	chr3R	12039793	12040545	753	Peak_9656	311.266	0.663847	0.265665	0.0124611	0.0819302	chr3R	12029915	12030972	mtSSB	FBgn0010438	-8822	6
	chr3R	12039793	12040545	753	Peak_9656	311.266	0.663847	0.265665	0.0124611	0.0819302	chr3R	12029092	12030683	CG31287	FBgn0051287	-9111	1
580	chrX	16687163	16687623	461	Peak_13540	185.411	0.66327	0.249677	0.00789548	0.060135	chrX	16686151	16691775	CG4768	FBgn0030790	0	1
	chrX	16687163	16687623	461	Peak_13540	185.411	0.66327	0.249677	0.00789548	0.060135	chrX	16683437	16685299	Rrp45	FBgn0030789	-1865	1
581	chr3L	16888544	16888903	360	Peak_7398	146.168	0.662497	0.260049	0.0108471	0.0745064	chr3L	16858394	16915587	Lmpt	FBgn0261565	0	4
	chr3L	16888544	16888903	360	Peak_7398	146.168	0.662497	0.260049	0.0108471	0.0745064	chr3L	16870408	16872472	CG32170	FBgn0052170	-16073	3
582	chr2R	19473258	19474350	1093	Peak_4934	339.129	0.661309	0.233206	0.00457206	0.0408796	chr2R	19452413	19487049	apt	FBgn0015903	0	5
	chr2R	19473258	19474350	1093	Peak_4934	339.129	0.661309	0.233206	0.00457206	0.0408796	chr2R	19487048	19488310	CG42559	FBgn0260761	12699	2
583	chr3L	685129	685890	762	Peak_5313	342.052	0.660563	0.214747	0.00209788	0.0236112	chr3L	682884	685549	ebd1	FBgn0035153	0	1
	chr3L	685129	685890	762	Peak_5313	342.052	0.660563	0.214747	0.00209788	0.0236112	chr3L	685941	687958	CG3344	FBgn0035154	52	1
584	chrX	8801409	8801841	433	Peak_12663	296.686	0.660381	0.19124	0.000554092	0.00891085	chrX	8801100	8918969	rdgA	FBgn0261549	0	2
	chrX	8801409	8801841	433	Peak_12663	296.686	0.660381	0.19124	0.000554092	0.00891085	chrX	8798176	8800281	e(r)	FBgn0011586	-1129	1
585	chr3R	22060519	22061669	1151	Peak_10842	390.886	0.659654	0.267034	0.0134999	0.0864399	chr3R	22055969	22060422	CG12290	FBgn0039419	-98	1
	chr3R	22060519	22061669	1151	Peak_10842	390.886	0.659654	0.267034	0.0134999	0.0864399	chr3R	22079790	22087313	Ald	FBgn0000064	18122	1
586	chrX	6442034	6442557	524	Peak_12360	189.648	0.658918	0.274758	0.0164771	0.0990307	chrX	6434803	6479671	CG34417	FBgn0085446	0	1
	chrX	6442034	6442557	524	Peak_12360	189.648	0.658918	0.274758	0.0164771	0.0990307	chrX	6428031	6432608	dx	FBgn0000524	-9427	1
587	chr3L	16794524	16795530	1007	Peak_7376	658.247	0.657494	0.252255	0.00914821	0.0664538	chr3L	16780672	16793289	CG9674	FBgn0036663	-1236	1
	chr3L	16794524	16795530	1007	Peak_7376	658.247	0.657494	0.252255	0.00914821	0.0664538	chr3L	16798093	16812632	nudC	FBgn0021768	2564	4
588	chrX	21102200	21102689	490	Peak_14049	228.005	0.656544	0.23998	0.00622222	0.0506959	chrX	21076336	21152180	CG32521	FBgn0052521	0	2
	chrX	21102200	21102689	490	Peak_14049	228.005	0.656544	0.23998	0.00622222	0.0506959	chrX	21088904	21089862	CG32523	FBgn0052523	-12339	2
589	chr2R	3646122	3646737	616	Peak_2849	265.943	0.655558	0.193893	0.000722149	0.0107682	chr2R	3624523	3632802	CG45093	FBgn0286778	-13321	1
	chr2R	3646122	3646737	616	Peak_2849	265.943	0.655558	0.193893	0.000722149	0.0107682	chr2R	3670301	3672572	cn	FBgn0000337	23565	1
590	chr2L	14495616	14496023	408	Peak_1699	223.569	0.654196	0.209926	0.00183123	0.0215756	chr2L	14490858	14494019	noc	FBgn0005771	-1598	1
	chr2L	14495616	14496023	408	Peak_1699	223.569	0.654196	0.209926	0.00183123	0.0215756	chr2L	14524311	14525656	CG33648	FBgn0053648	28289	1
591	chr2R	7552802	7553421	620	Peak_3405	661.872	0.654001	0.263496	0.0130641	0.0848686	chr2R	7540260	7566859	Roc2	FBgn0044020	0	1
	chr2R	7552802	7553421	620	Peak_3405	661.872	0.654001	0.263496	0.0130641	0.0848686	chr2R	7553272	7562287	Tret1-1	FBgn0050035	0	1
592	chr3L	8689582	8690035	454	Peak_6315	167.658	0.653942	0.253716	0.00995306	0.0702297	chr3L	8668858	8672353	h	FBgn0001168	-17230	1
	chr3L	8689582	8690035	454	Peak_6315	167.658	0.653942	0.253716	0.00995306	0.0702297	chr3L	8712048	8713325	SrpRbeta	FBgn0011509	22014	1
593	chr3R	16890622	16891200	579	Peak_10188	361.718	0.652422	0.197952	0.00098121	0.0137045	chr3R	16890962	16896261	AnxB9	FBgn0000083	0	1
	chr3R	16890622	16891200	579	Peak_10188	361.718	0.652422	0.197952	0.00098121	0.0137045	chr3R	16887401	16890162	Cortactin	FBgn0025865	-461	1
594	chr3L	16806916	16807332	417	Peak_7382	125.41	0.652071	0.249404	0.00893535	0.0653188	chr3L	16798093	16812632	nudC	FBgn0021768	0	4
	chr3L	16806916	16807332	417	Peak_7382	125.41	0.652071	0.249404	0.00893535	0.0653188	chr3L	16802757	16822174	CG13024	FBgn0036665	0	3
595	chr2R	14058678	14060069	1392	Peak_4218	553.249	0.651538	0.178749	0.000267396	0.0051149	chr2R	14055917	14058975	Dgp-1	FBgn0027836	0	1
	chr2R	14058678	14060069	1392	Peak_4218	553.249	0.651538	0.178749	0.000267396	0.0051149	chr2R	14061173	14063230	CG10916	FBgn0034312	1105	1
596	chr2L	8291985	8292822	838	Peak_1016	468.836	0.651052	0.252053	0.00979449	0.0696453	chr2L	8258372	8300746	Btk29A	FBgn0003502	0	3
	chr2L	8291985	8292822	838	Peak_1016	468.836	0.651052	0.252053	0.00979449	0.0696453	chr2L	8301344	8302985	wol	FBgn0261020	8523	2
597	chr3L	70553	71840	1288	Peak_5192	947.226	0.650334	0.205235	0.00153109	0.0190691	chr3L	66429	68995	Lsp1gamma	FBgn0002564	-1559	1
	chr3L	70553	71840	1288	Peak_5192	947.226	0.650334	0.205235	0.00153109	0.0190691	chr3L	73944	75332	CG13405	FBgn0035097	2105	1
598	chr3L	1007617	1008377	761	Peak_5375	296.703	0.649077	0.203574	0.00143061	0.0182683	chr3L	995981	1000567	trio	FBgn0024277	-7051	1
	chr3L	1007617	1008377	761	Peak_5375	296.703	0.649077	0.203574	0.00143061	0.0182683	chr3L	993982	995703	CG12038	FBgn0035179	-11915	1
599	chr2L	20242569	20243072	504	Peak_2266	287.416	0.648235	0.265159	0.0144971	0.090805	chr2L	20255987	20257192	CG17571	FBgn0259998	12916	1
	chr2L	20242569	20243072	504	Peak_2266	287.416	0.648235	0.265159	0.0144971	0.090805	chr2L	20263418	20264424	CG17570	FBgn0260000	20347	1
600	chrX	18298182	18299419	1238	Peak_13749	745.545	0.646205	0.178145	0.000286289	0.00540318	chrX	18284530	18304177	CG32549	FBgn0052549	0	1
	chrX	18298182	18299419	1238	Peak_13749	745.545	0.646205	0.178145	0.000286289	0.00540318	chrX	18293601	18294098	CG34328	FBgn0085357	-4085	1
601	chr2L	16321349	16321751	403	Peak_1869	174.216	0.645782	0.236701	0.00636682	0.0516063	chr2L	16313035	16325625	cact	FBgn0000250	0	1
	chr2L	16321349	16321751	403	Peak_1869	174.216	0.645782	0.236701	0.00636682	0.0516063	chr2L	16327068	16328131	CG4278	FBgn0014092	5318	1
602	chr2L	19071618	19072306	689	Peak_2126	211.298	0.645423	0.193798	0.000867264	0.0125354	chr2L	19071130	19074149	CG17572	FBgn0032753	0	1
	chr2L	19071618	19072306	689	Peak_2126	211.298	0.645423	0.193798	0.000867264	0.0125354	chr2L	19064831	19069851	CG10702	FBgn0032752	-1768	1
603	chr2L	9906933	9908061	1129	Peak_1198	610.045	0.644212	0.247791	0.00932726	0.0671341	chr2L	9903278	9908633	CG13124	FBgn0032156	0	1
	chr2L	9906933	9908061	1129	Peak_1198	610.045	0.644212	0.247791	0.00932726	0.0671341	chr2L	9908829	9912608	Etl1	FBgn0032157	769	1
604	chr3R	17662252	17662742	491	Peak_10321	212.119	0.643422	0.267371	0.0161072	0.0975731	chr3R	17658224	17659735	Gr93a	FBgn0041229	-2518	2
	chr3R	17662252	17662742	491	Peak_10321	212.119	0.643422	0.267371	0.0161072	0.0975731	chr3R	17668242	17669487	Gr93b	FBgn0045470	5501	2
605	chrX	9825869	9826799	931	Peak_12776	282.766	0.642314	0.238638	0.00711134	0.0559721	chrX	9822005	9824981	Idgf4	FBgn0026415	-889	2
	chrX	9825869	9826799	931	Peak_12776	282.766	0.642314	0.238638	0.00711134	0.0559721	chrX	9823921	9824039	snoRNA:Me28S-U1688	FBgn0086044	-1831	2
606	chr3L	15109652	15110019	368	Peak_7134	146.814	0.641954	0.241823	0.00793909	0.0603047	chr3L	15109836	15121129	Cep135	FBgn0036480	0	1
	chr3L	15109652	15110019	368	Peak_7134	146.814	0.641954	0.241823	0.00793909	0.0603047	chr3L	15106656	15109473	CG13458	FBgn0036479	-180	1
607	chr2L	2462057	2462661	605	Peak_326	221.895	0.64174	0.227298	0.0047527	0.042069	chr2L	2428371	2459823	dpp	FBgn0000490	-2235	1
	chr2L	2462057	2462661	605	Peak_326	221.895	0.64174	0.227298	0.0047527	0.042069	chr2L	2488196	2492671	Slh	FBgn0264978	25536	1
608	chr3R	3933682	3934034	353	Peak_8668	128.823	0.640775	0.261671	0.0143341	0.0902391	chr3R	3931053	3948016	puc	FBgn0243512	0	1
	chr3R	3933682	3934034	353	Peak_8668	128.823	0.640775	0.261671	0.0143341	0.0902391	chr3R	3919845	3930805	CG7900	FBgn0037548	-2878	1
609	chr2R	5933141	5933567	427	Peak_3146	156.484	0.640768	0.258834	0.0133016	0.0858592	chr2R	5922099	5936124	oys	FBgn0033476	0	1
	chr2R	5933141	5933567	427	Peak_3146	156.484	0.640768	0.258834	0.0133016	0.0858592	chr2R	5928569	5931012	CG34220	FBgn0085249	-2130	1
610	chr3L	166823	167403	581	Peak_5204	237.04	0.639815	0.245729	0.00922108	0.0667431	chr3L	152883	174517	p130CAS	FBgn0035101	0	1
	chr3L	166823	167403	581	Peak_5204	237.04	0.639815	0.245729	0.00922108	0.0667431	chr3L	175111	176228	CG7049	FBgn0035102	7709	1
611	chr3R	15144853	15145319	467	Peak_10039	178.828	0.636201	0.234432	0.00665165	0.0530331	chr3R	15152675	15152890	hpRNA:CR46343	FBgn0285993	7357	1
	chr3R	15144853	15145319	467	Peak_10039	178.828	0.636201	0.234432	0.00665165	0.0530331	chr3R	15122967	15123417	CG44174	FBgn0265063	-21437	2
612	chr3R	12065039	12065754	716	Peak_9668	209.549	0.635437	0.239062	0.00785945	0.0599574	chr3R	12051372	12086051	tara	FBgn0040071	0	6
	chr3R	12065039	12065754	716	Peak_9668	209.549	0.635437	0.239062	0.00785945	0.0599574	chr3R	12087076	12089817	bor	FBgn0040237	21323	2
613	chr2R	11016638	11017673	1036	Peak_3857	839.486	0.635255	0.227112	0.00515641	0.0446089	chr2R	11002740	11031138	chn	FBgn0015371	0	1
	chr2R	11016638	11017673	1036	Peak_3857	839.486	0.635255	0.227112	0.00515641	0.0446089	chr2R	11032472	11033024	Rpb12	FBgn0262954	14800	1
614	chr3R	14272762	14273478	717	Peak_9921	963.503	0.634171	0.264386	0.0164554	0.0989859	chr3R	14239994	14371308	fru	FBgn0004652	0	8
	chr3R	14272762	14273478	717	Peak_9921	963.503	0.634171	0.264386	0.0164554	0.0989859	chr3R	14235801	14237353	CG10864	FBgn0038621	-35410	8
615	chr2R	18785407	18787066	1660	Peak_4846	915.683	0.634151	0.248507	0.0107155	0.0738462	chr2R	18783696	18804242	nahoda	FBgn0034797	0	1
	chr2R	18785407	18787066	1660	Peak_4846	915.683	0.634151	0.248507	0.0107155	0.0738462	chr2R	18781957	18783268	CG3700	FBgn0034796	-2140	1
616	chrX	21102881	21103257	377	Peak_14050	196.189	0.630255	0.261892	0.0161042	0.0975731	chrX	21076336	21152180	CG32521	FBgn0052521	0	2
	chrX	21102881	21103257	377	Peak_14050	196.189	0.630255	0.261892	0.0161042	0.0975731	chrX	21088904	21089862	CG32523	FBgn0052523	-13020	2
617	chr3L	3307615	3308165	551	Peak_5678	222.883	0.630081	0.249595	0.011589	0.0781221	chr3L	3303707	3313476	ZnT63C	FBgn0035432	0	1
	chr3L	3307615	3308165	551	Peak_5678	222.883	0.630081	0.249595	0.011589	0.0781221	chr3L	3314348	3314681	Drsl2	FBgn0052279	6184	1
618	chr3L	7971758	7972673	916	Peak_6204	629.235	0.62897	0.200587	0.00171479	0.0205426	chr3L	7972145	8043433	nmo	FBgn0011817	0	1
	chr3L	7971758	7972673	916	Peak_6204	629.235	0.62897	0.200587	0.00171479	0.0205426	chr3L	7970904	7971750	CG8038	FBgn0035831	-9	1
619	chr2R	8903011	8903622	612	Peak_3592	628.272	0.628482	0.213074	0.00318187	0.0314758	chr2R	8884005	8895416	Su(z)2	FBgn0265623	-7596	3
	chr2R	8903011	8903622	612	Peak_3592	628.272	0.628482	0.213074	0.00318187	0.0314758	chr2R	8881401	8882127	CG33798	FBgn0053798	-20885	3
620	chr2L	13211824	13212156	333	Peak_1562	125.751	0.628258	0.250594	0.0121736	0.0805644	chr2L	13211924	13212116	snRNA:U2:34ABa	FBgn0004191	0	1
	chr2L	13211824	13212156	333	Peak_1562	125.751	0.628258	0.250594	0.0121736	0.0805644	chr2L	13210772	13211814	CG15482	FBgn0032483	-11	1
621	chr2R	8906607	8907313	707	Peak_3593	458.713	0.627679	0.255528	0.0140338	0.0890003	chr2R	8884005	8895416	Su(z)2	FBgn0265623	-11192	3
	chr2R	8906607	8907313	707	Peak_3593	458.713	0.627679	0.255528	0.0140338	0.0890003	chr2R	8881401	8882127	CG33798	FBgn0053798	-24481	3
622	chr2R	19474424	19475623	1200	Peak_4935	556.761	0.625703	0.210546	0.00296053	0.0297865	chr2R	19452413	19487049	apt	FBgn0015903	0	5
	chr2R	19474424	19475623	1200	Peak_4935	556.761	0.625703	0.210546	0.00296053	0.0297865	chr2R	19487048	19488310	CG42559	FBgn0260761	11426	2
623	chr3L	22830644	22831962	1319	Peak_8156	873.282	0.625633	0.212759	0.003276	0.0322042	chr3L	22830167	22831270	CG11226	FBgn0037195	0	1
	chr3L	22830644	22831962	1319	Peak_8156	873.282	0.625633	0.212759	0.003276	0.0322042	chr3L	22829654	22830170	CG45428	FBgn0266977	-475	1
624	chr2L	9182481	9183701	1221	Peak_1122	913.198	0.624067	0.228896	0.0064026	0.0518072	chr2L	9166777	9247186	tai	FBgn0041092	0	3
	chr2L	9182481	9183701	1221	Peak_1122	913.198	0.624067	0.228896	0.0064026	0.0518072	chr2L	9165420	9166514	CG9586	FBgn0032101	-15968	3
625	chr2R	10368254	10370363	2110	Peak_3782	1638.49	0.624053	0.145869	1.88434e-05	0.000693671	chr2R	10368691	10384817	PRAS40	FBgn0267824	0	1
	chr2R	10368254	10370363	2110	Peak_3782	1638.49	0.624053	0.145869	1.88434e-05	0.000693671	chr2R	10384851	10390993	Cpsf160	FBgn0024698	14489	1
626	chr2R	7817741	7818122	382	Peak_3442	160.77	0.623163	0.247623	0.0118499	0.079389	chr2R	7827061	7854940	exp	FBgn0033668	8940	2
	chr2R	7817741	7818122	382	Peak_3442	160.77	0.623163	0.247623	0.0118499	0.079389	chr2R	7791827	7800284	reb	FBgn0033667	-17458	3
627	chr2L	7023222	7024656	1435	Peak_840	584.29	0.622609	0.187581	0.000902941	0.012854	chr2L	7014622	7023898	ade3	FBgn0000053	0	1
	chr2L	7023222	7024656	1435	Peak_840	584.29	0.622609	0.187581	0.000902941	0.012854	chr2L	7024828	7027389	CG31908	FBgn0051908	173	1
628	chr2L	9657397	9657686	290	Peak_1166	104.799	0.622417	0.235932	0.00833674	0.0625189	chr2L	9656599	9657424	CG33299	FBgn0053299	0	1
	chr2L	9657397	9657686	290	Peak_1166	104.799	0.622417	0.235932	0.00833674	0.0625189	chr2L	9634178	9656026	Apoltp	FBgn0032136	-1372	1
629	chr2L	4594816	4595391	576	Peak_555	483.416	0.621019	0.251782	0.0136441	0.0871729	chr2L	4477461	4591963	dpy	FBgn0053196	-2854	2
	chr2L	4594816	4595391	576	Peak_555	483.416	0.621019	0.251782	0.0136441	0.0871729	chr2L	4577718	4578218	HP6	FBgn0031613	-16599	2
630	chrX	9364098	9364485	388	Peak_12723	153.719	0.620701	0.236409	0.00865129	0.0639504	chrX	9252528	9394162	mgl	FBgn0261260	0	4
	chrX	9364098	9364485	388	Peak_12723	153.719	0.620701	0.236409	0.00865129	0.0639504	chrX	9339847	9340245	CG44815	FBgn0266050	-23854	1
631	chr3L	3300167	3301404	1238	Peak_5676	523.417	0.620133	0.252278	0.0139661	0.0887304	chr3L	3299335	3301142	CG14968	FBgn0035431	0	1
	chr3L	3300167	3301404	1238	Peak_5676	523.417	0.620133	0.252278	0.0139661	0.0887304	chr3L	3299054	3299150	mir-955	FBgn0262269	-1018	1
632	chr2R	7501442	7502250	809	Peak_3387	751.662	0.61945	0.197818	0.00173967	0.0207702	chr2R	7504373	7506528	Egm	FBgn0086712	2124	1
	chr2R	7501442	7502250	809	Peak_3387	751.662	0.61945	0.197818	0.00173967	0.0207702	chr2R	7506983	7520020	CG9005	FBgn0033638	4734	1
633	chr3R	1486040	1486808	769	Peak_8404	282.922	0.619031	0.247067	0.0122272	0.0807305	chr3R	1486356	1490891	Wdr33	FBgn0046222	0	1
	chr3R	1486040	1486808	769	Peak_8404	282.922	0.619031	0.247067	0.0122272	0.0807305	chr3R	1481957	1485634	CG2182	FBgn0037360	-407	1
634	chrX	8316520	8316924	405	Peak_12600	169.462	0.618509	0.221008	0.00513283	0.0444594	chrX	8303304	8324228	Trf2	FBgn0261793	0	1
	chrX	8316520	8316924	405	Peak_12600	169.462	0.618509	0.221008	0.00513283	0.0444594	chrX	8327119	8327842	CG32712	FBgn0052712	10196	1
635	chr3R	12089585	12090162	578	Peak_9679	264.447	0.618165	0.226182	0.00627531	0.0510322	chr3R	12087076	12089817	bor	FBgn0040237	0	2
	chr3R	12089585	12090162	578	Peak_9679	264.447	0.618165	0.226182	0.00627531	0.0510322	chr3R	12089992	12092613	asun	FBgn0020407	0	1
636	chr2R	14117104	14118249	1146	Peak_4232	652.009	0.613526	0.217562	0.00480235	0.0423758	chr2R	14120265	14123816	fj	FBgn0000658	2017	1
	chr2R	14117104	14118249	1146	Peak_4232	652.009	0.613526	0.217562	0.00480235	0.0423758	chr2R	14095259	14096483	CG30114	FBgn0050114	-20622	2
637	chr3L	9688280	9688784	505	Peak_6433	310.14	0.613486	0.219012	0.00509197	0.0441866	chr3L	9676678	9687557	CG6767	FBgn0036030	-724	1
	chr3L	9688280	9688784	505	Peak_6433	310.14	0.613486	0.219012	0.00509197	0.0441866	chr3L	9691435	9692979	Ubc4	FBgn0015321	2652	1
638	chrX	1055988	1056301	314	Peak_11688	136.393	0.613211	0.24747	0.0132152	0.0854968	chrX	1052631	1056422	eIF4E7	FBgn0040368	0	1
	chrX	1055988	1056301	314	Peak_11688	136.393	0.613211	0.24747	0.0132152	0.0854968	chrX	1064860	1066773	CG11378	FBgn0040364	8560	1
639	chr2R	13814474	13815032	559	Peak_4199	243.986	0.612249	0.245714	0.0127126	0.0831716	chr2R	13761443	13814045	Elk	FBgn0011589	-430	2
	chr2R	13814474	13815032	559	Peak_4199	243.986	0.612249	0.245714	0.0127126	0.0831716	chr2R	13842900	13844075	PpY-55A	FBgn0003140	27869	2
640	chr2R	13323121	13323579	459	Peak_4125	275.161	0.611434	0.228254	0.0073899	0.057651	chr2R	13319677	13332443	EDTP	FBgn0027506	0	1
	chr2R	13323121	13323579	459	Peak_4125	275.161	0.611434	0.228254	0.0073899	0.057651	chr2R	13318536	13319724	Lhr	FBgn0034217	-3398	1
641	chrX	3345232	3345727	496	Peak_12027	249.614	0.609652	0.253716	0.016266	0.0982633	chrX	3281976	3342976	CG12535	FBgn0029657	-2257	3
	chrX	3345232	3345727	496	Peak_12027	249.614	0.609652	0.253716	0.016266	0.0982633	chrX	3353048	3354273	CG16782	FBgn0029659	7322	1
642	chr3R	26172857	26173419	563	Peak_11272	251.934	0.609417	0.252754	0.015904	0.0970304	chr3R	26211294	26213900	Fer1HCH	FBgn0015222	37876	1
	chr3R	26172857	26173419	563	Peak_11272	251.934	0.609417	0.252754	0.015904	0.0970304	chr3R	26213525	26216131	Fer2LCH	FBgn0015221	40107	1
643	chr3L	16908999	16909460	462	Peak_7401	258.954	0.609115	0.242483	0.0120051	0.0799826	chr3L	16858394	16915587	Lmpt	FBgn0261565	0	4
	chr3L	16908999	16909460	462	Peak_7401	258.954	0.609115	0.242483	0.0120051	0.0799826	chr3L	16916351	16917094	CG13028	FBgn0036676	6892	1
644	chr2L	9175223	9175541	319	Peak_1119	163.449	0.608772	0.223435	0.00643788	0.0519737	chr2L	9166777	9247186	tai	FBgn0041092	0	3
	chr2L	9175223	9175541	319	Peak_1119	163.449	0.608772	0.223435	0.00643788	0.0519737	chr2L	9165420	9166514	CG9586	FBgn0032101	-8710	3
645	chr2R	16048592	16049254	663	Peak_4505	353.957	0.608742	0.246999	0.0137185	0.087511	chr2R	16033622	16034329	CG11041	FBgn0034481	-14264	3
	chr2R	16048592	16049254	663	Peak_4505	353.957	0.608742	0.246999	0.0137185	0.087511	chr2R	15999015	16004437	18w	FBgn0004364	-44156	2
646	chr3L	881682	882356	675	Peak_5370	289.61	0.60805	0.213129	0.00433125	0.0391661	chr3L	871898	893520	Usp10	FBgn0052479	0	1
	chr3L	881682	882356	675	Peak_5370	289.61	0.60805	0.213129	0.00433125	0.0391661	chr3L	877290	881045	CG13907	FBgn0035173	-638	1
647	chr2L	16520114	16521861	1748	Peak_1897	1095.4	0.607132	0.158275	0.000125089	0.00298693	chr2L	16508077	16532877	CG5953	FBgn0032587	0	1
	chr2L	16520114	16521861	1748	Peak_1897	1095.4	0.607132	0.158275	0.000125089	0.00298693	chr2L	16528374	16528491	mir-4943	FBgn0263555	6514	1
648	chr2R	2902358	2903608	1251	Peak_2728	403.675	0.606511	0.192969	0.00167203	0.020167	chr2R	2899758	2905867	Tsp42Ee	FBgn0029506	0	1
	chr2R	2902358	2903608	1251	Peak_2728	403.675	0.606511	0.192969	0.00167203	0.020167	chr2R	2906264	2906895	CG43646	FBgn0263655	2657	1
649	chr2R	5452322	5453700	1379	Peak_3087	1434.18	0.605617	0.234977	0.00995616	0.0702297	chr2R	5453650	5466512	Not1	FBgn0085436	0	1
	chr2R	5452322	5453700	1379	Peak_3087	1434.18	0.605617	0.234977	0.00995616	0.0702297	chr2R	5449142	5451376	CG1809	FBgn0033423	-947	1
650	chr3R	7575209	7576070	862	Peak_9136	364.371	0.605336	0.177416	0.000644972	0.00994256	chr3R	7569950	7575210	CG6923	FBgn0037944	0	1
	chr3R	7575209	7576070	862	Peak_9136	364.371	0.605336	0.177416	0.000644972	0.00994256	chr3R	7576054	7576638	CG43062	FBgn0262364	0	1
651	chrX	3666633	3667905	1273	Peak_12063	861.722	0.604055	0.184318	0.00104826	0.014542	chrX	3614039	3681002	Tlk	FBgn0283657	0	4
	chrX	3666633	3667905	1273	Peak_12063	861.722	0.604055	0.184318	0.00104826	0.014542	chrX	3671414	3671538	mir-4962	FBgn0263532	3510	4
652	chrX	13172663	13173062	400	Peak_13130	218.242	0.603746	0.235876	0.0104795	0.0727593	chrX	13156719	13179665	HDAC4	FBgn0041210	0	1
	chrX	13172663	13173062	400	Peak_13130	218.242	0.603746	0.235876	0.0104795	0.0727593	chrX	13179739	13181774	CG15743	FBgn0030465	6678	1
653	chr3L	680338	680542	205	Peak_5311	138.345	0.601142	0.245506	0.0143418	0.0902391	chr3L	680435	682061	CG3386	FBgn0035152	0	1
	chr3L	680338	680542	205	Peak_5311	138.345	0.601142	0.245506	0.0143418	0.0902391	chr3L	677878	680326	CG17129	FBgn0035151	-13	1
654	chrX	3671127	3671698	572	Peak_12065	409.753	0.600863	0.193882	0.00194102	0.0224903	chrX	3614039	3681002	Tlk	FBgn0283657	0	4
	chrX	3671127	3671698	572	Peak_12065	409.753	0.600863	0.193882	0.00194102	0.0224903	chrX	3671414	3671538	mir-4962	FBgn0263532	0	4
655	chrX	6747259	6747805	547	Peak_12412	268.973	0.600767	0.240758	0.0125846	0.0826272	chrX	6745941	6746671	CG14434	FBgn0029915	-589	4
	chrX	6747259	6747805	547	Peak_12412	268.973	0.600767	0.240758	0.0125846	0.0826272	chrX	6743802	6745917	CG4558	FBgn0029914	-1343	1
656	chr3R	14299094	14300562	1469	Peak_9929	1654.08	0.600701	0.209508	0.0041413	0.0380633	chr3R	14239994	14371308	fru	FBgn0004652	0	8
	chr3R	14299094	14300562	1469	Peak_9929	1654.08	0.600701	0.209508	0.0041413	0.0380633	chr3R	14235801	14237353	CG10864	FBgn0038621	-61742	8
657	chr3R	10198484	10199667	1184	Peak_9428	877.143	0.599399	0.204721	0.00341285	0.0330439	chr3R	10197396	10197468	snoRNA:Me18S-G1189	FBgn0086058	-1017	1
	chr3R	10198484	10199667	1184	Peak_9428	877.143	0.599399	0.204721	0.00341285	0.0330439	chr3R	10155134	10195730	NK7.1	FBgn0024321	-2755	1
658	chrX	17698058	17699051	994	Peak_13674	424.012	0.597195	0.233017	0.0103808	0.0722514	chrX	17685042	17708044	OdsH	FBgn0026058	0	2
	chrX	17698058	17699051	994	Peak_13674	424.012	0.597195	0.233017	0.0103808	0.0722514	chrX	17713187	17713718	CG12986	FBgn0030868	14137	2
659	chrX	3644082	3645709	1628	Peak_12058	1188.32	0.595364	0.223698	0.00778017	0.0595777	chrX	3614039	3681002	Tlk	FBgn0283657	0	4
	chrX	3644082	3645709	1628	Peak_12058	1188.32	0.595364	0.223698	0.00778017	0.0595777	chrX	3671414	3671538	mir-4962	FBgn0263532	25706	4
660	chr2L	9895371	9895952	582	Peak_1195	176.56	0.591058	0.241408	0.0143499	0.0902391	chr2L	9895286	9896104	Bka	FBgn0010520	0	1
	chr2L	9895371	9895952	582	Peak_1195	176.56	0.591058	0.241408	0.0143499	0.0902391	chr2L	9896264	9897521	RpS2	FBgn0004867	313	1
661	chr3L	626308	627395	1088	Peak_5293	814.47	0.58966	0.192508	0.00219104	0.024407	chr3L	620694	622316	CG43337	FBgn0263042	-3993	2
	chr3L	626308	627395	1088	Peak_5293	814.47	0.58966	0.192508	0.00219104	0.024407	chr3L	642207	642288	ban	FBgn0262451	14813	2
662	chr2R	5747371	5748553	1183	Peak_3119	738.569	0.588319	0.234226	0.0120133	0.0799826	chr2R	5738207	5748264	PCB	FBgn0027580	0	1
	chr2R	5747371	5748553	1183	Peak_3119	738.569	0.588319	0.234226	0.0120133	0.0799826	chr2R	5751068	5752081	CG30010	FBgn0050010	2516	1
663	chr4	1000293	1001106	814	Peak_11545	571.11	0.588284	0.206644	0.00441544	0.0397558	chr4	995793	996436	sphinx	FBgn0083990	-3858	1
	chr4	1000293	1001106	814	Peak_11545	571.11	0.588284	0.206644	0.00441544	0.0397558	chr4	1010350	1026914	toy	FBgn0019650	9245	1
664	chr2L	12504874	12505308	435	Peak_1472	212.365	0.586225	0.210127	0.00527309	0.045176	chr2L	12455539	12546611	bun	FBgn0259176	0	3
	chr2L	12504874	12505308	435	Peak_1472	212.365	0.586225	0.210127	0.00527309	0.045176	chr2L	12508107	12508254	snoRNA:CG43051-a	FBgn0263458	2800	2
665	chr2L	19423381	19424191	811	Peak_2177	399.625	0.586162	0.211811	0.00565092	0.0472671	chr2L	19424049	19429224	CG16771	FBgn0032779	0	1
	chr2L	19423381	19424191	811	Peak_2177	399.625	0.586162	0.211811	0.00565092	0.0472671	chr2L	19424049	19430270	CG13085	FBgn0032780	0	1
666	chrX	6177392	6177923	532	Peak_12328	240.66	0.576162	0.214417	0.00720734	0.0566016	chrX	6176069	6177608	CG11700	FBgn0029856	0	1
	chrX	6177392	6177923	532	Peak_12328	240.66	0.576162	0.214417	0.00720734	0.0566016	chrX	6178170	6182023	Top3beta	FBgn0026015	248	1
667	chr3L	11480312	11481132	821	Peak_6685	575.347	0.574278	0.207406	0.00562538	0.0471371	chr3L	11480649	11492155	chrb	FBgn0036165	0	1
	chr3L	11480312	11481132	821	Peak_6685	575.347	0.574278	0.207406	0.00562538	0.0471371	chr3L	11468057	11468652	Vha16-2	FBgn0028668	-11661	1
668	chr3R	22896840	22897362	523	Peak_10916	183.469	0.573011	0.199271	0.00403338	0.0373377	chr3R	22890711	22895792	spz	FBgn0003495	-1049	1
	chr3R	22896840	22897362	523	Peak_10916	183.469	0.573011	0.199271	0.00403338	0.0373377	chr3R	22901591	22908540	CG14257	FBgn0039479	4230	1
669	chr3R	7515595	7516099	505	Peak_9133	297.594	0.572545	0.214935	0.00772614	0.0592281	chr3R	7514102	7515678	CG6908	FBgn0037936	0	1
	chr3R	7515595	7516099	505	Peak_9133	297.594	0.572545	0.214935	0.00772614	0.0592281	chr3R	7516107	7517521	CG18765	FBgn0042110	9	1
670	chrX	9380037	9381015	979	Peak_12727	535.378	0.571552	0.235177	0.015086	0.0936976	chrX	9252528	9394162	mgl	FBgn0261260	0	4
	chrX	9380037	9381015	979	Peak_12727	535.378	0.571552	0.235177	0.015086	0.0936976	chrX	9396858	9444871	CG32700	FBgn0267253	15844	3
671	chr2R	7126736	7127016	281	Peak_3324	98.5358	0.570744	0.238183	0.0165642	0.0993431	chr2R	7126998	7127619	CG13215	FBgn0033592	0	1
	chr2R	7126736	7127016	281	Peak_3324	98.5358	0.570744	0.238183	0.0165642	0.0993431	chr2R	7125612	7126500	CG13216	FBgn0033591	-237	1
672	chr2L	3477699	3478861	1163	Peak_428	684.241	0.570617	0.227036	0.0119596	0.0798964	chr2L	3478433	3479612	Thor	FBgn0261560	0	1
	chr2L	3477699	3478861	1163	Peak_428	684.241	0.570617	0.227036	0.0119596	0.0798964	chr2L	3480754	3491071	CG15414	FBgn0031542	1894	1
673	chr2R	6305406	6306453	1048	Peak_3195	659.494	0.569737	0.233173	0.0145491	0.091003	chr2R	6306222	6307266	Prx2540-2	FBgn0033518	0	1
	chr2R	6305406	6306453	1048	Peak_3195	659.494	0.569737	0.233173	0.0145491	0.091003	chr2R	6307918	6309413	CG11825	FBgn0033519	1466	1
674	chr2L	426125	426776	652	Peak_68	235.809	0.569258	0.22593	0.0117482	0.0789317	chr2L	422872	425321	BBS8	FBgn0031255	-805	1
	chr2L	426125	426776	652	Peak_68	235.809	0.569258	0.22593	0.0117482	0.0789317	chr2L	421770	422489	CG13692	FBgn0031254	-3637	1
675	chrX	14841016	14842267	1252	Peak_13308	721.147	0.567845	0.222874	0.0108394	0.0744898	chrX	14827702	14846042	pdgy	FBgn0027601	0	1
	chrX	14841016	14842267	1252	Peak_13308	721.147	0.567845	0.222874	0.0108394	0.0744898	chrX	14848155	14849133	CG9030	FBgn0030599	5889	1
676	chr2L	18677030	18677776	747	Peak_2069	334.946	0.567525	0.203352	0.00525704	0.045111	chr2L	18677220	18683715	CG31751	FBgn0086909	0	1
	chr2L	18677030	18677776	747	Peak_2069	334.946	0.567525	0.203352	0.00525704	0.045111	chr2L	18675182	18676998	Mst36Fa	FBgn0086681	-33	1
677	chr3R	17478490	17478909	420	Peak_10294	240.23	0.567176	0.215104	0.00837029	0.062704	chr3R	17486907	17488694	Archease	FBgn0038893	7999	1
	chr3R	17478490	17478909	420	Peak_10294	240.23	0.567176	0.215104	0.00837029	0.062704	chr3R	17490110	17492398	CG15497	FBgn0038894	11202	1
678	chr3R	20881742	20882921	1180	Peak_10702	541.09	0.566034	0.20325	0.0053542	0.0456496	chr3R	20880797	20881899	CG31111	FBgn0051111	0	1
	chr3R	20881742	20882921	1180	Peak_10702	541.09	0.566034	0.20325	0.0053542	0.0456496	chr3R	20882007	20890070	stac	FBgn0266719	0	1
679	chr3R	7638481	7639074	594	Peak_9147	212.475	0.56392	0.216382	0.00915713	0.0664844	chr3R	7640927	7645061	glo	FBgn0259139	1854	1
	chr3R	7638481	7639074	594	Peak_9147	212.475	0.56392	0.216382	0.00915713	0.0664844	chr3R	7645080	7646021	COX5A	FBgn0019624	6007	1
680	chr3L	629551	630296	746	Peak_5296	357.98	0.562499	0.224234	0.0121231	0.0805022	chr3L	620694	622316	CG43337	FBgn0263042	-7236	2
	chr3L	629551	630296	746	Peak_5296	357.98	0.562499	0.224234	0.0121231	0.0805022	chr3L	642207	642288	ban	FBgn0262451	11912	2
681	chr3R	14273675	14275073	1399	Peak_9922	1825.13	0.561654	0.221512	0.011227	0.0765213	chr3R	14239994	14371308	fru	FBgn0004652	0	8
	chr3R	14273675	14275073	1399	Peak_9922	1825.13	0.561654	0.221512	0.011227	0.0765213	chr3R	14235801	14237353	CG10864	FBgn0038621	-36323	8
682	chrX	11510136	11510758	623	Peak_12958	270.316	0.561146	0.230928	0.0151004	0.093746	chrX	11510156	11513981	Met	FBgn0002723	0	3
	chrX	11510136	11510758	623	Peak_12958	270.316	0.561146	0.230928	0.0151004	0.093746	chrX	11509129	11509873	RPA3	FBgn0266421	-264	1
683	chrX	2919813	2920244	432	Peak_11959	252.573	0.560534	0.209444	0.00744404	0.0578499	chrX	2634416	3026824	kirre	FBgn0028369	0	5
	chrX	2919813	2920244	432	Peak_11959	252.573	0.560534	0.209444	0.00744404	0.0578499	chrX	2960647	2961595	CG4116	FBgn0029649	40404	1
684	chr3L	16030185	16030551	367	Peak_7251	126.73	0.559062	0.228442	0.0143939	0.0903918	chr3L	16028584	16030327	CG5895	FBgn0036560	0	1
	chr3L	16030185	16030551	367	Peak_7251	126.73	0.559062	0.228442	0.0143939	0.0903918	chr3L	16031509	16039946	Diap1	FBgn0260635	959	2
685	chr2L	5151098	5151860	763	Peak_623	305.657	0.557662	0.213528	0.00901039	0.065689	chr2L	5100876	5205389	Msp300	FBgn0261836	0	1
	chr2L	5151098	5151860	763	Peak_623	305.657	0.557662	0.213528	0.00901039	0.065689	chr2L	5187777	5187922	snoRNA:Psi28S-2263	FBgn0082990	35918	1
686	chr3L	16996585	16997242	658	Peak_7416	260.799	0.557133	0.224458	0.0130602	0.0848686	chr3L	16987816	16995460	CG3764	FBgn0036684	-1126	1
	chr3L	16996585	16997242	658	Peak_7416	260.799	0.557133	0.224458	0.0130602	0.0848686	chr3L	16991556	16991624	mir-2500	FBgn0262189	-4962	1
687	chrX	11814828	11815519	692	Peak_13004	457.18	0.556583	0.209046	0.0077565	0.0594286	chrX	11814036	11818695	Sclp	FBgn0030357	0	1
	chrX	11814828	11815519	692	Peak_13004	457.18	0.556583	0.209046	0.0077565	0.0594286	chrX	11801441	11811293	pot	FBgn0250871	-3536	1
688	chr2R	14664741	14665147	407	Peak_4331	205.346	0.55657	0.226649	0.0140632	0.0891469	chr2R	14663173	14664483	CG15093	FBgn0034390	-259	1
	chr2R	14664741	14665147	407	Peak_4331	205.346	0.55657	0.226649	0.0140632	0.0891469	chr2R	14649262	14662172	Mctp	FBgn0034389	-2570	1
689	chrX	255455	255859	405	Peak_11589	177.163	0.556011	0.225719	0.0137668	0.0877403	chrX	210608	322284	CG32816	FBgn0052816	0	1
	chrX	255455	255859	405	Peak_11589	177.163	0.556011	0.225719	0.0137668	0.0877403	chrX	250541	255278	y	FBgn0004034	-178	1
690	chrX	12797111	12797693	583	Peak_13093	297.402	0.555606	0.191888	0.00378591	0.0356547	chrX	12795385	12797549	CG4407	FBgn0030431	0	1
	chrX	12797111	12797693	583	Peak_13093	297.402	0.555606	0.191888	0.00378591	0.0356547	chrX	12797777	12800051	CG4404	FBgn0030432	85	1
691	chrX	17551208	17553446	2239	Peak_13648	1381.77	0.555586	0.157826	0.000431155	0.00736978	chrX	17551404	17563404	beta-Spec	FBgn0250788	0	1
	chrX	17551208	17553446	2239	Peak_13648	1381.77	0.555586	0.157826	0.000431155	0.00736978	chrX	17546793	17550851	IntS2	FBgn0030858	-358	1
692	chr2L	19546754	19547537	784	Peak_2198	290.854	0.553695	0.178817	0.00195859	0.0226198	chr2L	19545375	19546959	CG10337	FBgn0032805	0	1
	chr2L	19546754	19547537	784	Peak_2198	290.854	0.553695	0.178817	0.00195859	0.0226198	chr2L	19548506	19556451	Tep4	FBgn0041180	970	1
693	chr3L	9454774	9456288	1515	Peak_6412	999.878	0.55313	0.164729	0.000785617	0.0115322	chr3L	9454149	9468575	CG44838	FBgn0266101	0	1
	chr3L	9454774	9456288	1515	Peak_6412	999.878	0.55313	0.164729	0.000785617	0.0115322	chr3L	9452468	9453899	CG3434	FBgn0036000	-876	1
694	chr4	523092	523742	651	Peak_11507	271.768	0.550922	0.190577	0.00384251	0.0360096	chr4	522435	560418	zfh2	FBgn0004607	0	1
	chr4	523092	523742	651	Peak_11507	271.768	0.550922	0.190577	0.00384251	0.0360096	chr4	490034	506659	Asator	FBgn0039908	-16434	1
695	chr2R	11418991	11419985	995	Peak_3906	390.813	0.550385	0.196913	0.00518881	0.0448039	chr2R	11403282	11419764	Khc-73	FBgn0019968	0	1
	chr2R	11418991	11419985	995	Peak_3906	390.813	0.550385	0.196913	0.00518881	0.0448039	chr2R	11421024	11425287	CG30471	FBgn0050471	1040	1
696	chr3R	21849748	21850728	981	Peak_10806	439.832	0.549683	0.218401	0.0118409	0.0793684	chr3R	21849542	21850301	E(spl)m4-BFM	FBgn0002629	0	1
	chr3R	21849748	21850728	981	Peak_10806	439.832	0.549683	0.218401	0.0118409	0.0793684	chr3R	21847544	21848849	E(spl)m3-HLH	FBgn0002609	-900	1
697	chr2L	2858052	2858459	408	Peak_363	221.234	0.547004	0.199846	0.00619775	0.0505548	chr2L	2857163	2868548	CG2991	FBgn0031474	0	2
	chr2L	2858052	2858459	408	Peak_363	221.234	0.547004	0.199846	0.00619775	0.0505548	chr2L	2856069	2856705	RpS21	FBgn0015521	-1348	2
698	chrX	7826915	7827896	982	Peak_12541	511.923	0.546444	0.206926	0.00827176	0.0623292	chrX	7825777	7827365	CG10778	FBgn0029980	0	1
	chrX	7826915	7827896	982	Peak_12541	511.923	0.546444	0.206926	0.00827176	0.0623292	chrX	7827774	7828710	RpS14a	FBgn0004403	0	1
699	chr3L	16374535	16374919	385	Peak_7316	169.313	0.54567	0.197392	0.0057029	0.0475612	chr3L	16372073	16374670	CG4753	FBgn0036622	0	1
	chr3L	16374535	16374919	385	Peak_7316	169.313	0.54567	0.197392	0.0057029	0.0475612	chr3L	16374871	16378909	CG4729	FBgn0036623	0	1
700	chr3L	20502183	20503164	982	Peak_7850	559.035	0.545373	0.189374	0.00397847	0.0369754	chr3L	20490422	20504158	CG32425	FBgn0052425	0	1
	chr3L	20502183	20503164	982	Peak_7850	559.035	0.545373	0.189374	0.00397847	0.0369754	chr3L	20499131	20500475	CG5078	FBgn0037005	-1709	1
701	chr3L	19009173	19010107	935	Peak_7675	504.577	0.544708	0.223515	0.0148093	0.092263	chr3L	18996840	19038549	nkd	FBgn0002945	0	1
	chr3L	19009173	19010107	935	Peak_7675	504.577	0.544708	0.223515	0.0148093	0.092263	chr3L	18994084	18996352	SmydA-2	FBgn0036839	-12822	1
702	chrX	2035229	2036218	990	Peak_11835	575.693	0.543832	0.174227	0.00179998	0.0213461	chrX	2035521	2038970	D2hgdh	FBgn0023507	0	2
	chrX	2035229	2036218	990	Peak_11835	575.693	0.543832	0.174227	0.00179998	0.0213461	chrX	2039168	2042599	Pgd	FBgn0004654	2951	2
703	chr2R	14706764	14707357	594	Peak_4339	183.763	0.54268	0.20292	0.0074874	0.0580684	chr2R	14706971	14709344	Phb2	FBgn0010551	0	1
	chr2R	14706764	14707357	594	Peak_4339	183.763	0.54268	0.20292	0.0074874	0.0580684	chr2R	14709692	14717204	CG15097	FBgn0034396	2336	1
704	chr3L	10667153	10667709	557	Peak_6517	494.215	0.542651	0.211138	0.0101662	0.0713102	chr3L	10657838	10683834	simj	FBgn0010762	0	1
	chr3L	10667153	10667709	557	Peak_6517	494.215	0.542651	0.211138	0.0101662	0.0713102	chr3L	10656475	10657535	Adi1	FBgn0052068	-9619	1
705	chr3L	7847784	7848935	1152	Peak_6187	729.941	0.541302	0.162418	0.000859827	0.0124662	chr3L	7804557	7848648	Pdp1	FBgn0016694	0	2
	chr3L	7847784	7848935	1152	Peak_6187	729.941	0.541302	0.162418	0.000859827	0.0124662	chr3L	7862141	7887914	CG32365	FBgn0052365	13207	1
706	chr3L	7351899	7353381	1483	Peak_6140	539.327	0.540241	0.22514	0.0164139	0.0988192	chr3L	7350374	7353216	pst	FBgn0035770	0	1
	chr3L	7351899	7353381	1483	Peak_6140	539.327	0.540241	0.22514	0.0164139	0.0988192	chr3L	7353660	7357466	Sec63	FBgn0035771	280	1
707	chr3R	25517538	25518247	710	Peak_11160	253.984	0.53759	0.217014	0.0132415	0.0855879	chr3R	25518312	25522747	dmrt99B	FBgn0039683	66	1
	chr3R	25517538	25518247	710	Peak_11160	253.984	0.53759	0.217014	0.0132415	0.0855879	chr3R	25511457	25515033	Obp99c	FBgn0039682	-2506	1
708	chr3R	21384995	21385390	396	Peak_10759	154.712	0.536969	0.216378	0.0130786	0.0848947	chr3R	21341839	21434145	msi	FBgn0011666	0	2
	chr3R	21384995	21385390	396	Peak_10759	154.712	0.536969	0.216378	0.0130786	0.0848947	chr3R	21406944	21408901	CG4582	FBgn0039344	21555	1
709	chr3R	5399036	5400432	1397	Peak_8888	606.774	0.53561	0.180939	0.00307475	0.030691	chr3R	5397632	5399933	CG9399	FBgn0037715	0	1
	chr3R	5399036	5400432	1397	Peak_8888	606.774	0.53561	0.180939	0.00307475	0.030691	chr3R	5400205	5403455	Kap-alpha3	FBgn0027338	0	1
710	chr3L	11529592	11530702	1111	Peak_6690	460.11	0.534843	0.220194	0.015142	0.0939217	chr3L	11515856	11546212	Mob2	FBgn0259481	0	1
	chr3L	11529592	11530702	1111	Peak_6690	460.11	0.534843	0.220194	0.015142	0.0939217	chr3L	11511897	11515813	CG11714	FBgn0036170	-13780	1
711	chrX	13024832	13025973	1142	Peak_13107	1248.87	0.533761	0.211567	0.0116394	0.0783499	chrX	13025025	13028872	MFS10	FBgn0030452	0	1
	chrX	13024832	13025973	1142	Peak_13107	1248.87	0.533761	0.211567	0.0116394	0.0783499	chrX	13022984	13024323	CG15717	FBgn0030451	-510	1
712	chr2L	2885722	2887125	1404	Peak_369	850.354	0.533441	0.209137	0.0107515	0.0739934	chr2L	2885928	2952511	lilli	FBgn0041111	0	3
	chr2L	2885722	2887125	1404	Peak_369	850.354	0.533441	0.209137	0.0107515	0.0739934	chr2L	2880703	2885214	NTPase	FBgn0024947	-509	1
713	chr2R	7037356	7037772	417	Peak_3305	204.078	0.533146	0.218237	0.0145672	0.0910352	chr2R	7026808	7059711	CG13229	FBgn0033579	0	3
	chr2R	7037356	7037772	417	Peak_3305	204.078	0.533146	0.218237	0.0145672	0.0910352	chr2R	7035106	7037573	CG12391	FBgn0033581	0	1
714	chrX	18820812	18821331	520	Peak_13817	203.543	0.531335	0.207377	0.010402	0.0723281	chrX	18824367	18922662	CG43759	FBgn0264090	3037	4
	chrX	18820812	18821331	520	Peak_13817	203.543	0.531335	0.207377	0.010402	0.0723281	chrX	18794442	18804091	CG7378	FBgn0030976	-16722	4
715	chr3R	20391160	20391901	742	Peak_10641	370.191	0.521467	0.215456	0.0155079	0.0953956	chr3R	20383089	20408586	REPTOR	FBgn0039209	0	1
	chr3R	20391160	20391901	742	Peak_10641	370.191	0.521467	0.215456	0.0155079	0.0953956	chr3R	20370440	20382271	Esyt2	FBgn0266758	-8890	2
716	chrX	13518278	13519822	1545	Peak_13179	1406.81	0.520416	0.185155	0.00494327	0.0432681	chrX	13513308	13518441	CG2691	FBgn0030504	0	1
	chrX	13518278	13519822	1545	Peak_13179	1406.81	0.520416	0.185155	0.00494327	0.0432681	chrX	13518777	13557690	NFAT	FBgn0030505	0	1
717	chr2R	12697806	12698663	858	Peak_4063	275.517	0.519803	0.212051	0.0142339	0.0899062	chr2R	12704093	12705082	CG5550	FBgn0034160	5431	1
	chr2R	12697806	12698663	858	Peak_4063	275.517	0.519803	0.212051	0.0142339	0.0899062	chr2R	12712168	12714153	CG34459	FBgn0085488	13506	1
718	chr3R	10522299	10523313	1015	Peak_9478	928.109	0.517005	0.17187	0.00262867	0.0276069	chr3R	10490628	10523014	Meltrin	FBgn0265140	0	3
	chr3R	10522299	10523313	1015	Peak_9478	928.109	0.517005	0.17187	0.00262867	0.0276069	chr3R	10523410	10549983	kibra	FBgn0262127	98	3
719	chr3R	4496605	4497172	568	Peak_8747	215.258	0.516121	0.213338	0.0155517	0.0954992	chr3R	4493589	4499424	CG8036	FBgn0037607	0	1
	chr3R	4496605	4497172	568	Peak_8747	215.258	0.516121	0.213338	0.0155517	0.0954992	chr3R	4499830	4500918	mRpL19	FBgn0037608	2659	1
720	chr3L	16043959	16044441	483	Peak_7257	304.532	0.515884	0.194101	0.00786506	0.0599679	chr3L	16045058	16075126	Mbs	FBgn0005536	618	1
	chr3L	16043959	16044441	483	Peak_7257	304.532	0.515884	0.194101	0.00786506	0.0599679	chr3L	16031509	16039946	Diap1	FBgn0260635	-4014	2
721	chrX	4891317	4892564	1248	Peak_12195	471.903	0.514647	0.192166	0.00740338	0.0576931	chrX	4891473	4892270	CG12680	FBgn0029740	0	2
	chrX	4891317	4892564	1248	Peak_12195	471.903	0.514647	0.192166	0.00740338	0.0576931	chrX	4853961	4855161	CG15468	FBgn0061196	-36157	1
722	chr2R	4778550	4779328	779	Peak_2987	342.062	0.511234	0.208984	0.0144339	0.0905627	chr2R	4775908	4778906	CG8272	FBgn0033337	0	1
	chr2R	4778550	4779328	779	Peak_2987	342.062	0.511234	0.208984	0.0144339	0.0905627	chr2R	4779336	4780844	DCTN2-p50	FBgn0021825	9	1
723	chr2L	540015	541265	1251	Peak_97	819.075	0.50988	0.20352	0.0122346	0.0807417	chr2L	476219	540532	ush	FBgn0003963	0	4
	chr2L	540015	541265	1251	Peak_97	819.075	0.50988	0.20352	0.0122346	0.0807417	chr2L	540598	542580	lwr	FBgn0010602	0	3
724	chrX	18586709	18587561	853	Peak_13786	454.701	0.507275	0.200563	0.0114307	0.0774613	chrX	18582570	18587075	Cyp18a1	FBgn0010383	0	1
	chrX	18586709	18587561	853	Peak_13786	454.701	0.507275	0.200563	0.0114307	0.0774613	chrX	18601526	18620605	CCKLR-17D1	FBgn0259231	13966	1
725	chr2L	6085495	6086257	763	Peak_730	791.914	0.506379	0.209632	0.0157109	0.0962257	chr2L	6082602	6096498	Kr-h1	FBgn0266450	0	1
	chr2L	6085495	6086257	763	Peak_730	791.914	0.506379	0.209632	0.0157109	0.0962257	chr2L	6096697	6098966	CG9175	FBgn0031779	10441	1
726	chr2R	20560168	20561428	1261	Peak_5101	670.618	0.505135	0.197892	0.0106927	0.0738462	chr2R	20558816	20572613	Mmp1	FBgn0035049	0	2
	chr2R	20560168	20561428	1261	Peak_5101	670.618	0.505135	0.197892	0.0106927	0.0738462	chr2R	20556919	20559100	Pof	FBgn0035047	-1069	1
727	chr3R	5243311	5245400	2090	Peak_8865	1675.21	0.50449	0.178079	0.00461207	0.0411333	chr3R	5243661	5274371	ps	FBgn0261552	0	2
	chr3R	5243311	5245400	2090	Peak_8865	1675.21	0.50449	0.178079	0.00461207	0.0411333	chr3R	5238269	5242986	alpha-Man-IIa	FBgn0011740	-326	2
728	chr3R	20476572	20477370	799	Peak_10657	536.881	0.501701	0.182617	0.00600923	0.0493994	chr3R	20475846	20479098	ash2	FBgn0000139	0	1
	chr3R	20476572	20477370	799	Peak_10657	536.881	0.501701	0.182617	0.00600923	0.0493994	chr3R	20460991	20475765	puf	FBgn0039214	-808	1
729	chrX	1973985	1974942	958	Peak_11818	583.191	0.501402	0.175056	0.00418	0.0381848	chrX	1972375	1974438	CG16903	FBgn0040394	0	1
	chrX	1973985	1974942	958	Peak_11818	583.191	0.501402	0.175056	0.00418	0.0381848	chrX	1974642	1987126	Unc-76	FBgn0040395	0	1
