# Supplementary material for: Damage-responsive, maturity-silenced enhancers regulate multiple genes that direct regeneration in Drosophila
Source: eLife. 2020 Jun 3;9:e58305. doi: 10.7554/eLife.58305 (PMC7299344; doi:10.7554/eLife.58305)
Supplement: Supplementary file 4. [file elife-58305-supp4.xlsx]

## Sheet: Primers
Primers for generation of transgenic lines
Mmp1 enhancer	Forward (5'-3')	Reverse (5'-3')
Mmp1-GFP	ACCACCAAGATCTAATCGCCATC	GTGGTTCCACTTGCCGCTGGCA
Mmp1-A-GFP	GTAAGTTGATATACCAGGATGACTCA	GATCTTCAGAGCTCGCTGCCG
Mmp1-B-GFP	GTATGTGCCGAGAGCTAATTAATTAA	CTGCAAAGGGAAAGGGTGAAGG
Mmp1-A1-GFP	GTAAGTTGATATACCAGGATGACTCA	GTTCCTGATGCGCTTTATGGAGC
Mmp1-A2-GFP	TGTCGTGAAAGCAGAATGTCGC	GATCTTCAGAGCTCGCTGCCG
Mmp1-US-GFP	TCTCCCCGCGAATCTCCTGGT	TGTCCAGGGGGCTAGCACAG
DRMS regions
ftz-f1	TGGTTACATACACATATTGCGCATAC	TATTCTTAATGCTACGTTACGTATACAC
bru2	TGATTACAGCTGGGTGCACAATGA	TCATCTCGTGCGGATATTGAAAGT
aspr/CG9572	TCAAGAATATTTACGGCCTCTCAGT	ATGGGCAGATAAAAGGCAGATCG
apt	TCAGTTCTCAGTTTTCAGCTTTTTGG	CTGCGTTTTAGGACTTAGGGTGTTC
aspr RNA in situ probe generation
Anti-sense	AGGAGCAGTGCCATCCCAGTC	TAATACGACTCACTATAGCCGGGTGCAGTGGCTCAGCG
Sense	TAATACGACTCACTATAGAGGAGCAGTGCCATCCCAGTC	CCGGGTGCAGTGGCTCAGCG
