# Supplementary material for: Damage-responsive, maturity-silenced enhancers regulate multiple genes that direct regeneration in Drosophila
Source: eLife. 2020 Jun 3;9:e58305. doi: 10.7554/eLife.58305 (PMC7299344; doi:10.7554/eLife.58305)
Supplement: Supplementary file 5. — Color schemes indicating the degree of regeneration are as in main figures, Y axis is percent of total adult flies scored. Error bars are SEM. [file elife-58305-supp5.xlsx]

## Sheet: Figure 3M
	Early L3 wRNAi		Late L3 wRNAi
	Distribution	SEM	Distribution	SEM
Wild type	0.730542	0.0243287	0.0652787	0.0247556
Nicked	0.223751	0.0172178	0.117894	0.0380063
Part notched	0.041232	0.0114451	0.460123	0.0700077
Full notched	0.00447472	0.00263874	0.30431	0.0694904
Ablated	0	0	0.0523941	0.0142138

## Sheet: Figure 3 sup2A
	Early L3 wRNAi		Late L3 wRNAi
	Distribution	SEM	Distribution	SEM
Wild type	1	0	0.355475	0.125679
Nicked	0	0	0.426444	0.150771
Part notched	0	0	0.13285	0.0469697
Full notched	0	0	0.0227743	0.00805194
Ablated	0	0	0.0624569	0.0220818

## Sheet: Figure 4E
	wRNAi		wgRNAi		Mmp1RNAi
	Distribution	SEM	Distribution	SEM	Distribution	SEM
Wild type	0.0388889	0.00947823	0.00543478	0.00192149	0.165986	0.000726253
Nicked	0.0775641	0.0176766	0	0	0.0748299	0
Part notched	0.660148	0.0183337	0.251921	0.00984293	0.148299	0.00372028
Full notched	0.12276	0.0141137	0.345125	0.0135995	0.20034	0.00514011
Ablated	0.100639	0.0141672	0.397519	0.015742	0.410544	0.00594991

## Sheet: Figure 4F
	wRNAi		MycOE		MycRNAi >>PDM2		MycRNAi >>DVE
	Distribution	SEM	Distribution	SEM	Distribution	SEM	Distribution	SEM
Wild type	0.0151654	0.00351227	0.0993189	0.0105713	0.018544	0.00429602	0	0
Nicked	0.0188113	0.00329549	0.109509	0.0126563	0.0214286	0.00505076	0	0
Part notched	0.711197	0.00937583	0.628806	0.0135375	0.512454	0.0178735	0.0839286	0.0182217
Full notched	0.190326	0.00458471	0.113221	0.00797483	0.162683	0.0144086	0.164675	0.0176863
Ablated	0.0645003	0.0101169	0.0491453	0.00594847	0.28489	0.0103222	0.751397	0.0210639

## Sheet: Figure 4 sup 1E
	wRNAi		upd1RNAi		upd2RNAi		upd3RNAi		DomeRNAi		Stat92ERNAi
	Distribution	SEM	Distribution	SEM	Distribution	SEM	Distribution	SEM	Distribution	SEM	Distribution	SEM
Wild type	0.0814904	0.0125816	0.0477285	0.00911634	0.122784	0.0152154	0.0532605	0.00462787	0.0252525	0.00588366	0.0234375	0.00581269
Nicked	0.072822	0.0104841	0.0138889	0.00491046	0.0314764	0.00913282	0.0175313	0.00305415	0.0119048	0.00420897	0.0856877	0.011947
Part notched	0.653212	0.0308807	0.221958	0.0152386	0.380285	0.0208395	0.642275	0.0148618	0.330121	0.0171134	0.162348	0.0113872
Full notched	0.150304	0.0145508	0.274253	0.011257	0.252079	0.0233909	0.0957755	0.00779785	0.262031	0.0145124	0.398591	0.011604
Ablated	0.0421717	0.00844053	0.442171	0.0149661	0.213375	0.0162185	0.191157	0.0122391	0.370691	0.0170583	0.329936	0.0133568

## Sheet: Figure 5V
	wRNAi		asprRNAi (1)		asprRNAi (2)		aspr Mi[MIC]
	Distribution	SEM	Distribution	SEM	Distribution	SEM	Distribution	SEM
Wild type	0	0	0.0416667	0.0147314	0.0555556	0.0277778	0	0
Nicked	0.601122	0.0156153	0.447779	0.0294175	0.0178571	0.00892857	0.0625	0.0441942
Part notched	0.315892	0.0178952	0.192926	0.0163618	0.535714	0.0384225	0.196429	0.0378807
Full notched	0.0503472	0.00889795	0.215064	0.0239244	0.373016	0.0639246	0.535714	0.0252538
Ablated	0.0326389	0.00582716	0.102564	0.0147366	0.0178571	0.00892857	0.205357	0.0568211

## Sheet: Figure 5 sup2D
	wRNAi		AsprRNAi
	Distribution	SEM	Distribution	SEM
Wild type	0	0	0	0
Nicked	0.128927	0.0138452	0.0494916	0.011794
Part notched	0.372163	0.0243113	0.148083	0.0126293
Full notched	0.471265	0.0202771	0.736653	0.0112428
Ablated	0.0276451	0.00489001	0.0657729	0.00624017

## Sheet: Figure 5 sup2G
	wRNAi early L3		asprMIMIC early L3		wRNAi late L3		asprMIMIC late L3
	Distribution	SEM	Distribution	SEM	Distribution	SEM	Distribution	SEM
Wild type	0.156818	0.0167882	0.148222	0.0195056	0	0	0	0
Nicked	0.747944	0.0192451	0.276208	0.0433914	0.0707071	0.0162809	0	0
Part notched	0.0595238	0.0107896	0.371489	0.0352322	0.259686	0.0200929	0.101587	0.0233932
Full notched	0.0357143	0.0134987	0.20408	0.0309593	0.625415	0.0326498	0.85119	0.0219692
Ablated	0	0	0	0	0.0441919	0.0125354	0.0472222	0.0129696

## Sheet: Figure 5 sup2H
	wRNAi		asprHA
	Distribution	SEM	Distribution	SEM
Wild type	0.183696	0.0238264	0.222222	0.0785674
Nicked	0.0217391	0.0153719	0	0
Part notched	0.161957	0.00845454	0.1	0.0204124
Full notched	0.445652	0.0384297	0.366667	0.0656167
Ablated	0.186957	0.00922313	0.311111	0.020787

## Sheet: Figure 6D
	wRNAi early L3		aptRNAi early L3		wRNAi late L3		aptRNAi late L3
	Distribution	SEM	Distribution	SEM	Distribution	SEM	Distribution	SEM
Wild type	0.395509	0.0295719	0.651971	0.0153608	0.0438988	0.00784344	0.392857	0.0257431
Nicked	0.368371	0.0163224	0.323621	0.014192	0.0540179	0.0110472	0.29619	0.0226629
Part notched	0.220247	0.0192662	0.0244079	0.00482145	0.652757	0.0145158	0.267203	0.0252185
Full notched	0.00892857	0.00315673	0	0	0.236826	0.0104557	0.04375	0.010263
Ablated	0.00694444	0.00245523	0	0	0.0125	0.00441942	0	0

[truncated: 6 more sheets: Figure 6I, Figure 6 sup1C, Figure 6 sup1D, Figure 6 sup2A, Figure 6 sup2B, Figure 6 sup2C]
